# Supplementary material for: Vacuolar H+-ATPase determines daughter cell fates through asymmetric segregation of the nucleosome remodeling and deacetylase complex
Source: eLife. 2024 Jul 12;12:RP89032. doi: 10.7554/eLife.89032 (PMC11245309; doi:10.7554/eLife.89032)
Supplement: Supplementary file 3. [file elife-89032-supp3.xlsx]

## Sheet: hda-1ivsWT
WormBase ID	Public Name	baseMean	log2FoldChange	lfcSE	stat	pvalue	padj
WBGene00018297	F41F3.3	16627	-11.156	0.278368	-40.0766	0	0
WBGene00001714	grl-5	3051.65	-9.61124	0.354189	-27.1359	3.71124e-162	3.5445e-159
WBGene00009041	cut-3	10460.3	-9.30644	0.248001	-37.5258	0	0
WBGene00006947	wrt-1	11221.2	-8.71552	0.270585	-32.2099	1.28248e-227	5.71603e-224
WBGene00001724	grl-15	3045.41	-8.59377	0.29031	-29.6021	1.40522e-192	3.13153e-189
WBGene00000650	col-74	11858.2	-8.48887	0.270741	-31.3542	8.52856e-216	2.85088e-212
WBGene00009983	cut-2	17023	-8.37558	0.302386	-27.6983	7.31723e-169	1.22298e-165
WBGene00012540	Y37A1B.7	2204.97	-8.33569	0.672652	-12.3923	2.87716e-35	1.45722e-33
WBGene00000214	asp-1	7116.54	-8.32209	0.265974	-31.2892	6.55215e-215	1.75218e-211
WBGene00022679	ZK180.5	7902.1	-8.01461	0.29519	-27.1507	2.48212e-162	2.55296e-159
WBGene00000691	col-117	457.326	-7.98109	0.507786	-15.7174	1.14915e-55	1.14667e-53
WBGene00000641	col-65	1736.64	-7.96036	0.320368	-24.8476	2.74765e-136	1.93362e-133
WBGene00000653	col-77	1057.42	-7.94021	0.392302	-20.24	4.34925e-91	1.09724e-88
WBGene00010835	M03B6.3	4602.25	-7.8406	0.312697	-25.0741	9.54075e-139	7.08719e-136
WBGene00001716	grl-7	4195.63	-7.81379	0.284399	-27.4748	3.51713e-166	4.27523e-163
WBGene00003888	osm-8	1593.07	-7.71992	0.713102	-10.8258	2.59695e-27	9.1862e-26
WBGene00010461	K01D12.1	542.316	-7.66903	0.411094	-18.6552	1.14588e-77	1.98981e-75
WBGene00012032	T26C5.2	1599.25	-7.51269	0.322054	-23.3275	2.33433e-120	1.20047e-117
WBGene00007560	C14A4.9	693.255	-7.48081	0.375684	-19.9125	3.16981e-88	7.43572e-86
WBGene00009982	F53F1.4	1329.02	-7.36345	0.280926	-26.2114	1.97172e-151	1.64775e-148
WBGene00000699	col-125	2021.76	-7.25739	0.355496	-20.4149	1.23401e-92	3.4375e-90
WBGene00000599	col-10	1172.58	-6.99372	0.343973	-20.3322	6.67626e-92	1.7167e-89
WBGene00018630	F49D11.6	506.217	-6.96262	0.339495	-20.5088	1.79808e-93	5.11534e-91
WBGene00000738	col-165	14491.6	-6.95535	0.263879	-26.3581	4.14041e-153	3.69076e-150
WBGene00010714	mam-3	804.811	-6.70744	0.272294	-24.6331	5.58996e-134	3.73716e-131
WBGene00019520	K08B12.1	4434.22	-6.63163	0.303883	-21.823	1.40416e-105	5.86719e-103
WBGene00021326	Y34B4A.10	738.374	-6.56784	0.863042	-7.6101	2.73878e-14	4.34403e-13
WBGene00000717	col-144	791.837	-6.51398	0.663155	-9.82272	8.98852e-23	2.56259e-21
WBGene00044395	R12C12.10	201.525	-6.4951	0.476055	-13.6436	2.20416e-42	1.51917e-40
WBGene00017998	F33D4.6	5508.53	-6.40895	0.233606	-27.4349	1.05121e-165	1.17131e-162
WBGene00017307	F09F9.2	671.06	-6.34022	0.294274	-21.5453	5.86156e-103	2.30515e-100
WBGene00012383	ttr-17	575.681	-6.29366	0.376063	-16.7357	7.20303e-63	8.23177e-61
WBGene00007867	C32H11.4	469.748	-6.28971	0.323389	-19.4494	2.95127e-84	6.16584e-82
WBGene00014067	ZK675.4	1165.08	-6.27397	0.261223	-24.0176	1.82034e-127	1.05825e-124
WBGene00004300	ram-2	3074.54	-6.26647	0.326038	-19.22	2.51547e-82	4.80491e-80
WBGene00021625	Y47D7A.13	4048.83	-6.24081	0.29115	-21.435	6.29978e-102	2.33984e-99
WBGene00008595	clec-56	231.706	-6.18179	0.449673	-13.7473	5.28785e-43	3.76084e-41
WBGene00044024	C35A5.11	2044.24	-6.17774	0.768132	-8.04255	8.79859e-16	1.56236e-14
WBGene00020803	T25E4.1	415.021	-6.12582	0.374592	-16.3533	4.11975e-60	4.47847e-58
WBGene00017569	F18E9.3	549.438	-6.09395	0.34362	-17.7345	2.26939e-70	3.40945e-68
WBGene00011278	R74.2	485.682	-6.03971	0.324284	-18.6247	2.02452e-77	3.47049e-75
WBGene00017483	lgc-22	5123.87	-6.00186	0.244447	-24.5528	4.0347e-133	2.56895e-130
WBGene00011856	T20D3.2	987.088	-5.97369	0.280438	-21.3013	1.10411e-100	3.99003e-98
WBGene00009773	lipl-2	183.69	-5.96437	0.449415	-13.2714	3.39134e-40	2.08008e-38
WBGene00012429	Y11D7A.5	247.406	-5.95349	0.409601	-14.5349	7.28505e-48	6.12631e-46
WBGene00017716	sups-1	3090.67	-5.93614	0.214817	-27.6335	4.40366e-168	5.88813e-165
WBGene00017018	D1014.5	1464.95	-5.89918	0.254266	-23.2008	4.47217e-119	2.21472e-116
WBGene00000594	col-3	646.403	-5.86734	0.663113	-8.84818	8.89614e-19	1.93101e-17
WBGene00001725	grl-16	4927.26	-5.86395	0.247954	-23.6494	1.19778e-123	6.67315e-121
WBGene00018737	F53B1.4	6281.19	-5.82568	0.203054	-28.6903	5.04038e-181	9.62785e-178
WBGene00006950	wrt-4	1002.27	-5.81227	0.259557	-22.393	4.60253e-111	2.19787e-108
WBGene00000740	col-167	1273.22	-5.77993	0.740638	-7.80398	5.99842e-15	1.00256e-13
WBGene00017723	bgnt-1.2	362.485	-5.7737	0.308964	-18.6873	6.28281e-78	1.10536e-75
WBGene00021389	Y38A10A.2	1032.52	-5.7418	0.270334	-21.2397	4.10719e-100	1.44519e-97
WBGene00000704	col-130	441.452	-5.68735	0.41679	-13.6456	2.14447e-42	1.48569e-40
WBGene00006929	vit-5	2660.44	-5.64122	1.91098	-2.95201	0.00315712	0.00978532
WBGene00010673	K08E7.5	863.662	-5.59391	0.251801	-22.2156	2.42912e-109	1.11999e-106
WBGene00000216	asp-3	5235.21	-5.59292	0.293814	-19.0356	8.65617e-81	1.60752e-78
WBGene00020242	phat-5	1094.34	-5.54231	0.263816	-21.0082	5.51803e-98	1.84454e-95
WBGene00015911	C17F4.3	146.811	-5.54174	0.467777	-11.847	2.23121e-32	1.01475e-30
WBGene00018303	F41G3.10	71.359	-5.5087	0.620723	-8.87465	7.01512e-19	1.53517e-17
WBGene00011235	suro-1	1148.35	-5.47856	0.320545	-17.0914	1.72061e-65	2.17041e-63
WBGene00019273	H43E16.1	417.155	-5.47127	0.378705	-14.4473	2.60619e-47	2.13788e-45
WBGene00004112	pqn-22	1215.93	-5.43336	0.256972	-21.1438	3.14632e-99	1.07871e-96
WBGene00010285	F58H1.2	986.08	-5.42152	0.260763	-20.791	5.21893e-96	1.66149e-93
WBGene00016329	osr-1	746.772	-5.40043	0.761912	-7.088	1.36062e-12	1.85263e-11
WBGene00016276	C30G12.4	116.21	-5.33823	0.479258	-11.1385	8.14553e-29	3.04229e-27
WBGene00020983	W03D2.9	206.305	-5.31984	0.375246	-14.1769	1.27267e-45	9.95135e-44
WBGene00004998	spp-13	661.684	-5.31955	0.289527	-18.3732	2.15179e-75	3.50872e-73
WBGene00019887	R05D8.11	292.743	-5.29881	0.340677	-15.5538	1.50039e-54	1.46436e-52
WBGene00012445	Y16B4A.2	5645.14	-5.28237	0.275196	-19.195	4.07613e-82	7.67633e-80
WBGene00019906	R05G9R.1	2128.95	-5.27987	0.190855	-27.6643	1.87989e-168	2.79289e-165
WBGene00010505	K02D3.2	355.463	-5.26671	0.781368	-6.74037	1.57979e-11	1.92732e-10
WBGene00012433	Y11D7A.9	544.213	-5.26133	0.255541	-20.589	3.44379e-94	1.02326e-91
WBGene00013891	ZC434.3	110.315	-5.25785	0.565258	-9.30167	1.38253e-20	3.44886e-19
WBGene00006948	wrt-2	8132.85	-5.25289	0.257657	-20.3871	2.17454e-92	5.81516e-90
WBGene00019261	H34I24.2	632.866	-5.2419	0.27254	-19.2335	1.93932e-82	3.75806e-80
WBGene00001713	grl-4	183.057	-5.23619	0.888859	-5.89092	3.84059e-09	3.5173e-08
WBGene00000172	aqp-4	545.528	-5.23083	0.257226	-20.3356	6.22888e-92	1.63307e-89
WBGene00235268	Y54G2A.76	1439.3	-5.22718	0.57895	-9.02872	1.73689e-19	3.97671e-18
WBGene00006927	vit-3	731.878	-5.22375	1.52694	-3.42105	0.000623802	0.0023022
WBGene00018694	F52E1.5	209.154	-5.2048	0.407879	-12.7607	2.71918e-37	1.5024e-35
WBGene00000720	col-147	588.457	-5.18637	0.672707	-7.70971	1.26108e-14	2.04386e-13
WBGene00018713	F52G3.5	309.277	-5.17667	0.379011	-13.6583	1.80028e-42	1.26029e-40
WBGene00000678	col-104	1823.02	-5.17421	0.276288	-18.7276	2.94965e-78	5.25864e-76
WBGene00021503	ctsa-4.2	107.766	-5.15249	0.486775	-10.585	3.49939e-26	1.16976e-24
WBGene00008215	C49F8.3	698.319	-5.15091	0.358114	-14.3834	6.57417e-47	5.35996e-45
WBGene00012335	W07G4.1	71.0692	-5.14415	0.575426	-8.93973	3.90116e-19	8.69374e-18
WBGene00007401	C07A9.5	233.866	-5.1147	0.369328	-13.8487	1.29605e-43	9.31693e-42
WBGene00008477	clec-17	184.306	-5.11183	0.376712	-13.5696	6.06514e-42	4.1166e-40
WBGene00006408	tag-18	263.441	-5.10285	0.956536	-5.33471	9.56971e-08	7.13247e-07
WBGene00019779	endu-2	218.649	-5.10103	0.46084	-11.069	1.77391e-28	6.46292e-27
WBGene00018293	F41E6.12	432.516	-5.08213	0.375968	-13.5175	1.23345e-41	8.20519e-40
WBGene00016731	C46H11.7	137.327	-5.08183	0.458533	-11.0828	1.52041e-28	5.5697e-27
WBGene00000853	cut-6	2858.01	-5.05325	0.201187	-25.1171	3.23234e-139	2.54233e-136
WBGene00008512	F01G10.10	427.313	-5.05307	0.293228	-17.2325	1.51333e-66	1.98379e-64
WBGene00004120	pqn-32	7982.56	-5.00254	0.257262	-19.4453	3.19433e-84	6.57099e-82
WBGene00018026	F35A5.4	120.699	-4.98412	0.458027	-10.8817	1.409e-27	5.03735e-26
WBGene00011757	cht-2	332.102	-4.98398	0.348974	-14.2818	2.84212e-46	2.27557e-44
WBGene00001727	grl-18	121.218	-4.96531	0.505919	-9.81443	9.75922e-23	2.77639e-21
WBGene00016733	phat-2	551.57	-4.96411	0.268722	-18.473	3.40536e-76	5.76368e-74
WBGene00020148	T01D1.3	83.6412	-4.92015	0.519731	-9.46674	2.88724e-21	7.46717e-20
WBGene00017841	F26G1.5	248.392	-4.90931	0.351369	-13.972	2.31205e-44	1.6986e-42
WBGene00013173	Y53F4B.27	925.767	-4.89645	0.276234	-17.7257	2.65462e-70	3.94388e-68
WBGene00189995	C06E7.88	457.962	-4.89256	0.281551	-17.3771	1.22919e-67	1.66015e-65
WBGene00011075	R07A4.4	554.341	-4.88401	0.290727	-16.7993	2.46933e-63	2.94799e-61
WBGene00022577	nstp-3	476.573	-4.87313	0.250495	-19.454	2.69611e-84	5.72217e-82
WBGene00195051	T22D1.18	63.4413	-4.8661	0.602393	-8.07796	6.5861e-16	1.17841e-14
WBGene00011508	T05H10.3	17277.7	-4.85556	0.224065	-21.6703	3.9109e-104	1.58463e-101
WBGene00003957	pcp-2	201.807	-4.84859	0.425356	-11.3989	4.23426e-30	1.70019e-28
WBGene00007949	C35A5.5	186.077	-4.81868	0.34355	-14.0261	1.0788e-44	8.10372e-43
WBGene00020384	T09D3.3	251.759	-4.78413	0.384338	-12.4477	1.43908e-35	7.4581e-34
WBGene00018092	F36F12.1	322.499	-4.78242	0.33292	-14.365	8.5753e-47	6.94911e-45
WBGene00006926	vit-2	6522.79	-4.77721	1.6996	-2.81078	0.00494217	0.0144631
WBGene00012199	mltn-3	552.814	-4.73139	0.271925	-17.3996	8.31221e-68	1.13411e-65
WBGene00000669	col-94	364.47	-4.73063	0.878685	-5.38376	7.29457e-08	5.53551e-07
WBGene00009094	F23H12.5	4500.3	-4.69654	0.234235	-20.0505	1.99766e-89	4.76977e-87
WBGene00044463	W09G12.10	719.422	-4.69101	0.242361	-19.3555	1.83229e-83	3.65665e-81
WBGene00019184	H10E21.4	535.442	-4.68432	0.321606	-14.5654	4.66383e-48	3.94684e-46
WBGene00014253	ZK1320.3	103.514	-4.66015	0.487799	-9.55342	1.25488e-21	3.36252e-20
WBGene00016759	C49A9.5	99.9384	-4.64785	0.475527	-9.77412	1.45422e-22	4.06787e-21
WBGene00017535	atf-8	825.478	-4.6362	0.255587	-18.1394	1.55687e-73	2.42056e-71
WBGene00016962	C56C10.4	933.573	-4.63586	0.271907	-17.0495	3.52815e-65	4.40887e-63
WBGene00017794	mltn-13	50.399	-4.6348	0.57726	-8.02896	9.83017e-16	1.73861e-14
WBGene00006930	vit-6	4970.82	-4.62875	1.58727	-2.91617	0.00354359	0.0108374
WBGene00022611	ZC449.1	465.167	-4.58593	0.306872	-14.9441	1.70107e-50	1.51633e-48
WBGene00007883	C33A12.4	237.309	-4.58351	0.313818	-14.6056	2.58627e-48	2.20261e-46
WBGene00012018	T25C12.3	7712.47	-4.57255	0.232342	-19.6803	3.18296e-86	6.97694e-84
WBGene00000625	col-48	1334.64	-4.52374	0.270998	-16.6929	1.47631e-62	1.67286e-60
WBGene00011107	R07E3.6	5649.08	-4.52114	0.227454	-19.8771	6.42024e-88	1.455e-85
WBGene00004127	abu-12	845.388	-4.51848	0.28646	-15.7735	4.73649e-56	4.79785e-54
WBGene00004221	ptr-6	1452.43	-4.4991	0.228309	-19.7062	1.90849e-86	4.25308e-84
WBGene00007600	C15C6.1	556.878	-4.49561	0.269412	-16.6867	1.63694e-62	1.83929e-60
WBGene00016805	C50D2.1	683.508	-4.48811	0.257371	-17.4383	4.22395e-68	5.88317e-66
WBGene00018969	F56D3.1	4475.92	-4.48769	0.208782	-21.4946	1.74974e-102	6.68449e-100
WBGene00000218	asp-5	2036.97	-4.48378	0.244145	-18.3652	2.49344e-75	4.01684e-73
WBGene00009791	F46F3.3	349.305	-4.48099	0.279344	-16.0411	6.59595e-58	6.89019e-56
WBGene00220261	ZC434.10	89.8254	-4.46103	0.556461	-8.01678	1.08551e-15	1.90477e-14
WBGene00019285	cbn-1	1086.38	-4.44473	0.215845	-20.5923	3.21902e-94	9.78217e-92
WBGene00008727	F13A7.12	181.74	-4.41254	0.386828	-11.407	3.8582e-30	1.55855e-28
WBGene00015335	acdh-6	150.194	-4.3997	0.427618	-10.2889	7.91125e-25	2.48313e-23
WBGene00013171	Y53F4B.25	565.907	-4.38278	0.313417	-13.9839	1.95579e-44	1.45283e-42
WBGene00004156	pqn-74	4118.39	-4.37393	0.560542	-7.80303	6.04367e-15	1.0076e-13
WBGene00013352	lon-8	1911.78	-4.35946	0.180942	-24.0931	2.95265e-128	1.79454e-125
WBGene00000689	col-115	106.97	-4.35517	0.461149	-9.44417	3.5824e-21	9.22934e-20
WBGene00020576	T19D12.1	3510.08	-4.34886	0.253673	-17.1436	7.01736e-66	9.02203e-64
WBGene00219436	C49H3.16	365.239	-4.3289	0.31356	-13.8057	2.3559e-43	1.68453e-41
WBGene00015841	skpo-2	2646.19	-4.32749	0.196156	-22.0615	7.41667e-108	3.30561e-105
WBGene00016732	phat-1	231.233	-4.32666	0.365548	-11.8361	2.54088e-32	1.15167e-30
WBGene00020582	oig-8	157.84	-4.32602	0.366242	-11.8119	3.38653e-32	1.51442e-30
WBGene00000683	col-109	1898.82	-4.3229	0.311127	-13.8943	6.85626e-44	4.98234e-42
WBGene00001681	gpc-1	110.984	-4.32131	0.471912	-9.15702	5.33516e-20	1.26483e-18
WBGene00008964	mltn-9	1403.54	-4.32035	0.257403	-16.7844	3.17483e-63	3.7567e-61
WBGene00004230	ptr-16	726.94	-4.31968	0.247435	-17.4578	3.00036e-68	4.22293e-66
WBGene00007368	C06B8.2	648.935	-4.31745	0.310479	-13.9058	5.84249e-44	4.26885e-42
WBGene00016134	C26B9.5	708.614	-4.30633	0.306502	-14.0499	7.71294e-45	5.85964e-43
WBGene00019097	F59B1.2	229.064	-4.30202	0.471984	-9.11475	7.88497e-20	1.84965e-18
WBGene00019957	R08E3.1	2413.35	-4.30188	0.195182	-22.0403	1.1826e-107	5.10083e-105
WBGene00011439	T04F3.4	62.3925	-4.29361	0.506599	-8.47537	2.34342e-17	4.62151e-16
WBGene00018646	mul-1	84.0961	-4.28504	0.627004	-6.83415	8.24938e-12	1.03863e-10
WBGene00000219	asp-6	2238.36	-4.26162	0.276859	-15.3927	1.831e-53	1.73633e-51
WBGene00011624	T08G5.3	240.927	-4.2529	0.372886	-11.4054	3.93056e-30	1.583e-28
WBGene00004133	abu-13	4915.33	-4.25043	0.225459	-18.8523	2.81235e-79	5.0816e-77
WBGene00015949	C18A11.3	201.254	-4.24801	0.430881	-9.85888	6.27441e-23	1.80032e-21
WBGene00000136	amt-4	237.405	-4.2468	0.330619	-12.845	9.17509e-38	5.19831e-36
WBGene00004232	ptr-18	2396.57	-4.24213	0.203726	-20.8227	2.69328e-96	8.78338e-94
WBGene00022274	Y73E7A.8	3087.75	-4.23426	0.264757	-15.993	1.42994e-57	1.48215e-55
WBGene00009331	F32D8.7	488.419	-4.2076	0.284365	-14.7965	1.54341e-49	1.35769e-47
WBGene00000739	col-166	1994.54	-4.18736	0.346269	-12.0928	1.15291e-33	5.46653e-32
WBGene00044662	F26G1.9	125.154	-4.17063	0.394882	-10.5617	4.48462e-26	1.49536e-24
WBGene00009541	cutl-17	312.132	-4.16844	0.312853	-13.3239	1.68003e-40	1.05463e-38
WBGene00016160	C27D6.1	67.4389	-4.15246	0.495219	-8.3851	5.06809e-17	9.82107e-16
WBGene00008462	E02H4.4	127.243	-4.15127	0.448715	-9.25148	2.21409e-20	5.42208e-19
WBGene00003526	nas-7	229.2	-4.13712	0.448376	-9.22691	2.7856e-20	6.74751e-19
WBGene00020149	T01D1.4	1611.92	-4.13255	0.201356	-20.5236	1.32468e-93	3.85049e-91
WBGene00000742	col-169	142.409	-4.12054	0.442395	-9.31417	1.22909e-20	3.07755e-19
WBGene00011572	mam-5	315.706	-4.10237	0.254412	-16.1249	1.70406e-58	1.7941e-56
WBGene00010049	F54D5.3	370.441	-4.09871	0.323249	-12.6797	7.65954e-37	4.11308e-35
WBGene00017807	F26A1.9	93.4419	-4.09718	0.471131	-8.69649	3.42313e-18	7.20799e-17
WBGene00020194	T03G6.1	2353.19	-4.09053	0.266937	-15.324	5.28901e-53	4.94541e-51
WBGene00022612	ZC449.2	919.389	-4.09051	0.197247	-20.738	1.5732e-95	4.89191e-93
WBGene00001063	dpy-1	4724.24	-4.08445	0.226829	-18.0067	1.72519e-72	2.6213e-70
WBGene00012782	Y43C5A.2	1078.01	-4.07997	0.234397	-17.4063	7.39567e-68	1.01946e-65
WBGene00001211	egl-47	19.5753	-4.05321	0.863262	-4.69522	2.66318e-06	1.59755e-05
WBGene00007210	agmo-1	596.488	-4.05143	0.306263	-13.2286	6.00095e-40	3.59815e-38
WBGene00018221	F40A3.6	193.583	-4.04477	0.310633	-13.0211	9.28786e-39	5.44684e-37
WBGene00000557	cnc-3	177.785	-4.04185	0.362958	-11.1359	8.39268e-29	3.12587e-27
WBGene00018237	irg-7	10891.3	-4.03249	0.200642	-20.098	7.68642e-90	1.86864e-87
WBGene00008741	ctsa-1.2	1579.71	-4.01932	0.245053	-16.4018	1.85666e-60	2.03487e-58
WBGene00007598	C15A11.4	55.0797	-4.01861	0.612426	-6.56179	5.31666e-11	6.11256e-10
WBGene00017969	ctsa-3.1	696.424	-4.01225	0.232184	-17.2805	6.5974e-67	8.82139e-65
WBGene00003091	lys-2	204.558	-4.00595	0.339996	-11.7823	4.81369e-32	2.12422e-30
WBGene00021768	Y51F10.7	272.139	-3.99669	0.295551	-13.5229	1.14618e-41	7.71454e-40
WBGene00003388	moe-3	454.456	-3.99252	0.260739	-15.3123	6.32699e-53	5.83435e-51
WBGene00009796	F46G10.1	283.885	-3.99023	0.328596	-12.1433	6.22787e-34	2.97403e-32
WBGene00017621	txt-17	53.731	-3.98942	0.619836	-6.43624	1.22469e-10	1.35783e-09
WBGene00009528	F38A6.4	120.591	-3.98727	0.482168	-8.26945	1.34575e-16	2.52017e-15
WBGene00008263	C53A5.2	352.331	-3.97494	0.310008	-12.822	1.23423e-37	6.96326e-36
WBGene00016218	pals-23	124.082	-3.97456	0.980648	-4.05299	5.05667e-05	0.000239083
WBGene00017014	dylt-2	39.136	-3.95412	0.637624	-6.20134	5.59858e-10	5.75836e-09
WBGene00010239	F58B4.6	67.8028	-3.94356	0.533263	-7.39515	1.41245e-13	2.10311e-12
WBGene00003532	nas-13	64.214	-3.94224	0.545761	-7.22339	5.07082e-13	7.2053e-12
WBGene00012257	lpr-4	6224.5	-3.93696	0.202894	-19.404	7.13699e-84	1.44589e-81
WBGene00016542	C39H7.4	475.451	-3.93359	0.230961	-17.0314	4.80663e-65	5.95087e-63
WBGene00022665	ZK154.1	994.012	-3.92935	0.24787	-15.8525	1.35177e-56	1.37974e-54
WBGene00020660	T21G5.2	170.104	-3.92826	0.437576	-8.97734	2.77396e-19	6.26532e-18
WBGene00018885	drd-5	56.314	-3.92578	0.633795	-6.19409	5.86239e-10	6.0066e-09
WBGene00009205	F28C6.5	49.751	-3.91506	0.607646	-6.443	1.17136e-10	1.30627e-09
WBGene00006865	slcf-2	202.009	-3.89918	0.350359	-11.1291	9.05702e-29	3.35461e-27
WBGene00198856	T25C12.7	30.5496	-3.89749	0.70736	-5.50991	3.59011e-08	2.8693e-07
WBGene00017515	F16F9.4	365.494	-3.89097	0.311167	-12.5044	7.06173e-36	3.67403e-34
WBGene00000176	aqp-8	108.713	-3.88469	0.407307	-9.53751	1.46305e-21	3.88914e-20
WBGene00008500	F01D5.10	204.95	-3.88425	0.362855	-10.7047	9.67458e-27	3.3426e-25
WBGene00010277	F58G6.7	319.915	-3.88336	0.328381	-11.8258	2.87303e-32	1.2891e-30
WBGene00175027	W02F12.8	73.2871	-3.87773	0.447726	-8.66095	4.67868e-18	9.74433e-17
WBGene00009679	F44D12.2	240.278	-3.87518	0.364187	-10.6407	1.92768e-26	6.58306e-25
WBGene00019148	H03E18.1	6307.68	-3.87066	0.212581	-18.2079	4.46693e-74	7.11039e-72
WBGene00001070	dpy-8	43.5112	-3.86989	0.644781	-6.00187	1.95055e-09	1.86959e-08
WBGene00015403	clec-10	56.5328	-3.86146	0.5266	-7.3328	2.25386e-13	3.3263e-12
WBGene00019935	R07E4.1	661.561	-3.85841	0.227687	-16.9461	2.05751e-64	2.52394e-62
WBGene00016700	C46A5.4	2754.77	-3.85715	0.191476	-20.1442	3.02307e-90	7.48545e-88
WBGene00004990	spp-5	120.212	-3.85301	0.569107	-6.77027	1.28543e-11	1.58702e-10
WBGene00021087	W08E12.6	115.723	-3.85146	0.531725	-7.24334	4.37783e-13	6.25384e-12
WBGene00003754	nlp-16	21.2026	-3.85068	0.783739	-4.91322	8.95936e-07	5.74009e-06
WBGene00002146	ipp-5	394.524	-3.84673	0.286047	-13.4479	3.16598e-41	2.06499e-39
WBGene00006762	unc-25	417.529	-3.84539	0.28962	-13.2774	3.1321e-40	1.93886e-38
WBGene00010204	F57F5.1	406.755	-3.84293	0.313157	-12.2716	1.28724e-34	6.32783e-33
WBGene00019154	glf-1	4235.89	-3.84189	0.211114	-18.1982	5.33512e-74	8.39245e-72
WBGene00015300	C01F1.5	168.927	-3.83421	0.358365	-10.6992	1.02692e-26	3.53891e-25
WBGene00022497	Y119D3B.21	440.366	-3.8329	0.264794	-14.475	1.74291e-47	1.43854e-45
WBGene00014094	ZK829.3	260.829	-3.78818	0.305855	-12.3855	3.12992e-35	1.57925e-33
WBGene00007336	C05C12.4	106.942	-3.7795	0.507055	-7.45382	9.06732e-14	1.37148e-12
WBGene00015794	C15F1.1	143.139	-3.77748	0.484098	-7.80313	6.03901e-15	1.0076e-13
WBGene00008655	lips-3	531.109	-3.77524	0.237681	-15.8836	8.22857e-57	8.4634e-55
WBGene00004058	pmp-1	290.856	-3.77108	0.281854	-13.3795	7.96359e-41	5.11929e-39
WBGene00001702	grd-13	143.893	-3.76719	0.41287	-9.12439	7.21408e-20	1.69823e-18
WBGene00022047	Y66H1A.5	83.3727	-3.76594	0.412715	-9.12478	7.18839e-20	1.69517e-18
WBGene00007916	C34C6.3	322.887	-3.762	0.305928	-12.297	9.39879e-35	4.65449e-33
WBGene00015169	B0403.5	297.638	-3.75667	0.410402	-9.15363	5.50509e-20	1.30281e-18
WBGene00021519	Y41D4B.17	80.7727	-3.75596	0.445637	-8.42829	3.50745e-17	6.85645e-16
WBGene00008652	F10D11.6	3597.86	-3.75379	0.240975	-15.5775	1.03498e-54	1.02509e-52
WBGene00019866	R04B3.1	304.921	-3.75277	0.273899	-13.7013	9.96915e-43	7.05278e-41
WBGene00022474	zig-9	171.828	-3.74713	0.348403	-10.7551	5.60465e-27	1.95665e-25
WBGene00008926	F17H10.2	333.484	-3.73207	0.294321	-12.6803	7.6045e-37	4.09999e-35
WBGene00022517	ZC123.1	5644.19	-3.72761	0.222408	-16.7602	4.77052e-63	5.49885e-61
WBGene00050943	ZC412.10	61.8038	-3.72609	0.587904	-6.33791	2.329e-10	2.51951e-09
WBGene00022415	Y102A11A.5	1295.97	-3.72428	0.280534	-13.2757	3.20417e-40	1.97433e-38
WBGene00004992	spp-7	311.287	-3.7203	0.275402	-13.5086	1.39119e-41	9.16332e-40
WBGene00008605	mlt-9	3369	-3.71903	0.202381	-18.3764	2.03118e-75	3.35294e-73
WBGene00045461	C25F9.14	54.3812	-3.71862	0.563179	-6.60292	4.0314e-11	4.70776e-10
WBGene00017120	tctn-1	52.8943	-3.71485	0.5208	-7.13298	9.82195e-13	1.35811e-11
WBGene00016769	C49C8.5	165.695	-3.71428	0.387189	-9.59292	8.56235e-22	2.32698e-20
WBGene00000745	col-172	93.8466	-3.71267	0.476973	-7.78381	7.03701e-15	1.16815e-13
WBGene00010001	F53F8.4	198.049	-3.70522	0.489371	-7.57139	3.69241e-14	5.78796e-13
WBGene00012440	nlp-53	63.442	-3.7028	0.481002	-7.69809	1.38113e-14	2.23043e-13
WBGene00010070	nep-17	14958	-3.70148	0.224841	-16.4626	6.80635e-61	7.5213e-59
WBGene00015935	C17H12.10	34.2043	-3.70103	0.667536	-5.54432	2.95105e-08	2.39723e-07
WBGene00044533	F41F3.8	33.3024	-3.69432	0.681293	-5.4225	5.877e-08	4.52919e-07
WBGene00015280	C01B10.6	968.036	-3.69121	0.26334	-14.0169	1.22834e-44	9.17547e-43
WBGene00001644	gly-19	119.761	-3.69007	0.372484	-9.90666	3.89465e-23	1.12474e-21
WBGene00008509	F01G10.6	162.277	-3.68635	0.42501	-8.67354	4.18873e-18	8.76487e-17
WBGene00021879	clec-83	420.145	-3.67466	0.293467	-12.5215	5.69267e-36	2.97331e-34
WBGene00019761	M03F8.1	232.37	-3.66286	0.309007	-11.8536	2.06026e-32	9.40195e-31
WBGene00017892	F28B4.3	4629.93	-3.65819	0.257735	-14.1936	1.00357e-45	7.89338e-44
WBGene00018282	F41D9.2	616.725	-3.65364	0.269003	-13.5822	5.10954e-42	3.50357e-40
WBGene00000785	cpr-5	189.056	-3.65163	0.385404	-9.47483	2.67197e-21	6.95077e-20
WBGene00000718	col-145	35.5765	-3.63544	0.635754	-5.71832	1.07584e-08	9.3228e-08
WBGene00002268	lec-5	1848.53	-3.63504	0.224619	-16.1831	6.63204e-59	7.09416e-57
WBGene00016976	C56E10.3	18.5842	-3.63369	0.812452	-4.4725	7.73099e-06	4.28748e-05
WBGene00006634	tsp-8	99.9515	-3.63169	0.501992	-7.23456	4.67044e-13	6.65762e-12
WBGene00219362	ZK470.14	45.9494	-3.62784	0.562937	-6.44449	1.1599e-10	1.29458e-09
WBGene00008277	mltn-12	217.922	-3.62717	0.303916	-11.9348	7.79569e-33	3.59435e-31
WBGene00013457	paqr-3	112.44	-3.61928	0.494384	-7.32077	2.46547e-13	3.6266e-12
WBGene00044500	T19E7.6	184.163	-3.61761	0.312792	-11.5655	6.16119e-31	2.5664e-29
WBGene00010594	swt-5	160.798	-3.61204	0.359411	-10.0499	9.19827e-24	2.76382e-22
WBGene00022610	ltah-1.2	275.855	-3.61125	0.321598	-11.2291	2.9351e-29	1.1181e-27
WBGene00006914	vha-5	1603.96	-3.61023	0.222163	-16.2504	2.2209e-59	2.39481e-57
WBGene00003591	nex-4	122.894	-3.59506	0.395708	-9.08514	1.03561e-19	2.40401e-18
WBGene00009151	F26D2.13	25.3502	-3.59403	0.718827	-4.99986	5.73715e-07	3.81649e-06
WBGene00009720	F45B8.3	39.5042	-3.59246	0.571547	-6.28551	3.26783e-10	3.4677e-09
WBGene00015231	cutl-14	137.727	-3.5909	0.414914	-8.65456	4.94808e-18	1.02734e-16
WBGene00011427	T04C12.1	195.496	-3.58716	0.321319	-11.1639	6.12703e-29	2.30773e-27
WBGene00007343	C05E7.1	521.237	-3.58569	0.232963	-15.3917	1.86198e-53	1.75328e-51
WBGene00020360	math-41	545.875	-3.5835	0.279957	-12.8002	1.63585e-37	9.19034e-36
WBGene00020083	R57.2	227.237	-3.58091	0.346187	-10.3439	4.46206e-25	1.41045e-23
WBGene00011590	bus-19	926.828	-3.58023	0.251138	-14.2561	4.11071e-46	3.25233e-44
WBGene00012942	Y47D3B.6	1138.31	-3.57565	0.269748	-13.2555	4.19281e-40	2.54828e-38
WBGene00006068	sto-6	88.3499	-3.56177	0.388965	-9.15703	5.33453e-20	1.26483e-18
WBGene00271795	Y46C8AM.1	26.9082	-3.55653	0.790229	-4.50063	6.77536e-06	3.80165e-05
WBGene00010008	F53H4.3	489.701	-3.55468	0.352854	-10.0741	7.19283e-24	2.18085e-22
WBGene00010554	mlc-6	17.4744	-3.5504	0.826706	-4.29463	1.74986e-05	9.08285e-05
WBGene00006319	sup-10	27.5594	-3.5433	0.707179	-5.01046	5.42994e-07	3.62656e-06
WBGene00020743	mam-8	411.962	-3.53995	0.303573	-11.6609	2.01789e-31	8.62018e-30
WBGene00015822	C16B8.2	113.899	-3.53879	0.415201	-8.52309	1.55353e-17	3.09571e-16
WBGene00009229	F28G4.4	80.063	-3.53315	0.463936	-7.61559	2.62488e-14	4.17327e-13
WBGene00020836	lgc-34	433.413	-3.53024	0.281537	-12.5392	4.55783e-36	2.39932e-34
WBGene00009787	F46F2.3	25.5023	-3.52822	0.80112	-4.40411	1.06219e-05	5.76166e-05
WBGene00015153	B0348.5	149.991	-3.52781	0.363725	-9.69911	3.04154e-22	8.40258e-21
WBGene00011182	R09H10.5	3995.02	-3.52161	0.172521	-20.4126	1.29108e-92	3.52305e-90
WBGene00001242	elo-4	826.226	-3.5165	0.234662	-14.9853	9.15598e-51	8.27193e-49
WBGene00000084	aex-1	75.3118	-3.51389	0.519254	-6.76719	1.31307e-11	1.61519e-10
WBGene00011880	T21B6.3	3892.19	-3.51315	0.264917	-13.2613	3.87911e-40	2.36838e-38
WBGene00008076	lgc-43	266.363	-3.50212	0.311444	-11.2448	2.45686e-29	9.38591e-28
WBGene00001444	flp-1	215.169	-3.50083	0.358434	-9.76702	1.55967e-22	4.35373e-21
WBGene00011869	dod-6	1040.9	-3.50081	0.349988	-10.0027	1.48371e-23	4.41841e-22
WBGene00011462	vap-2	23.8264	-3.4973	0.709258	-4.93093	8.18411e-07	5.28136e-06
WBGene00007425	C08B6.4	2172.51	-3.49579	0.199098	-17.5581	5.15797e-69	7.41583e-67
WBGene00001754	gst-6	59.6953	-3.49559	0.640247	-5.45975	4.76812e-08	3.7327e-07
WBGene00020554	T19A5.3	7767.61	-3.48675	0.17898	-19.4812	1.58473e-84	3.41766e-82
WBGene00019979	R09B5.11	154.807	-3.48385	0.408651	-8.52524	1.52489e-17	3.04318e-16
WBGene00016340	gba-2	59.3383	-3.47856	0.515745	-6.74473	1.53312e-11	1.87208e-10
WBGene00017124	E04F6.4	59.2403	-3.47765	0.518154	-6.71161	1.92486e-11	2.32917e-10
WBGene00008732	F13B12.4	183.327	-3.47762	0.504192	-6.89741	5.296e-12	6.79585e-11
WBGene00017691	ilys-5	44.9818	-3.4722	0.618149	-5.6171	1.94193e-08	1.62082e-07
WBGene00044058	F17B5.6	125.771	-3.46395	0.340963	-10.1593	3.01114e-24	9.27694e-23
WBGene00044016	C35A5.10	55.0297	-3.46051	0.502209	-6.89057	5.557e-12	7.1103e-11
WBGene00014107	ZK856.6	21.7654	-3.45723	0.79434	-4.35233	1.34696e-05	7.17254e-05
WBGene00009806	F47B8.5	181.868	-3.45331	0.327296	-10.551	5.02499e-26	1.6631e-24
WBGene00017068	D2092.8	107.717	-3.44901	0.37722	-9.14323	6.06121e-20	1.43188e-18
WBGene00020084	R105.1	68.6495	-3.44007	0.494547	-6.95601	3.50056e-12	4.57984e-11
WBGene00017957	F31F4.1	54.996	-3.43923	0.50048	-6.87186	6.33697e-12	8.06201e-11
WBGene00018292	F41E6.11	222.42	-3.43894	0.363627	-9.45733	3.15916e-21	8.15466e-20
WBGene00014039	ZK662.2	192.098	-3.43632	0.350561	-9.80234	1.10005e-22	3.11628e-21
WBGene00009830	cutl-18	742.16	-3.4324	0.22097	-15.5333	2.06329e-54	1.99914e-52
WBGene00000033	abu-10	130.23	-3.43001	0.424157	-8.08665	6.13296e-16	1.10072e-14
WBGene00013872	ZC374.2	2968.9	-3.42883	0.230545	-14.8728	4.95262e-50	4.38553e-48
WBGene00016425	C34H4.2	53.6575	-3.42752	0.569843	-6.01485	1.80051e-09	1.73199e-08
WBGene00015660	catp-3	172.089	-3.42626	0.422077	-8.11762	4.75429e-16	8.55581e-15
WBGene00017262	F08F3.4	166.368	-3.42265	0.364064	-9.40125	5.39204e-21	1.3759e-19
WBGene00015956	C18B2.5	2776.23	-3.41581	0.259895	-13.143	1.86556e-39	1.10864e-37
WBGene00206373	C27A2.12	45.4741	-3.41543	0.570107	-5.99086	2.08733e-09	1.98222e-08
WBGene00009573	F40E10.5	582.447	-3.41488	0.316723	-10.7819	4.19066e-27	1.46684e-25
WBGene00007800	C29A12.6	462.276	-3.41369	0.280524	-12.169	4.54881e-34	2.18001e-32
WBGene00044724	R02E4.3	267.542	-3.41232	0.302174	-11.2926	1.42825e-29	5.56768e-28
WBGene00016259	C30F8.3	125.74	-3.40728	0.539366	-6.3172	2.66352e-10	2.86056e-09
WBGene00007807	C29F3.7	322.656	-3.40622	0.375636	-9.06786	1.21372e-19	2.80774e-18
WBGene00020551	T17H7.7	898.949	-3.40513	0.266339	-12.7849	1.99022e-37	1.1088e-35
WBGene00044382	Y14H12A.2	20.7909	-3.40335	0.806629	-4.21922	2.45146e-05	0.000123413
WBGene00014178	ZK1010.4	80.9438	-3.39759	0.535006	-6.35057	2.14522e-10	2.33011e-09
WBGene00015646	mlt-10	2499.49	-3.39342	0.20151	-16.8399	1.24359e-63	1.49802e-61
WBGene00022515	ttr-48	909.632	-3.38255	0.228911	-14.7767	2.07135e-49	1.79844e-47
WBGene00013103	Y51H4A.7	285.725	-3.38212	0.42615	-7.93644	2.08059e-15	3.60357e-14
WBGene00045146	Y41E3.22	20.6332	-3.36834	0.858231	-3.92474	8.6822e-05	0.00038852
WBGene00018992	trpl-1	128.005	-3.36226	0.351672	-9.56079	1.16856e-21	3.13752e-20
WBGene00009226	cyp-37B1	167.605	-3.36156	0.353991	-9.49618	2.17735e-21	5.70849e-20
WBGene00000681	col-107	2537.7	-3.35117	0.228379	-14.6737	9.49759e-49	8.19305e-47
WBGene00010968	R01E6.2	98.7664	-3.35098	1.05867	-3.16528	0.00154934	0.00520076
WBGene00016431	C35A11.4	42.3943	-3.34881	0.675512	-4.95744	7.14288e-07	4.64305e-06
WBGene00022811	ZK721.4	22.6627	-3.33902	0.738407	-4.52192	6.12804e-06	3.46901e-05
WBGene00020277	T06A1.1	339.458	-3.33199	0.272118	-12.2446	1.79456e-34	8.72547e-33
WBGene00018951	F56C9.7	370.008	-3.32879	0.277683	-11.9877	4.12132e-33	1.91341e-31
WBGene00022382	Y94H6A.10	312.329	-3.32708	0.286224	-11.624	3.11068e-31	1.32041e-29
WBGene00009561	F39D8.3	218.177	-3.32511	0.361316	-9.20278	3.48797e-20	8.37301e-19
WBGene00016600	ets-5	64.9084	-3.32457	0.541506	-6.1395	8.27829e-10	8.38553e-09
WBGene00015954	C18B2.3	212.92	-3.32423	0.402394	-8.26113	1.44299e-16	2.69097e-15
WBGene00000215	asp-2	1343.97	-3.30491	0.284842	-11.6026	3.9963e-31	1.68033e-29
WBGene00020497	T14A8.2	204.355	-3.2995	0.331604	-9.95014	2.51818e-23	7.35166e-22
WBGene00018100	math-26	119.042	-3.29463	0.374716	-8.79235	1.46465e-18	3.15361e-17
WBGene00022160	Y71G12B.25	6928.94	-3.28793	0.242096	-13.5811	5.18401e-42	3.5365e-40
WBGene00009408	F35C12.3	66.4565	-3.28565	0.449584	-7.3082	2.70737e-13	3.96063e-12
WBGene00015645	lips-7	126.366	-3.28275	0.407638	-8.05312	8.07123e-16	1.43702e-14
WBGene00002057	ifd-1	1589.54	-3.27625	0.170251	-19.2436	1.59652e-82	3.13927e-80
WBGene00017438	F13H8.5	1512.4	-3.27509	0.314496	-10.4138	2.14589e-25	6.89729e-24
WBGene00007891	C33B4.2	33.7878	-3.27305	0.629086	-5.20286	1.9624e-07	1.40167e-06
WBGene00019617	ctsa-2	6854.93	-3.26883	0.255543	-12.7917	1.82426e-37	1.02059e-35
WBGene00006636	tsp-10	42.7105	-3.26701	0.630427	-5.18221	2.19271e-07	1.55372e-06
WBGene00003642	nhr-52	19.2671	-3.2661	0.779831	-4.18821	2.81163e-05	0.000140225
WBGene00014091	ZK822.4	105.48	-3.2637	0.478598	-6.8193	9.14867e-12	1.14646e-10
WBGene00000603	col-14	1558.77	-3.2592	0.255605	-12.7509	3.08049e-37	1.68809e-35
WBGene00000034	abu-11	573.047	-3.25917	0.323483	-10.0752	7.10831e-24	2.16012e-22
WBGene00006915	vha-6	2582.5	-3.24924	0.176273	-18.433	7.14024e-76	1.1934e-73
WBGene00016722	C46G7.2	2347.82	-3.2433	0.257004	-12.6196	1.64608e-36	8.73403e-35
WBGene00010060	F54E4.4	52.5666	-3.23493	0.655805	-4.93276	8.10751e-07	5.23445e-06
WBGene00015334	sup-18	92.5883	-3.23276	0.488428	-6.61871	3.62339e-11	4.24986e-10
WBGene00077691	T06E4.14	61.1501	-3.22298	0.5868	-5.49247	3.96348e-08	3.14701e-07
WBGene00010723	cpg-7	159.767	-3.21587	0.390127	-8.24314	1.67751e-16	3.11095e-15
WBGene00012607	Y38F1A.4	98.8052	-3.20952	0.397324	-8.07784	6.59223e-16	1.17841e-14
WBGene00019435	K06A9.1	3826.58	-3.20778	0.288352	-11.1245	9.52922e-29	3.51976e-27
WBGene00000616	col-39	425.056	-3.20681	0.403078	-7.95581	1.77962e-15	3.09432e-14
WBGene00007722	C25D7.15	32.8268	-3.20634	0.665263	-4.81966	1.43804e-06	8.95162e-06
WBGene00219208	B0365.9	291.815	-3.20529	0.320128	-10.0125	1.34247e-23	4.01571e-22
WBGene00020887	hic-1	45.087	-3.2052	0.537321	-5.96515	2.44415e-09	2.30308e-08
WBGene00021157	Y4C6B.3	30.6799	-3.19861	0.626312	-5.10705	3.27226e-07	2.26702e-06
WBGene00011004	R04B5.6	133.912	-3.19463	0.41499	-7.69809	1.38119e-14	2.23043e-13
WBGene00015426	C04E6.12	85.4135	-3.19064	0.57647	-5.53479	3.11596e-08	2.51591e-07
WBGene00008044	C40H1.9	30.2793	-3.18987	0.636672	-5.01023	5.43644e-07	3.62909e-06
WBGene00020559	best-17	44.6315	-3.18985	0.607883	-5.24748	1.54194e-07	1.1205e-06
WBGene00044227	C07A9.13	93.1045	-3.18856	0.396967	-8.03229	9.56725e-16	1.69435e-14
WBGene00016234	C29G2.6	677.054	-3.17566	0.251696	-12.6171	1.70012e-36	8.98513e-35
WBGene00015449	ugt-63	154.421	-3.17391	0.341255	-9.30071	1.3951e-20	3.47372e-19
WBGene00018288	F41E6.7	40.9328	-3.16973	0.577726	-5.48656	4.0984e-08	3.24642e-07
WBGene00004993	spp-8	231.022	-3.16806	0.268667	-11.7917	4.30515e-32	1.9188e-30
WBGene00006952	wrt-6	1343.92	-3.16457	0.244678	-12.9336	2.90817e-38	1.68334e-36
WBGene00007455	ugt-22	805.101	-3.14696	0.227116	-13.8562	1.16763e-43	8.43909e-42
WBGene00003890	osm-10	85.0169	-3.1429	0.495852	-6.33838	2.32191e-10	2.51386e-09
WBGene00020396	T10B5.10	219.878	-3.14106	0.306378	-10.2522	1.15632e-24	3.61242e-23
WBGene00021850	Y54F10AM.6	1098.26	-3.13966	0.247262	-12.6977	6.08813e-37	3.30912e-35
WBGene00013852	hhat-1	3009.08	-3.13872	0.259849	-12.079	1.36374e-33	6.4433e-32
WBGene00007823	C30H6.5	88.5179	-3.13503	0.447856	-7.00009	2.55802e-12	3.38982e-11
WBGene00020455	fbxa-59	78.0694	-3.13402	0.519207	-6.03618	1.57808e-09	1.53013e-08
WBGene00008604	F09B9.5	42.3984	-3.13327	0.527157	-5.9437	2.78653e-09	2.60368e-08
WBGene00003554	nas-38	107.152	-3.13092	0.494807	-6.32755	2.49082e-10	2.68804e-09
WBGene00012940	Y47D3B.3	52.1373	-3.13081	0.595148	-5.26056	1.4362e-07	1.04879e-06
WBGene00001984	hog-1	188.076	-3.12986	0.302537	-10.3454	4.39209e-25	1.39163e-23
WBGene00010321	F59B10.5	73.2509	-3.12952	0.510052	-6.13568	8.47968e-10	8.55712e-09
WBGene00016568	C41G11.1	64.5129	-3.12349	0.455162	-6.86237	6.77256e-12	8.59164e-11
WBGene00003178	mec-17	362.051	-3.12039	0.360864	-8.64701	5.28666e-18	1.09086e-16
WBGene00016738	C47D2.1	31.0271	-3.10702	0.631265	-4.9219	8.57099e-07	5.51239e-06
WBGene00000169	aqp-1	69.1357	-3.10653	0.454516	-6.83481	8.21112e-12	1.03479e-10
WBGene00008851	F15B9.8	2343.21	-3.10641	0.211706	-14.6732	9.56911e-49	8.20183e-47
WBGene00018377	hum-10	77.0878	-3.10469	0.545978	-5.68647	1.29695e-08	1.11021e-07
WBGene00003877	pept-1	2689.77	-3.09408	0.219788	-14.0776	5.21591e-45	4.00815e-43
WBGene00015546	C06G1.2	449.403	-3.09335	0.355549	-8.70019	3.31328e-18	6.98769e-17
WBGene00015545	C06G1.1	1883.82	-3.08726	0.195932	-15.7568	6.16625e-56	6.19917e-54
WBGene00004999	spp-14	138.671	-3.08483	0.333069	-9.26185	2.00925e-20	4.93854e-19
WBGene00019489	K07E1.1	40.1551	-3.07919	0.836113	-3.68275	0.000230732	0.000942886
WBGene00050939	C05G5.7	42.8629	-3.07644	0.646615	-4.75775	1.95758e-06	1.19848e-05
WBGene00007174	mboa-1	350.078	-3.07322	0.295293	-10.4074	2.29502e-25	7.35894e-24
WBGene00077491	K08H10.10	52.756	-3.06934	0.589648	-5.20538	1.93605e-07	1.38433e-06
WBGene00009259	hpo-34	6003.99	-3.0663	0.214742	-14.279	2.9565e-46	2.35306e-44
WBGene00000447	ceh-24	75.5298	-3.0659	0.455706	-6.7278	1.72244e-11	2.09752e-10
WBGene00007775	acd-3	41.4003	-3.06446	0.519862	-5.89477	3.75211e-09	3.4457e-08
WBGene00007857	C31H5.6	27.9975	-3.05933	0.862493	-3.54708	0.000389523	0.00152023
WBGene00020250	T05C1.3	142.9	-3.0508	0.477082	-6.39472	1.60841e-10	1.76714e-09
WBGene00015781	C14F11.6	2611.54	-3.04625	0.188634	-16.149	1.1539e-58	1.2245e-56
WBGene00019155	H04M03.11	23.532	-3.04438	0.753008	-4.04295	5.27819e-05	0.00024859
WBGene00010811	hmit-1.3	335.732	-3.03657	0.269783	-11.2556	2.17279e-29	8.34838e-28
WBGene00012853	Y44A6D.2	177.63	-3.03625	0.31889	-9.5213	1.71034e-21	4.53749e-20
WBGene00016468	C36B7.5	173.579	-3.03539	0.374435	-8.10659	5.20617e-16	9.35641e-15
WBGene00044663	F26G1.10	40.476	-3.03289	0.524326	-5.78435	7.27921e-09	6.43719e-08
WBGene00044898	let-383	452.274	-3.0322	0.256352	-11.8283	2.78836e-32	1.25532e-30
WBGene00013896	ZC443.1	256.502	-3.03148	0.433014	-7.00087	2.54372e-12	3.37421e-11
WBGene00013542	lron-12	256.538	-3.03063	0.300887	-10.0723	7.32149e-24	2.21483e-22
WBGene00018986	cdo-1	35.5348	-3.02097	0.594384	-5.08252	3.72458e-07	2.55523e-06
WBGene00003736	nhx-9	882.426	-3.0148	0.245881	-12.2612	1.46328e-34	7.16686e-33
WBGene00020069	R13H7.2	92.5075	-3.00752	0.426463	-7.05224	1.76063e-12	2.38033e-11
WBGene00010328	F59C6.11	123.154	-3.00145	0.39499	-7.5988	2.98887e-14	4.71831e-13
WBGene00002142	inx-20	114.882	-2.9978	0.448548	-6.68334	2.33559e-11	2.80083e-10
WBGene00010086	F55B11.4	71.7699	-2.98978	0.442241	-6.76051	1.37504e-11	1.68831e-10
WBGene00011803	T16G12.1	1462.27	-2.98938	0.222009	-13.4652	2.50747e-41	1.6435e-39
WBGene00004020	pho-1	172.204	-2.98826	0.356732	-8.37675	5.44115e-17	1.04984e-15
WBGene00006782	unc-46	32.8149	-2.98494	0.810319	-3.68367	0.000229904	0.000939787
WBGene00000645	col-69	97.3732	-2.9845	0.406319	-7.34523	2.05412e-13	3.03487e-12
WBGene00007424	C08B6.3	50.5403	-2.98398	0.474129	-6.29361	3.10171e-10	3.30726e-09
WBGene00003745	nlp-7	64.7025	-2.98195	0.485919	-6.13671	8.4246e-10	8.50796e-09
WBGene00001462	flp-19	86.236	-2.98048	0.482617	-6.17566	6.5888e-10	6.71997e-09
WBGene00001707	grh-1	604.688	-2.98014	0.264744	-11.2567	2.14698e-29	8.27298e-28
WBGene00017591	F19C7.1	1477.81	-2.97862	0.218273	-13.6463	2.12254e-42	1.47815e-40
WBGene00010150	F56D5.6	583.967	-2.97733	0.233369	-12.7581	2.81141e-37	1.54697e-35
WBGene00016219	pals-24	44.3972	-2.97593	0.593618	-5.01321	5.35285e-07	3.57864e-06
WBGene00012035	T26C5.5	68.193	-2.97396	0.495599	-6.00075	1.96412e-09	1.88125e-08
WBGene00001362	exc-1	54.5891	-2.97071	0.527808	-5.62839	1.81902e-08	1.52681e-07
WBGene00014666	C05D12.3	472.907	-2.97066	0.28001	-10.6092	2.70196e-26	9.14629e-25
WBGene00004309	rap-3	43.5659	-2.96796	0.616663	-4.81294	1.48729e-06	9.24099e-06
WBGene00006531	tba-5	71.4313	-2.96723	0.413873	-7.16943	7.53082e-13	1.05109e-11
WBGene00011337	T01G1.2	169.062	-2.96514	0.352065	-8.42214	3.69664e-17	7.20521e-16
WBGene00196578	F55C12.10	22.8165	-2.96392	0.814589	-3.63854	0.000274189	0.00110394
WBGene00007006	npr-3	22.1486	-2.96129	0.701522	-4.22124	2.42958e-05	0.00012245
WBGene00016314	C32D5.6	41.3798	-2.95913	0.544472	-5.43486	5.48397e-08	4.24679e-07
WBGene00011272	dtmk-1	3966.55	-2.95767	0.168783	-17.5235	9.47775e-69	1.34816e-66
WBGene00002272	lec-9	233.376	-2.95496	0.36246	-8.15251	3.56457e-16	6.467e-15
WBGene00011238	ugt-59	64.1379	-2.94214	0.454346	-6.47555	9.44682e-11	1.0579e-09
WBGene00013497	hex-5	202.204	-2.93901	0.374507	-7.84767	4.23836e-15	7.17356e-14
WBGene00044385	F59A6.10	15.7591	-2.93664	0.910121	-3.22665	0.00125248	0.00429281
WBGene00001450	flp-7	29.3236	-2.92912	0.716714	-4.08687	4.37229e-05	0.000209091
WBGene00009315	F32B4.5	56.4286	-2.92673	0.589099	-4.96814	6.75985e-07	4.41985e-06
WBGene00016532	C39D10.5	68.9641	-2.92258	0.530231	-5.51191	3.54965e-08	2.84376e-07
WBGene00271777	Y48G8AR.8	26.4998	-2.92205	0.715147	-4.08594	4.3899e-05	0.000209783
WBGene00044530	F32D1.11	147.683	-2.92176	0.384114	-7.60649	2.81648e-14	4.45144e-13
WBGene00020343	acs-3	399.455	-2.91055	0.227775	-12.7782	2.17129e-37	1.20466e-35
WBGene00011315	mbr-1	56.9454	-2.91002	0.514567	-5.65527	1.55598e-08	1.31844e-07
WBGene00011077	R07B1.5	68.0254	-2.90592	0.545254	-5.32947	9.85011e-08	7.32755e-07
WBGene00004153	pqn-71	153.908	-2.90459	0.475209	-6.11223	9.82508e-10	9.84054e-09
WBGene00016795	C49H3.12	16.5154	-2.90399	0.844647	-3.43811	0.00058579	0.002183
WBGene00013292	Y57G11A.4	81.9228	-2.89962	0.427213	-6.7873	1.14249e-11	1.41578e-10
WBGene00001099	dsc-4	2585.51	-2.88861	0.205697	-14.043	8.50385e-45	6.42401e-43
WBGene00022649	ZK84.1	2585.51	-2.88358	0.331866	-8.689	3.65633e-18	7.66282e-17
WBGene00019424	aptf-1	62.5613	-2.87986	0.417009	-6.906	4.98513e-12	6.42779e-11
WBGene00000601	col-12	257.627	-2.87793	0.400346	-7.18861	6.5453e-13	9.1787e-12
WBGene00012256	lpr-5	9109.88	-2.87744	0.192169	-14.9735	1.09415e-50	9.81867e-49
WBGene00017489	F15E6.9	56.3568	-2.87727	0.549599	-5.23521	1.64797e-07	1.19108e-06
WBGene00009396	clec-65	75.5824	-2.8769	0.395766	-7.26919	3.61659e-13	5.23916e-12
WBGene00017721	F22F7.3	171.309	-2.8731	0.37248	-7.71343	1.22479e-14	1.99264e-13
WBGene00000302	cav-2	410.791	-2.86918	0.269013	-10.6656	1.47453e-26	5.06837e-25
WBGene00013426	Y66A7A.7	111.891	-2.86551	0.365723	-7.8352	4.68096e-15	7.88276e-14
WBGene00012744	Y40H7A.4	29.1366	-2.86407	0.645487	-4.43706	9.1196e-06	5.00567e-05
WBGene00018113	F36H9.5	483.686	-2.86332	0.339928	-8.4233	3.66032e-17	7.14484e-16
WBGene00000047	acr-8	316.117	-2.86143	0.25961	-11.022	2.99256e-28	1.08145e-26
WBGene00022155	Y71G12B.17	321.236	-2.85621	0.33426	-8.54488	1.28669e-17	2.58323e-16
WBGene00001446	flp-3	19.2519	-2.8548	0.757252	-3.76995	0.000163278	0.00068979
WBGene00001476	fmo-1	761.75	-2.84797	0.239029	-11.9148	9.91457e-33	4.55559e-31
WBGene00008292	C54C8.4	53.9652	-2.84774	0.463866	-6.13915	8.2962e-10	8.39731e-09
WBGene00011587	anp-1	509.084	-2.84711	0.211898	-13.4363	3.70609e-41	2.40554e-39
WBGene00004944	sol-1	122.975	-2.84685	0.345704	-8.23492	1.79684e-16	3.32763e-15
WBGene00044792	F59C6.14	49.7449	-2.84499	0.607953	-4.67963	2.87399e-06	1.70792e-05
WBGene00017430	bcl-11	5064.68	-2.84494	0.27179	-10.4674	1.21957e-25	3.95797e-24
WBGene00001613	glr-2	111.352	-2.84317	0.502554	-5.65744	1.5365e-08	1.30359e-07
WBGene00019540	K08D12.6	233.261	-2.8413	0.797413	-3.56314	0.00036644	0.00143643
WBGene00011718	T11G6.3	31.7258	-2.83891	0.684257	-4.14889	3.34085e-05	0.000163748
WBGene00008891	clec-42	47.7298	-2.83825	0.741555	-3.82743	0.000129488	0.000557073
WBGene00018036	F35C8.5	35.7888	-2.83792	0.552986	-5.13199	2.86696e-07	2.00179e-06
WBGene00017266	F08F3.10	151.905	-2.83661	0.302617	-9.37359	7.0105e-21	1.77533e-19
WBGene00015823	C16B8.3	152.558	-2.83347	0.398768	-7.10555	1.19846e-12	1.64186e-11
WBGene00008499	cyp-37A1	123.72	-2.82791	0.359349	-7.86955	3.55926e-15	6.07802e-14
WBGene00018307	dyla-1	24.4885	-2.8279	0.69079	-4.09372	4.24513e-05	0.000203447
WBGene00005724	srv-13	93.483	-2.81865	0.403189	-6.99089	2.73155e-12	3.6162e-11
WBGene00007592	C14H10.2	3303.84	-2.81603	0.163344	-17.2399	1.33313e-66	1.76488e-64
WBGene00000664	col-89	128.793	-2.81474	0.400927	-7.02058	2.20955e-12	2.95144e-11
WBGene00013331	Y57G11C.42	349.757	-2.81262	0.286769	-9.80796	1.04051e-22	2.95385e-21
WBGene00001113	dur-1	421.283	-2.81197	0.339939	-8.27198	1.31756e-16	2.47084e-15
WBGene00000521	cky-1	865.017	-2.80988	0.269271	-10.4351	1.71359e-25	5.52105e-24
WBGene00004234	ptr-20	350.69	-2.8009	0.290018	-9.65765	4.56197e-22	1.25253e-20
WBGene00044401	Y55B1BR.6	102.493	-2.80064	0.379647	-7.37696	1.61944e-13	2.40061e-12
WBGene00015716	sox-4	135.736	-2.80054	0.329561	-8.49778	1.93247e-17	3.82235e-16
WBGene00020192	T03F1.11	98.7968	-2.80045	0.533516	-5.24904	1.52893e-07	1.11165e-06
WBGene00009901	F49E12.8	47.3775	-2.80006	0.550681	-5.08472	3.68162e-07	2.53095e-06
WBGene00000963	dhp-1	340.036	-2.78895	0.243502	-11.4535	2.25862e-30	9.17932e-29
WBGene00010774	K11E4.2	118.512	-2.7887	0.354614	-7.86403	3.71982e-15	6.32795e-14
WBGene00249817	F42G8.19	58.2456	-2.78746	0.446829	-6.23831	4.42325e-10	4.59901e-09
WBGene00015622	C09B8.3	82.2958	-2.78549	0.400003	-6.96368	3.31506e-12	4.35419e-11
WBGene00018829	F54E7.6	34.8081	-2.78504	0.693599	-4.01534	5.93593e-05	0.000275875
WBGene00018726	F53A9.3	60.6028	-2.77873	0.513994	-5.40615	6.43941e-08	4.93983e-07
WBGene00016130	C26B2.8	309.92	-2.77834	0.338628	-8.20468	2.31212e-16	4.24662e-15
WBGene00011948	rocf-1	5159.01	-2.77661	0.21594	-12.8582	7.73249e-38	4.39962e-36
WBGene00003075	lrx-1	408.842	-2.77632	0.208697	-13.3031	2.22174e-40	1.38172e-38
WBGene00011656	oac-45	25.7349	-2.77351	0.77193	-3.59295	0.000326957	0.00129648
WBGene00007474	C08H9.15	345.597	-2.77327	0.305473	-9.07859	1.09993e-19	2.54891e-18
WBGene00006589	tnt-4	1968.65	-2.77194	0.278797	-9.94252	2.71862e-23	7.88518e-22
WBGene00050461	21ur-3019	24.4387	-2.77127	0.721594	-3.84048	0.000122795	0.000532183
WBGene00003760	nlp-22	25.2045	-2.77106	0.672299	-4.12176	3.75987e-05	0.000181739
WBGene00022413	Y102A11A.3	914.196	-2.77073	0.223391	-12.4031	2.51529e-35	1.28366e-33
WBGene00003057	lon-3	346.562	-2.77	0.236707	-11.7022	1.24196e-31	5.37421e-30
WBGene00016721	C46G7.1	168.313	-2.76242	0.381635	-7.23837	4.54095e-13	6.47994e-12
WBGene00007743	C26C6.9	152.717	-2.7616	0.29934	-9.22563	2.81897e-20	6.816e-19
WBGene00011877	T21B4.3	41.8176	-2.76146	0.604792	-4.56596	4.97208e-06	2.85574e-05
WBGene00011112	R07E5.4	222.977	-2.76095	0.381779	-7.2318	4.76623e-13	6.78692e-12
WBGene00017862	not found	29.1379	-2.75988	0.618551	-4.46185	8.12551e-06	4.48766e-05
WBGene00004267	rab-3	569.428	-2.75698	0.27377	-10.0704	7.46547e-24	2.25329e-22
WBGene00016938	C54H2.4	43.5799	-2.75613	0.547941	-5.02997	4.90554e-07	3.30604e-06
WBGene00016379	C33H5.13	55.805	-2.74914	0.648181	-4.24132	2.22213e-05	0.000112974
WBGene00009453	F36A2.3	218.546	-2.74612	0.280365	-9.79483	1.18491e-22	3.34957e-21
WBGene00017783	F25E5.2	58.7661	-2.7403	0.548363	-4.99724	5.81571e-07	3.85723e-06
WBGene00019234	ugt-8	39.6189	-2.73814	0.565412	-4.84273	1.28069e-06	8.05084e-06
WBGene00003097	lys-8	259.861	-2.73737	0.297491	-9.2015	3.52977e-20	8.45039e-19
WBGene00009292	F31D4.5	6520.16	-2.73445	0.246458	-11.095	1.32711e-28	4.87495e-27
WBGene00001694	grd-5	296.875	-2.71672	0.381332	-7.12428	1.04625e-12	1.4437e-11
WBGene00022261	clec-210	15.6143	-2.71254	0.790855	-3.42988	0.000603838	0.00224338
WBGene00007552	C13C12.2	662.333	-2.70756	0.239038	-11.3269	9.65724e-30	3.82033e-28
WBGene00008205	sams-1	9483.28	-2.70656	0.287176	-9.42474	4.31183e-21	1.10659e-19
WBGene00021942	madf-1	225.106	-2.70628	0.271445	-9.96992	2.06397e-23	6.1056e-22
WBGene00017429	F13D11.4	573.972	-2.70169	0.239462	-11.2823	1.6043e-29	6.23579e-28
WBGene00008879	F16B12.1	10.4005	-2.70093	0.949014	-2.84604	0.00442669	0.0131328
WBGene00012763	atln-2	93.9347	-2.70043	0.35889	-7.52439	5.29679e-14	8.20665e-13
WBGene00007751	C26G2.2	374.814	-2.6997	0.273576	-9.86819	5.71863e-23	1.64438e-21
WBGene00020340	T08B1.1	349.347	-2.69801	0.345137	-7.81723	5.39999e-15	9.04803e-14
WBGene00013901	ugt-16	98.9531	-2.69752	0.41891	-6.43939	1.19954e-10	1.33437e-09
WBGene00002259	lbp-7	80.9123	-2.69256	0.491094	-5.48277	4.18717e-08	3.3089e-07
WBGene00017400	stg-2	26.3976	-2.69069	0.754547	-3.56597	0.000362516	0.0014223
WBGene00001535	gcy-8	58.0451	-2.68956	0.536476	-5.01338	5.34826e-07	3.57737e-06
WBGene00000950	deg-1	175.745	-2.68696	0.325458	-8.25594	1.50714e-16	2.79889e-15
WBGene00016958	ilys-4	220.939	-2.67829	0.314055	-8.52809	1.48787e-17	2.97819e-16
WBGene00018627	F49D11.3	25.3841	-2.67254	0.847132	-3.1548	0.00160606	0.00537134
WBGene00012253	clec-50	317.194	-2.67138	0.27328	-9.77525	1.43806e-22	4.03957e-21
WBGene00022503	ZC13.2	103.552	-2.67032	0.414522	-6.44193	1.17966e-10	1.31444e-09
WBGene00044150	VB0395L.1	46.6034	-2.66854	0.607982	-4.38918	1.13781e-05	6.13205e-05
WBGene00017991	clec-180	3790.01	-2.66746	0.232699	-11.4631	2.02078e-30	8.26296e-29
WBGene00003549	nas-31	23.6033	-2.66708	0.797856	-3.3428	0.000829366	0.00296986
WBGene00002273	lec-10	881.241	-2.66478	0.364493	-7.31093	2.65307e-13	3.88971e-12
WBGene00011537	T06E4.10	32.6814	-2.66196	0.574078	-4.63692	3.53636e-06	2.07753e-05
WBGene00017306	F09F9.1	122.819	-2.66152	0.337061	-7.89627	2.87372e-15	4.93255e-14
WBGene00004174	abu-14	9460.96	-2.66077	0.236478	-11.2517	2.27278e-29	8.70755e-28
WBGene00020976	oac-51	1227	-2.65779	0.183452	-14.4877	1.44951e-47	1.20382e-45
WBGene00011888	cutl-15	545.238	-2.65716	0.231686	-11.4688	1.89294e-30	7.76394e-29
WBGene00021325	Y34B4A.9	652.869	-2.65701	0.29428	-9.02885	1.7348e-19	3.97671e-18
WBGene00015609	math-4	69.4118	-2.65142	0.514309	-5.1553	2.53223e-07	1.78186e-06
WBGene00014206	nit-1	52.5305	-2.65066	0.493889	-5.36692	8.00908e-08	6.04342e-07
WBGene00020788	nep-22	980.34	-2.64716	0.241276	-10.9715	5.24118e-28	1.88387e-26
WBGene00021911	affl-1	39.1075	-2.6444	0.714616	-3.70046	0.000215212	0.000885961
WBGene00020971	W03B1.1	87.0175	-2.64392	0.485623	-5.44438	5.1986e-08	4.04837e-07
WBGene00008593	clec-227	41.355	-2.64375	0.528856	-4.999	5.76295e-07	3.82984e-06
WBGene00010750	K10D11.6	12.6839	-2.64181	0.914491	-2.88883	0.00386681	0.0117081
WBGene00020662	T21H3.1	78.3495	-2.6407	0.462234	-5.7129	1.11068e-08	9.58739e-08
WBGene00010509	K02E2.8	24.3531	-2.64002	0.646728	-4.08212	4.46273e-05	0.000212883
WBGene00015544	C06E8.5	140.759	-2.63144	0.483493	-5.44255	5.2522e-08	4.08298e-07
WBGene00018641	F49E10.4	174.349	-2.62979	0.322567	-8.15268	3.55947e-16	6.46654e-15
WBGene00004264	qua-1	2147.21	-2.62686	0.244981	-10.7227	7.96404e-27	2.75874e-25
WBGene00018174	F38B6.4	65.5432	-2.62584	0.563979	-4.65591	3.22551e-06	1.9058e-05
WBGene00001719	grl-10	1451.03	-2.62185	0.217381	-12.0611	1.69573e-33	7.98365e-32
WBGene00007185	nlp-36	410.269	-2.6151	0.24638	-10.6141	2.56349e-26	8.6996e-25
WBGene00008603	F09B9.4	431.357	-2.61373	0.210744	-12.4024	2.53742e-35	1.29003e-33
WBGene00006587	tnt-2	460.221	-2.60831	0.36164	-7.21246	5.49507e-13	7.78333e-12
WBGene00001403	fbl-1	622.607	-2.60324	0.207631	-12.5378	4.63765e-36	2.43176e-34
WBGene00019017	F57F4.4	8567.47	-2.6015	0.241051	-10.7923	3.74208e-27	1.31326e-25
WBGene00000672	col-97	2478.92	-2.59897	0.222807	-11.6647	1.93131e-31	8.27679e-30
WBGene00020222	fut-6	70.6454	-2.59754	0.408592	-6.35728	2.05361e-10	2.23971e-09
WBGene00011266	R13H4.8	145.303	-2.59558	0.443043	-5.85852	4.66999e-09	4.2449e-08
WBGene00012670	Y39B6A.8	132.625	-2.5943	0.355618	-7.29517	2.98283e-13	4.35408e-12
WBGene00010349	dyf-18	64.8986	-2.5898	0.451481	-5.73622	9.68105e-09	8.44392e-08
WBGene00001710	grl-1	174.942	-2.5896	0.454246	-5.70086	1.19202e-08	1.02433e-07
WBGene00017073	D2096.6	617.78	-2.58863	0.373988	-6.9217	4.46261e-12	5.79879e-11
WBGene00009530	F38B2.3	30.9353	-2.58766	0.611874	-4.22907	2.34654e-05	0.000118667
WBGene00009144	del-3	424.562	-2.58532	0.295513	-8.74858	2.16063e-18	4.60763e-17
WBGene00000428	ceh-1	10.6556	-2.58204	1.00869	-2.5598	0.0104732	0.0276863
WBGene00197691	K08F8.9	12.6061	-2.58158	0.912499	-2.82913	0.00466753	0.0137678
WBGene00010605	K06G5.1	2415.64	-2.58126	0.233923	-11.0347	2.60028e-28	9.42232e-27
WBGene00022614	ZC449.4	122.06	-2.5801	0.334645	-7.70995	1.25867e-14	2.04244e-13
WBGene00018470	F45E4.5	30.0577	-2.57995	0.592165	-4.35681	1.31974e-05	7.04016e-05
WBGene00013387	Y62F5A.9	197.003	-2.57979	0.360507	-7.156	8.30656e-13	1.15574e-11
WBGene00017597	F19C7.8	1118.59	-2.57459	0.199023	-12.9362	2.81317e-38	1.64257e-36
WBGene00044623	bus-8	4353.1	-2.56819	0.217888	-11.7868	4.56715e-32	2.02881e-30
WBGene00077697	F58E6.13	735.469	-2.56072	0.191775	-13.3528	1.14128e-40	7.23228e-39
WBGene00020571	lpr-7	786.089	-2.5604	0.205856	-12.4379	1.62825e-35	8.40594e-34
WBGene00044445	C02F5.14	99.2881	-2.55887	0.4668	-5.48173	4.21197e-08	3.32653e-07
WBGene00016328	pde-5	140.871	-2.55819	0.374216	-6.83612	8.13686e-12	1.0264e-10
WBGene00009318	F32B4.8	344.344	-2.55778	0.261616	-9.77682	1.41584e-22	3.9855e-21
WBGene00219612	linc-153	10.5906	-2.5549	1.08793	-2.3484	0.0188541	0.0459361
WBGene00013905	ugt-4	36.5457	-2.55467	0.773282	-3.30368	0.000954252	0.00336924
WBGene00000902	daf-6	605.955	-2.55352	0.225584	-11.3196	1.04923e-29	4.12626e-28
WBGene00019934	R07C12.4	21.5959	-2.55265	0.68549	-3.72383	0.000196222	0.000814808
WBGene00008746	F13E6.2	142.456	-2.55034	0.372412	-6.84816	7.48068e-12	9.47199e-11
WBGene00003003	lin-14	4367.79	-2.54425	0.227048	-11.2058	3.81998e-29	1.44366e-27
WBGene00011073	R07A4.2	32.1601	-2.54165	0.57841	-4.39419	1.11185e-05	6.00669e-05
WBGene00009355	F33A8.7	1096.06	-2.54137	0.229473	-11.0748	1.66262e-28	6.07403e-27
WBGene00007908	C34B4.3	51.1535	-2.54036	0.531588	-4.77883	1.76321e-06	1.08495e-05
WBGene00008254	C51E3.9	127.132	-2.53834	0.405813	-6.25495	3.97641e-10	4.1603e-09
WBGene00011217	R10E11.5	102.643	-2.53517	0.460431	-5.50608	3.66917e-08	2.92724e-07
WBGene00011400	T03F6.4	70.9286	-2.53413	0.503972	-5.02832	4.94807e-07	3.33135e-06
WBGene00020256	T05C3.6	164.507	-2.53377	0.332849	-7.61238	2.69101e-14	4.27334e-13
WBGene00009218	acs-20	2159.51	-2.53004	0.196618	-12.8678	6.83241e-38	3.90411e-36
WBGene00011222	R10H10.3	120.251	-2.52754	0.381691	-6.62196	3.54459e-11	4.16474e-10
WBGene00019904	twk-49	137.518	-2.52717	0.33219	-7.60761	2.79218e-14	4.41825e-13
WBGene00220094	T25C12.12	292.636	-2.52596	0.766382	-3.29595	0.000980889	0.00345144
WBGene00000633	col-56	68.5297	-2.52518	0.40667	-6.20941	5.31827e-10	5.49117e-09
WBGene00007420	C07E3.10	232.489	-2.52494	0.308379	-8.18778	2.66095e-16	4.86724e-15
WBGene00017067	not found	98.4934	-2.52374	0.429464	-5.87648	4.1908e-09	3.82493e-08
WBGene00022417	Y102A11A.7	46.2264	-2.52319	0.531757	-4.74501	2.08492e-06	1.26946e-05
WBGene00011545	T06G6.3	73.8457	-2.52181	0.525556	-4.79837	1.59966e-06	9.87945e-06
WBGene00022353	pals-18	33.2041	-2.51772	0.5833	-4.31635	1.58632e-05	8.30489e-05
WBGene00001621	glt-3	117.419	-2.51769	0.32645	-7.71235	1.23518e-14	2.00676e-13
WBGene00000907	daf-11	149.72	-2.51718	0.394541	-6.38002	1.77062e-10	1.94057e-09
WBGene00007903	lgc-21	707.812	-2.5141	0.205309	-12.2454	1.77714e-34	8.67232e-33
WBGene00008542	scav-6	491.093	-2.51156	0.214054	-11.7333	8.6006e-32	3.75812e-30
WBGene00013906	ugt-5	289.626	-2.50981	0.281872	-8.90406	5.38405e-19	1.18992e-17
WBGene00009529	F38B2.2	16.3601	-2.50922	0.822018	-3.05251	0.00226938	0.00731353
WBGene00001096	dsc-1	15.9754	-2.50864	0.829035	-3.02598	0.00247831	0.00789551
WBGene00001441	fkh-9	2600.85	-2.50784	0.261889	-9.57596	1.00918e-21	2.72602e-20
WBGene00000434	ceh-9	18.2592	-2.50694	0.79932	-3.13634	0.00171073	0.00569291
WBGene00003514	myo-2	5505.76	-2.50657	0.246514	-10.1681	2.75215e-24	8.49861e-23
WBGene00000775	cpin-1	388.264	-2.50628	0.351525	-7.12973	1.00569e-12	1.38916e-11
WBGene00015753	C14B9.3	398.026	-2.50084	0.25098	-9.96431	2.18387e-23	6.44604e-22
WBGene00020884	T28B4.1	155.528	-2.49954	0.318553	-7.84655	4.27625e-15	7.22853e-14
WBGene00013328	Y57G11C.39	99.6708	-2.49354	0.382411	-6.52057	7.00399e-11	7.93647e-10
WBGene00008496	F01D5.6	842.349	-2.48995	0.254407	-9.78728	1.2768e-22	3.6017e-21
WBGene00000753	col-180	153.612	-2.48988	0.33446	-7.44447	9.73322e-14	1.46888e-12
WBGene00001223	ehn-3	34.8088	-2.48858	0.549015	-4.5328	5.82074e-06	3.31188e-05
WBGene00015087	B0252.1	35.8134	-2.48811	0.726309	-3.42569	0.000613246	0.00227265
WBGene00019579	oac-57	14.9673	-2.4874	0.983299	-2.52964	0.0114178	0.0297656
WBGene00018027	F35A5.5	149.506	-2.47578	0.364372	-6.79466	1.08569e-11	1.34789e-10
WBGene00003860	oig-2	60.3013	-2.47412	0.52405	-4.72116	2.34499e-06	1.41942e-05
WBGene00015608	math-3	46.6777	-2.47374	0.597681	-4.1389	3.48976e-05	0.000170236
WBGene00195375	C34E7.6	36.0205	-2.46677	0.580464	-4.24965	2.14105e-05	0.000109351
WBGene00201207	Y71H9A.9	9.811	-2.46418	0.978411	-2.51855	0.0117839	0.0305947
WBGene00021322	Y34B4A.6	611.29	-2.45999	0.235447	-10.4482	1.49359e-25	4.82387e-24
WBGene00011796	T16G1.2	1334.01	-2.45723	0.300449	-8.17854	2.87305e-16	5.24087e-15
WBGene00011831	T19B10.2	6034.92	-2.45279	0.157577	-15.5656	1.2473e-54	1.2263e-52
WBGene00045198	K10D11.7	8.96799	-2.45261	0.993025	-2.46984	0.0135173	0.0344135
WBGene00014821	R10E8.7	54.0781	-2.44924	0.543871	-4.50334	6.6893e-06	3.75809e-05
WBGene00008965	mltn-10	41.4591	-2.44708	0.711173	-3.44091	0.000579763	0.00216355
WBGene00220093	T25C12.11	306.08	-2.44659	0.329349	-7.42857	1.09779e-13	1.64927e-12
WBGene00023407	cex-1	155.131	-2.44307	0.40168	-6.08213	1.186e-09	1.17206e-08
WBGene00002067	ifp-1	3139.39	-2.44155	0.172505	-14.1535	1.77726e-45	1.38162e-43
WBGene00000613	col-36	15.6593	-2.44152	0.821934	-2.97046	0.00297355	0.00928739
WBGene00022423	nhr-41	2516.02	-2.43788	0.18306	-13.3173	1.83542e-40	1.1468e-38
WBGene00009500	F36H2.3	923.928	-2.4357	0.177788	-13.7	1.01467e-42	7.14063e-41
WBGene00012875	Y45F10B.13	1059.89	-2.4344	0.259429	-9.38368	6.37106e-21	1.61953e-19
WBGene00001776	gst-28	46.2628	-2.43282	0.643098	-3.78298	0.000154964	0.000657994
WBGene00019359	not found	18.9423	-2.42296	0.871396	-2.78056	0.00542659	0.0156952
WBGene00000031	abu-8	438	-2.4229	0.32625	-7.42652	1.11496e-13	1.67319e-12
WBGene00001784	gst-36	264.747	-2.42163	0.2902	-8.34471	7.13889e-17	1.3695e-15
WBGene00011330	T01D3.6	1428.63	-2.41618	0.195551	-12.3558	4.53458e-35	2.26238e-33
WBGene00012134	T28F3.8	123.69	-2.41191	0.369038	-6.53566	6.33295e-11	7.24982e-10
WBGene00012391	Y6B3B.7	92.1206	-2.40741	0.455077	-5.29011	1.22243e-07	9.00556e-07
WBGene00017950	F31E3.2	284.253	-2.40205	0.276345	-8.69222	3.5541e-18	7.46026e-17
WBGene00003786	npa-1	6080.76	-2.4016	0.165661	-14.4971	1.26355e-47	1.05593e-45
WBGene00010442	bus-12	551.72	-2.39916	0.216099	-11.1021	1.22496e-28	4.51211e-27
WBGene00019565	cyp-35A3	592.205	-2.39706	0.209442	-11.445	2.49041e-30	1.00907e-28
WBGene00001053	dop-2	85.437	-2.39603	0.58768	-4.07711	4.55993e-05	0.000216978
WBGene00022783	tomm-7	65.9481	-2.39549	0.426723	-5.61368	1.98067e-08	1.65006e-07
WBGene00018040	F35D2.2	71.4824	-2.39314	0.433184	-5.52454	3.30345e-08	2.66247e-07
WBGene00012225	W03G11.3	337.469	-2.39063	0.282766	-8.45444	2.8042e-17	5.4978e-16
WBGene00008451	cest-3	77.4074	-2.39031	0.434914	-5.49605	3.88393e-08	3.08752e-07
WBGene00013965	ZK287.4	3868.79	-2.39028	0.27644	-8.64663	5.30417e-18	1.09279e-16
WBGene00197845	F55C12.12	6.98445	-2.38929	1.2018	-1.98809	0.0468022	0.0984569
WBGene00015107	viro-2	244.456	-2.38714	0.339888	-7.02331	2.16669e-12	2.89998e-11
WBGene00045336	R11D1.12	11.3044	-2.3841	0.895132	-2.66341	0.00773527	0.0212972
WBGene00004921	snt-1	102.42	-2.38371	0.455334	-5.23509	1.64906e-07	1.19123e-06
WBGene00022633	ZC581.3	436.464	-2.38055	0.311568	-7.64054	2.16305e-14	3.46373e-13
WBGene00009700	lurp-1	32.7333	-2.37866	0.544877	-4.3655	1.2683e-05	6.77796e-05
WBGene00015980	C18G1.1	82.3297	-2.37859	0.557681	-4.26514	1.99773e-05	0.000102461
WBGene00020487	T13C5.7	68.5639	-2.37789	0.41568	-5.72048	1.06226e-08	9.22304e-08
WBGene00020509	hex-1	169.846	-2.37386	0.300029	-7.9121	2.53073e-15	4.35501e-14
WBGene00008936	papl-1	96.6612	-2.37248	0.432816	-5.4815	4.2173e-08	3.32878e-07
WBGene00008482	cut-4	47.1939	-2.36782	0.539338	-4.39022	1.13234e-05	6.10503e-05
WBGene00018971	clec-67	175.484	-2.36491	0.387714	-6.09963	1.06311e-09	1.05765e-08
WBGene00013385	Y62E10A.19	465.663	-2.36403	0.242359	-9.75425	1.76904e-22	4.90743e-21
WBGene00016868	C52B9.8	25.0606	-2.36371	0.83502	-2.83072	0.0046443	0.0137114
WBGene00000845	cup-4	292.577	-2.36022	0.255042	-9.25424	2.15769e-20	5.29366e-19
WBGene00003104	mab-7	1147.05	-2.35727	0.229105	-10.289	7.89918e-25	2.48313e-23
WBGene00195785	C18B12.10	10.4042	-2.35309	0.998706	-2.35614	0.0184661	0.0451389
WBGene00007220	C01B9.1	190.168	-2.35289	0.306978	-7.66469	1.7927e-14	2.87758e-13
WBGene00011971	lron-9	3314.61	-2.3501	0.192235	-12.2251	2.28272e-34	1.09792e-32
WBGene00008296	cdr-2	112.851	-2.34902	0.46188	-5.08577	3.66134e-07	2.5183e-06
WBGene00019682	K12H4.7	480.295	-2.34803	0.251045	-9.35302	8.51795e-21	2.14085e-19
WBGene00000822	csq-1	2232.9	-2.34794	0.196121	-11.9719	4.98599e-33	2.30684e-31
WBGene00008194	C49C3.4	2479.53	-2.34638	0.203788	-11.5138	1.12365e-30	4.65151e-29
WBGene00019772	M04G7.1	61.0421	-2.34628	0.501418	-4.67929	2.87872e-06	1.70997e-05
WBGene00020329	bath-26	28.8297	-2.34626	0.590837	-3.97108	7.15484e-05	0.000325954
WBGene00016101	C25E10.12	181.48	-2.34465	0.335665	-6.9851	2.84663e-12	3.76109e-11
WBGene00044294	C01B10.11	1549.89	-2.34371	0.177068	-13.2362	5.42019e-40	3.26457e-38
WBGene00000283	cah-5	299.359	-2.34274	0.257454	-9.09963	9.06435e-20	2.11887e-18
WBGene00044019	C55A6.12	106.884	-2.34104	0.417744	-5.60402	2.09441e-08	1.7394e-07
WBGene00012255	lpr-6	3628.46	-2.33686	0.215743	-10.8317	2.43678e-27	8.64249e-26
WBGene00022767	ZK563.2	80.3313	-2.33466	0.583715	-3.99967	6.34317e-05	0.000292161
WBGene00000082	adt-1	570.274	-2.3322	0.260311	-8.95929	3.2679e-19	7.36848e-18
WBGene00009578	F40F8.5	616.224	-2.33197	0.219271	-10.6351	2.04529e-26	6.95865e-25
WBGene00020378	T09B4.4	152.898	-2.33179	0.348359	-6.69366	2.17663e-11	2.62669e-10
WBGene00019828	R02E12.4	98.8449	-2.33064	0.442655	-5.26515	1.40075e-07	1.02515e-06
WBGene00004926	snt-6	105.6	-2.31953	0.355326	-6.5279	6.66995e-11	7.57079e-10
WBGene00249826	F42A9.18	23.6647	-2.31839	0.771072	-3.00671	0.00264091	0.00836569
WBGene00016599	C42D8.1	344.946	-2.3174	0.269482	-8.59946	8.00906e-18	1.62997e-16
WBGene00000630	col-53	122.6	-2.31703	0.390113	-5.93939	2.86085e-09	2.66567e-08
WBGene00009601	F40G12.6	26.8448	-2.31641	0.639352	-3.62306	0.000291137	0.00116551
WBGene00002101	ins-18	14.8115	-2.31308	0.90116	-2.56677	0.0102649	0.0272164
WBGene00020195	T03G6.3	1327.32	-2.30988	0.191763	-12.0455	2.04822e-33	9.57579e-32
WBGene00012162	sek-6	45.5527	-2.30777	0.575575	-4.00949	6.0849e-05	0.000281527
WBGene00000298	cat-4	64.4916	-2.30697	0.554721	-4.1588	3.19924e-05	0.000157966
WBGene00009813	haly-1	1152.31	-2.30626	0.207176	-11.1319	8.77414e-29	3.25886e-27
WBGene00022106	lgc-46	55.7386	-2.30304	0.587892	-3.91746	8.94852e-05	0.000399235
WBGene00013081	txt-14	98.0421	-2.30206	0.444941	-5.17385	2.29316e-07	1.61975e-06
WBGene00016033	C24A3.2	731.767	-2.29947	0.275555	-8.34487	7.12928e-17	1.3695e-15
WBGene00000733	col-160	586.583	-2.29593	0.811992	-2.82753	0.00469088	0.0138306
WBGene00016324	C32E8.6	37.9247	-2.29527	0.640835	-3.58169	0.000341379	0.00134807
WBGene00008336	C55A6.7	65.4603	-2.2948	0.452834	-5.06765	4.0275e-07	2.74614e-06
WBGene00013784	Y116A8C.3	26.484	-2.29206	0.648092	-3.53662	0.000405276	0.00157436
WBGene00003997	pgp-3	84.9597	-2.29135	0.532558	-4.30254	1.68854e-05	8.80211e-05
WBGene00013074	hmit-1.2	45.101	-2.29063	0.491831	-4.65736	3.20292e-06	1.89413e-05
WBGene00001581	gfi-1	7584.03	-2.28998	0.251977	-9.08803	1.00849e-19	2.34923e-18
WBGene00020626	T20F5.4	13105.1	-2.28766	0.201686	-11.3427	8.06228e-30	3.19883e-28
WBGene00019272	H42K12.3	5514.44	-2.28601	0.173708	-13.1601	1.48825e-39	8.88369e-38
WBGene00000893	cyn-17	2914.85	-2.28268	0.216161	-10.5601	4.5617e-26	1.51728e-24
WBGene00001752	gst-4	147.191	-2.28209	0.32418	-7.03959	1.92806e-12	2.59879e-11
WBGene00020813	T25G12.6	74.8614	-2.28156	0.491638	-4.64074	3.4717e-06	2.04494e-05
WBGene00018136	F37A4.6	69.9404	-2.28051	0.413718	-5.51224	3.543e-08	2.84014e-07
WBGene00019649	exc-14	114.397	-2.27856	0.343087	-6.64134	3.1085e-11	3.68799e-10
WBGene00197733	T25C12.5	40.1216	-2.27706	0.52405	-4.34512	1.39197e-05	7.38867e-05
WBGene00000529	clh-2	106.167	-2.27634	0.412439	-5.51921	3.40531e-08	2.74126e-07
WBGene00010917	M110.9	27.9706	-2.27569	0.698262	-3.25907	0.00111778	0.00387699
WBGene00015921	C17H11.1	50.4831	-2.27384	0.476089	-4.77607	1.78756e-06	1.09892e-05
WBGene00001863	him-4	5322.25	-2.27327	0.171732	-13.2373	5.344e-40	3.23324e-38
WBGene00000634	col-58	147.609	-2.26553	0.358273	-6.32347	2.55746e-10	2.75107e-09
WBGene00001715	grl-6	50.4478	-2.26273	0.471416	-4.79986	1.58779e-06	9.81521e-06
WBGene00045481	M153.5	59.9684	-2.26019	0.44245	-5.10835	3.24978e-07	2.25261e-06
WBGene00011291	R102.4	402.732	-2.26008	0.21628	-10.4498	1.46836e-25	4.75386e-24
WBGene00199797	C54G7.14	23.2169	-2.25844	0.795844	-2.83779	0.00454265	0.013438
WBGene00010998	R03G8.3	71.3095	-2.25719	0.519981	-4.34091	1.41894e-05	7.51985e-05
WBGene00010041	F54C9.3	57.9522	-2.25515	0.562267	-4.01081	6.05107e-05	0.000280349
WBGene00016655	acbp-1	66.8593	-2.25393	0.452117	-4.98528	6.18732e-07	4.0754e-06
WBGene00004033	pkc-2	599.981	-2.25334	0.232314	-9.69956	3.0279e-22	8.38221e-21
WBGene00019759	M03F4.6	711.49	-2.25162	0.217377	-10.3581	3.84488e-25	1.22405e-23
WBGene00019868	R04B3.3	391.657	-2.2494	0.24023	-9.36354	7.71126e-21	1.94176e-19
WBGene00003943	pbo-4	356.846	-2.24839	0.24835	-9.05331	1.38699e-19	3.18651e-18
WBGene00010887	M7.12	16.1602	-2.24774	0.826497	-2.7196	0.00653612	0.0184182
WBGene00008743	F13D12.9	750.4	-2.24505	0.291644	-7.69792	1.383e-14	2.23065e-13
WBGene00003941	pbo-1	219.22	-2.24416	0.27171	-8.2594	1.46408e-16	2.72649e-15
WBGene00009048	cth-1	847.326	-2.24276	0.235819	-9.51049	1.89758e-21	5.00444e-20
WBGene00001466	flr-2	110.939	-2.24148	0.44235	-5.06721	4.03682e-07	2.75108e-06
WBGene00020938	clec-218	11.7057	-2.23809	0.958511	-2.33496	0.0195453	0.0473615
WBGene00001570	gei-13	26457	-2.23798	0.22934	-9.75834	1.69919e-22	4.72346e-21
WBGene00044696	F52E1.14	37.6213	-2.23746	0.650764	-3.43821	0.000585571	0.00218279
WBGene00004210	ptc-3	8694.66	-2.23511	0.20033	-11.1572	6.60573e-29	2.48105e-27
WBGene00003169	mec-5	268.52	-2.23477	0.25145	-8.88753	6.24814e-19	1.37408e-17
WBGene00002138	inx-16	211.083	-2.23372	0.256643	-8.7036	3.21525e-18	6.79164e-17
WBGene00004219	ptr-4	4208.09	-2.2336	0.172973	-12.913	3.80299e-38	2.1824e-36
WBGene00012457	acbp-6	78.7972	-2.23222	0.433227	-5.15255	2.56974e-07	1.80557e-06
WBGene00018487	F46C8.8	529.666	-2.2315	0.223248	-9.99563	1.59275e-23	4.73259e-22
WBGene00044620	bus-4	269.786	-2.22953	0.288805	-7.71986	1.16456e-14	1.90126e-13
WBGene00220111	W01H2.11	48.7206	-2.22812	0.6437	-3.46143	0.00053732	0.00202096
WBGene00021124	W10C4.1	397.843	-2.22785	0.235059	-9.47786	2.59541e-21	6.76476e-20
WBGene00011955	cdka-1	984.583	-2.22422	0.305841	-7.27247	3.52978e-13	5.11894e-12
WBGene00010822	M01G12.9	207.058	-2.22116	0.297207	-7.47343	7.81282e-14	1.18981e-12
WBGene00007180	B0457.6	99.7807	-2.22051	0.374047	-5.93645	2.91265e-09	2.71016e-08
WBGene00018899	F55G1.1	125.275	-2.21996	0.407664	-5.44556	5.16415e-08	4.02796e-07
WBGene00020254	T05C3.2	45.9478	-2.21854	0.569218	-3.89752	9.71845e-05	0.000430711
WBGene00012615	dct-16	34.157	-2.21808	0.595546	-3.72444	0.000195747	0.00081351
WBGene00008636	F10A3.11	26.0146	-2.21796	0.666344	-3.32856	0.000872977	0.00311269
WBGene00015965	ugt-48	174.388	-2.21424	0.319909	-6.92148	4.46962e-12	5.80227e-11
WBGene00011773	ttr-53	190.001	-2.21369	0.296293	-7.47126	7.94294e-14	1.20825e-12
WBGene00013574	lron-13	362.633	-2.21109	0.255559	-8.65199	5.06091e-18	1.04589e-16
WBGene00011906	hsp-12.1	334.148	-2.2109	0.246125	-8.98286	2.6382e-19	5.97888e-18
WBGene00002234	kqt-2	230.76	-2.21086	0.340269	-6.49739	8.17253e-11	9.22151e-10
WBGene00009543	F38E11.6	57.3136	-2.20972	0.562473	-3.92857	8.54518e-05	0.000383158
WBGene00021597	spsb-1	1994.83	-2.2083	0.216528	-10.1987	2.0098e-24	6.26411e-23
WBGene00200172	K01A6.18	14.3698	-2.20694	0.995071	-2.21787	0.0265638	0.0612348
WBGene00198157	R11B5.7	7.92214	-2.20689	1.08881	-2.02687	0.0426756	0.0914301
WBGene00003751	nlp-13	54.7215	-2.20631	0.434029	-5.08333	3.70865e-07	2.5456e-06
WBGene00008786	oac-16	26.3459	-2.20521	0.875879	-2.51771	0.0118119	0.0306495
WBGene00021029	W04D12.1	32.6374	-2.20474	0.669873	-3.29128	0.000997333	0.00350101
WBGene00012948	dhhc-2	255.784	-2.20326	0.249407	-8.834	1.01001e-18	2.18879e-17
WBGene00015076	B0238.12	21.0504	-2.20325	0.759533	-2.9008	0.00372215	0.0113111
WBGene00005101	srd-23	11.3353	-2.20178	1.03307	-2.13131	0.0330637	0.0738302
WBGene00017201	grsp-4	29.3348	-2.20099	0.699903	-3.14472	0.00166248	0.00554617
WBGene00017193	F07C3.2	139.237	-2.20007	0.424602	-5.1815	2.20109e-07	1.55883e-06
WBGene00003731	nhx-3	33.9007	-2.19669	0.629854	-3.48762	0.000487347	0.00185386
WBGene00010268	arrd-10	406.379	-2.19649	0.27365	-8.02663	1.00186e-15	1.76726e-14
WBGene00008708	F11E6.4	23.0219	-2.19567	0.79442	-2.76387	0.00571205	0.0164038
WBGene00043066	acr-25	84.1899	-2.19523	0.501823	-4.3745	1.2171e-05	6.51738e-05
WBGene00015427	C04E6.13	29.5033	-2.19488	0.744394	-2.94855	0.00319273	0.00988194
WBGene00022287	Y75B7AR.1	117.473	-2.19456	0.430406	-5.09881	3.41798e-07	2.36063e-06
WBGene00009157	F26E4.2	381.315	-2.18901	0.270802	-8.08341	6.29794e-16	1.12882e-14
WBGene00011090	R07B7.6	121.042	-2.18899	0.329757	-6.6382	3.17542e-11	3.7574e-10
WBGene00018626	F49D11.2	9.89335	-2.18628	0.986702	-2.21575	0.0267088	0.0614488
WBGene00007945	C34F6.11	17.666	-2.18282	0.78163	-2.79265	0.00522787	0.0152093
WBGene00016435	C35B1.5	921.103	-2.1823	0.235081	-9.28318	1.64497e-20	4.08068e-19
WBGene00015010	ptps-1	14.6327	-2.17991	0.841428	-2.59072	0.00957748	0.0256892
WBGene00206361	K02G10.15	55.7522	-2.17951	0.542941	-4.01426	5.96315e-05	0.000276852
WBGene00012382	ttr-16	1549.95	-2.17717	0.232223	-9.37534	6.89516e-21	1.74944e-19
WBGene00021279	Y23H5B.8	323.664	-2.17625	0.262805	-8.28084	1.22313e-16	2.30346e-15
WBGene00003168	mec-4	53.9386	-2.17615	0.474845	-4.58287	4.58635e-06	2.65243e-05
WBGene00019948	R08C7.4	124.984	-2.17462	0.390352	-5.57092	2.53402e-08	2.07858e-07
WBGene00010740	K10D3.6	68.0786	-2.17212	0.581495	-3.73541	0.000187408	0.000782339
WBGene00016982	C56G2.9	14.7072	-2.1682	0.824464	-2.62983	0.00854285	0.0232925
WBGene00020903	acd-5	117.759	-2.16733	0.425318	-5.09577	3.47318e-07	2.39751e-06
WBGene00009394	clec-63	1543.79	-2.16574	0.288922	-7.49595	6.58214e-14	1.01044e-12
WBGene00010790	sodh-1	1200.22	-2.16518	0.196815	-11.0011	3.77469e-28	1.36041e-26
WBGene00006633	tsp-7	225.47	-2.16482	0.482837	-4.48353	7.34179e-06	4.092e-05
WBGene00007537	fipr-8	17.5636	-2.16462	0.880793	-2.45758	0.0139875	0.0354184
WBGene00004104	pqn-13	10413.2	-2.16249	0.232964	-9.28251	1.65528e-20	4.09867e-19
WBGene00017290	F09E5.12	76.6044	-2.16186	0.523897	-4.12649	3.68334e-05	0.000178507
WBGene00017374	ttr-41	763.003	-2.16029	0.233831	-9.2387	2.4952e-20	6.06606e-19
WBGene00044418	C08G5.7	159.448	-2.15898	0.350909	-6.15254	7.6253e-10	7.74756e-09
WBGene00013849	ZC84.6	1773.04	-2.15673	0.197701	-10.9091	1.04339e-27	3.74026e-26
WBGene00000563	cng-3	9.82177	-2.15528	1.00974	-2.13449	0.0328027	0.0733085
WBGene00018038	F35C8.8	11.6912	-2.15134	1.02995	-2.08879	0.0367267	0.0806624
WBGene00020075	math-35	30.3475	-2.15092	0.57943	-3.71213	0.000205523	0.000849102
WBGene00003565	ncs-3	20.0653	-2.15043	0.836042	-2.57215	0.0101069	0.0268401
WBGene00000067	act-5	7977.4	-2.14913	0.198835	-10.8086	3.13258e-27	1.10516e-25
WBGene00016585	oac-59	112.825	-2.14855	0.323544	-6.64068	3.12244e-11	3.70125e-10
WBGene00016677	C45G9.6	81.1835	-2.14839	0.430882	-4.98602	6.16366e-07	4.06182e-06
WBGene00016762	ugt-24	55.3282	-2.14723	0.466857	-4.59933	4.2386e-06	2.46089e-05
WBGene00002976	lev-9	250.287	-2.14697	0.284324	-7.55113	4.31498e-14	6.73228e-13
WBGene00003887	osm-7	609.412	-2.14655	0.282811	-7.59005	3.19786e-14	5.03042e-13
WBGene00001721	grl-12	102.64	-2.14571	0.340444	-6.30267	2.92555e-10	3.1294e-09
WBGene00010994	lgc-25	64.7	-2.14556	0.45908	-4.67361	2.95951e-06	1.75484e-05
WBGene00011335	T01E8.8	285.876	-2.14421	0.353464	-6.06628	1.3091e-09	1.28328e-08
WBGene00001623	glt-5	49.3447	-2.14009	0.652116	-3.28176	0.00103161	0.00360714
WBGene00017858	F27C1.11	94.1483	-2.13831	0.392814	-5.44357	5.22233e-08	4.06448e-07
WBGene00197310	F26A10.11	14.7714	-2.13466	0.920639	-2.31867	0.0204131	0.0491702
WBGene00001954	hlh-10	49.358	-2.13137	0.709848	-3.00258	0.00267702	0.00846805
WBGene00009475	F36F2.1	59.5995	-2.12814	0.506657	-4.20035	2.66497e-05	0.000133508
WBGene00003773	nlt-1	171.83	-2.12789	0.30253	-7.03365	2.01204e-12	2.70381e-11
WBGene00015116	paic-1	143.536	-2.12647	0.403903	-5.2648	1.40343e-07	1.02655e-06
WBGene00011891	del-6	124.033	-2.12569	0.421466	-5.04355	4.56965e-07	3.09528e-06
WBGene00017427	acp-5	98.7557	-2.12007	0.409005	-5.18349	2.17774e-07	1.54495e-06
WBGene00044481	ZK185.5	48.4051	-2.11838	0.630095	-3.36199	0.000773821	0.00279039
WBGene00003956	pcp-1	782.716	-2.11729	0.204515	-10.3527	4.06694e-25	1.29166e-23
WBGene00001795	gtl-1	897.484	-2.11594	0.201328	-10.5099	7.77713e-26	2.55499e-24
WBGene00017688	ttr-35	220.1	-2.11548	0.248089	-8.5271	1.50066e-17	2.9993e-16
WBGene00007817	C30F2.3	25.7359	-2.1088	0.661603	-3.1874	0.00143557	0.00485703
WBGene00006822	unc-93	127.061	-2.10675	0.369394	-5.70328	1.17526e-08	1.01057e-07
WBGene00019803	PDB1.1	132.916	-2.10616	0.350887	-6.0024	1.94422e-09	1.86486e-08
WBGene00015566	C07D10.1	273.387	-2.10525	0.270585	-7.78037	7.23099e-15	1.1966e-13
WBGene00002137	inx-15	1158.5	-2.10348	0.183603	-11.4567	2.17605e-30	8.87071e-29
WBGene00011103	R07E3.2	166.488	-2.10253	0.425927	-4.93635	7.95974e-07	5.14401e-06
WBGene00271812	F58F12.12	25.9872	-2.10008	0.737027	-2.84939	0.00438025	0.0130123
WBGene00013916	ZC504.1	49.9685	-2.09871	0.617595	-3.39819	0.000678331	0.00247949
WBGene00008692	scav-4	146.708	-2.09834	0.331651	-6.32695	2.50054e-10	2.69418e-09
WBGene00017036	D1069.1	53.9061	-2.09725	0.502576	-4.173	3.00617e-05	0.000148983
WBGene00016628	slc-36.5	128.665	-2.09657	0.361773	-5.79526	6.82148e-09	6.05644e-08
WBGene00018172	F38B6.2	137.476	-2.09611	0.359603	-5.82896	5.57748e-09	5.01186e-08
WBGene00044394	B0034.7	146.337	-2.09546	0.397148	-5.27626	1.31846e-07	9.68102e-07
WBGene00020857	srt-62	8.12131	-2.09336	1.06171	-1.97169	0.0486454	0.101615
WBGene00005018	sqt-3	152927	-2.09055	0.224196	-9.32462	1.11381e-20	2.79414e-19
WBGene00006532	tba-6	120.05	-2.09034	0.36301	-5.75837	8.49285e-09	7.4562e-08
WBGene00011197	srw-145	24.9816	-2.08916	0.733156	-2.84954	0.00437826	0.0130093
WBGene00019727	zig-12	535.317	-2.08779	0.232445	-8.98188	2.66181e-19	6.02217e-18
WBGene00009533	F38B7.2	28.3937	-2.08395	0.694101	-3.00237	0.00267886	0.00847187
WBGene00018067	npr-7	23.5164	-2.08341	0.674298	-3.08975	0.00200325	0.00655063
WBGene00017465	F14F9.2	18.2838	-2.08059	0.794056	-2.6202	0.00878786	0.0238632
WBGene00001468	flr-4	93.0384	-2.08045	0.403046	-5.16182	2.44567e-07	1.72292e-06
WBGene00201778	H01A20.5	9.40407	-2.08039	0.982262	-2.11796	0.0341788	0.0759524
WBGene00020484	T13C5.3	61.6916	-2.08034	0.404156	-5.14738	2.64156e-07	1.85117e-06
WBGene00018429	F44E7.7	19.8315	-2.08029	0.836409	-2.48717	0.0128764	0.0329577
WBGene00020478	T13C2.2	358.53	-2.08022	0.296798	-7.00889	2.40208e-12	3.19585e-11
WBGene00017327	F10C1.8	63.8637	-2.07944	0.487572	-4.26489	1.99999e-05	0.000102538
WBGene00000928	dao-2	2135.99	-2.07942	0.278372	-7.46995	8.0226e-14	1.21898e-12
WBGene00003531	nas-12	66.0157	-2.07559	0.484463	-4.28431	1.83307e-05	9.46329e-05
WBGene00007892	C33B4.4	27.758	-2.07365	0.663766	-3.12407	0.00178368	0.00590628
WBGene00006080	str-12	12.4439	-2.07314	0.847025	-2.44755	0.014383	0.0362585
WBGene00008644	F10C2.3	118.664	-2.07175	0.409021	-5.06514	4.0811e-07	2.77843e-06
WBGene00001543	gcy-18	126.316	-2.07027	0.340482	-6.08041	1.19877e-09	1.18206e-08
WBGene00001373	exp-1	21.5671	-2.06973	0.748608	-2.76477	0.00569634	0.0163657
WBGene00011305	R186.1	38.2688	-2.06955	0.564759	-3.66448	0.000247845	0.00100636
WBGene00044803	C02G6.3	162.669	-2.06917	0.410286	-5.04324	4.57704e-07	3.09871e-06
WBGene00019360	neto-1	79.3317	-2.06906	0.449188	-4.60623	4.10034e-06	2.3858e-05
WBGene00000778	cpn-2	492.068	-2.06724	0.261084	-7.91792	2.41526e-15	4.16702e-14
WBGene00000692	col-118	474.608	-2.06659	0.230787	-8.95452	3.41222e-19	7.65517e-18
WBGene00044630	bus-17	549.418	-2.06201	0.19226	-10.7251	7.76052e-27	2.69522e-25
WBGene00000286	cal-2	105.759	-2.06162	0.412656	-4.99599	5.85352e-07	3.87847e-06
WBGene00007951	dmsr-8	103.967	-2.0616	0.344277	-5.9882	2.12178e-09	2.01065e-08
WBGene00021645	Y47G6A.19	135.173	-2.06078	0.418562	-4.92348	8.50201e-07	5.4733e-06
WBGene00020846	T27A10.6	5947.06	-2.05896	0.199632	-10.3138	6.10485e-25	1.92519e-23
WBGene00001814	haf-4	1079.95	-2.05731	0.240184	-8.56554	1.07566e-17	2.16281e-16
WBGene00044452	Y102E9.5	124.126	-2.05684	0.41523	-4.95349	7.28957e-07	4.73379e-06
WBGene00195868	F26A10.6	25.1994	-2.05533	0.692703	-2.96711	0.0030061	0.00936936
WBGene00018594	aman-3	125.128	-2.05464	0.307966	-6.67163	2.52973e-11	3.02279e-10
WBGene00002084	ins-1	65.2189	-2.05442	0.473576	-4.33809	1.43726e-05	7.60489e-05
WBGene00015527	C06E2.1	130.362	-2.05356	0.467642	-4.39131	1.12672e-05	6.0772e-05
WBGene00019404	K05B2.4	111.991	-2.05285	0.417478	-4.91727	8.77594e-07	5.63337e-06
WBGene00010850	M04C3.1	675.238	-2.05064	0.236975	-8.65341	4.99841e-18	1.03458e-16
WBGene00015742	kxd-1	42.3302	-2.04962	0.519203	-3.94762	7.89316e-05	0.000356914
WBGene00019480	K07C11.8	62.2793	-2.0493	0.408445	-5.01734	5.23924e-07	3.51324e-06
WBGene00019839	R02F11.1	4648.77	-2.0484	0.263262	-7.78087	7.20256e-15	1.19338e-13
WBGene00000696	col-122	118.307	-2.04268	1.27315	-1.60443	0.10862	0.196267
WBGene00011339	T01G5.1	216.519	-2.04196	0.307716	-6.63587	3.22601e-11	3.81388e-10
WBGene00045455	F26G1.11	18.2857	-2.04165	0.758885	-2.69033	0.00713809	0.0198633
WBGene00165222	21ur-14927	12.8787	-2.04143	1.0025	-2.03635	0.0417155	0.0897327
WBGene00077786	F53F8.7	16.7744	-2.0404	0.836137	-2.44027	0.0146762	0.0368865
WBGene00000389	cdc-25.4	19.2797	-2.0387	0.78735	-2.58932	0.00961659	0.0257647
WBGene00020294	T06F4.1	173.935	-2.03828	0.318254	-6.40458	1.50779e-10	1.66205e-09
WBGene00015124	anmt-1	80.7041	-2.03716	0.481069	-4.23465	2.28906e-05	0.00011598
WBGene00017426	F13C5.5	201.865	-2.03629	0.275219	-7.3988	1.3742e-13	2.05072e-12
WBGene00015713	C12D12.1	1755.07	-2.03456	0.273688	-7.43386	1.05477e-13	1.59e-12
WBGene00003981	pes-8	55.5806	-2.03315	0.590233	-3.44465	0.000571798	0.0021392
WBGene00010834	mct-3	2078.78	-2.03095	0.178323	-11.3891	4.73612e-30	1.89035e-28
WBGene00021008	W03F11.5	97.7723	-2.02873	0.386702	-5.24623	1.55245e-07	1.1263e-06
WBGene00011314	T01B7.9	192.483	-2.02852	0.380074	-5.33718	9.44014e-08	7.03983e-07
WBGene00009867	F49C5.4	19.8815	-2.02803	0.700574	-2.89481	0.00379387	0.0115055
WBGene00001132	alp-1	9081.69	-2.02667	0.203632	-9.95264	2.45588e-23	7.20123e-22
WBGene00200644	ZK973.23	14.9395	-2.02612	0.820665	-2.46888	0.0135537	0.0344866
WBGene00008354	gcsh-1	33.3755	-2.02573	0.566259	-3.57739	0.000347048	0.00136723
WBGene00014989	best-23	228.754	-2.02558	0.320127	-6.32742	2.49302e-10	2.68824e-09
WBGene00010575	flp-25	12.3499	-2.0251	0.883685	-2.29165	0.0219258	0.052117
WBGene00001059	dpf-6	202.929	-2.02452	0.330429	-6.12695	8.95781e-10	9.00202e-09
WBGene00019713	pqn-52	1087.08	-2.0193	0.274615	-7.35321	1.93507e-13	2.86215e-12
WBGene00011870	T20G5.8	31.1285	-2.01824	0.629427	-3.20647	0.00134374	0.00457412
WBGene00004113	pqn-24	205.913	-2.01787	0.336297	-6.00026	1.96996e-09	1.88549e-08
WBGene00020722	T23B12.8	45.5827	-2.01622	0.570616	-3.53341	0.00041023	0.00158945
WBGene00018133	F37A4.3	193.558	-2.01535	0.277916	-7.25165	4.1172e-13	5.91312e-12
WBGene00008967	F20B10.3	94.3431	-2.01366	0.468309	-4.29986	1.70908e-05	8.89882e-05
WBGene00007214	C01A2.2	761.545	-2.01334	0.178802	-11.2602	2.06353e-29	7.9744e-28
WBGene00010033	F54B11.10	213.042	-2.01114	0.349115	-5.76068	8.37772e-09	7.36964e-08
WBGene00017745	F23F1.4	220.753	-2.00951	0.297786	-6.74817	1.49718e-11	1.82987e-10
WBGene00008270	C53A5.13	120.728	-2.00813	0.342403	-5.86481	4.49656e-09	4.09282e-08
WBGene00013263	txdc-12.1	3045.29	-2.00802	0.169013	-11.8809	1.48786e-32	6.81307e-31
WBGene00022644	dod-19	146.533	-2.00728	0.377311	-5.31996	1.03788e-07	7.69262e-07
WBGene00010904	ugt-62	228.956	-2.00665	0.291553	-6.88263	5.8758e-12	7.49669e-11
WBGene00010784	twk-48	22.2591	-2.00381	0.713349	-2.80902	0.00496923	0.0145327
WBGene00010348	H01G02.1	125.739	-2.0036	0.519224	-3.85884	0.000113925	0.000497808
WBGene00009059	chw-1	185.774	-2.00238	0.321974	-6.21909	5.00061e-10	5.17516e-09
WBGene00020012	R11G1.6	3007.74	-2.0016	0.171776	-11.6524	2.23173e-31	9.50335e-30
WBGene00077593	C49G7.12	73.48	-2.00155	0.417087	-4.79888	1.59556e-06	9.85867e-06
WBGene00006672	twk-18	608.351	-2.00098	0.295384	-6.77416	1.25133e-11	1.54922e-10
WBGene00000835	cuc-1	147.379	-1.99871	0.31077	-6.43147	1.26374e-10	1.39996e-09
WBGene00003876	pept-2	115.595	-1.99809	0.333688	-5.98791	2.12558e-09	2.01283e-08
WBGene00011494	T05F1.9	52.901	-1.99765	0.468343	-4.26537	1.99575e-05	0.000102399
WBGene00044641	T01D1.8	155.637	-1.99699	0.344916	-5.78979	7.04749e-09	6.24881e-08
WBGene00016570	gnrr-4	47.3932	-1.99523	0.553002	-3.60799	0.000308581	0.00123129
WBGene00018257	F41B4.1	103.025	-1.99342	0.492563	-4.04705	5.18679e-05	0.00024463
WBGene00017687	ets-4	1037.1	-1.99256	0.173719	-11.47	1.8671e-30	7.68154e-29
WBGene00006309	sul-2	228.576	-1.99194	0.29279	-6.8033	1.02247e-11	1.27651e-10
WBGene00010334	del-5	94.4373	-1.98929	0.424313	-4.68826	2.75534e-06	1.64325e-05
WBGene00010926	M153.3	90.5114	-1.98796	0.406589	-4.88935	1.01171e-06	6.44476e-06
WBGene00194915	JC8.16	426.109	-1.98558	0.229373	-8.65653	4.86355e-18	1.01136e-16
WBGene00019776	M6.4	48.1377	-1.98551	0.494997	-4.01115	6.04233e-05	0.000280041
WBGene00011212	R10E8.6	52.4913	-1.98494	0.523756	-3.78982	0.000150756	0.000641551
WBGene00012728	Y39G8B.9	22.812	-1.98439	0.707393	-2.80521	0.00502833	0.0146927
WBGene00021005	ule-1	102.478	-1.98275	1.06934	-1.85419	0.0637118	0.126732
WBGene00009886	F49E2.2	608.974	-1.97702	0.297489	-6.64569	3.018e-11	3.59019e-10
WBGene00008298	C54D10.3	13.2144	-1.97674	0.851954	-2.32024	0.0203279	0.0490162
WBGene00016325	C32E8.9	41.5518	-1.97453	0.565058	-3.49438	0.000475165	0.00181164
WBGene00200953	T22C1.15	11.2263	-1.97291	1.02757	-1.91998	0.0548603	0.112419
WBGene00019346	K02G10.5	269.234	-1.97194	0.274802	-7.17588	7.18414e-13	1.00375e-11
WBGene00018984	F56F10.1	350.724	-1.9719	0.293572	-6.71694	1.85583e-11	2.24971e-10
WBGene00002054	ifb-2	5862.14	-1.96987	0.196825	-10.0082	1.40214e-23	4.18483e-22
WBGene00016894	C53B7.3	54.8074	-1.96155	0.472607	-4.1505	3.3175e-05	0.000162783
WBGene00001490	frm-3	2778.2	-1.9613	0.195304	-10.0423	9.93287e-24	2.97786e-22
WBGene00001465	flr-1	117.373	-1.96035	0.312437	-6.27438	3.51033e-10	3.70454e-09
WBGene00235308	C37C3.17	38.3088	-1.95779	0.554283	-3.53211	0.00041226	0.00159685
WBGene00009882	vha-17	753.61	-1.95588	0.248598	-7.86762	3.61441e-15	6.16432e-14
WBGene00004764	sel-7	924.944	-1.95588	0.242136	-8.07759	6.60585e-16	1.17926e-14
WBGene00017227	F07G6.8	33.5847	-1.95529	0.560464	-3.4887	0.000485367	0.00184685
WBGene00003747	nlp-9	51.1742	-1.95463	0.485422	-4.02665	5.65761e-05	0.000264134
WBGene00013662	Y105C5B.25	14.404	-1.95435	0.831851	-2.3494	0.0188037	0.0458302
WBGene00045248	ZK180.7	52.3534	-1.95416	0.593148	-3.29456	0.000985766	0.00346769
WBGene00020308	T07D3.5	29.1446	-1.954	0.716579	-2.72685	0.00639422	0.0180755
WBGene00005655	srr-4	348.715	-1.95342	0.285606	-6.83956	7.94349e-12	1.00295e-10
WBGene00001122	dyf-6	286.25	-1.95297	0.26337	-7.41533	1.2132e-13	1.81858e-12
WBGene00020506	dop-3	66.3544	-1.95029	0.404622	-4.82005	1.43525e-06	8.94236e-06
WBGene00010648	K08C7.6	238.221	-1.9461	0.282109	-6.89837	5.26009e-12	6.75626e-11
WBGene00012201	W02B12.1	251.496	-1.94561	0.337873	-5.7584	8.49133e-09	7.4562e-08
WBGene00003533	nas-14	105.729	-1.94463	0.341689	-5.69123	1.2613e-08	1.08246e-07
WBGene00002274	lec-11	87.2721	-1.94334	0.599389	-3.2422	0.00118609	0.00408427
WBGene00016932	C54G6.3	42.4334	-1.94197	0.698883	-2.77867	0.00545816	0.0157729
WBGene00010524	K03B8.6	788.788	-1.94158	0.175482	-11.0643	1.86955e-28	6.79287e-27
WBGene00022845	ZK1055.4	125.224	-1.94141	0.489811	-3.96359	7.38316e-05	0.000335555
WBGene00014008	ZK596.3	66.913	-1.94025	0.602349	-3.22114	0.00127681	0.0043674
WBGene00005187	srg-30	71.4826	-1.93966	0.448351	-4.3262	1.51704e-05	7.99227e-05
WBGene00019640	dos-2	72.4932	-1.93747	0.482462	-4.01581	5.92431e-05	0.000275431
WBGene00000750	col-177	109.54	-1.93699	0.403869	-4.79608	1.61798e-06	9.98799e-06
WBGene00011407	ppat-1	89.2524	-1.93458	0.513478	-3.7676	0.000164824	0.000695226
WBGene00016758	C49A9.4	30.3238	-1.93368	0.554671	-3.48618	0.000489964	0.0018617
WBGene00008819	shw-1	308.772	-1.93129	0.268171	-7.20172	5.94583e-13	8.38626e-12
WBGene00044350	Y73B6BL.44	13.421	-1.92484	0.805071	-2.3909	0.0168072	0.0414858
WBGene00008885	F16C3.1	22.3663	-1.92373	0.770478	-2.4968	0.0125319	0.0321992
WBGene00000288	cal-4	50.4303	-1.92228	0.520612	-3.69235	0.00022219	0.00091132
WBGene00011495	T05F1.11	169.842	-1.92171	0.433569	-4.43231	9.32303e-06	5.10267e-05
WBGene00009620	fip-5	16.3488	-1.92169	0.862876	-2.22707	0.0259424	0.0600547
WBGene00021939	Y55F3BR.2	1523.85	-1.92148	0.223552	-8.59524	8.30937e-18	1.68852e-16
WBGene00008677	F11A5.9	19.3522	-1.91817	0.999618	-1.9189	0.0549969	0.112648
WBGene00007999	tag-297	1229.55	-1.91794	0.231125	-8.29826	1.0565e-16	1.99246e-15
WBGene00006067	sto-5	299.46	-1.91732	0.279228	-6.8665	6.57971e-12	8.35492e-11
WBGene00019718	M01H9.2	68.8277	-1.91694	0.470058	-4.0781	4.54056e-05	0.000216287
WBGene00009430	F35E12.6	61.0412	-1.91287	0.487178	-3.92643	8.62149e-05	0.00038632
WBGene00000063	act-1	7015.78	-1.91023	0.315606	-6.05259	1.42534e-09	1.3901e-08
WBGene00014262	ZK1321.4	100.764	-1.90916	0.423029	-4.51307	6.38961e-06	3.60792e-05
WBGene00013960	cutl-8	555.499	-1.90802	0.225017	-8.47942	2.26311e-17	4.46973e-16
WBGene00002393	lpr-1	215.884	-1.9055	0.272138	-7.00197	2.52393e-12	3.35129e-11
WBGene00016638	perm-4	905.709	-1.90529	1.66173	-1.14657	0.251561	0.380157
WBGene00020704	not found	150.878	-1.90457	0.301961	-6.30732	2.83908e-10	3.04405e-09
WBGene00010191	dmsr-1	486.242	-1.90112	0.231148	-8.22468	1.95719e-16	3.60959e-15
WBGene00009593	mam-7	170.754	-1.9001	0.362284	-5.24479	1.56458e-07	1.13449e-06
WBGene00003982	pes-9	617.073	-1.89967	0.199165	-9.53819	1.45352e-21	3.8715e-20
WBGene00008252	C51E3.6	76.8123	-1.89916	0.381823	-4.97392	6.56137e-07	4.3027e-06
WBGene00012635	Y38H8A.1	126.204	-1.89908	0.350543	-5.41754	6.04255e-08	4.64845e-07
WBGene00009715	F44G4.6	21.4857	-1.89847	0.70548	-2.69103	0.00712309	0.0198299
WBGene00003369	mlc-1	3783.07	-1.89595	0.192773	-9.83516	7.94411e-23	2.26967e-21
WBGene00006832	unc-105	688.329	-1.89376	0.221987	-8.53094	1.4516e-17	2.90995e-16
WBGene00007257	C01H6.8	103.121	-1.89309	0.413116	-4.58246	4.59541e-06	2.65652e-05
WBGene00004124	pqn-37	47.3585	-1.89211	0.543173	-3.48343	0.000495027	0.00187933
WBGene00003495	mup-2	13711.2	-1.89155	0.25613	-7.38511	1.52332e-13	2.26063e-12
WBGene00015218	B0507.1	1660.96	-1.89073	0.18729	-10.0952	5.80239e-24	1.76728e-22
WBGene00018343	F42A10.7	55.6016	-1.88984	0.709077	-2.66521	0.007694	0.0212029
WBGene00021984	Y59C2A.1	151.083	-1.88921	0.332452	-5.68265	1.32622e-08	1.13309e-07
WBGene00014233	ZK1128.7	82.8366	-1.88851	0.492023	-3.83825	0.000123914	0.000536199
WBGene00010266	dct-18	3563.18	-1.88752	0.179145	-10.5362	5.88056e-26	1.94146e-24
WBGene00021177	Y9C9A.5	16.8212	-1.88606	0.857499	-2.19949	0.0278432	0.0636939
WBGene00009047	F22B8.4	32.9425	-1.88595	0.705793	-2.6721	0.0075378	0.0208326
WBGene00008095	C44H4.6	62.2104	-1.88556	0.420714	-4.48181	7.40128e-06	4.12172e-05
WBGene00003958	pcp-3	923.404	-1.88554	0.272337	-6.92356	4.40447e-12	5.72882e-11
WBGene00020702	T22F7.3	349.407	-1.88377	0.288338	-6.53323	6.43673e-11	7.34975e-10
WBGene00002089	ins-6	45.8263	-1.88284	0.612615	-3.07345	0.00211601	0.00688398
WBGene00011801	T16G1.7	132.196	-1.882	0.475688	-3.95637	7.6098e-05	0.000345151
WBGene00009158	F26E4.3	660.416	-1.88031	0.256548	-7.32928	2.31399e-13	3.40753e-12
WBGene00006777	unc-41	4623.02	-1.8803	0.198013	-9.49586	2.18395e-21	5.71459e-20
WBGene00022608	madf-9	84.4849	-1.87778	0.352916	-5.32077	1.03328e-07	7.66274e-07
WBGene00013118	Y51H4A.24	110.902	-1.87476	0.409698	-4.57595	4.74069e-06	2.73223e-05
WBGene00220127	W10D5.5	12.0039	-1.87454	0.889238	-2.10803	0.0350285	0.0775825
WBGene00023419	F53F4.16	38.1963	-1.87195	0.547419	-3.41959	0.000627153	0.00231137
WBGene00015388	C03F11.2	106.228	-1.87185	0.465986	-4.01696	5.89533e-05	0.000274465
WBGene00010385	H12D21.9	140.716	-1.87167	0.371608	-5.03669	4.73651e-07	3.19697e-06
WBGene00005153	srf-3	421.651	-1.87061	0.271812	-6.882	5.90196e-12	7.52289e-11
WBGene00006748	unc-8	228.725	-1.87035	0.284733	-6.56879	5.07241e-11	5.84683e-10
WBGene00010057	F54D5.15	557.707	-1.87011	0.208147	-8.9846	2.59671e-19	5.89484e-18
WBGene00008607	F09B12.3	1579.78	-1.86841	0.193256	-9.66802	4.12272e-22	1.13426e-20
WBGene00001775	gst-27	37.2064	-1.86797	0.685478	-2.72506	0.0064289	0.0181505
WBGene00018723	F53A3.7	12.9018	-1.86672	0.822619	-2.26925	0.0232533	0.0547298
WBGene00004238	ptr-24	381.411	-1.86573	0.225796	-8.26292	1.42146e-16	2.65451e-15
WBGene00000687	col-113	527.925	-1.86561	0.297903	-6.26246	3.7895e-10	3.98031e-09
WBGene00010109	F55C10.5	21.5865	-1.86308	0.762038	-2.44487	0.0144906	0.0365023
WBGene00004988	spp-3	34.0465	-1.86281	0.59836	-3.11319	0.00185079	0.00610883
WBGene00020809	T25G12.1	19.5019	-1.86155	0.782962	-2.37757	0.0174273	0.0428424
WBGene00001701	grd-12	127.119	-1.86011	0.383542	-4.84982	1.23571e-06	7.79003e-06
WBGene00006687	twk-35	34.8992	-1.85998	0.541652	-3.4339	0.000594972	0.00221536
WBGene00044605	ttr-36	2421.74	-1.85984	0.232188	-8.01008	1.14633e-15	2.00885e-14
WBGene00011660	T09E11.11	61.3559	-1.85758	0.433051	-4.28952	1.79062e-05	9.25848e-05
WBGene00003480	klf-3	457.578	-1.85521	0.241584	-7.67936	1.59889e-14	2.57575e-13
WBGene00001986	hot-1	300.342	-1.85384	0.281821	-6.57808	4.76565e-11	5.5218e-10
WBGene00011404	T03F7.7	180.616	-1.85381	0.367655	-5.04226	4.60064e-07	3.11154e-06
WBGene00018772	F53G12.4	50.9689	-1.85279	0.551312	-3.3607	0.000777461	0.00280049
WBGene00000477	cft-1	84.4756	-1.851	0.464759	-3.98272	6.81318e-05	0.000311556
WBGene00001385	far-1	11125.6	-1.85034	0.218678	-8.46146	2.64041e-17	5.19954e-16
WBGene00013455	ssu-2	92.2895	-1.84866	0.43104	-4.28884	1.79607e-05	9.27947e-05
WBGene00010110	F55D12.1	154.844	-1.84792	0.306979	-6.0197	1.74741e-09	1.68819e-08
WBGene00008376	D1054.9	2857.99	-1.84714	0.276959	-6.66937	2.56909e-11	3.06708e-10
WBGene00006845	unc-122	290.561	-1.84475	0.34096	-5.41044	6.28697e-08	4.82566e-07
WBGene00022397	Y97E10AR.2	346.534	-1.84448	0.246698	-7.47668	7.6226e-14	1.16482e-12
WBGene00008150	mam-2	277.471	-1.84276	0.293894	-6.27014	3.60718e-10	3.80375e-09
WBGene00002050	ifa-1	1240.53	-1.83878	0.208948	-8.80019	1.36585e-18	2.94561e-17
WBGene00013921	best-22	142.579	-1.83862	0.392012	-4.69021	2.72927e-06	1.63134e-05
WBGene00015131	B0303.11	229.195	-1.83861	0.268667	-6.84346	7.73024e-12	9.76947e-11
WBGene00044701	AH9.6	38.2553	-1.83705	0.593977	-3.09279	0.00198282	0.00649333
WBGene00015496	C05E11.7	78.3565	-1.8354	0.358326	-5.12216	3.02048e-07	2.10458e-06
WBGene00008582	F08G5.3	28.2908	-1.83529	0.824423	-2.22616	0.0260038	0.0601655
WBGene00000906	daf-10	296.435	-1.83416	0.293198	-6.25568	3.95782e-10	4.14409e-09
WBGene00011364	cest-1.2	20.8009	-1.83244	0.664553	-2.7574	0.00582635	0.0166854
WBGene00017198	nhr-36	111.854	-1.82892	0.427405	-4.27912	1.87637e-05	9.67192e-05
WBGene00016293	C31H2.3	25.7251	-1.82875	0.65531	-2.79067	0.00525986	0.0152856
WBGene00010793	LLC1.2	181.595	-1.82803	0.285838	-6.39535	1.60182e-10	1.76135e-09
WBGene00200870	F42G4.10	18.2021	-1.82604	0.773458	-2.36088	0.0182316	0.0446312
WBGene00016114	flp-27	180.248	-1.82597	0.360637	-5.06319	4.12293e-07	2.80548e-06
WBGene00016319	C32D5.12	888.022	-1.82468	0.218917	-8.33504	7.74743e-17	1.47565e-15
WBGene00044446	C06G4.6	20.757	-1.82445	0.712686	-2.55997	0.0104682	0.0276786
WBGene00006538	tbb-4	1339.19	-1.82403	0.180108	-10.1274	4.175e-24	1.27452e-22
WBGene00008425	D2045.8	26.2448	-1.82321	0.699098	-2.60795	0.00910876	0.0245665
WBGene00014826	R13H4.2	207.321	-1.82293	0.3509	-5.19501	2.04709e-07	1.45749e-06
WBGene00003248	mig-17	387.339	-1.82245	0.238744	-7.63349	2.2848e-14	3.64559e-13
WBGene00006651	tts-2	11101.8	-1.82135	0.231379	-7.87172	3.49797e-15	5.98865e-14
WBGene00003741	nlp-3	24.5801	-1.8199	0.687072	-2.64877	0.0080785	0.0221302
WBGene00001618	glr-7	34.1194	-1.81853	0.633529	-2.87048	0.00409848	0.0123148
WBGene00007691	cest-8	165.425	-1.81735	0.321486	-5.65298	1.57692e-08	1.33534e-07
WBGene00007483	C09F12.3	16.6098	-1.81633	0.955663	-1.9006	0.0573544	0.116619
WBGene00001593	glc-3	52.7081	-1.8163	0.501288	-3.62327	0.000290898	0.00116495
WBGene00018024	F35A5.1	4098.34	-1.81569	0.2671	-6.7978	1.06226e-11	1.32126e-10
WBGene00196284	F26A10.9	12.8675	-1.81507	0.943984	-1.92277	0.0545086	0.111836
WBGene00014207	ZK1058.9	309.19	-1.81501	0.325142	-5.58219	2.37506e-08	1.95427e-07
WBGene00000895	dac-1	63.5252	-1.81471	0.413679	-4.38675	1.15057e-05	6.19583e-05
WBGene00007054	scpl-1	1003.45	-1.81009	0.174061	-10.3992	2.49999e-25	7.99699e-24
WBGene00017336	ugt-41	34.0716	-1.80951	0.573542	-3.15498	0.00160508	0.00537074
WBGene00006789	unc-54	76348.6	-1.80924	0.217669	-8.31185	9.42225e-17	1.78956e-15
WBGene00011336	ubxn-5	26.0362	-1.80674	0.743471	-2.43014	0.0150928	0.0377844
WBGene00001705	grd-16	440.067	-1.80631	0.23811	-7.58604	3.29836e-14	5.18241e-13
WBGene00018562	F47D12.6	28.8939	-1.80488	0.671156	-2.68921	0.0071622	0.019918
WBGene00200008	Y54G2A.66	10.999	-1.80219	0.899096	-2.00445	0.0450223	0.0954181
WBGene00014148	ZK909.3	361.249	-1.802	0.401828	-4.48451	7.30819e-06	4.08008e-05
WBGene00015027	B0207.2	13.2318	-1.80184	0.952298	-1.89209	0.0584784	0.118526
WBGene00017717	F22F4.4	67.7926	-1.80165	0.623474	-2.8897	0.00385615	0.0116785
WBGene00001663	gpa-1	26.2113	-1.80063	0.829166	-2.17161	0.029885	0.0676243
WBGene00016133	C26B9.3	1679.12	-1.80024	0.171315	-10.5083	7.9067e-26	2.59119e-24
WBGene00219575	anr-8	36.9843	-1.79901	0.629591	-2.85744	0.00427079	0.0127224
WBGene00044679	K02B12.9	6.1145	-1.79767	1.14158	-1.57472	0.115321	0.205649
WBGene00021976	Y58A7A.2	151.464	-1.79682	0.324527	-5.53673	3.08163e-08	2.48969e-07
WBGene00000280	cah-2	138.924	-1.79502	0.336546	-5.33366	9.62519e-08	7.16983e-07
WBGene00007653	cysl-1	1407.57	-1.79425	0.195021	-9.20031	3.56914e-20	8.52196e-19
WBGene00021439	ckr-2	194.366	-1.79238	0.258661	-6.92945	4.22483e-12	5.50586e-11
WBGene00021804	Y53G8AM.4	15.2798	-1.79194	0.881553	-2.03271	0.0420822	0.0903906
WBGene00012704	mlt-3	170.613	-1.7918	0.363584	-4.92817	8.30031e-07	5.35376e-06
WBGene00001190	egl-23	127.514	-1.79113	0.458067	-3.91019	9.22243e-05	0.00041036
WBGene00019717	trx-3	70.3995	-1.78983	0.419905	-4.26247	2.02179e-05	0.000103536
WBGene00001557	gcy-37	59.5508	-1.78935	0.454074	-3.94066	8.12562e-05	0.000366412
WBGene00012291	W06A7.2	132.667	-1.78725	0.321198	-5.56433	2.63167e-08	2.15349e-07
WBGene00021178	Y9C9A.8	46.5478	-1.78688	0.540128	-3.30826	0.000938783	0.00332428
WBGene00016863	cest-35.2	133.158	-1.7861	0.292662	-6.10293	1.04143e-09	1.03763e-08
WBGene00020740	T23F4.2	235.114	-1.78404	0.306358	-5.82339	5.76658e-09	5.17483e-08
WBGene00016260	rege-1	623.126	-1.7837	0.212886	-8.37865	5.3538e-17	1.03448e-15
WBGene00194681	F40D4.16	42.6031	-1.78292	0.54517	-3.2704	0.00107395	0.00374344
WBGene00011927	T22C8.6	49.319	-1.78027	0.623657	-2.85457	0.00430949	0.0128192
WBGene00013846	ZC84.1	1430.41	-1.77943	0.217594	-8.17775	2.89184e-16	5.26796e-15
WBGene00001952	hlh-6	48.3865	-1.77781	0.510917	-3.47964	0.000502092	0.00190345
WBGene00009311	mltn-1	107.14	-1.7776	0.374323	-4.74886	2.04568e-06	1.24784e-05
WBGene00020561	T19C3.3	16.203	-1.7772	0.781951	-2.27278	0.0230395	0.054303
WBGene00020420	T10E10.3	19.4412	-1.7748	0.848098	-2.09268	0.0363781	0.080094
WBGene00019227	sgca-1	449.578	-1.77241	0.251917	-7.0357	1.98264e-12	2.66968e-11
WBGene00007242	madf-5	704.708	-1.77153	0.189082	-9.36914	7.31272e-21	1.84836e-19
WBGene00014210	ZK1067.4	65.8673	-1.76957	0.417616	-4.23732	2.26201e-05	0.000114696
WBGene00009677	F44A6.5	127.745	-1.76917	0.312996	-5.65236	1.58256e-08	1.33926e-07
WBGene00206538	C09G5.13	36.5481	-1.76848	0.551705	-3.20547	0.0013484	0.00458748
WBGene00002011	hsp-12.2	713.251	-1.76583	0.257689	-6.85256	7.25408e-12	9.19377e-11
WBGene00194747	H05C05.4	12.162	-1.76556	0.926094	-1.90646	0.056591	0.115347
WBGene00007506	fbxc-58	17.077	-1.76396	0.840749	-2.09808	0.0358978	0.0791932
WBGene00006955	wrt-9	2542.97	-1.76373	0.230662	-7.64639	2.067e-14	3.3139e-13
WBGene00006919	vha-10	3913.63	-1.76351	0.265929	-6.63152	3.32252e-11	3.91758e-10
WBGene00201028	T03G6.6	14.1382	-1.76336	0.924492	-1.90738	0.0564718	0.115157
WBGene00173788	21ur-10110	7.32692	-1.76208	1.06536	-1.65398	0.0981314	0.180608
WBGene00010344	F59F5.5	41.7057	-1.76142	0.490549	-3.59071	0.000329784	0.00130653
WBGene00019859	R03H10.7	55.4592	-1.75873	0.475307	-3.7002	0.000215432	0.000886319
WBGene00020708	dmd-8	24.2645	-1.75814	0.648873	-2.70953	0.00673787	0.018911
WBGene00199405	T06H11.16	6.64622	-1.75807	1.17842	-1.49188	0.13573	0.234385
WBGene00021587	clec-76	21.483	-1.75788	0.885699	-1.98474	0.0471736	0.0990865
WBGene00013716	Y106G6H.1	326.418	-1.75698	0.255595	-6.87408	6.2393e-12	7.9453e-11
WBGene00013895	ZC434.9	294.22	-1.75698	0.286639	-6.12958	8.81122e-10	8.86492e-09
WBGene00017351	cutl-5	28.7416	-1.75646	0.658657	-2.66673	0.00765923	0.0211245
WBGene00007664	seb-3	284.803	-1.75566	0.288235	-6.09106	1.12163e-09	1.11009e-08
WBGene00003771	nlp-33	101.52	-1.75509	0.456185	-3.84733	0.000119413	0.00051941
WBGene00008377	D1054.10	109.385	-1.75362	1.49537	-1.17269	0.240918	0.367856
WBGene00009013	mrps-33	226.124	-1.75344	0.316476	-5.54051	3.01597e-08	2.44403e-07
WBGene00012178	glb-27	59.2148	-1.75323	0.479043	-3.65986	0.000252353	0.00102311
WBGene00006614	trp-1	143.119	-1.75171	0.397544	-4.40632	1.0514e-05	5.70778e-05
WBGene00002139	inx-17	397.078	-1.75106	0.23949	-7.3116	2.63971e-13	3.87438e-12
WBGene00006741	unc-1	1542.37	-1.75075	0.195847	-8.93938	3.91365e-19	8.70706e-18
WBGene00001189	egl-21	1326.12	-1.74661	0.222517	-7.84933	4.18268e-15	7.09729e-14
WBGene00016823	C50E3.12	28.9482	-1.74433	0.739598	-2.35849	0.0183495	0.0449032
WBGene00020908	VC5.2	129.285	-1.74285	0.371511	-4.69124	2.71555e-06	1.62429e-05
WBGene00219317	F31E3.12	36.5944	-1.74051	0.56965	-3.05541	0.00224756	0.0072572
WBGene00010987	R03C1.1	448.061	-1.74042	0.238452	-7.29885	2.90228e-13	4.24114e-12
WBGene00012989	Y48C3A.5	403.177	-1.73791	0.265953	-6.53466	6.37527e-11	7.29202e-10
WBGene00013264	Y57A10A.24	149.867	-1.73757	0.317407	-5.47426	4.39345e-08	3.45965e-07
WBGene00044894	Y71F9AR.4	30.9501	-1.73749	0.599596	-2.89777	0.00375832	0.0114106
WBGene00005712	srv-1	53.07	-1.73704	0.461488	-3.764	0.000167215	0.000704421
WBGene00020732	T23E7.2	7225.95	-1.7355	0.272661	-6.36505	1.95228e-10	2.13268e-09
WBGene00018795	F54C4.4	53.3256	-1.73499	0.496415	-3.49504	0.000473992	0.0018082
WBGene00012421	Y9C2UA.1	243.545	-1.7343	0.266342	-6.51156	7.43745e-11	8.41338e-10
WBGene00013693	Y105E8B.9	1042.06	-1.73315	0.209845	-8.2592	1.46655e-16	2.7273e-15
WBGene00015859	C16D9.4	168.003	-1.73142	0.32414	-5.34158	9.21404e-08	6.88273e-07
WBGene00016210	C29F5.1	3532.73	-1.73072	0.198388	-8.72394	2.68684e-18	5.71156e-17
WBGene00010569	scbp-2	52.4614	-1.72965	0.420774	-4.11063	3.94573e-05	0.000189957
WBGene00002056	ifc-2	2098.61	-1.72826	0.271735	-6.36011	2.01606e-10	2.20055e-09
WBGene00014300	D2023.1	512.726	-1.72818	0.290409	-5.95087	2.66716e-09	2.5044e-08
WBGene00009008	F21D5.3	269.911	-1.72689	0.293098	-5.89187	3.81861e-09	3.50196e-08
WBGene00018422	F44E2.9	80.3035	-1.72613	0.466608	-3.69932	0.00021618	0.000888851
WBGene00021495	sqst-2	17.9725	-1.72533	0.795962	-2.1676	0.0301888	0.0682194
WBGene00001478	fmo-3	51.1416	-1.72438	0.751487	-2.29462	0.0217547	0.0517924
WBGene00009877	F49C12.7	11.0367	-1.72338	0.94312	-1.82732	0.0676514	0.133162
WBGene00007557	C14A4.6	170.272	-1.72121	0.275809	-6.24057	4.35987e-10	4.54371e-09
WBGene00196679	F10G8.11	16.7077	-1.72073	0.774908	-2.22056	0.0263805	0.0608297
WBGene00000497	chs-2	2672.09	-1.72049	0.216931	-7.93108	2.17256e-15	3.75314e-14
WBGene00016023	prmt-6	24.6728	-1.71934	0.799528	-2.15044	0.0315201	0.0708329
WBGene00010146	glb-19	25.2918	-1.71925	0.674848	-2.54762	0.0108462	0.0285368
WBGene00021692	Y48G8AL.15	51.8547	-1.71904	0.521126	-3.2987	0.000971348	0.00342417
WBGene00001553	gcy-33	138.716	-1.71846	0.382354	-4.49441	6.97628e-06	3.90292e-05
WBGene00016242	C30A5.10	576.819	-1.7182	0.189068	-9.08771	1.01146e-19	2.35204e-18
WBGene00019986	R09F10.1	55.8838	-1.71657	0.447858	-3.83283	0.000126677	0.000546209
WBGene00017681	slc-17.5	77.2292	-1.7159	0.401035	-4.27867	1.88013e-05	9.68754e-05
WBGene00044637	rft-1	36.325	-1.7151	0.594569	-2.8846	0.00391907	0.0118503
WBGene00016024	glb-7	30.715	-1.71479	0.668824	-2.56388	0.0103509	0.0274117
WBGene00011713	T11F9.12	2104.73	-1.71102	0.205126	-8.34128	7.34895e-17	1.40576e-15
WBGene00015471	lmp-2	123.554	-1.71023	0.322106	-5.30953	1.09906e-07	8.12808e-07
WBGene00001477	fmo-2	245.359	-1.71022	0.319466	-5.35336	8.63367e-08	6.48544e-07
WBGene00020281	T06A4.1	599.513	-1.70895	0.309079	-5.52918	3.21738e-08	2.59623e-07
WBGene00198914	F25H8.15	10.6507	-1.70792	0.915681	-1.86519	0.0621549	0.124263
WBGene00004231	ptr-17	159.882	-1.7069	0.298518	-5.71791	1.07841e-08	9.33899e-08
WBGene00077690	mtp-18	16.0271	-1.70181	0.795302	-2.13982	0.0323691	0.0724849
WBGene00021807	Y53G8AM.7	12.3435	-1.70157	0.967547	-1.75864	0.0786382	0.150361
WBGene00045367	F17C11.15	57.4004	-1.69897	0.548562	-3.09714	0.00195397	0.00641458
WBGene00021543	Y43B11AR.1	301.352	-1.6989	0.277286	-6.1269	8.96095e-10	9.00202e-09
WBGene00236800	linc-171	13.5696	-1.6977	0.795215	-2.13489	0.0327702	0.0732603
WBGene00045190	R01H2.8	11.5146	-1.69715	1.02042	-1.66319	0.0962749	0.177803
WBGene00014261	shk-1	467.765	-1.69583	0.229049	-7.40382	1.32325e-13	1.97688e-12
WBGene00270320	F27D9.13	21.4502	-1.69552	0.656876	-2.58119	0.00984595	0.0262251
WBGene00004102	pqn-10	149.474	-1.69399	0.328176	-5.16184	2.4453e-07	1.72292e-06
WBGene00007593	C14H10.3	2373.68	-1.69129	0.176775	-9.56752	1.09501e-21	2.95189e-20
WBGene00006586	tni-4	1483.3	-1.69127	0.198509	-8.51984	1.5978e-17	3.17919e-16
WBGene00219678	linc-9	32.7541	-1.69095	0.568777	-2.97296	0.00294942	0.00922497
WBGene00006819	unc-87	1818.07	-1.69003	0.182191	-9.27613	1.75753e-20	4.3438e-19
WBGene00003986	mct-4	2884.5	-1.68934	0.21225	-7.9592	1.73161e-15	3.01476e-14
WBGene00000457	ceh-36	118.637	-1.68851	0.390788	-4.32078	1.55478e-05	8.15683e-05
WBGene00173663	21ur-9869	6.57396	-1.68568	1.19869	-1.40627	0.159644	0.266759
WBGene00010587	sol-2	208.954	-1.68503	0.268058	-6.28605	3.25641e-10	3.46116e-09
WBGene00019546	glct-6	104.329	-1.68301	0.373909	-4.50113	6.75946e-06	3.79432e-05
WBGene00012437	nmy-3	126.355	-1.68284	0.382083	-4.40437	1.06094e-05	5.75721e-05
WBGene00009617	slc-9B.1	549.503	-1.68261	0.222883	-7.54929	4.37638e-14	6.82012e-13
WBGene00009800	rrc-1	913.422	-1.68236	0.176766	-9.51742	1.77528e-21	4.69115e-20
WBGene00008260	C52G5.2	1398.77	-1.68231	0.192933	-8.71966	2.79036e-18	5.91282e-17
WBGene00000684	col-110	65.7079	-1.68086	0.452809	-3.71208	0.00020556	0.000849102
WBGene00004790	sgn-1	1271.81	-1.68049	0.208095	-8.07559	6.7151e-16	1.19717e-14
WBGene00000952	del-1	64.742	-1.67934	0.448044	-3.74816	0.000178136	0.000746665
WBGene00008731	F13B12.3	195.521	-1.67925	0.311174	-5.39652	6.79477e-08	5.18213e-07
WBGene00000281	cah-3	137.249	-1.67899	0.337455	-4.97545	6.50957e-07	4.27083e-06
WBGene00017299	molo-1	28.22	-1.67701	0.701229	-2.39153	0.0167783	0.0414299
WBGene00003179	mec-18	77.0902	-1.67575	0.375343	-4.4646	8.02195e-06	4.43413e-05
WBGene00012923	fbxa-128	24.6833	-1.67559	0.629378	-2.6623	0.0077609	0.0213574
WBGene00044007	ZK1320.13	22.0769	-1.67528	0.715972	-2.33988	0.0192902	0.0468196
WBGene00020808	clik-1	14273.6	-1.67375	0.228318	-7.33077	2.28836e-13	3.37351e-12
WBGene00017937	F30H5.3	32611.6	-1.67303	0.240331	-6.96137	3.36991e-12	4.4213e-11
WBGene00001000	dim-1	8308.04	-1.67116	0.209953	-7.95969	1.72469e-15	3.00663e-14
WBGene00001505	fut-1	150.136	-1.66887	0.297205	-5.6152	1.96332e-08	1.63765e-07
WBGene00007546	nhr-153	79.0454	-1.66694	0.372569	-4.47418	7.67049e-06	4.25922e-05
WBGene00010275	acc-1	150.502	-1.66527	0.334678	-4.97574	6.49987e-07	4.26655e-06
WBGene00019128	F59G1.4	173.204	-1.66463	0.37072	-4.49026	7.11378e-06	3.97486e-05
WBGene00007142	ttr-18	123.824	-1.66208	0.393832	-4.22028	2.43998e-05	0.000122928
WBGene00000007	aat-6	30.7535	-1.66117	0.716136	-2.31964	0.0203606	0.0490703
WBGene00000953	del-2	297.608	-1.66059	0.330317	-5.02725	4.97576e-07	3.34662e-06
WBGene00022562	ZC204.12	368.095	-1.66015	0.329681	-5.03564	4.76267e-07	3.213e-06
WBGene00017305	nspb-12	11.6924	-1.65974	0.924622	-1.79505	0.0726453	0.141081
WBGene00008042	C40H1.7	19.3473	-1.65949	0.757463	-2.19086	0.028462	0.0649652
WBGene00020196	T03G11.3	291.358	-1.65905	0.340131	-4.8777	1.0733e-06	6.80471e-06
WBGene00020989	W03D8.8	26.838	-1.65649	0.653086	-2.53641	0.0111997	0.0292768
WBGene00015942	osta-2	1598.43	-1.65629	0.192237	-8.61587	6.94135e-18	1.41916e-16
WBGene00022123	Y71F9AR.2	73.8592	-1.65604	0.465454	-3.5579	0.000373832	0.00146356
WBGene00013585	cyp-42A1	1273.46	-1.65529	0.200072	-8.27348	1.30099e-16	2.4432e-15
WBGene00021928	Y55F3AM.11	84.63	-1.65403	0.431255	-3.83538	0.00012537	0.000541621
WBGene00016204	gsto-1	15.6348	-1.65376	0.854701	-1.9349	0.0530021	0.109315
WBGene00006664	twk-9	32.9704	-1.65215	0.66519	-2.48373	0.0130016	0.0332461
WBGene00021133	tomm-22	127.006	-1.65123	0.36231	-4.55749	5.17686e-06	2.9708e-05
WBGene00020082	gcp-2.1	292.436	-1.65073	0.286183	-5.76808	8.0182e-09	7.05802e-08
WBGene00196397	F48C1.12	19.828	-1.65051	0.75631	-2.18232	0.0290863	0.0661759
WBGene00012669	Y39B6A.7	22.9533	-1.64771	0.789634	-2.08667	0.0369181	0.0810295
WBGene00019609	K10B3.1	381.451	-1.6454	0.23642	-6.95965	3.41107e-12	4.46714e-11
WBGene00017995	F32E10.8	21.8743	-1.64464	0.801882	-2.05098	0.0402691	0.0870554
WBGene00194917	Y45F10B.59	15.0279	-1.64444	0.81343	-2.02161	0.0432163	0.0923224
WBGene00194737	Y50D7A.13	36.7855	-1.64419	0.546006	-3.0113	0.00260132	0.00824811
WBGene00011020	R05A10.3	21.7453	-1.64317	0.811287	-2.02539	0.0428273	0.0917111
WBGene00020587	ugt-9	257.888	-1.63927	0.288812	-5.6759	1.37965e-08	1.17498e-07
WBGene00008229	C50F4.1	112.972	-1.63529	0.359822	-4.54471	5.50098e-06	3.13796e-05
WBGene00003106	mab-9	140.848	-1.63499	0.349323	-4.68044	2.86256e-06	1.70412e-05
WBGene00009432	cld-9	56.0767	-1.63221	0.443264	-3.68225	0.000231183	0.000944438
WBGene00006764	unc-27	2727.49	-1.63198	0.251358	-6.49265	8.43377e-11	9.50025e-10
WBGene00009109	degt-1	120.36	-1.63145	0.455226	-3.58382	0.000338606	0.00133831
WBGene00004146	pqn-63	171.455	-1.63007	0.34363	-4.74367	2.09879e-06	1.27675e-05
WBGene00019204	H14N18.4	110.087	-1.6295	0.387924	-4.20057	2.66247e-05	0.000133483
WBGene00003569	ncx-4	70.6957	-1.62826	0.392035	-4.15335	3.27639e-05	0.00016112
WBGene00003701	nhr-111	26.6865	-1.6275	0.661036	-2.46205	0.0138145	0.0350236
WBGene00020017	R12A1.3	904.262	-1.6269	0.23914	-6.80312	1.02379e-11	1.27697e-10
WBGene00013926	nep-1	1234.76	-1.62537	0.179464	-9.05678	1.34354e-19	3.09733e-18
WBGene00001633	gly-8	1594.68	-1.62443	0.234992	-6.91272	4.75449e-12	6.1601e-11
WBGene00006917	vha-8	8366.66	-1.62388	0.245219	-6.62215	3.54011e-11	4.16313e-10
WBGene00006925	vit-1	837.739	-1.62221	0.865636	-1.87401	0.0609284	0.12236
WBGene00008929	F18A11.2	757.706	-1.62184	0.19171	-8.45986	2.67709e-17	5.26402e-16
WBGene00010791	sodh-2	8.05325	-1.62183	1.02821	-1.57734	0.114717	0.204736
WBGene00022412	Y102A11A.2	744.634	-1.6205	0.197707	-8.19645	2.476e-16	4.53516e-15
WBGene00008932	F18A11.5	213.594	-1.62014	0.265815	-6.09499	1.09441e-09	1.08718e-08
WBGene00022650	ZK84.2	13.3024	-1.61935	0.869013	-1.86343	0.0624015	0.124682
WBGene00020855	hpo-36	1262.14	-1.61807	0.248442	-6.51287	7.37303e-11	8.34757e-10
WBGene00011736	T12D8.9	2674.26	-1.61648	0.188275	-8.58574	9.02571e-18	1.82576e-16
WBGene00022680	ZK180.6	559.355	-1.61605	0.286101	-5.64854	1.61819e-08	1.36682e-07
WBGene00010747	K10D11.3	44.55	-1.61544	0.602728	-2.68021	0.00735763	0.0203936
WBGene00044736	gfrp-1	95.6355	-1.61522	0.375208	-4.30488	1.67079e-05	8.71982e-05
WBGene00007893	C33B4.5	15.8943	-1.61493	0.821134	-1.96671	0.0492164	0.102519
WBGene00201523	M01A8.3	16.4456	-1.61485	0.773466	-2.08781	0.0368152	0.0808169
WBGene00016846	C50F7.6	421.595	-1.61377	0.295301	-5.46484	4.63331e-08	3.63568e-07
WBGene00001541	gcy-15	18.8578	-1.61313	0.714379	-2.25808	0.0239405	0.0560962
WBGene00016807	txt-1	24.1803	-1.61255	0.653954	-2.46585	0.0136688	0.0347129
WBGene00013592	Y81G3A.4	122.062	-1.61095	0.294102	-5.47752	4.31319e-08	3.39845e-07
WBGene00004912	sng-1	330.304	-1.61023	0.263509	-6.11072	9.91821e-10	9.92638e-09
WBGene00020385	nhr-216	25.217	-1.61016	0.665513	-2.41943	0.015545	0.0387783
WBGene00011384	not found	52.1143	-1.60907	0.463641	-3.47051	0.000519466	0.00195987
WBGene00021167	cyp-32B1	190.724	-1.60868	0.308868	-5.20833	1.90551e-07	1.36395e-06
WBGene00010972	R01H10.4	161.543	-1.60672	0.286031	-5.6173	1.93967e-08	1.61994e-07
WBGene00009665	lmd-1	83.5463	-1.60617	0.340463	-4.7176	2.38643e-06	1.44385e-05
WBGene00001620	glt-1	185.4	-1.60461	0.35979	-4.45985	8.20186e-06	4.52796e-05
WBGene00199562	T27B1.6	18.4398	-1.60446	0.834316	-1.92308	0.0544695	0.11179
WBGene00044612	Y57E12AR.1	110.029	-1.60311	0.35172	-4.55791	5.1664e-06	2.96608e-05
WBGene00016093	srsx-34	22.0329	-1.60221	0.697711	-2.29638	0.0216539	0.0516105
WBGene00201183	F12F6.18	25.678	-1.60209	0.782019	-2.04866	0.0404953	0.0874878
WBGene00001554	gcy-34	75.7658	-1.60116	0.481673	-3.32416	0.000886841	0.00315287
WBGene00015148	hpo-28	411	-1.59958	0.222315	-7.19508	6.24246e-13	8.7861e-12
WBGene00006705	ubc-8	260.637	-1.59891	0.298943	-5.34854	8.86665e-08	6.63436e-07
WBGene00195337	C31H2.5	24.0831	-1.59813	0.746917	-2.13964	0.032384	0.0725061
WBGene00010340	slcf-1	17.3106	-1.59806	0.792312	-2.01695	0.0437004	0.0931629
WBGene00010222	F57G12.2	215.527	-1.59634	0.327959	-4.86749	1.13027e-06	7.14215e-06
WBGene00011800	T16G1.6	22.8662	-1.59633	0.641426	-2.48872	0.0128204	0.0328332
WBGene00021852	Y54F10AM.8	558.08	-1.59601	0.225133	-7.08916	1.34927e-12	1.83906e-11
WBGene00016633	C44B11.1	40.7706	-1.59577	0.579803	-2.75226	0.00591847	0.0168949
WBGene00020022	gldc-1	937.511	-1.59425	0.206175	-7.73251	1.05444e-14	1.72781e-13
WBGene00016174	mfsd-13.2	125.863	-1.59403	0.339093	-4.70087	2.59055e-06	1.55747e-05
WBGene00006598	tor-2	71.3077	-1.59359	0.442851	-3.59849	0.000320074	0.00127221
WBGene00001428	fkb-3	3734.21	-1.59238	0.181538	-8.77163	1.76104e-18	3.77353e-17
WBGene00006064	sto-2	159.352	-1.59229	0.32067	-4.96551	6.85209e-07	4.4736e-06
WBGene00016100	C25E10.11	7.39401	-1.59204	1.1119	-1.43182	0.152195	0.256588
WBGene00015362	fbxa-105	100.249	-1.58992	0.361134	-4.40257	1.06978e-05	5.79817e-05
WBGene00000266	bre-1	3846.35	-1.5898	0.243401	-6.5316	6.50694e-11	7.41093e-10
WBGene00007269	C03C10.2	13.3333	-1.5898	0.787374	-2.01911	0.0434754	0.0928017
WBGene00020516	T15B7.1	14.544	-1.58878	0.75576	-2.10223	0.0355334	0.0785566
WBGene00022410	Y97E10C.1	9072.75	-1.58816	0.622631	-2.55073	0.0107498	0.0283187
WBGene00013477	Y69E1A.5	548.587	-1.58796	0.232606	-6.82684	8.68051e-12	1.08983e-10
WBGene00008064	C41G7.7	6.04896	-1.58785	1.18766	-1.33696	0.181237	0.294987
WBGene00046313	21ur-3912	12.9905	-1.58664	1.00063	-1.58564	0.112821	0.202027
WBGene00003166	mec-2	691.325	-1.58323	0.218289	-7.25293	4.07854e-13	5.8702e-12
WBGene00003959	pcp-4	62.9956	-1.58298	0.579166	-2.73321	0.00627208	0.0177678
WBGene00012013	ugt-54	135.869	-1.58217	0.316549	-4.99818	5.78743e-07	3.84039e-06
WBGene00006965	xtr-1	43.2352	-1.58193	0.718891	-2.20052	0.02777	0.0635592
WBGene00017756	F23F12.12	13.8977	-1.58192	0.885285	-1.78691	0.0739528	0.142955
WBGene00003843	2020-10-02	88.9741	-1.58172	0.416432	-3.79826	0.000145716	0.000622083
WBGene00004507	rpy-1	737.657	-1.58168	0.321266	-4.92325	8.51166e-07	5.47687e-06
WBGene00201250	C09H10.17	6.96166	-1.58134	1.10794	-1.42727	0.153501	0.258301
WBGene00004453	rpl-39	1277.93	-1.57915	0.26796	-5.89323	3.78709e-09	3.47544e-08
WBGene00020260	T05E7.4	102.873	-1.57668	0.373797	-4.21802	2.46456e-05	0.000123932
WBGene00008102	C44H9.7	112.705	-1.57543	0.324314	-4.85774	1.18735e-06	7.49225e-06
WBGene00012529	Y32F6A.4	147.021	-1.57493	0.426792	-3.69017	0.000224103	0.000918322
WBGene00006918	vha-9	580.02	-1.57391	0.216996	-7.25317	4.07118e-13	5.86592e-12
WBGene00010456	K01C8.1	49.1864	-1.57343	0.516368	-3.04712	0.00231049	0.00742634
WBGene00001695	grd-6	197.882	-1.57339	0.374778	-4.19821	2.69034e-05	0.000134628
WBGene00022191	Y71H2B.1	42.7905	-1.57206	0.481496	-3.26494	0.00109486	0.0038064
WBGene00019508	K07H8.8	27.082	-1.57015	0.6949	-2.25954	0.0238499	0.0559174
WBGene00044746	C53H9.3	37.1948	-1.56992	0.514065	-3.05394	0.0022586	0.00728406
WBGene00011523	T06D8.2	54.7795	-1.56944	0.513448	-3.05667	0.00223808	0.00723359
WBGene00008089	C44C10.9	205.687	-1.56833	0.29878	-5.24913	1.5282e-07	1.11165e-06
WBGene00200348	F26A10.22	13.2386	-1.56715	0.944488	-1.65926	0.0970632	0.178953
WBGene00005399	srh-184	15.9281	-1.56638	0.889037	-1.76189	0.0780885	0.149502
WBGene00015287	osta-1	24.6345	-1.56622	0.788179	-1.98714	0.0469069	0.0986151
WBGene00021994	Y59E9AL.4	21.3139	-1.56601	0.684692	-2.28717	0.0221858	0.0526155
WBGene00000668	col-93	19.2192	-1.56567	0.896116	-1.74718	0.0806065	0.153378
WBGene00010567	K04G2.9	441.695	-1.56557	0.270124	-5.79575	6.80171e-09	6.0429e-08
WBGene00018572	lin-42	3977.58	-1.56471	0.559447	-2.79689	0.00515975	0.015034
WBGene00004032	pkc-1	2440.15	-1.5636	0.169358	-9.23251	2.64367e-20	6.41535e-19
WBGene00009335	F32D8.13	10.8337	-1.56267	0.999862	-1.56289	0.118079	0.209589
WBGene00012610	Y38F1A.8	81.1877	-1.56241	0.452194	-3.45518	0.000549918	0.00206445
WBGene00017762	F23H11.7	108.577	-1.56178	0.361327	-4.32233	1.54387e-05	8.10807e-05
WBGene00015394	C03G6.6	10.2599	-1.5604	0.929966	-1.67791	0.0933644	0.173247
WBGene00004009	pgp-15	20.5415	-1.56031	0.856978	-1.82071	0.0686513	0.134892
WBGene00019144	H01M10.2	68.1451	-1.5601	0.448887	-3.47548	0.000509947	0.00192886
WBGene00200622	F46F3.16	18.6357	-1.55932	0.811739	-1.92096	0.054737	0.112201
WBGene00008977	iglr-1	457.31	-1.55931	0.256454	-6.08029	1.19968e-09	1.18209e-08
WBGene00007605	hrg-7	260.69	-1.55793	0.282416	-5.51642	3.45973e-08	2.77838e-07
WBGene00000273	brp-1	7362.36	-1.55779	0.211212	-7.37545	1.63788e-13	2.42525e-12
WBGene00007533	cbl-1	240.389	-1.55753	0.2964	-5.25483	1.48164e-07	1.08079e-06
WBGene00011309	R186.8	41.336	-1.55742	0.482682	-3.22659	0.00125275	0.00429281
WBGene00009818	acbp-3	938.963	-1.55707	0.344378	-4.52139	6.14346e-06	3.47627e-05
WBGene00006541	tbh-1	126.283	-1.55564	1.34935	-1.15288	0.248959	0.377161
WBGene00000526	clc-5	360.01	-1.55467	0.280514	-5.54224	2.98625e-08	2.42436e-07
WBGene00044221	F41G3.18	23.7167	-1.55345	0.717227	-2.16591	0.0303182	0.0684656
WBGene00017260	F08F3.1	33.8626	-1.5528	0.523312	-2.96726	0.00300468	0.00936899
WBGene00022033	Y65B4BL.1	10451.9	-1.55198	0.250539	-6.19456	5.84492e-10	5.99328e-09
WBGene00010830	M02G9.1	4081.48	-1.55166	0.256915	-6.03959	1.54502e-09	1.49916e-08
WBGene00001136	eat-5	115.466	-1.55135	0.389543	-3.98248	6.81995e-05	0.000311759
WBGene00021960	tmem-258	270.287	-1.55072	0.326505	-4.74946	2.03965e-06	1.24531e-05
WBGene00008890	ser-5	194.612	-1.54856	0.296734	-5.21869	1.80195e-07	1.29398e-06
WBGene00004831	slo-2	462.865	-1.54842	0.219334	-7.05963	1.66944e-12	2.2639e-11
WBGene00001957	hlh-13	44.4022	-1.54776	0.486026	-3.18452	0.00144993	0.0049019
WBGene00201557	C03A3.7	7.91189	-1.54763	1.0534	-1.46917	0.141788	0.242405
WBGene00023314	H31G24.2	25.5884	-1.54752	0.627615	-2.46572	0.0136738	0.0347129
WBGene00018879	F55D10.4	22.1319	-1.54638	0.784216	-1.97188	0.0486238	0.101602
WBGene00016744	bbs-9	228.61	-1.5446	0.292014	-5.28948	1.22662e-07	9.03143e-07
WBGene00015919	C17G10.7	23.5309	-1.54331	0.814391	-1.89504	0.0580865	0.117874
WBGene00022242	sfrp-1	766.759	-1.54308	0.236646	-6.52061	7.00204e-11	7.93647e-10
WBGene00019538	K08D12.4	85.5038	-1.54	0.572999	-2.68761	0.00719654	0.0199969
WBGene00020309	T07D3.6	57.2955	-1.53993	0.422009	-3.64905	0.000263214	0.00106327
WBGene00000391	cdd-1	90.8347	-1.53601	0.380285	-4.0391	5.3657e-05	0.000252002
WBGene00044705	T22F3.12	20.4568	-1.536	0.716238	-2.14453	0.0319904	0.071769
WBGene00006055	ssr-2	69.2476	-1.53549	0.478259	-3.21058	0.00132469	0.00451274
WBGene00000442	ceh-19	20.7873	-1.53467	0.830615	-1.84763	0.0646562	0.128267
WBGene00006533	tba-7	43.0312	-1.5341	0.569773	-2.69248	0.00709236	0.0197567
WBGene00018418	F44E2.4	13604.7	-1.53369	0.15425	-9.94287	2.70907e-23	7.87455e-22
WBGene00020283	T06A4.3	315.598	-1.53279	0.264986	-5.78441	7.2767e-09	6.43719e-08
WBGene00007416	ceh-57	31.1905	-1.53209	0.687975	-2.22696	0.0259499	0.0600617
WBGene00006694	twk-44	21.6724	-1.53153	0.729074	-2.10065	0.0356717	0.0787982
WBGene00017226	fbxa-53	33.2701	-1.52979	0.539751	-2.83426	0.00459325	0.0135727
WBGene00016273	C30G12.1	239.339	-1.52932	0.331322	-4.6158	3.91579e-06	2.28438e-05
WBGene00013046	Y50E8A.1	57.3704	-1.52826	0.407232	-3.7528	0.000174874	0.000734832
WBGene00009108	F25D1.3	22.2683	-1.52814	0.844073	-1.81044	0.0702279	0.137364
WBGene00007695	cest-9.2	141.645	-1.52787	0.367634	-4.15595	3.2394e-05	0.0001596
WBGene00044743	crb-3	192.514	-1.52589	0.262137	-5.82099	5.85016e-09	5.23928e-08
WBGene00004182	prk-1	204.246	-1.52581	0.274987	-5.54865	2.87879e-08	2.34566e-07
WBGene00003816	asns-1	403.955	-1.52555	0.276852	-5.51035	3.58112e-08	2.86554e-07
WBGene00000492	che-13	210.906	-1.52533	0.300394	-5.07777	3.81899e-07	2.61195e-06
WBGene00017340	F10D7.3	47.5478	-1.52524	0.49389	-3.08822	0.00201361	0.00657939
WBGene00013027	Y49A3A.4	24.4293	-1.52424	0.636223	-2.39577	0.0165856	0.0410375
WBGene00015793	C15C7.7	133.547	-1.52405	0.3153	-4.83364	1.34056e-06	8.40347e-06
WBGene00006669	twk-14	47.0004	-1.52404	0.547541	-2.78342	0.00537891	0.0155768
WBGene00016092	cyp-33B1	32.7197	-1.52141	0.598637	-2.54146	0.011039	0.0289472
WBGene00007802	cutl-27	156.413	-1.52105	0.322506	-4.71633	2.40139e-06	1.45093e-05
WBGene00003844	odc-1	7543.68	-1.51979	0.167827	-9.0557	1.35691e-19	3.12275e-18
WBGene00011571	ttr-46	227.995	-1.51836	0.281364	-5.39643	6.79788e-08	5.18213e-07
WBGene00003371	mlc-3	11318.5	-1.51714	0.237748	-6.3813	1.75587e-10	1.92756e-09
WBGene00003991	pfn-3	245.362	-1.51666	0.252034	-6.01767	1.76945e-09	1.7078e-08
WBGene00011083	glo-1	49.1362	-1.51617	0.443291	-3.42026	0.000625614	0.00230702
WBGene00011573	anmt-3	671.107	-1.51221	0.258235	-5.85594	4.74309e-09	4.30549e-08
WBGene00004796	sid-2	72.0039	-1.51183	0.52731	-2.86707	0.00414291	0.0124343
WBGene00016742	C48B6.4	53.5491	-1.51117	0.46199	-3.27099	0.00107171	0.0037366
WBGene00010192	F57B7.2	230.562	-1.51075	0.303986	-4.9698	6.70219e-07	4.38644e-06
WBGene00007339	C05D12.1	235.081	-1.51069	0.295958	-5.1044	3.31841e-07	2.2978e-06
WBGene00012168	W01A8.6	188.434	-1.51062	0.360481	-4.19057	2.78256e-05	0.000138827
WBGene00017574	pxmp-4	45.817	-1.5098	0.522327	-2.89052	0.00384603	0.0116526
WBGene00003162	mdh-2	754.264	-1.50962	0.192166	-7.8558	3.97216e-15	6.74863e-14
WBGene00195063	coa-1	133.552	-1.5081	0.326256	-4.62245	3.79238e-06	2.21819e-05
WBGene00023414	R01H2.7	33.6035	-1.50702	0.513066	-2.93728	0.00331102	0.0102055
WBGene00009029	F21H7.3	100.604	-1.5066	0.373301	-4.03588	5.4397e-05	0.000254879
WBGene00012779	cdkl-1	87.2567	-1.50652	0.497642	-3.02732	0.00246733	0.0078624
WBGene00009625	F41E7.9	69.7726	-1.50521	0.374038	-4.02421	5.71678e-05	0.000266617
WBGene00004211	ptd-2	85.6097	-1.50496	0.40112	-3.7519	0.000175502	0.00073701
WBGene00012261	lpr-3	15356.2	-1.5048	0.200495	-7.50545	6.12173e-14	9.4262e-13
WBGene00007641	C17E4.1	52.5282	-1.5038	0.571635	-2.6307	0.008521	0.0232392
WBGene00004285	rab-37	59.3378	-1.50305	0.481921	-3.11887	0.00181547	0.00600114
WBGene00194851	K07C10.3	49.8911	-1.50188	0.701329	-2.14148	0.0322356	0.0722754
WBGene00004497	rps-28	3655.52	-1.50164	0.263249	-5.70425	1.16855e-08	1.00545e-07
WBGene00010632	K07C5.9	19.0553	-1.50038	0.830261	-1.80712	0.0707434	0.13823
WBGene00048195	21ur-484	5.89618	-1.49932	1.24608	-1.20323	0.228886	0.354013
WBGene00010769	asah-1	196.432	-1.49814	0.334905	-4.47333	7.70117e-06	4.27271e-05
WBGene00013043	arrd-16	32.2182	-1.49687	0.577928	-2.59006	0.00959594	0.0257232
WBGene00019448	frpr-13	62.8598	-1.49686	0.453878	-3.29793	0.000974008	0.00343084
WBGene00003525	nas-6	164.709	-1.4962	0.374345	-3.99685	6.4192e-05	0.000295155
WBGene00219729	anr-44	52.7379	-1.49473	0.54224	-2.75658	0.00584099	0.016713
WBGene00003400	dapk-1	5029	-1.49428	0.212403	-7.03513	1.99082e-12	2.67799e-11
WBGene00009433	F35E12.9	287.772	-1.49161	0.267114	-5.58415	2.34839e-08	1.93352e-07
WBGene00007409	C07B5.4	197.619	-1.49144	0.285427	-5.2253	1.73869e-07	1.25326e-06
WBGene00003370	mlc-2	6204.69	-1.49139	0.195388	-7.63294	2.29465e-14	3.65695e-13
WBGene00012175	W01C9.1	91.253	-1.49077	0.36592	-4.07403	4.62059e-05	0.00021963
WBGene00007679	C18D11.1	1013.17	-1.49051	0.191491	-7.78373	7.04158e-15	1.16815e-13
WBGene00007285	C04A11.1	157.876	-1.49024	0.270554	-5.50811	3.62703e-08	2.89708e-07
WBGene00020691	igdb-3	52.4514	-1.48979	0.481886	-3.09157	0.00199099	0.00651371
WBGene00000458	ceh-37	383.631	-1.48841	0.220203	-6.75924	1.3872e-11	1.70012e-10
WBGene00000035	ace-1	367.597	-1.48839	0.242421	-6.13971	8.26726e-10	8.3807e-09
WBGene00018517	F46G11.4	115.349	-1.48744	0.557603	-2.66757	0.00764027	0.0210766
WBGene00018188	F38E9.6	38.9221	-1.48701	0.74932	-1.98448	0.0472027	0.0991122
WBGene00013761	Y113G7B.11	27.0588	-1.48633	0.618637	-2.40259	0.0162796	0.04034
WBGene00020590	T19H12.6	307.704	-1.48595	0.277408	-5.35655	8.48244e-08	6.38979e-07
WBGene00009741	drr-1	108.592	-1.4853	0.358914	-4.13831	3.49875e-05	0.000170487
WBGene00012917	Y46G5A.29	83.4611	-1.48529	0.648146	-2.2916	0.0219288	0.052117
WBGene00021814	mfsd-8	80.1713	-1.48516	0.442011	-3.36001	0.000779409	0.002806
WBGene00001054	dpf-1	210.905	-1.48417	0.354511	-4.18653	2.83248e-05	0.000141212
WBGene00023432	K12B6.9	13.8904	-1.48397	0.853998	-1.73767	0.0822693	0.156164
WBGene00012557	Y37D8A.19	23.6896	-1.48266	0.870415	-1.70339	0.088495	0.16591
WBGene00008742	F13D12.8	93.3406	-1.48197	0.452928	-3.27198	0.00106798	0.00372456
WBGene00044021	R02E4.2	38.5487	-1.47958	0.715703	-2.06731	0.0387053	0.0843704
WBGene00008220	C50B6.7	61.367	-1.47704	0.426486	-3.46329	0.000533618	0.00200816
WBGene00195970	F52B10.6	29.2463	-1.47695	0.593023	-2.49055	0.0127546	0.0327085
WBGene00009183	F27C8.2	107.712	-1.47683	0.4368	-3.38103	0.000722145	0.00262101
WBGene00008348	C56G7.3	119.261	-1.47636	0.343844	-4.2937	1.75717e-05	9.11371e-05
WBGene00016734	C46H11.10	160.347	-1.47626	0.332079	-4.44552	8.76786e-06	4.82052e-05
WBGene00006754	unc-15	36433.6	-1.4757	0.253779	-5.8149	6.06697e-09	5.41532e-08
WBGene00006643	tsp-17	705.327	-1.47566	0.193943	-7.60876	2.76732e-14	4.38411e-13
WBGene00016428	dmsr-7	104.197	-1.47451	0.352255	-4.18592	2.84015e-05	0.000141489
WBGene00015047	faah-1	198.999	-1.47284	0.33777	-4.36048	1.29776e-05	6.92708e-05
WBGene00021980	glb-32	37.4602	-1.4726	0.499413	-2.94867	0.00319144	0.00988194
WBGene00200129	F49E10.20	24.1057	-1.47229	0.668602	-2.20204	0.0276624	0.0633396
WBGene00000981	dhs-18	148.504	-1.47199	0.373657	-3.93941	8.16807e-05	0.000367976
WBGene00020806	T25F10.3	1107.72	-1.47007	0.224902	-6.5365	6.29744e-11	7.21535e-10
WBGene00003534	nas-15	418.852	-1.46985	0.300336	-4.89401	9.88034e-07	6.29995e-06
WBGene00195936	C02D5.5	14.3515	-1.46894	0.783414	-1.87505	0.0607854	0.122146
WBGene00010010	gmeb-2	1749.2	-1.46894	0.208327	-7.05113	1.77464e-12	2.39684e-11
WBGene00019732	M02D8.6	22.2812	-1.46543	0.873659	-1.67735	0.0934742	0.173421
WBGene00012222	W03C9.6	350.142	-1.46475	0.240221	-6.09751	1.07732e-09	1.071e-08
WBGene00021979	Y58A7A.5	416.553	-1.46474	0.207558	-7.05703	1.70103e-12	2.30208e-11
WBGene00020229	T05A8.3	347.981	-1.46284	0.273315	-5.35223	8.68786e-08	6.52248e-07
WBGene00021244	Y22D7AL.4	63.1434	-1.4625	0.42111	-3.47297	0.000514734	0.00194531
WBGene00000784	cpr-4	181.564	-1.46244	0.361977	-4.04016	5.34156e-05	0.000251044
WBGene00018073	F35H10.10	11361.3	-1.46223	0.146912	-9.9531	2.4444e-23	7.18332e-22
WBGene00020748	nhr-221	10.219	-1.46132	1.00651	-1.45188	0.146536	0.249342
WBGene00007271	C03C10.5	150.765	-1.4609	0.29096	-5.02097	5.14124e-07	3.44953e-06
WBGene00015088	B0252.3	31.062	-1.46024	0.70935	-2.05857	0.0395358	0.0858867
WBGene00022737	tofu-7	16.0638	-1.45944	0.79473	-1.8364	0.0662986	0.131
WBGene00018376	F43C9.2	37.3828	-1.4594	0.724699	-2.0138	0.0440306	0.0937323
WBGene00009428	F35E12.4	8.19823	-1.45939	1.18702	-1.22945	0.218903	0.342098
WBGene00019014	F57C12.2	119.193	-1.45787	0.330401	-4.41242	1.02222e-05	5.56067e-05
WBGene00199291	R02D5.15	10.7595	-1.45675	0.935096	-1.55786	0.119266	0.211303
WBGene00015002	B0034.1	38.4124	-1.45653	0.530408	-2.74606	0.00603153	0.0171664
WBGene00017194	F07C3.3	38.3804	-1.45568	0.505581	-2.87921	0.00398669	0.0120248
WBGene00168035	21ur-9115	8.49353	-1.45533	1.07586	-1.35271	0.176147	0.288317
WBGene00195017	srpr-2.2	2378.27	-1.45506	0.338491	-4.29867	1.71825e-05	8.93958e-05
WBGene00017176	nmur-3	53.7509	-1.4548	0.561851	-2.5893	0.0096172	0.0257647
WBGene00015110	B0281.3	14.4545	-1.4542	0.939514	-1.54782	0.121666	0.214844
WBGene00016239	C30A5.4	24.6909	-1.45395	0.664674	-2.18746	0.0287088	0.0654278
WBGene00022827	ZK816.4	126.592	-1.45371	0.417265	-3.48391	0.000494143	0.00187651
WBGene00202112	T27B1.8	8.17955	-1.45256	1.06509	-1.36379	0.172635	0.283621
WBGene00003570	ncx-5	28.6916	-1.45196	0.557327	-2.60521	0.00918172	0.0247368
WBGene00001455	flp-12	64.6661	-1.45121	0.497706	-2.91579	0.00354794	0.0108458
WBGene00002025	hsp-60	4120.61	-1.45056	0.159439	-9.09787	9.21234e-20	2.14971e-18
WBGene00011262	pho-8	25.3255	-1.4501	0.668612	-2.16882	0.0300964	0.0680796
WBGene00013989	ZK512.11	96.19	-1.44986	0.442202	-3.27873	0.00104275	0.00364038
WBGene00006654	ttx-3	90.3419	-1.4492	0.390226	-3.71375	0.000204208	0.0008443
WBGene00196749	F54D12.14	5.11203	-1.44892	1.25066	-1.15853	0.246649	0.374468
WBGene00018573	oac-30	37.8122	-1.44833	0.559526	-2.58849	0.00963983	0.0258046
WBGene00017881	asp-13	77.0393	-1.44788	0.373387	-3.8777	0.000105448	0.000464105
WBGene00044026	cisd-1	221.573	-1.44771	0.2665	-5.43233	5.56234e-08	4.30405e-07
WBGene00003607	nhr-8	224.243	-1.44752	0.241637	-5.99049	2.09214e-09	1.98538e-08
WBGene00007397	C07A4.2	12.2534	-1.4469	0.894385	-1.61776	0.105715	0.191923
WBGene00006535	tba-9	164.654	-1.44592	0.31622	-4.57252	4.81889e-06	2.77372e-05
WBGene00015358	not found	7.62943	-1.44586	1.06741	-1.35455	0.175562	0.2875
WBGene00007252	mlt-2	235.256	-1.44556	0.268736	-5.3791	7.48597e-08	5.6711e-07
WBGene00001990	hot-5	208.276	-1.44307	0.33944	-4.25132	2.12519e-05	0.000108582
WBGene00011765	frpr-17	56.5742	-1.44301	0.487403	-2.96061	0.00307033	0.00953621
WBGene00009291	clec-264	152.002	-1.44192	0.286022	-5.0413	4.6238e-07	3.12563e-06
WBGene00012863	Y45F3A.8	145.694	-1.44144	0.325495	-4.42847	9.49057e-06	5.18799e-05
WBGene00009373	F34D10.3	46.596	-1.44068	0.446378	-3.2275	0.00124879	0.00428196
WBGene00189933	F38B7.11	6.23071	-1.44042	1.14001	-1.26351	0.206404	0.326359
WBGene00007685	C18E9.5	307.275	-1.4386	0.242514	-5.93206	2.99156e-09	2.77972e-08
WBGene00000441	ceh-18	400.156	-1.43794	0.272056	-5.28544	1.25405e-07	9.22324e-07
WBGene00003730	nhx-2	494.984	-1.43747	0.19286	-7.45346	9.09239e-14	1.37372e-12
WBGene00219343	Y17D7C.9	23.7973	-1.43668	0.732483	-1.96138	0.0498346	0.103613
WBGene00012662	Y39A1C.1	46.0137	-1.43586	0.453205	-3.16824	0.00153365	0.00515584
WBGene00010758	vnut-1	365.634	-1.43571	0.282562	-5.08105	3.75357e-07	2.57366e-06
WBGene00235315	Y50D4A.10	34.0104	-1.43344	0.604801	-2.37011	0.017783	0.0436206
WBGene00002037	hum-4	12345.8	-1.43148	0.162311	-8.81935	1.15126e-18	2.48683e-17
WBGene00011476	exc-12	417.544	-1.43125	0.297957	-4.80356	1.55873e-06	9.65789e-06
WBGene00008449	E01G6.1	1762.71	-1.43029	0.223303	-6.40516	1.50214e-10	1.65855e-09
WBGene00021837	Y54E10BL.1	26.1512	-1.42977	0.69091	-2.0694	0.0385086	0.0840375
WBGene00007604	xbx-9	77.8352	-1.42933	0.401249	-3.56221	0.000367747	0.00144071
WBGene00007692	cest-9.1	30.6665	-1.42887	0.637722	-2.24059	0.0250527	0.0582775
WBGene00001664	gpa-2	43.388	-1.42883	0.532867	-2.6814	0.00733141	0.0203294
WBGene00196274	C09D8.4	6.21869	-1.42581	1.1185	-1.27476	0.202395	0.321759
WBGene00019067	F58H7.1	146.628	-1.42561	0.349651	-4.07725	4.55719e-05	0.000216925
WBGene00012176	W01C9.2	72.0942	-1.42493	0.418767	-3.40267	0.000667317	0.00244524
WBGene00009850	F48F7.5	369.439	-1.42403	0.265245	-5.36874	7.92903e-08	5.99656e-07
WBGene00044644	B0205.13	13.0881	-1.42401	0.898216	-1.58537	0.112882	0.202081
WBGene00002978	lev-11	17057.5	-1.42374	0.205755	-6.91957	4.53026e-12	5.87528e-11
WBGene00017666	F21E9.2	142.487	-1.42276	0.315984	-4.50263	6.71162e-06	3.76905e-05
WBGene00019428	dgk-5	259.492	-1.42191	0.249046	-5.70946	1.13337e-08	9.77692e-08
WBGene00197163	B0495.15	20.6128	-1.42148	0.764902	-1.85838	0.0631154	0.125896
WBGene00219915	F26A10.28	57.7046	-1.42111	0.611569	-2.32371	0.0201408	0.0486457
WBGene00022154	drag-1	271.44	-1.42023	0.2784	-5.1014	3.37142e-07	2.33209e-06
WBGene00022797	best-24	220.016	-1.41961	0.332052	-4.27526	1.90912e-05	9.81423e-05
WBGene00017658	F21C10.9	22.4927	-1.4196	0.810588	-1.75132	0.0798912	0.152256
WBGene00009843	F48C5.2	66.8922	-1.41937	0.402219	-3.52884	0.000417383	0.00161436
WBGene00002021	hsp-17	48.5208	-1.41919	0.522725	-2.71499	0.0066278	0.0186412
WBGene00200598	C07G2.4	74.331	-1.41868	0.50833	-2.79086	0.00525682	0.0152802
WBGene00000233	avr-15	134.482	-1.41754	0.370812	-3.82279	0.000131948	0.000566379
WBGene00014198	ZK1053.3	91.0708	-1.41712	0.388738	-3.64543	0.000266944	0.00107671
WBGene00021870	samt-1	1440.71	-1.41642	0.274562	-5.15882	2.48509e-07	1.74977e-06
WBGene00017637	F20D6.8	42.9836	-1.41569	0.555222	-2.54977	0.0107795	0.0283838
WBGene00013077	ttr-24	37.7292	-1.41527	0.577734	-2.4497	0.0142976	0.0360807
WBGene00017798	slc-17.8	198.649	-1.41522	0.285321	-4.96007	7.04669e-07	4.58944e-06
WBGene00016627	C44B7.5	98.9548	-1.41447	0.591085	-2.393	0.0167112	0.0413022
WBGene00018219	F40A3.4	30.64	-1.41416	0.649807	-2.17628	0.0295346	0.0670015
WBGene00010944	M176.5	197.08	-1.41285	0.271217	-5.20932	1.89537e-07	1.35815e-06
WBGene00017322	clec-160	32.8942	-1.4128	0.52204	-2.70631	0.00680359	0.0190635
WBGene00004346	rgs-3	275.59	-1.41258	0.234744	-6.01753	1.77095e-09	1.7078e-08
WBGene00018581	not found	378.421	-1.41222	0.281811	-5.01122	5.40848e-07	3.61403e-06
WBGene00012289	W05H12.1	985.283	-1.41189	0.22456	-6.28737	3.22882e-10	3.43731e-09
WBGene00006584	tni-1	3793.42	-1.4103	0.163981	-8.60041	7.94298e-18	1.61899e-16
WBGene00000065	act-3	7047.68	-1.41002	0.246372	-5.72313	1.04578e-08	9.09766e-08
WBGene00013025	vha-13	13816.8	-1.40994	0.180239	-7.82264	5.17283e-15	8.67828e-14
WBGene00195374	R10E8.10	18.1742	-1.40887	0.749377	-1.88005	0.0601007	0.121226
WBGene00008528	F02E9.1	56.5469	-1.40846	0.469894	-2.99739	0.002723	0.00859316
WBGene00003375	mlp-1	1531.99	-1.40836	0.196875	-7.1536	8.45312e-13	1.17491e-11
WBGene00002141	inx-19	121.08	-1.40742	0.329393	-4.27278	1.93052e-05	9.91662e-05
WBGene00196138	C05B10.14	10.3141	-1.40732	0.909093	-1.54804	0.121612	0.214777
WBGene00220175	Y51H4A.939	25.7704	-1.40704	0.852479	-1.65053	0.0988347	0.181652
WBGene00018275	F41C3.11	199.655	-1.40651	0.256395	-5.48571	4.11815e-08	3.25821e-07
WBGene00196188	F15C11.4	9.16392	-1.40511	1.02504	-1.37079	0.170441	0.280835
WBGene00006886	vap-1	36.0048	-1.40472	0.520103	-2.70086	0.00691603	0.019338
WBGene00017616	F20A1.4	15.4683	-1.40448	0.91335	-1.53772	0.124116	0.218334
WBGene00045250	Y73B6BL.47	64.5836	-1.40393	0.480585	-2.92129	0.0034858	0.0106852
WBGene00004450	rpl-36	1230.32	-1.40208	0.221976	-6.31634	2.67823e-10	2.87405e-09
WBGene00006913	vha-4	2148.69	-1.4019	0.320532	-4.37366	1.22178e-05	6.53982e-05
WBGene00007495	C09G9.5	87.9114	-1.40185	0.562707	-2.49126	0.0127292	0.0326495
WBGene00022197	Y71H2B.8	43.3743	-1.40128	0.509683	-2.74933	0.00597178	0.0170253
WBGene00008320	slc-25A29	75.6447	-1.40001	0.381188	-3.67275	0.000239951	0.000976083
WBGene00009971	F53C11.1	21.5418	-1.39994	0.624865	-2.24039	0.0250654	0.0582962
WBGene00019064	myo-5	3857.28	-1.39859	0.180931	-7.72997	1.07569e-14	1.76047e-13
WBGene00016865	ets-9	193.856	-1.39835	0.281606	-4.96561	6.84845e-07	4.4734e-06
WBGene00001774	gst-26	23.0023	-1.39779	0.671754	-2.08081	0.0374513	0.0820516
WBGene00201020	K04A8.16	25.8689	-1.39733	0.812932	-1.71888	0.0856368	0.161343
WBGene00012583	clec-4	51.5869	-1.39678	0.50902	-2.74406	0.0060685	0.0172586
WBGene00010256	hrg-3	12.8739	-1.39657	0.870856	-1.60367	0.108787	0.19646
WBGene00003658	nhr-68	131.075	-1.39649	0.303622	-4.59945	4.23614e-06	2.46053e-05
WBGene00044283	spp-22	144.942	-1.39649	0.321765	-4.34009	1.42424e-05	7.54498e-05
WBGene00009874	F49C12.4	12.3974	-1.39482	0.88811	-1.57055	0.116288	0.206931
WBGene00015019	B0205.4	112.79	-1.39378	0.480451	-2.90099	0.00371985	0.0113068
WBGene00044070	set-18	1065.85	-1.39352	0.19462	-7.16023	8.05418e-13	1.12297e-11
WBGene00004452	rpl-38	13570.3	-1.39336	0.207169	-6.72571	1.74742e-11	2.126e-10
WBGene00000716	col-143	47.683	-1.39272	0.740041	-1.88195	0.0598421	0.120759
WBGene00011446	T04F8.8	36.5816	-1.39195	0.630176	-2.20882	0.027187	0.0624289
WBGene00046099	21ur-2017	8.39261	-1.39193	1.06108	-1.3118	0.189586	0.305306
WBGene00016069	C24H10.3	510.443	-1.39169	0.278128	-5.00377	5.62209e-07	3.74367e-06
WBGene00021148	W10G11.19	67.6673	-1.39078	0.452044	-3.07666	0.00209334	0.00681686
WBGene00009371	F33H2.8	494.256	-1.39062	0.231181	-6.01529	1.79565e-09	1.7298e-08
WBGene00006921	vha-12	21740.4	-1.3901	0.221329	-6.28069	3.37068e-10	3.55998e-09
WBGene00198414	T22B2.8	14.4736	-1.38983	0.886158	-1.56838	0.116794	0.207749
WBGene00011963	T23G5.3	109.069	-1.38895	0.35655	-3.89553	9.79846e-05	0.000434113
WBGene00016974	lron-15	559.028	-1.38878	0.222548	-6.24036	4.36567e-10	4.54621e-09
WBGene00008020	C38H2.3	24.2372	-1.38824	0.773334	-1.79513	0.0726323	0.141076
WBGene00044132	C23H4.8	34.8371	-1.38708	0.54693	-2.53613	0.0112086	0.0292887
WBGene00012487	Y18D10A.23	44.3854	-1.38579	0.605246	-2.28964	0.0220423	0.0523402
WBGene00002123	inx-1	1363.57	-1.38565	0.26035	-5.32226	1.02484e-07	7.6044e-07
WBGene00002257	lbp-5	222.053	-1.38546	0.240788	-5.75386	8.7228e-09	7.64804e-08
WBGene00006568	thk-1	742.291	-1.38503	0.217559	-6.36623	1.93728e-10	2.11976e-09
WBGene00198142	F26F12.13	16.7575	-1.38457	0.745404	-1.85747	0.0632443	0.126093
WBGene00006912	vha-3	569.991	-1.38329	0.346822	-3.98847	6.65004e-05	0.00030493
WBGene00009547	F38H4.3	157.808	-1.38186	0.291192	-4.74551	2.07979e-06	1.26692e-05
WBGene00003934	pat-10	12582.2	-1.38176	0.186932	-7.39177	1.44887e-13	2.15254e-12
WBGene00000611	col-34	3441.26	-1.38151	0.303421	-4.55312	5.28563e-06	3.02927e-05
WBGene00010644	K07G5.5	51.9448	-1.38038	0.438946	-3.14475	0.0016623	0.00554617
WBGene00044686	flp-28	57.5891	-1.38028	0.468116	-2.94858	0.00319236	0.00988194
WBGene00002058	ifd-2	1021.61	-1.37912	0.221838	-6.2168	5.07398e-10	5.24704e-09
WBGene00046355	21ur-4549	10.6793	-1.37814	0.925759	-1.48866	0.136577	0.235574
WBGene00020128	R193.2	2522.75	-1.37792	0.218468	-6.3072	2.84121e-10	3.04405e-09
WBGene00015538	sams-3	172.75	-1.37756	0.318665	-4.3229	1.53991e-05	8.0936e-05
WBGene00004910	snf-11	501.654	-1.37734	0.235838	-5.84018	5.21445e-09	4.70779e-08
WBGene00007799	nrx-1	2036.22	-1.37713	0.233475	-5.89841	3.67025e-09	3.37285e-08
WBGene00219834	C26C6.13	34.755	-1.37474	0.604445	-2.27438	0.022943	0.0541137
WBGene00198497	F10G8.12	25.2485	-1.37351	0.764443	-1.79674	0.0723762	0.140701
WBGene00009881	F49C12.12	1194.6	-1.37211	0.189233	-7.25089	4.1404e-13	5.93368e-12
WBGene00008495	F01D5.5	15.2623	-1.37159	0.747092	-1.8359	0.0663727	0.131127
WBGene00018741	comt-1	14.9204	-1.37154	0.910714	-1.506	0.132067	0.229453
WBGene00000488	che-7	397.952	-1.37036	0.217967	-6.28701	3.23634e-10	3.44257e-09
WBGene00017156	F01E11.3	101.504	-1.3698	0.391137	-3.50209	0.000461628	0.00176506
WBGene00014016	ZK632.9	137.954	-1.36975	0.329602	-4.15577	3.24189e-05	0.000159658
WBGene00196878	Y55F3C.14	8.87318	-1.36835	0.995435	-1.37463	0.169247	0.279245
WBGene00010330	F59D12.2	465.178	-1.36834	0.208665	-6.55758	5.46896e-11	6.28225e-10
WBGene00202011	R13H4.13	12.4326	-1.36803	0.844115	-1.62067	0.105088	0.190967
WBGene00007228	acs-7	1311.2	-1.36793	0.238089	-5.74546	9.16688e-09	8.02687e-08
WBGene00020390	T10B5.4	592.193	-1.36743	0.253752	-5.38883	7.09198e-08	5.39095e-07
WBGene00017814	F26A10.2	10989.9	-1.36736	0.196425	-6.96125	3.37277e-12	4.4213e-11
WBGene00196960	R13F6.11	11.0347	-1.36731	0.848667	-1.61113	0.107151	0.194109
WBGene00018392	insc-1	1668.37	-1.36714	0.169879	-8.04768	8.43762e-16	1.50026e-14
WBGene00007923	C34C12.4	91.2295	-1.36698	0.411022	-3.3258	0.000881645	0.0031369
WBGene00016330	C32E12.4	1879.34	-1.36571	0.231515	-5.89901	3.65684e-09	3.36283e-08
WBGene00018696	pho-6	25.8567	-1.36301	0.694135	-1.96362	0.0495746	0.103153
WBGene00002140	inx-18	239	-1.36199	0.26626	-5.11524	3.13346e-07	2.17649e-06
WBGene00004443	rpl-29	1520.23	-1.36118	0.17982	-7.56969	3.7413e-14	5.85772e-13
WBGene00014307	F07H5.3	1972.44	-1.35946	0.288732	-4.70838	2.49694e-06	1.50458e-05
WBGene00007267	C03A3.2	606.637	-1.35438	0.269341	-5.0285	4.94342e-07	3.3299e-06
WBGene00011473	T05C12.11	19.4605	-1.35436	0.658333	-2.05726	0.0396615	0.0860759
WBGene00007689	C18E9.9	572.934	-1.35268	0.219423	-6.16471	7.06145e-10	7.18559e-09
WBGene00044774	F16B3.3	35.2255	-1.35212	0.612004	-2.20933	0.0271514	0.0623675
WBGene00003625	nhr-31	1785.38	-1.35125	0.198706	-6.80024	1.04447e-11	1.30155e-10
WBGene00019269	H41C03.2	9.74033	-1.35098	1.02417	-1.3191	0.187137	0.302126
WBGene00008132	gale-1	1931.87	-1.34993	0.199441	-6.76857	1.30064e-11	1.60285e-10
WBGene00017625	cgt-2	23.1527	-1.34989	0.803835	-1.67931	0.0930914	0.172879
WBGene00015137	B0310.1	138.547	-1.34922	0.444506	-3.03533	0.00240271	0.00768581
WBGene00003657	nhr-67	295.965	-1.34835	0.227528	-5.92606	3.10298e-09	2.87326e-08
WBGene00010327	F59C6.8	176.834	-1.34782	0.384438	-3.50596	0.000454966	0.00174158
WBGene00045398	Y71F9AM.8	9.58662	-1.34408	0.926199	-1.45118	0.146729	0.249639
WBGene00000732	col-159	34.7687	-1.34357	0.831186	-1.61645	0.105998	0.192281
WBGene00022627	ZC513.2	152.193	-1.34316	0.34995	-3.83814	0.000123967	0.000536256
WBGene00008342	frpr-5	27.249	-1.34239	0.637714	-2.10501	0.0352908	0.0780679
WBGene00015741	C13F10.1	232.93	-1.34184	0.317601	-4.22494	2.39007e-05	0.000120549
WBGene00022075	Y69A2AR.3	288.055	-1.34159	0.252529	-5.31262	1.08058e-07	8.00022e-07
WBGene00015803	C15H9.9	1818.46	-1.3399	0.194011	-6.90631	4.97411e-12	6.41977e-11
WBGene00008300	C54D10.5	64.1844	-1.33945	0.399196	-3.35538	0.00079257	0.00284878
WBGene00004401	rom-2	145.788	-1.33927	0.322941	-4.14709	3.36729e-05	0.000164907
WBGene00198446	T25D10.6	20.0135	-1.33836	0.816358	-1.63943	0.101124	0.185173
WBGene00008401	D2005.6	1487.12	-1.33767	0.224032	-5.97089	2.35967e-09	2.22819e-08
WBGene00044631	bus-18	413.377	-1.33732	0.305166	-4.38226	1.17455e-05	6.30974e-05
WBGene00004237	ptr-23	990.526	-1.33686	0.200164	-6.67883	2.40861e-11	2.8858e-10
WBGene00000789	cpz-2	665.85	-1.33651	0.209966	-6.36539	1.94798e-10	2.12972e-09
WBGene00007946	ugt-33	318.987	-1.3346	0.30658	-4.35318	1.34176e-05	7.15055e-05
WBGene00009133	bed-3	2900.01	-1.33446	0.183655	-7.26609	3.7004e-13	5.35477e-12
WBGene00020212	T04D1.2	26.2516	-1.33432	0.629305	-2.12031	0.0339802	0.0755611
WBGene00014248	ZK1307.7	53.233	-1.33385	0.468842	-2.84499	0.00444127	0.0131614
WBGene00019550	K09C4.5	29.9856	-1.3336	0.542718	-2.45726	0.0140003	0.0354407
WBGene00008914	F17C11.2	23.1635	-1.33337	0.659156	-2.02285	0.0430891	0.0921094
WBGene00219897	F16H9.6	12.5935	-1.33295	0.815867	-1.63379	0.102303	0.186922
WBGene00008900	F16H6.10	215.914	-1.33262	0.34917	-3.81652	0.000135345	0.000579669
WBGene00001551	gcy-31	64.7239	-1.33229	0.434418	-3.06683	0.00216343	0.00701438
WBGene00006690	twk-39	197.526	-1.33145	0.268855	-4.9523	7.33429e-07	4.75821e-06
WBGene00001021	dnj-3	24.9981	-1.33017	0.595827	-2.23248	0.0255836	0.0593679
WBGene00004301	ram-5	61.6278	-1.33012	0.471758	-2.81949	0.00480994	0.0141318
WBGene00018827	pst-2	301.15	-1.32929	0.274018	-4.85109	1.22783e-06	7.744e-06
WBGene00016429	C35A11.2	161.837	-1.32872	0.324854	-4.09022	4.30967e-05	0.000206318
WBGene00008610	F09C3.2	86.2142	-1.3287	0.407459	-3.26095	0.0011104	0.00385642
WBGene00174172	21ur-12437	7.26429	-1.32831	1.15434	-1.15071	0.24985	0.378212
WBGene00015000	AH9.4	32.5308	-1.32619	0.721901	-1.83708	0.0661981	0.13084
WBGene00012655	Y39A1A.17	3.95647	-1.32577	1.37272	-0.9658	0.334144	0.470845
WBGene00019486	K07D4.6	203.772	-1.32576	0.420399	-3.15358	0.00161281	0.00539255
WBGene00008341	ttr-44	63.8616	-1.325	0.474294	-2.79363	0.00521206	0.0151666
WBGene00021248	Y22D7AL.10	414.33	-1.32371	0.233959	-5.65789	1.53241e-08	1.30094e-07
WBGene00007950	C35A5.6	17.4589	-1.3218	0.895447	-1.47613	0.139909	0.240021
WBGene00015141	ugt-46	274.671	-1.32122	0.241377	-5.47368	4.40787e-08	3.46896e-07
WBGene00009789	F46F2.5	37.2709	-1.32101	0.584403	-2.26044	0.0237941	0.055816
WBGene00006774	unc-38	232.932	-1.32048	0.260173	-5.07538	3.86716e-07	2.64355e-06
WBGene00019318	K02E10.4	3398.13	-1.31996	0.231001	-5.71407	1.10304e-08	9.52764e-08
WBGene00048925	21ur-4363	20.8195	-1.31936	0.684441	-1.92764	0.0538998	0.110859
WBGene00022500	lfi-1	19123.5	-1.31898	0.216504	-6.09219	1.11378e-09	1.10314e-08
WBGene00008594	clec-57	54.4252	-1.31893	0.477688	-2.76107	0.00576131	0.0165204
WBGene00196994	T01H3.7	20.8359	-1.31791	0.798728	-1.65001	0.0989401	0.181796
WBGene00007595	C15A7.2	64.9735	-1.31651	0.408777	-3.22061	0.00127917	0.00437213
WBGene00009849	F48F7.3	39.7612	-1.31643	0.590813	-2.22816	0.0258696	0.0599204
WBGene00015968	C18C4.7	4300.65	-1.3158	0.165694	-7.94113	2.00348e-15	3.47451e-14
WBGene00018603	F48E3.2	69.6282	-1.31557	0.407307	-3.22992	0.00123827	0.00425328
WBGene00021284	Y24D9A.6	98.0008	-1.31544	0.589903	-2.22993	0.0257524	0.0597182
WBGene00017250	F08D12.7	79.5484	-1.31382	0.485687	-2.70508	0.00682884	0.0191302
WBGene00006609	tre-3	153.409	-1.31347	0.328137	-4.00283	6.25902e-05	0.000288584
WBGene00011104	cut-5	999.133	-1.31255	0.180672	-7.26483	3.73494e-13	5.39891e-12
WBGene00019464	K07B1.4	310.522	-1.31239	0.238834	-5.49499	3.90734e-08	3.10428e-07
WBGene00044169	C06C3.10	18.5147	-1.31215	0.679127	-1.93212	0.0533449	0.109904
WBGene00008599	F09A5.2	55.3646	-1.31194	0.59933	-2.18902	0.0285957	0.0651924
WBGene00021285	Y24D9A.7	36.5431	-1.30966	0.534425	-2.45059	0.0142621	0.0360216
WBGene00010907	M88.4	79.6822	-1.30892	0.367369	-3.56296	0.000366701	0.00143703
WBGene00018074	F35H12.1	69.5901	-1.30852	0.388471	-3.36837	0.00075613	0.00273249
WBGene00015691	viln-1	2634.22	-1.30709	0.157298	-8.30966	9.59788e-17	1.81775e-15
WBGene00020267	T05H4.4	12.9973	-1.30472	0.885532	-1.47337	0.140651	0.241015
WBGene00021675	Y48G1BR.1	1053.22	-1.30465	0.180586	-7.22451	5.02924e-13	7.15382e-12
WBGene00001330	eps-8	14416.1	-1.30381	0.198076	-6.58238	4.62961e-11	5.37823e-10
WBGene00018738	swip-10	294.879	-1.30363	0.23764	-5.48575	4.1171e-08	3.25821e-07
WBGene00000193	arl-6	21.3095	-1.3019	0.869237	-1.49775	0.134198	0.232341
WBGene00046712	21ur-1004	10.8877	-1.30187	1.09688	-1.18688	0.235274	0.361205
WBGene00016292	tbc-7	2032.23	-1.30154	0.182023	-7.15043	8.65096e-13	1.20116e-11
WBGene00022504	mam-1	880.668	-1.30143	0.197805	-6.57935	4.72517e-11	5.4844e-10
WBGene00013406	Y63D3A.7	621.881	-1.30043	0.205473	-6.32896	2.46824e-10	2.66797e-09
WBGene00022743	mlt-7	555.919	-1.29862	0.235687	-5.50996	3.58924e-08	2.8693e-07
WBGene00008776	F13H10.5	1840.12	-1.29545	0.198321	-6.53209	6.48597e-11	7.39335e-10
WBGene00044455	F23F12.13	33.0483	-1.29332	0.622881	-2.07635	0.0378613	0.0828279
WBGene00197636	Y67D8C.16	14.9687	-1.29225	0.862133	-1.49889	0.133901	0.231886
WBGene00018468	cla-1	31503.7	-1.29173	0.178082	-7.25354	4.06007e-13	5.85623e-12
WBGene00018035	sek-4	53.8004	-1.29158	0.434902	-2.96983	0.00297967	0.00930215
WBGene00020727	npr-21	77.0414	-1.29088	0.388009	-3.32692	0.000878121	0.00312603
WBGene00007460	C08F11.13	72.0423	-1.29054	0.604771	-2.13393	0.0328487	0.0733991
WBGene00017663	F21D12.3	496.399	-1.2904	0.210718	-6.12384	9.13458e-10	9.16956e-09
WBGene00012777	lact-8	659.951	-1.29037	0.239268	-5.39298	6.92993e-08	5.27978e-07
WBGene00008923	F17C11.12	179.149	-1.28847	0.276113	-4.66647	3.0642e-06	1.8153e-05
WBGene00015062	trx-1	28.1472	-1.28794	0.612845	-2.10158	0.0355901	0.0786442
WBGene00001911	his-37	225.663	-1.28792	0.310835	-4.14343	3.4215e-05	0.000167211
WBGene00008228	C50B8.6	377.376	-1.28776	0.21899	-5.88043	4.09204e-09	3.73989e-08
WBGene00009515	clec-170	38.4567	-1.28769	0.559752	-2.30046	0.0214223	0.051113
WBGene00016528	C39B5.10	12.1085	-1.28767	0.94432	-1.36359	0.172697	0.283642
WBGene00006591	toh-1	134.645	-1.28663	0.34497	-3.72969	0.000191717	0.00079883
WBGene00015712	sre-11	9.16113	-1.28627	1.02011	-1.26091	0.207342	0.327664
WBGene00198053	T05A6.12	7.6884	-1.28611	1.11043	-1.15821	0.246779	0.374623
WBGene00004017	phg-1	850.891	-1.28588	0.202868	-6.33852	2.31989e-10	2.51372e-09
WBGene00044615	B0252.8	7.34457	-1.28568	1.16884	-1.09995	0.271352	0.403229
WBGene00168282	21ur-5975	5.78281	-1.28477	1.2556	-1.02324	0.306195	0.441493
WBGene00012854	Y44A6D.3	349.791	-1.28465	0.344191	-3.73236	0.000189695	0.000790899
WBGene00003497	mup-4	12608.8	-1.28435	0.145142	-8.84887	8.84105e-19	1.92217e-17
WBGene00004859	sma-5	1143.29	-1.28327	0.180476	-7.1105	1.15622e-12	1.58563e-11
WBGene00009356	F33A8.10	45.2322	-1.28326	0.466514	-2.75074	0.00594601	0.0169627
WBGene00019497	K07E8.6	92.6212	-1.28272	0.44884	-2.85785	0.00426522	0.0127129
WBGene00001786	gst-38	13.5269	-1.28215	0.803956	-1.5948	0.110756	0.199088
WBGene00001805	gur-4	10.6125	-1.28213	1.01315	-1.26549	0.205697	0.325668
WBGene00015369	ugt-51	141.321	-1.28207	0.338136	-3.7916	0.000149683	0.000637536
WBGene00044383	T05A7.11	496.622	-1.2807	0.234942	-5.45113	5.00507e-08	3.91132e-07
WBGene00020314	T07E3.3	78.9011	-1.2799	0.472507	-2.70874	0.00675384	0.0189439
WBGene00010884	M7.8	69.7672	-1.27933	0.457505	-2.79632	0.00516886	0.0150573
WBGene00001819	haf-9	870.653	-1.27923	0.216312	-5.91383	3.34239e-09	3.08854e-08
WBGene00008687	F11A10.6	468.674	-1.2791	0.250229	-5.11171	3.19259e-07	2.21526e-06
WBGene00011437	smoc-1	69.7468	-1.27888	0.456128	-2.80378	0.00505076	0.0147486
WBGene00020889	T28C12.2	8.74822	-1.2765	1.10714	-1.15297	0.248921	0.377147
WBGene00008355	fbxa-141	36.5712	-1.27645	0.567827	-2.24796	0.024579	0.0573452
WBGene00008987	F20G2.3	399.374	-1.2763	0.239654	-5.32561	1.00612e-07	7.47798e-07
WBGene00001690	grd-1	779.702	-1.27492	0.210961	-6.0434	1.50896e-09	1.4663e-08
WBGene00018582	F48A9.2	136.142	-1.2748	0.313419	-4.06739	4.75421e-05	0.00022558
WBGene00011181	R09H10.3	365.436	-1.2744	0.260513	-4.89186	9.9886e-07	6.36595e-06
WBGene00007115	B0198.2	36.7227	-1.27423	0.648186	-1.96584	0.0493173	0.102714
WBGene00004265	qui-1	593.992	-1.27362	0.214412	-5.94003	2.84962e-09	2.65891e-08
WBGene00012531	Y32F6B.1	411.379	-1.27142	0.294556	-4.3164	1.58593e-05	8.30489e-05
WBGene00198652	F25H8.12	15.3683	-1.27098	0.782833	-1.62356	0.104469	0.190101
WBGene00198026	Y71F9B.19	28.54	-1.27057	0.614525	-2.06757	0.0386807	0.0843349
WBGene00020413	T10E9.3	198.504	-1.27006	0.332661	-3.81788	0.000134603	0.000576851
WBGene00004454	rpl-36.A	4088.86	-1.26994	0.202112	-6.28333	3.31399e-10	3.50564e-09
WBGene00010521	K03A11.4	18.0802	-1.26993	0.829567	-1.53084	0.125809	0.22076
WBGene00007487	C09G1.5	67.7197	-1.26908	0.598517	-2.12037	0.0339748	0.0755611
WBGene00020973	W03B1.3	458.776	-1.26906	0.214791	-5.90833	3.45592e-09	3.18903e-08
WBGene00017973	ift-81	275.854	-1.26859	0.284031	-4.46636	7.95619e-06	4.40688e-05
WBGene00049160	21ur-995	14.8838	-1.26852	0.861044	-1.47323	0.140688	0.241048
WBGene00016555	math-20	56.5445	-1.26847	0.532415	-2.38248	0.0171962	0.0423524
WBGene00006749	unc-9	1046.88	-1.268	0.248527	-5.10206	3.35973e-07	2.32521e-06
WBGene00021111	W09C3.3	12.3676	-1.26771	0.918005	-1.38094	0.167298	0.27661
WBGene00045053	K12C11.7	33.9659	-1.2675	0.617773	-2.05173	0.040196	0.0869256
WBGene00043302	F32D8.11	17.7376	-1.2675	0.702652	-1.80388	0.0712505	0.138981
WBGene00007154	dhc-3	95.613	-1.26723	0.433958	-2.92015	0.00349858	0.0107145
WBGene00000058	acr-19	110.062	-1.26718	0.321871	-3.93693	8.25323e-05	0.000371063
WBGene00007001	tufm-2	357.023	-1.26693	0.255513	-4.95835	7.10931e-07	4.62363e-06
WBGene00000005	aat-4	27.7637	-1.26651	0.677426	-1.8696	0.06154	0.123292
WBGene00004441	rpl-27	4117.96	-1.26568	0.179613	-7.04668	1.83233e-12	2.47226e-11
WBGene00000606	col-17	25.9784	-1.26524	0.828603	-1.52696	0.126772	0.222071
WBGene00014848	VM106R.1	202.45	-1.26488	0.38574	-3.27911	0.00104134	0.0036364
WBGene00001075	dpy-14	65746	-1.26484	0.188624	-6.70561	2.00572e-11	2.42482e-10
WBGene00015476	C05D9.9	11.0753	-1.26354	0.892431	-1.41584	0.156821	0.262896
WBGene00001915	his-41	689.551	-1.26302	0.212358	-5.94762	2.72071e-09	2.55289e-08
WBGene00196159	K04B12.6	27.6991	-1.26192	0.730595	-1.72725	0.0841229	0.158983
WBGene00003755	nlp-17	35.197	-1.2604	0.687087	-1.83442	0.0665922	0.131464
WBGene00219934	F35F11.4	11.0323	-1.26027	1.05276	-1.19711	0.231263	0.356863
WBGene00019514	K08B4.2	66.1428	-1.25999	0.416021	-3.02867	0.00245634	0.00783113
WBGene00020811	T25G12.3	27.8054	-1.25976	0.640484	-1.96689	0.0491955	0.102492
WBGene00016746	C48B6.10	3077.22	-1.25948	0.213859	-5.88934	3.87751e-09	3.54868e-08
WBGene00012304	cutl-4	43.7904	-1.25944	0.590361	-2.13334	0.0328972	0.0734828
WBGene00008167	acox-1.5	296.728	-1.25939	0.268397	-4.69225	2.70218e-06	1.61804e-05
WBGene00006775	unc-39	159.232	-1.25929	0.271115	-4.64487	3.40291e-06	2.00707e-05
WBGene00044260	Y87G2A.19	248.015	-1.25903	0.32561	-3.86668	0.000110328	0.000482878
WBGene00018342	F42A10.6	82.4984	-1.259	0.382821	-3.28875	0.00100634	0.00352984
WBGene00017713	F22E5.20	46.56	-1.25884	0.454897	-2.76729	0.00565236	0.0162698
WBGene00021136	W10G11.3	17.6763	-1.25808	0.749478	-1.67861	0.0932283	0.173061
WBGene00018602	F48D6.4	698.316	-1.25788	0.20597	-6.10708	1.01472e-09	1.01328e-08
WBGene00219813	C14A11.13	8.77444	-1.25753	0.95828	-1.31227	0.189428	0.305088
WBGene00010111	F55D12.2	1361.76	-1.25732	0.188975	-6.65338	2.86429e-11	3.41341e-10
WBGene00017781	F25E2.3	156.851	-1.25693	0.41333	-3.04098	0.00235813	0.00756129
WBGene00019022	F58A6.1	160.369	-1.25637	0.31014	-4.05098	5.10025e-05	0.000240754
WBGene00013856	ZC168.2	104.345	-1.25573	0.577593	-2.17408	0.029699	0.0673059
WBGene00018958	cest-27	265.581	-1.25499	0.267292	-4.69522	2.66319e-06	1.59755e-05
WBGene00016911	drn-1	11.1078	-1.25485	1.0612	-1.18248	0.237014	0.363305
WBGene00015930	cest-4	99.6184	-1.25445	0.329737	-3.80441	0.000142143	0.000607606
WBGene00000089	aex-6	134.883	-1.25332	0.302838	-4.1386	3.49427e-05	0.000170394
WBGene00010703	K09A9.6	1126.02	-1.25229	0.23037	-5.43599	5.44929e-08	4.22391e-07
WBGene00009099	F25B3.2	18.311	-1.25049	0.706846	-1.76911	0.0768757	0.147619
WBGene00016091	nhr-30	15.1184	-1.25036	0.783411	-1.59604	0.110479	0.198737
WBGene00016534	C39D10.7	496.213	-1.24963	1.04817	-1.19221	0.233179	0.358796
WBGene00000397	cdh-5	4662.36	-1.24873	0.167498	-7.45522	8.97182e-14	1.35857e-12
WBGene00021952	vha-19	2351.6	-1.24867	0.198719	-6.28362	3.30787e-10	3.50194e-09
WBGene00196442	T21B10.9	17.1769	-1.2486	0.727919	-1.7153	0.086291	0.162324
WBGene00012016	inpp-1	245.875	-1.24851	0.260094	-4.80025	1.58467e-06	9.80049e-06
WBGene00008258	mans-2	346.21	-1.24843	0.266688	-4.68126	2.85122e-06	1.69891e-05
WBGene00021981	lgc-26	216.461	-1.24798	0.248867	-5.01464	5.31318e-07	3.55924e-06
WBGene00045388	lfor-1	107.046	-1.24763	0.510478	-2.44405	0.0145235	0.0365783
WBGene00016983	C56G2.15	389.596	-1.24677	0.281421	-4.43025	9.41246e-06	5.14741e-05
WBGene00050118	21ur-1623	6.51757	-1.24655	1.19925	-1.03944	0.2986	0.434023
WBGene00219695	linc-126	20.3291	-1.24394	0.776562	-1.60186	0.109188	0.196811
WBGene00000037	ace-3	1891.62	-1.24303	0.202755	-6.13072	8.74839e-10	8.81497e-09
WBGene00000085	aex-2	36.6034	-1.24209	0.66139	-1.878	0.0603817	0.121591
WBGene00020658	argn-1	276.88	-1.24207	0.354353	-3.50518	0.000456297	0.00174568
WBGene00019612	gpcp-1	168.609	-1.24123	0.312734	-3.96896	7.21875e-05	0.000328529
WBGene00198496	ZC504.12	7.04461	-1.2409	1.14476	-1.08398	0.278375	0.411197
WBGene00003071	lrp-1	26402.1	-1.24068	0.197064	-6.2958	3.05814e-10	3.26339e-09
WBGene00003518	nac-2	220.802	-1.23984	0.263372	-4.70757	2.50693e-06	1.50924e-05
WBGene00009294	F31D4.9	325.617	-1.23969	0.249685	-4.965	6.87001e-07	4.48174e-06
WBGene00004014	phb-1	970.217	-1.23956	0.188816	-6.56489	5.207e-11	5.99163e-10
WBGene00201009	W03G11.20	9.48858	-1.23882	0.980335	-1.26367	0.206349	0.326359
WBGene00011535	T06E4.8	28.0697	-1.23794	0.643262	-1.92447	0.0542953	0.111569
WBGene00010350	H01G02.3	196.103	-1.23769	0.261057	-4.74106	2.126e-06	1.29212e-05
WBGene00011768	oac-46	4232.09	-1.23741	0.191461	-6.463	1.02645e-10	1.14755e-09
WBGene00199840	K10C3.12	10.5158	-1.23722	1.06657	-1.16	0.246047	0.37381
WBGene00012361	mrpl-12	242.401	-1.23602	0.333251	-3.70897	0.000208106	0.000859088
WBGene00007669	C18D1.2	11.2687	-1.23599	1.015	-1.21772	0.223331	0.347754
WBGene00009903	F49E12.10	107.821	-1.23531	0.32541	-3.79617	0.000146948	0.000626742
WBGene00018217	F40A3.2	1697.29	-1.23509	0.168893	-7.31286	2.61518e-13	3.8426e-12
WBGene00011391	mrps-12	203.392	-1.23434	0.273577	-4.51184	6.42666e-06	3.62425e-05
WBGene00019905	R05G9.3	34.0448	-1.2343	0.65887	-1.87335	0.0610197	0.12247
WBGene00001803	lite-1	4.21221	-1.23416	1.36668	-0.903036	0.366507	0.504536
WBGene00022810	ZK721.3	65.3895	-1.23291	0.496468	-2.48336	0.0130151	0.0332743
WBGene00015554	C06G3.8	87.0762	-1.23227	0.414486	-2.97301	0.00294893	0.00922497
WBGene00012063	fbxb-1	12.9795	-1.23046	0.90771	-1.35557	0.175236	0.287107
WBGene00006407	lim-9	5943.18	-1.2304	0.20697	-5.94481	2.76773e-09	2.58973e-08
WBGene00019108	chpf-2	199.7	-1.23019	0.307778	-3.99701	6.41479e-05	0.000295054
WBGene00021254	Y22D7AL.16	29.4018	-1.22961	0.659211	-1.86528	0.0621426	0.124257
WBGene00001109	dsl-7	68.1322	-1.22783	0.417062	-2.94399	0.00324013	0.0100032
WBGene00001987	hot-2	207.867	-1.22745	0.289272	-4.24326	2.20296e-05	0.00011217
WBGene00011670	fbxa-84	20.0719	-1.22683	0.818771	-1.49838	0.134034	0.232086
WBGene00001116	dyc-1	2421	-1.2268	0.227571	-5.39084	7.01299e-08	5.33698e-07
WBGene00021059	atat-2	218.342	-1.22493	0.357828	-3.42324	0.000618787	0.00228811
WBGene00049675	21ur-4889	12.0215	-1.2243	0.864307	-1.41651	0.156626	0.262668
WBGene00007607	C15C8.5	19.3482	-1.22358	0.736131	-1.66218	0.0964771	0.178127
WBGene00255606	T23B3.9	8.50758	-1.22328	1.06958	-1.1437	0.252748	0.381532
WBGene00018514	twnk-1	139.093	-1.22324	0.354366	-3.45192	0.000556619	0.00208709
WBGene00003995	pgp-1	568.571	-1.22279	0.196935	-6.20908	5.32971e-10	5.49449e-09
WBGene00044045	R11G10.3	21.2573	-1.22169	0.727896	-1.67839	0.0932711	0.173116
WBGene00000768	cor-1	2053.95	-1.22161	0.164405	-7.43049	1.08199e-13	1.62919e-12
WBGene00021600	Y46H3A.4	6.76158	-1.22151	1.12394	-1.08681	0.277121	0.409797
WBGene00009165	gpx-1	132.949	-1.22132	0.330354	-3.697	0.000218162	0.000895897
WBGene00009397	clec-66	363.773	-1.22014	0.316561	-3.85434	0.000116041	0.00050573
WBGene00008707	F11E6.3	226.059	-1.21975	0.25696	-4.74684	2.06618e-06	1.2592e-05
WBGene00001749	gst-1	1738.95	-1.21941	0.220234	-5.53689	3.07893e-08	2.48902e-07
WBGene00003033	lin-48	89.8188	-1.21877	0.491381	-2.48029	0.0131274	0.0335358
WBGene00219372	not found	160.599	-1.2179	0.316949	-3.84257	0.000121752	0.000528211
WBGene00018822	F54D12.9	35.5153	-1.21724	0.527371	-2.30812	0.0209923	0.0503386
WBGene00045095	mrpr-1	41.1698	-1.21722	0.760332	-1.60091	0.109397	0.197082
WBGene00013170	Y53F4B.24	16.7079	-1.21712	0.80747	-1.50733	0.131727	0.228981
WBGene00012937	Y47D3A.31	12.1646	-1.21698	0.853818	-1.42534	0.154059	0.259013
WBGene00202076	K04A8.17	29.4852	-1.21586	0.654838	-1.85673	0.063349	0.126198
WBGene00022331	fbxa-19	13.9785	-1.21406	0.8428	-1.44051	0.149722	0.253442
WBGene00020967	W03A5.2	30.7125	-1.21395	0.545499	-2.22539	0.0260554	0.0602119
WBGene00016806	C50D2.2	223.184	-1.21373	0.255064	-4.75852	1.95018e-06	1.19449e-05
WBGene00002052	ifa-4	866.017	-1.21363	0.217091	-5.59043	2.26507e-08	1.87067e-07
WBGene00007717	C25D7.5	41.6769	-1.21358	0.517147	-2.34669	0.0189409	0.0460933
WBGene00015354	snet-1	84.9445	-1.21342	0.452245	-2.6831	0.00729427	0.0202348
WBGene00011893	T21C9.6	126.565	-1.21326	0.354577	-3.42171	0.00062229	0.00229852
WBGene00001682	gpc-2	1614.76	-1.21326	0.201707	-6.01494	1.79952e-09	1.73199e-08
WBGene00016664	C45E5.1	27.3237	-1.21319	0.554755	-2.1869	0.0287501	0.0655109
WBGene00016745	C48B6.9	185.043	-1.21248	0.354342	-3.42177	0.000622143	0.00229852
WBGene00013135	rga-2	5626.88	-1.2121	0.181351	-6.68373	2.32936e-11	2.79838e-10
WBGene00019373	K04A8.1	347.086	-1.21161	0.272185	-4.4514	8.53106e-06	4.69419e-05
WBGene00003519	nac-3	657.658	-1.21154	0.252921	-4.79021	1.66608e-06	1.0266e-05
WBGene00016052	dod-3	29.6825	-1.21154	0.607912	-1.99296	0.0462663	0.0975597
WBGene00001479	fmo-4	577.885	-1.20981	0.229356	-5.2748	1.32898e-07	9.74223e-07
WBGene00007725	C25F9.5	75.2039	-1.20971	0.389318	-3.10725	0.00188837	0.00622214
WBGene00001188	egl-20	142.813	-1.209	0.343402	-3.52065	0.000430487	0.00165642
WBGene00016884	C52E2.5	34.417	-1.20894	0.680095	-1.77761	0.0754676	0.145358
WBGene00003214	mel-32	3020.88	-1.20894	0.16114	-7.50243	6.26456e-14	9.62798e-13
WBGene00020143	T01C8.2	42.8961	-1.20835	0.594613	-2.03216	0.0421376	0.0904224
WBGene00010573	K04H4.2	31279.5	-1.20808	0.203207	-5.94509	2.76302e-09	2.58876e-08
WBGene00201806	W01A11.18	64.2643	-1.20743	0.502712	-2.40182	0.0163136	0.0404093
WBGene00007704	mdt-21	32.3368	-1.20681	0.559575	-2.15666	0.0310324	0.0698703
WBGene00269373	M01D1.12	121.482	-1.2068	0.303151	-3.98084	6.86712e-05	0.000313808
WBGene00001723	grl-14	71.4728	-1.20657	0.459764	-2.62433	0.0086819	0.0236138
WBGene00013402	Y62H9A.14	8.4767	-1.20608	1.0317	-1.16901	0.242398	0.369646
WBGene00010742	K10D6.2	2586.54	-1.20596	0.197258	-6.11363	9.73929e-10	9.76192e-09
WBGene00019655	K11G9.5	22.8351	-1.20588	0.817062	-1.47588	0.139976	0.240106
WBGene00022173	set-27	873.414	-1.20558	0.201134	-5.99394	2.04817e-09	1.95057e-08
WBGene00015619	C08G9.1	360.909	-1.20545	0.243949	-4.9414	7.75631e-07	5.01498e-06
WBGene00004483	rps-14	21910	-1.20494	0.29881	-4.03245	5.5198e-05	0.000258331
WBGene00001135	eat-4	38.4136	-1.20435	0.578304	-2.08255	0.0372919	0.0817394
WBGene00009347	F32H5.1	10.5062	-1.20387	0.979877	-1.22859	0.219226	0.342439
WBGene00021416	mksr-2	261.167	-1.20371	0.258298	-4.66018	3.15927e-06	1.86914e-05
WBGene00014669	zipt-2.1	430.912	-1.20331	0.236949	-5.07835	3.80728e-07	2.60661e-06
WBGene00000610	col-33	53.4494	-1.20257	0.539271	-2.22999	0.0257482	0.0597182
WBGene00195987	C04C11.7	11.2187	-1.20241	0.909958	-1.32139	0.186371	0.301289
WBGene00044504	R13A1.10	15.1031	-1.20191	0.844073	-1.42394	0.154464	0.259529
WBGene00012953	fbxa-216	36.3798	-1.19972	0.650417	-1.84454	0.0651051	0.129015
WBGene00008874	F15H10.7	22.4171	-1.19897	0.640039	-1.87328	0.0610293	0.122471
WBGene00169029	21ur-14269	16.3942	-1.19782	0.881709	-1.35852	0.174298	0.285816
WBGene00015720	C13A2.3	11.3554	-1.19773	0.906332	-1.32152	0.186328	0.301289
WBGene00010879	taap-1	304.178	-1.19685	0.296947	-4.0305	5.56572e-05	0.000260227
WBGene00016394	C34B2.9	68.7485	-1.19615	0.408602	-2.92743	0.00341778	0.0104959
WBGene00000679	col-105	53.0812	-1.19615	0.47628	-2.51144	0.0120241	0.0310855
WBGene00013865	ZC334.7	56.7641	-1.19601	0.49693	-2.4068	0.016093	0.0399369
WBGene00008548	F07A11.5	55.2987	-1.19559	0.470722	-2.53991	0.011088	0.0290475
WBGene00017015	D1014.2	62.8275	-1.19509	0.46182	-2.58778	0.00965975	0.0258321
WBGene00011522	srap-1	1947.49	-1.19422	0.26009	-4.59157	4.39928e-06	2.55085e-05
WBGene00022771	ZK616.1	37.8022	-1.19344	0.493502	-2.4183	0.0155931	0.038884
WBGene00044553	T23B12.11	94.4167	-1.19313	0.408503	-2.92074	0.00349198	0.0106992
WBGene00006809	unc-77	305.389	-1.19265	0.252059	-4.73162	2.22733e-06	1.35187e-05
WBGene00016041	not found	15.0199	-1.19194	0.799428	-1.49099	0.135964	0.234668
WBGene00020502	T14B4.8	533.549	-1.19181	0.236085	-5.04824	4.4591e-07	3.02499e-06
WBGene00001959	hlh-15	52.8543	-1.19068	0.443732	-2.68333	0.00728932	0.0202252
WBGene00009512	bigr-1	24.0102	-1.19036	0.63031	-1.88853	0.0589554	0.119276
WBGene00020238	T05B4.4	7.77431	-1.19019	0.990686	-1.20138	0.229603	0.354916
WBGene00020599	T20B6.3	41.4898	-1.19001	0.494936	-2.40437	0.0162003	0.0401732
WBGene00003552	nas-36	70.6647	-1.18956	0.535388	-2.22188	0.0262917	0.0606847
WBGene00013746	lgc-55	157.811	-1.1895	0.367083	-3.2404	0.00119362	0.00410808
WBGene00017900	F28E10.1	3441.67	-1.18918	0.203349	-5.84798	4.97571e-09	4.50747e-08
WBGene00021185	Y9C12A.1	24.2141	-1.18906	0.733352	-1.62141	0.104931	0.190732
WBGene00022505	ZC21.3	449.025	-1.1885	0.364819	-3.25778	0.00112288	0.00389267
WBGene00019302	K02D10.2	8.84049	-1.1881	1.0151	-1.17042	0.24183	0.368954
WBGene00017923	F29B9.8	1195.38	-1.18776	0.225325	-5.27134	1.35434e-07	9.91722e-07
WBGene00003729	nhx-1	66.4974	-1.18695	0.546414	-2.17225	0.0298365	0.0675374
WBGene00011041	R05H5.7	158.569	-1.1867	0.334779	-3.54471	0.000393041	0.00153262
WBGene00010345	F59F5.7	1706.06	-1.18608	0.209844	-5.65218	1.58429e-08	1.33988e-07
WBGene00000631	col-54	139.484	-1.18531	0.350215	-3.38453	0.000712998	0.00259274
WBGene00021032	clec-118	8.70149	-1.1851	1.07635	-1.10104	0.27088	0.402812
WBGene00003590	nex-3	281.593	-1.18504	0.240881	-4.91961	8.67161e-07	5.57175e-06
WBGene00219720	linc-2	10.3832	-1.18325	0.871457	-1.35778	0.174533	0.286165
WBGene00010966	nduo-3	69.951	-1.18319	0.489445	-2.41742	0.0156311	0.0389642
WBGene00010937	M163.5	51.0696	-1.18244	0.468821	-2.52217	0.0116634	0.0303169
WBGene00016354	rig-6	4123.83	-1.18167	0.158085	-7.47491	7.72585e-14	1.17791e-12
WBGene00013855	cubn-1	1558.74	-1.18151	0.194356	-6.07912	1.20841e-09	1.18767e-08
WBGene00010925	mfsd-11	93.5274	-1.18151	0.411217	-2.8732	0.00406335	0.012223
WBGene00006721	ubh-1	241.681	-1.18139	0.240203	-4.91829	8.73057e-07	5.60694e-06
WBGene00004115	pqn-26	3051.46	-1.18105	0.252359	-4.68002	2.86845e-06	1.70614e-05
WBGene00016371	C33H5.2	47.2559	-1.18027	0.542248	-2.17663	0.0295083	0.0669532
WBGene00045412	C25F9.12	16.3505	-1.17958	0.959732	-1.22907	0.219047	0.342238
WBGene00001108	dsl-6	439.39	-1.17923	0.268893	-4.38552	1.15711e-05	6.22856e-05
WBGene00000501	cho-1	67.1571	-1.17897	0.420019	-2.80695	0.00500134	0.0146202
WBGene00020992	W03F8.2	53.7706	-1.17849	0.584829	-2.01511	0.0438934	0.093485
WBGene00219713	linc-27	49.6544	-1.17815	0.587831	-2.00424	0.0450447	0.0954355
WBGene00016921	C54F6.3	15.5398	-1.17752	0.742578	-1.58572	0.112802	0.20202
WBGene00015964	glb-5	21.6177	-1.17729	0.654161	-1.7997	0.0719077	0.140076
WBGene00006787	unc-52	60976.7	-1.17727	0.232755	-5.05799	4.23701e-07	2.87872e-06
WBGene00020656	T21E12.5	16.7174	-1.17678	0.840419	-1.40023	0.161446	0.269197
WBGene00010948	M195.2	1077.19	-1.17635	0.288146	-4.0825	4.45546e-05	0.000212612
WBGene00012544	Y37D8A.2	329.614	-1.17519	0.231757	-5.07078	3.96179e-07	2.70547e-06
WBGene00168411	21ur-14134	9.96927	-1.17476	0.888108	-1.32277	0.185913	0.300896
WBGene00003600	nhr-1	1851.81	-1.17392	0.22396	-5.24166	1.5914e-07	1.15331e-06
[truncated: 11,371 more rows]

## Sheet: lin-53ivsWT
WormBase ID	Public Name	baseMean	log2FoldChange	lfcSE	stat	pvalue	padj
WBGene00000650	col-74	9256.44	-10.3002	0.336862	-30.5769	2.48095e-205	4.45437e-202
WBGene00009041	cut-3	8165.32	-9.7524	0.28213	-34.5671	7.89999e-262	3.30957e-258
WBGene00015339	C02E7.6	1382	-8.42571	0.360205	-23.3914	5.2228e-121	1.52652e-118
WBGene00006947	wrt-1	8767.57	-7.97987	0.223547	-35.6967	4.45319e-279	2.79839e-275
WBGene00000738	col-165	11276.2	-7.75305	0.275168	-28.1757	1.16025e-174	9.72138e-172
WBGene00018297	F41F3.3	13039.4	-7.64475	0.934937	-8.17675	2.91597e-16	3.54429e-15
WBGene00020040	R12E2.15	4342.05	-7.5452	1.34052	-5.62858	1.81697e-08	1.0432e-07
WBGene00017560	F18C5.5	1543.13	-7.30096	0.296557	-24.6191	7.89059e-134	3.09903e-131
WBGene00001716	grl-7	3278.25	-7.29932	0.245761	-29.7009	7.46554e-194	1.04252e-190
WBGene00003888	osm-8	1245.55	-7.28694	0.906666	-8.03707	9.20146e-16	1.07978e-14
WBGene00001724	grl-15	2384.8	-7.22371	0.281006	-25.7066	9.86798e-146	4.77003e-143
WBGene00009983	cut-2	13332.2	-7.21772	0.496284	-14.5435	6.41972e-48	3.78794e-46
WBGene00007229	C01G6.9	739.861	-7.11341	0.338564	-21.0106	5.25112e-98	1.15782e-95
WBGene00006950	wrt-4	774.705	-7.08545	0.342494	-20.6878	4.45956e-95	9.18815e-93
WBGene00004120	pqn-32	6082.79	-7.04791	0.239076	-29.4798	5.22924e-191	5.97465e-188
WBGene00006948	wrt-2	6238.82	-6.93924	0.220378	-31.4878	1.2744e-217	4.00415e-214
WBGene00012540	Y37A1B.7	1728.14	-6.89247	0.240875	-28.6143	4.4594e-180	4.00327e-177
WBGene00017998	F33D4.6	4283.74	-6.82516	0.263451	-25.9068	5.58797e-148	3.19225e-145
WBGene00017483	lgc-22	3971.13	-6.79733	0.559612	-12.1465	5.98667e-34	2.07274e-32
WBGene00022517	ZC123.1	4132.18	-6.76285	0.217198	-31.1368	7.65709e-213	1.92469e-209
WBGene00010835	M03B6.3	3610.27	-6.729	0.258408	-26.0402	1.73504e-149	1.03838e-146
WBGene00008215	C49F8.3	535.197	-6.67575	0.342083	-19.515	8.18512e-85	1.35356e-82
WBGene00001714	grl-5	2399.13	-6.67202	0.243307	-27.4222	1.48952e-165	1.17002e-162
WBGene00020149	T01D1.4	1201.78	-6.64812	0.712084	-9.33615	9.98992e-21	1.65856e-19
WBGene00012433	Y11D7A.9	418.278	-6.59584	0.376778	-17.5059	1.29176e-68	1.41173e-66
WBGene00018969	F56D3.1	3380.97	-6.48531	0.210686	-30.7819	4.5753e-208	9.58373e-205
WBGene00010461	K01D12.1	426.186	-6.48502	0.371154	-17.4726	2.31783e-68	2.51125e-66
WBGene00016700	C46A5.4	2032.55	-6.48459	0.219803	-29.5018	2.72599e-191	3.42602e-188
WBGene00018737	F53B1.4	4868.42	-6.47553	0.217909	-29.7166	4.68177e-194	7.35506e-191
WBGene00007867	C32H11.4	366.442	-6.46963	0.399122	-16.2097	4.30995e-59	3.6354e-57
WBGene00021389	Y38A10A.2	799.752	-6.40331	0.290904	-22.0118	2.2215e-107	5.69793e-105
WBGene00022665	ZK154.1	736.08	-6.36284	0.305285	-20.8423	1.7918e-96	3.88265e-94
WBGene00017716	sups-1	2403.42	-6.34105	0.296665	-21.3745	2.30851e-101	5.47421e-99
WBGene00017018	D1014.5	1138.03	-6.34015	0.716672	-8.84666	9.01774e-19	1.31175e-17
WBGene00022679	ZK180.5	6221.36	-6.33418	1.02947	-6.15283	7.61124e-10	5.18472e-09
WBGene00017723	bgnt-1.2	281.176	-6.26348	0.407298	-15.3781	2.29426e-53	1.64767e-51
WBGene00000653	col-77	833.815	-6.25857	0.629489	-9.94229	2.72485e-23	5.35929e-22
WBGene00000691	col-117	361.575	-6.12651	0.844454	-7.25499	4.01686e-13	3.74788e-12
WBGene00044463	W09G12.10	548.437	-6.07645	0.355769	-17.0797	2.10054e-65	2.11197e-63
WBGene00019154	glf-1	3134.07	-6.0362	0.235793	-25.5996	1.5399e-144	7.16796e-142
WBGene00017307	F09F9.2	525.829	-6.03062	0.36162	-16.6767	1.93697e-62	1.77692e-60
WBGene00017969	ctsa-3.1	520.093	-6.01629	0.345965	-17.3899	9.84615e-68	1.0487e-65
WBGene00007425	C08B6.4	1583.93	-5.94825	0.236685	-25.1314	2.25526e-139	9.77385e-137
WBGene00011757	cht-2	255.772	-5.89795	0.422453	-13.9612	2.68876e-44	1.41391e-42
WBGene00000853	cut-6	2201.54	-5.87975	0.578229	-10.1686	2.73946e-24	5.77677e-23
WBGene00013173	Y53F4B.27	710.232	-5.87697	0.295024	-19.9203	2.71432e-88	4.80472e-86
WBGene00011107	R07E3.6	4300.1	-5.87205	0.223094	-26.321	1.10206e-152	7.69486e-150
WBGene00009830	cutl-18	539.309	-5.8644	0.795184	-7.3749	1.64468e-13	1.58151e-12
WBGene00007600	C15C6.1	424.015	-5.81323	0.845235	-6.87765	6.08465e-12	5.1186e-11
WBGene00004998	spp-13	513.152	-5.80635	0.322348	-18.0127	1.5494e-72	1.98703e-70
WBGene00010267	lips-9	188.202	-5.78057	0.469107	-12.3225	6.85449e-35	2.48263e-33
WBGene00008605	mlt-9	2489.18	-5.77267	0.230334	-25.0621	1.28709e-138	5.39205e-136
WBGene00194915	JC8.16	270.689	-5.76484	0.381482	-15.1117	1.35671e-51	9.36872e-50
WBGene00044024	C35A5.11	1602.34	-5.74539	0.219505	-26.1743	5.21462e-151	3.44934e-148
WBGene00012032	T26C5.2	1264.85	-5.72825	0.84358	-6.79041	1.11819e-11	9.2093e-11
WBGene00015841	skpo-2	2004.11	-5.68104	0.232564	-24.4279	8.64652e-132	3.29301e-129
WBGene00009904	F49E12.12	120.429	-5.67159	0.536614	-10.5692	4.13921e-26	9.76015e-25
WBGene00000678	col-104	1413.47	-5.64354	0.281772	-20.0288	3.09242e-89	5.71552e-87
WBGene00009573	F40E10.5	423.491	-5.62089	0.38204	-14.7128	5.33429e-49	3.28634e-47
WBGene00012445	Y16B4A.2	4387.13	-5.62036	0.555481	-10.118	4.59741e-24	9.50333e-23
WBGene00000601	col-12	181.317	-5.60509	0.539632	-10.3869	2.84528e-25	6.2626e-24
WBGene00000214	asp-1	5657.7	-5.59835	0.563772	-9.93017	3.07727e-23	6.04298e-22
WBGene00019906	R05G9R.1	1653.08	-5.59375	0.230877	-24.2282	1.12201e-129	3.81121e-127
WBGene00220094	T25C12.12	199.187	-5.57644	0.468438	-11.9043	1.12369e-32	3.67775e-31
WBGene00000594	col-3	507.131	-5.56936	0.361835	-15.392	1.85275e-53	1.34598e-51
WBGene00011572	mam-5	237.89	-5.56023	0.388474	-14.313	1.81469e-46	1.00471e-44
WBGene00013872	ZC374.2	2165.36	-5.55312	0.227406	-24.4194	1.06337e-131	3.93071e-129
WBGene00006930	vit-6	3781.66	-5.53933	1.59849	-3.46535	0.000529547	0.00158877
WBGene00004232	ptr-18	1812.58	-5.53324	0.213828	-25.8771	1.20612e-147	6.31605e-145
WBGene00008496	F01D5.6	570.838	-5.53175	0.312027	-17.7284	2.52912e-70	2.88964e-68
WBGene00001063	dpy-1	3557.26	-5.51995	0.213258	-25.8839	1.00999e-147	5.51893e-145
WBGene00004300	ram-2	2428.66	-5.48047	0.652924	-8.39373	4.70941e-17	6.03957e-16
WBGene00000215	asp-2	975.665	-5.46322	0.272734	-20.0313	2.93662e-89	5.50858e-87
WBGene00010070	nep-17	11099.6	-5.45596	0.208527	-26.1642	6.78884e-151	4.26611e-148
WBGene00010714	mam-3	636.208	-5.44255	0.3007	-18.0996	3.21075e-73	4.29284e-71
WBGene00077697	F58E6.13	502.35	-5.43581	0.324072	-16.7735	3.81669e-63	3.63395e-61
WBGene00016805	C50D2.1	523.014	-5.38577	0.329389	-16.3508	4.29332e-60	3.69579e-58
WBGene00044796	W03D8.11	117.643	-5.36619	0.49994	-10.7337	7.07401e-27	1.73306e-25
WBGene00006929	vit-5	2071.07	-5.3521	1.86867	-2.86412	0.00418169	0.010303
WBGene00006926	vit-2	4997.6	-5.31719	1.76929	-3.00528	0.0026534	0.00685044
WBGene00019520	K08B12.1	3512.65	-5.30862	0.184417	-28.786	3.21321e-182	3.10643e-179
WBGene00021326	Y34B4A.10	584.506	-5.30718	0.310456	-17.0948	1.62328e-65	1.64527e-63
WBGene00004133	abu-13	3737.43	-5.29985	0.181641	-29.1777	3.72115e-187	3.89728e-184
WBGene00008743	F13D12.9	495.954	-5.27437	0.307682	-17.1423	7.18017e-66	7.33661e-64
WBGene00020033	R12E2.7	262.701	-5.26673	0.902881	-5.83325	5.43574e-09	3.35872e-08
WBGene00002268	lec-5	1371.36	-5.26643	0.856885	-6.14601	7.94548e-10	5.38613e-09
WBGene00011948	rocf-1	3606.23	-5.26359	0.282765	-18.6147	2.44028e-77	3.40771e-75
WBGene00000717	col-144	629.841	-5.24212	1.0946	-4.7891	1.67535e-06	7.54418e-06
WBGene00016731	C46H11.7	106.784	-5.22139	0.513496	-10.1683	2.74648e-24	5.78188e-23
WBGene00022274	Y73E7A.8	2351.41	-5.2106	0.213611	-24.393	2.03065e-131	7.29178e-129
WBGene00000683	col-109	1451.58	-5.2081	0.289506	-17.9896	2.35076e-72	2.95443e-70
WBGene00019017	F57F4.4	5902.29	-5.20556	0.20458	-25.4451	7.98978e-143	3.58627e-140
WBGene00001725	grl-16	3886.14	-5.20495	0.551934	-9.43039	4.08578e-21	6.92983e-20
WBGene00004221	ptr-6	1114.23	-5.19814	0.849532	-6.11882	9.42706e-10	6.34937e-09
WBGene00019285	cbn-1	833.697	-5.17992	0.2879	-17.9921	2.24635e-72	2.85173e-70
WBGene00016962	C56C10.4	720.427	-5.16396	0.886473	-5.82529	5.70132e-09	3.51418e-08
WBGene00016598	C42D4.13	192.525	-5.13967	0.906898	-5.66731	1.4506e-08	8.48353e-08
WBGene00021625	Y47D7A.13	3212.29	-5.13079	0.8021	-6.39669	1.5878e-10	1.1602e-09
WBGene00004230	ptr-16	555.936	-5.12394	0.28688	-17.8609	2.37662e-71	2.8447e-69
WBGene00012257	lpr-4	4694.54	-5.10497	0.197326	-25.8707	1.42236e-147	7.1505e-145
WBGene00013352	lon-8	1463.93	-5.09007	0.192381	-26.4582	2.93421e-154	2.16924e-151
WBGene00022577	nstp-3	369.727	-5.08707	0.328092	-15.505	3.20915e-54	2.38655e-52
WBGene00011075	R07A4.4	430.446	-5.07927	0.301981	-16.8198	1.74722e-63	1.68916e-61
WBGene00006589	tnt-4	1381.2	-5.07779	0.270299	-18.7859	9.85598e-79	1.51061e-76
WBGene00007552	C13C12.2	462.52	-5.06672	0.325354	-15.5729	1.11211e-54	8.52259e-53
WBGene00003075	lrx-1	287.01	-5.04124	0.325604	-15.4827	4.53707e-54	3.35423e-52
WBGene00011624	T08G5.3	183.532	-5.03213	0.447731	-11.2392	2.61792e-29	7.31157e-28
WBGene00008741	ctsa-1.2	1198.32	-5.02039	0.568839	-8.82569	1.08791e-18	1.57703e-17
WBGene00001581	gfi-1	5073.25	-5.01296	0.220117	-22.774	8.29216e-115	2.36854e-112
WBGene00012018	T25C12.3	5963.71	-4.98523	0.20929	-23.8197	2.08912e-125	6.73232e-123
WBGene00018630	F49D11.6	404.385	-4.98415	1.0127	-4.92164	8.58217e-07	3.9978e-06
WBGene00010505	K02D3.2	279.05	-4.97119	0.346694	-14.3388	1.25168e-46	6.99163e-45
WBGene00017569	F18E9.3	437.022	-4.96609	0.376779	-13.1804	1.13796e-39	5.08962e-38
WBGene00020803	T25E4.1	330.12	-4.9591	0.430522	-11.5188	1.06059e-30	3.15018e-29
WBGene00006756	unc-17	294.921	-4.95346	0.357674	-13.8491	1.28809e-43	6.58078e-42
WBGene00220093	T25C12.11	208.6	-4.94709	0.391438	-12.6383	1.29892e-36	5.05413e-35
WBGene00006952	wrt-6	973.843	-4.94632	0.233246	-21.2065	8.32507e-100	1.86838e-97
WBGene00010648	K08C7.6	152.006	-4.94206	0.440796	-11.2117	3.57398e-29	9.89378e-28
WBGene00000216	asp-3	4136.43	-4.9327	0.217781	-22.6499	1.39924e-113	3.90793e-111
WBGene00000172	aqp-4	427.797	-4.93124	0.33677	-14.6428	1.49857e-48	9.0115e-47
WBGene00000699	col-125	1623.26	-4.92969	1.35483	-3.63861	0.000274119	0.00086474
WBGene00007174	mboa-1	252.228	-4.91665	0.420572	-11.6904	1.42731e-31	4.45122e-30
WBGene00004058	pmp-1	218.116	-4.91559	0.409438	-12.0057	3.31713e-33	1.1029e-31
WBGene00020554	T19A5.3	5749.42	-4.91212	0.230992	-21.2654	2.37574e-100	5.42879e-98
WBGene00011104	cut-5	573.879	-4.90574	0.27681	-17.7224	2.81692e-70	3.18947e-68
WBGene00019148	H03E18.1	4765.2	-4.90441	0.205935	-23.8154	2.31553e-125	7.2754e-123
WBGene00003877	pept-1	1943.96	-4.90239	0.315875	-15.52	2.53926e-54	1.91098e-52
WBGene00009791	F46F3.3	269.46	-4.89831	0.362976	-13.4948	1.67734e-41	7.83672e-40
WBGene00018217	F40A3.2	961.58	-4.89498	0.275234	-17.7848	9.27697e-71	1.08965e-68
WBGene00019839	R02F11.1	3023.31	-4.87635	0.19711	-24.7392	4.05276e-135	1.64307e-132
WBGene00006955	wrt-9	1585.86	-4.86329	0.242576	-20.0485	2.07881e-89	3.95856e-87
WBGene00019617	ctsa-2	5023.7	-4.8551	0.575242	-8.44009	3.1708e-17	4.10832e-16
WBGene00010285	F58H1.2	777.936	-4.84622	0.310654	-15.6001	7.27316e-55	5.64253e-53
WBGene00010830	M02G9.1	2457.26	-4.84537	0.239392	-20.2403	4.32674e-91	8.57936e-89
WBGene00011796	T16G1.2	911.882	-4.84082	0.282119	-17.1588	5.40279e-66	5.61176e-64
WBGene00001476	fmo-1	540.254	-4.83614	0.339171	-14.2587	3.95682e-46	2.17158e-44
WBGene00004156	pqn-74	3177.21	-4.82895	0.270042	-17.8822	1.62253e-71	1.9798e-69
WBGene00009982	F53F1.4	1067.6	-4.82512	0.321272	-15.0188	5.53206e-51	3.77864e-49
WBGene00007368	C06B8.2	498.969	-4.78889	0.29987	-15.9698	2.07294e-57	1.65941e-55
WBGene00010673	K08E7.5	684.431	-4.786	0.827111	-5.7864	7.19101e-09	4.38084e-08
WBGene00000218	asp-5	1578.6	-4.78383	0.255355	-18.7341	2.61103e-78	3.86064e-76
WBGene00003003	lin-14	3018.5	-4.78057	0.215232	-22.2112	2.67561e-109	7.1547e-107
WBGene00022611	ZC449.1	361.325	-4.77511	0.332035	-14.3813	6.77665e-47	3.83644e-45
WBGene00022415	Y102A11A.5	975.402	-4.77414	0.32023	-14.9085	2.9019e-50	1.89954e-48
WBGene00011289	R102.2	170.358	-4.76231	0.45736	-10.4126	2.1719e-25	4.82269e-24
WBGene00004127	abu-12	656.394	-4.75311	0.800748	-5.93584	2.92348e-09	1.8632e-08
WBGene00009355	F33A8.7	756.998	-4.7526	0.241422	-19.6859	2.85017e-86	4.84066e-84
WBGene00020242	phat-5	868.244	-4.74929	0.266797	-17.8011	6.92453e-71	8.21014e-69
WBGene00009094	F23H12.5	3508.54	-4.73969	0.19505	-24.2999	1.96476e-130	6.85919e-128
WBGene00022610	ltah-1.2	206.847	-4.73448	0.481236	-9.83817	7.71003e-23	1.47713e-21
WBGene00013852	hhat-1	2188.47	-4.73082	0.201233	-23.5092	3.28384e-122	1.00662e-119
WBGene00011508	T05H10.3	13538.2	-4.70426	0.196554	-23.9337	1.36612e-126	4.51827e-124
WBGene00011836	mam-4	171.139	-4.69287	0.509513	-9.21051	3.2459e-20	5.15082e-19
WBGene00000599	col-10	945.73	-4.68033	0.850269	-5.50453	3.70149e-08	2.04935e-07
WBGene00000740	col-167	1018.21	-4.67604	0.812568	-5.75465	8.68225e-09	5.23099e-08
WBGene00000031	abu-8	299.881	-4.67372	0.400001	-11.6843	1.53404e-31	4.77224e-30
WBGene00000034	abu-11	421.697	-4.66934	0.713543	-6.54388	5.99447e-11	4.57706e-10
WBGene00012253	clec-50	222.862	-4.66008	0.397561	-11.7217	9.86964e-32	3.10104e-30
WBGene00010204	F57F5.1	309.152	-4.64085	0.791696	-5.86191	4.57576e-09	2.84412e-08
WBGene00010268	arrd-10	270.759	-4.63793	0.38413	-12.0739	1.45165e-33	4.87817e-32
WBGene00010723	cpg-7	117.084	-4.63192	0.45431	-10.1955	2.07686e-24	4.42407e-23
WBGene00001707	grh-1	436.218	-4.6222	0.729735	-6.33408	2.38762e-10	1.71669e-09
WBGene00009773	lipl-2	147.062	-4.61877	0.436876	-10.5723	4.0074e-26	9.46712e-25
WBGene00019957	R08E3.1	1866.32	-4.61834	0.257891	-17.9081	1.0198e-71	1.269e-69
WBGene00006927	vit-3	574.868	-4.6164	1.67147	-2.76189	0.00574687	0.0136899
WBGene00004993	spp-8	168.595	-4.61317	0.398939	-11.5636	6.30225e-31	1.89944e-29
WBGene00020576	T19D12.1	2720.88	-4.60674	0.543902	-8.4698	2.45811e-17	3.20805e-16
WBGene00011182	R09H10.5	2987.19	-4.60362	0.230795	-19.9468	1.59897e-88	2.87083e-86
WBGene00018951	F56C9.7	273.197	-4.6024	0.329889	-13.9513	3.08708e-44	1.60989e-42
WBGene00044623	bus-8	3029.45	-4.60094	0.229078	-20.0846	1.00629e-89	1.94569e-87
WBGene00001719	grl-10	1014.16	-4.58514	0.628418	-7.29632	2.95748e-13	2.79261e-12
WBGene00008150	mam-2	176.751	-4.55149	0.370075	-12.2988	9.19026e-35	3.29069e-33
WBGene00004234	ptr-20	249.336	-4.54638	0.421432	-10.7879	3.92584e-27	9.74609e-26
WBGene00019184	H10E21.4	420.099	-4.54389	0.311376	-14.5929	3.11569e-48	1.85082e-46
WBGene00013965	ZK287.4	2646.49	-4.52894	0.209057	-21.6637	4.51229e-104	1.11197e-101
WBGene00018572	lin-42	2421.17	-4.52756	0.241356	-18.7588	1.63912e-78	2.45243e-76
WBGene00003514	myo-2	3819.81	-4.52723	0.251164	-18.025	1.24049e-72	1.60727e-70
WBGene00017438	F13H8.5	1118.15	-4.52105	0.746047	-6.06001	1.36109e-09	9.00779e-09
WBGene00003104	mab-7	782.079	-4.51772	0.292367	-15.4522	7.28923e-54	5.35737e-52
WBGene00022160	Y71G12B.25	5125.95	-4.50442	0.209694	-21.4809	2.34661e-102	5.67158e-100
WBGene00022612	ZC449.2	708.318	-4.47758	0.228705	-19.5779	2.385e-85	3.99663e-83
WBGene00020281	T06A4.1	374.523	-4.47419	0.312308	-14.3262	1.50123e-46	8.34843e-45
WBGene00013896	ZC443.1	187.178	-4.45266	0.462383	-9.62981	5.98413e-22	1.07441e-20
WBGene00004264	qua-1	1510.71	-4.42635	0.235717	-18.7782	1.13873e-78	1.72428e-76
WBGene00000616	col-39	314.522	-4.42281	1.0286	-4.29984	1.7092e-05	6.6024e-05
WBGene00007949	C35A5.5	146.464	-4.4164	0.399692	-11.0495	2.20386e-28	5.90578e-27
WBGene00044395	R12C12.10	162.842	-4.41183	0.420798	-10.4844	1.01849e-25	2.30738e-24
WBGene00020192	T03F1.11	70.8324	-4.40751	0.663184	-6.64598	3.01208e-11	2.3749e-10
WBGene00022202	Y72A10A.1	83.4913	-4.37961	0.507423	-8.63108	6.07733e-18	8.30681e-17
WBGene00219436	C49H3.16	284.444	-4.37366	0.320507	-13.6461	2.13059e-42	1.06259e-40
WBGene00018282	F41D9.2	467.599	-4.36711	0.300788	-14.5189	9.1979e-48	5.30271e-46
WBGene00044898	let-383	329.403	-4.36703	0.342214	-12.7611	2.70298e-37	1.08534e-35
WBGene00010442	bus-12	379.517	-4.36244	0.291229	-14.9794	1.00079e-50	6.76234e-49
WBGene00017535	atf-8	649.596	-4.36237	0.64533	-6.7599	1.38088e-11	1.12694e-10
WBGene00013497	hex-5	146.674	-4.36142	0.47535	-9.17518	4.50827e-20	7.10025e-19
WBGene00006651	tts-2	7086.39	-4.34782	0.196005	-22.1822	5.10758e-109	1.33733e-106
WBGene00011235	suro-1	919.51	-4.34748	0.333677	-13.029	8.3683e-39	3.5773e-37
WBGene00022504	mam-1	512.697	-4.34742	0.244857	-17.755	1.57799e-70	1.81946e-68
WBGene00002348	myo-1	2876.07	-4.34535	0.243177	-17.8691	2.05327e-71	2.48129e-69
WBGene00006762	unc-25	320.661	-4.34252	0.352686	-12.3127	7.73946e-35	2.78709e-33
WBGene00020396	T10B5.10	161.601	-4.33701	0.442431	-9.80269	1.09631e-22	2.06884e-21
WBGene00015949	C18A11.3	156.369	-4.32646	0.41233	-10.4927	9.33153e-26	2.12077e-24
WBGene00001242	elo-4	622.052	-4.31037	0.244575	-17.6239	1.61572e-69	1.79702e-67
WBGene00012199	mltn-3	436.695	-4.30285	0.846594	-5.08254	3.72422e-07	1.81983e-06
WBGene00021942	madf-1	160.187	-4.28788	0.41653	-10.2943	7.47746e-25	1.6175e-23
WBGene00011880	T21B6.3	2941.35	-4.28533	0.261247	-16.4034	1.80952e-60	1.57931e-58
WBGene00000893	cyn-17	1983.36	-4.27911	0.214213	-19.9759	8.91944e-89	1.62463e-86
WBGene00004104	pqn-13	6988.32	-4.27592	0.227495	-18.7957	8.18859e-79	1.27055e-76
WBGene00016329	osr-1	599.379	-4.26655	0.326744	-13.0578	5.73792e-39	2.46123e-37
WBGene00006586	tni-4	930.91	-4.26485	0.259335	-16.4453	9.05733e-61	8.01638e-59
WBGene00020194	T03G6.1	1824.4	-4.26174	0.228433	-18.6564	1.12003e-77	1.61799e-75
WBGene00014666	C05D12.3	344.653	-4.25735	1.22094	-3.48695	0.000488562	0.00147354
WBGene00001690	grd-1	453.235	-4.25729	0.379041	-11.2318	2.84745e-29	7.91743e-28
WBGene00016733	phat-2	438.983	-4.25238	0.331411	-12.8311	1.09771e-37	4.46472e-36
WBGene00013542	lron-12	188.07	-4.24536	0.369248	-11.4973	1.36087e-30	4.02434e-29
WBGene00000611	col-34	2046.38	-4.24075	0.263072	-16.1201	1.84282e-58	1.50394e-56
WBGene00010008	F53H4.3	371.786	-4.23016	0.371446	-11.3883	4.77983e-30	1.37802e-28
WBGene00009561	F39D8.3	163.418	-4.2279	0.397277	-10.6422	1.89642e-26	4.5572e-25
WBGene00009292	F31D4.5	4666.88	-4.21244	0.202974	-20.7536	1.13761e-95	2.3829e-93
WBGene00022614	ZC449.4	86.1722	-4.20358	0.481432	-8.73141	2.51527e-18	3.53206e-17
WBGene00016134	C26B9.5	554.983	-4.20013	0.288976	-14.5346	7.3175e-48	4.2775e-46
WBGene00020660	T21G5.2	131.476	-4.19463	0.440736	-9.51732	1.77711e-21	3.10204e-20
WBGene00009331	F32D8.7	382.105	-4.17937	0.332102	-12.5846	2.56687e-36	9.8056e-35
WBGene00017991	clec-180	2698.32	-4.17633	0.20051	-20.8285	2.38629e-96	5.08319e-94
WBGene00000672	col-97	1755.04	-4.16763	0.242864	-17.1604	5.25778e-66	5.50665e-64
WBGene00007420	C07E3.10	163.372	-4.15349	0.409613	-10.14	3.66961e-24	7.62308e-23
WBGene00009158	F26E4.3	428.703	-4.15	0.281342	-14.7507	3.04476e-49	1.89438e-47
WBGene00008652	F10D11.6	2764.18	-4.14697	0.222303	-18.6546	1.15876e-77	1.65492e-75
WBGene00001385	far-1	7181.16	-4.14298	0.226174	-18.3176	5.98511e-75	8.17618e-73
WBGene00006865	slcf-2	156.36	-4.14024	0.458662	-9.02679	1.76784e-19	2.68661e-18
WBGene00017892	F28B4.3	3541.48	-4.13946	0.244107	-16.9576	1.69216e-64	1.67457e-62
WBGene00000739	col-166	1565.41	-4.125	0.334524	-12.331	6.16972e-35	2.24107e-33
WBGene00011335	T01E8.8	192.58	-4.11584	0.340669	-12.0817	1.3202e-33	4.47082e-32
WBGene00009318	F32B4.8	243.1	-4.10523	1.10733	-3.70733	0.000209458	0.000675338
WBGene00001612	glr-1	195.26	-4.10497	0.400972	-10.2375	1.34604e-24	2.88686e-23
WBGene00006587	tnt-2	327.578	-4.09183	0.353106	-11.5881	4.73433e-31	1.43722e-29
WBGene00017937	F30H5.3	20520.8	-4.09069	0.174481	-23.4449	1.48927e-121	4.45647e-119
WBGene00001863	him-4	3647.58	-4.0778	0.183315	-22.2448	1.26719e-109	3.46218e-107
WBGene00019435	K06A9.1	2858.55	-4.06895	0.270936	-15.0181	5.58529e-51	3.79437e-49
WBGene00020009	not found	394.606	-4.06827	0.393276	-10.3445	4.43015e-25	9.63289e-24
WBGene00007401	C07A9.5	188.042	-4.05535	1.04438	-3.88303	0.000103161	0.00035032
WBGene00017807	F26A1.9	73.3956	-4.05385	0.575673	-7.04193	1.89591e-12	1.6733e-11
WBGene00015300	C01F1.5	130.831	-4.05099	1.07486	-3.76887	0.000163989	0.000537563
WBGene00004999	spp-14	102.767	-4.04495	0.438818	-9.21783	3.03174e-20	4.82315e-19
WBGene00009218	acs-20	1524.53	-4.02744	0.237843	-16.9332	2.55901e-64	2.51263e-62
WBGene00003169	mec-5	183.242	-4.02578	0.435162	-9.25124	2.2191e-20	3.56646e-19
WBGene00022503	ZC13.2	74.4088	-4.01276	0.547618	-7.32766	2.34203e-13	2.23328e-12
WBGene00009408	F35C12.3	49.9731	-4.00911	0.596616	-6.71975	1.82034e-11	1.47031e-10
WBGene00006914	vha-5	1230.28	-3.9935	0.286116	-13.9576	2.82715e-44	1.48048e-42
WBGene00016328	pde-5	99.7175	-3.98956	0.500593	-7.96967	1.59095e-15	1.8361e-14
WBGene00019605	ctsa-4.1	74.0274	-3.98541	0.490511	-8.12501	4.4734e-16	5.38006e-15
WBGene00003986	mct-4	1827.68	-3.97991	0.234576	-16.9664	1.45624e-64	1.45254e-62
WBGene00022649	ZK84.1	1893.39	-3.97679	0.290424	-13.693	1.11725e-42	5.63918e-41
WBGene00015280	C01B10.6	747.179	-3.96751	0.293553	-13.5155	1.26727e-41	6.0102e-40
WBGene00019713	pqn-52	724.788	-3.96661	0.32242	-12.3026	8.76797e-35	3.14845e-33
WBGene00045481	M153.5	41.3088	-3.96138	0.655947	-6.03918	1.54896e-09	1.0203e-08
WBGene00004174	abu-14	6790.08	-3.95813	0.210517	-18.802	7.27585e-79	1.14304e-76
WBGene00017515	F16F9.4	284.431	-3.95254	0.27947	-14.143	2.06381e-45	1.11802e-43
WBGene00020743	mam-8	315.481	-3.94702	0.398761	-9.89821	4.23772e-23	8.25731e-22
WBGene00001468	flr-4	62.5791	-3.94419	0.524026	-7.52671	5.20358e-14	5.2277e-13
WBGene00008500	F01D5.10	159.663	-3.93499	0.362977	-10.8409	2.20403e-27	5.59601e-26
WBGene00019779	endu-2	176.789	-3.93456	0.405112	-9.7123	2.67246e-22	4.87482e-21
WBGene00007883	C33A12.4	189.63	-3.92526	0.331328	-11.847	2.22916e-32	7.14696e-31
WBGene00013880	mppb-1	81.5313	-3.92498	0.507276	-7.73737	1.01494e-14	1.09868e-13
WBGene00044500	T19E7.6	141.612	-3.9167	0.381464	-10.2676	9.86686e-25	2.12704e-23
WBGene00010987	R03C1.1	287.403	-3.90886	0.304975	-12.817	1.31756e-37	5.34165e-36
WBGene00011339	T01G5.1	144.662	-3.90592	0.451838	-8.64452	5.40329e-18	7.42982e-17
WBGene00016234	C29G2.6	508.095	-3.89778	0.279612	-13.94	3.62159e-44	1.88083e-42
WBGene00000286	cal-2	70.9467	-3.8884	0.534179	-7.2792	3.35794e-13	3.1471e-12
WBGene00018293	F41E6.12	349.147	-3.88673	0.318302	-12.2108	2.72042e-34	9.47096e-33
WBGene00006741	unc-1	990.362	-3.88435	0.201167	-19.3091	4.50442e-83	7.25789e-81
WBGene00015169	B0403.5	231.489	-3.87653	0.386232	-10.0368	1.05016e-23	2.11175e-22
WBGene00010335	F59F3.6	56.5448	-3.87167	0.684469	-5.65646	1.54528e-08	8.97462e-08
WBGene00020497	T14A8.2	154.921	-3.85708	0.502741	-7.67209	1.69212e-14	1.79313e-13
WBGene00020148	T01D1.3	67.8499	-3.84891	0.585353	-6.57537	4.85337e-11	3.73528e-10
WBGene00002128	inx-6	818.884	-3.84855	0.260901	-14.751	3.03152e-49	1.89438e-47
WBGene00000625	col-48	1069.55	-3.84275	0.271878	-14.1341	2.34191e-45	1.26323e-43
WBGene00008277	mltn-12	168.477	-3.84176	0.406067	-9.4609	3.05298e-21	5.23464e-20
WBGene00018640	F49E10.2	1131.02	-3.82575	0.233052	-16.4159	1.47249e-60	1.29415e-58
WBGene00013331	Y57G11C.42	255.965	-3.80734	0.867797	-4.38736	1.14734e-05	4.56032e-05
WBGene00018026	F35A5.4	98.0594	-3.80649	0.553255	-6.88016	5.97839e-12	5.03933e-11
WBGene00012934	gly-9	233.296	-3.79952	1.04141	-3.64846	0.000263821	0.00083456
WBGene00045269	F46G11.6	115.199	-3.79846	1.26886	-2.9936	0.00275709	0.00708177
WBGene00003736	nhx-9	657.502	-3.79407	0.84732	-4.47773	7.54425e-06	3.09654e-05
WBGene00015768	C14C11.4	77.8377	-3.78964	0.616757	-6.14447	8.02332e-10	5.4345e-09
WBGene00019619	asp-14	120.489	-3.7832	0.61851	-6.11663	9.5573e-10	6.43364e-09
WBGene00019424	aptf-1	45.962	-3.78054	0.613338	-6.16389	7.09808e-10	4.8483e-09
WBGene00012256	lpr-5	6714.9	-3.77617	0.186572	-20.2398	4.36887e-91	8.57936e-89
WBGene00013171	Y53F4B.25	451.938	-3.776	0.287195	-13.1479	1.74993e-39	7.7169e-38
WBGene00017193	F07C3.2	95.7092	-3.77431	0.438055	-8.61608	6.92863e-18	9.45483e-17
WBGene00002067	ifp-1	2222.69	-3.76922	0.253157	-14.8889	3.89343e-50	2.5223e-48
WBGene00012875	Y45F10B.13	749.557	-3.76901	0.317672	-11.8645	1.81017e-32	5.84839e-31
WBGene00000907	daf-11	107.456	-3.75874	0.579652	-6.48448	8.90402e-11	6.68892e-10
WBGene00044016	C35A5.10	42.2807	-3.75865	0.638931	-5.88272	4.03587e-09	2.52604e-08
WBGene00000741	col-168	363.857	-3.75784	0.387499	-9.69766	3.08484e-22	5.60264e-21
WBGene00012782	Y43C5A.2	853.173	-3.7577	0.22358	-16.8069	2.17086e-63	2.0827e-61
WBGene00008936	papl-1	67.7047	-3.75659	0.526821	-7.13068	9.98739e-13	9.03032e-12
WBGene00000603	col-14	1184.93	-3.7548	0.258599	-14.5198	9.0777e-48	5.25754e-46
WBGene00020237	phat-4	255.882	-3.75388	0.369398	-10.1621	2.92558e-24	6.13835e-23
WBGene00020983	W03D2.9	168.504	-3.75343	0.353205	-10.6268	2.23713e-26	5.35548e-25
WBGene00001713	grl-4	150.088	-3.75151	0.98318	-3.81569	0.000135801	0.000451163
WBGene00000664	col-89	94.5297	-3.7506	0.482088	-7.77991	7.2578e-15	7.97343e-14
WBGene00010191	dmsr-1	321.228	-3.74762	0.368112	-10.1807	2.41932e-24	5.13614e-23
WBGene00000733	col-160	410.897	-3.74059	1.05527	-3.54466	0.000393119	0.00120682
WBGene00020017	R12A1.3	573.03	-3.73485	0.281211	-13.2813	2.97227e-40	1.33891e-38
WBGene00008376	D1054.9	1877.51	-3.73092	0.223134	-16.7205	9.29138e-63	8.64993e-61
WBGene00017721	F22F7.3	126.377	-3.72376	0.418404	-8.89991	5.589e-19	8.25412e-18
WBGene00020083	R57.2	176.053	-3.72234	0.448083	-8.30727	9.79329e-17	1.23082e-15
WBGene00023407	cex-1	110.631	-3.72083	0.571668	-6.50873	7.57881e-11	5.74837e-10
WBGene00019097	F59B1.2	182.858	-3.71808	0.354762	-10.4805	1.06187e-25	2.40028e-24
WBGene00015753	C14B9.3	283.746	-3.71672	0.450098	-8.25758	1.48652e-16	1.83523e-15
WBGene00015566	C07D10.1	186.753	-3.70936	0.345738	-10.7288	7.45527e-27	1.82292e-25
WBGene00003178	mec-17	273.689	-3.70875	0.389079	-9.53215	1.54059e-21	2.70799e-20
WBGene00020455	fbxa-59	58.5855	-3.70638	0.61089	-6.06718	1.30174e-09	8.62886e-09
WBGene00019067	F58H7.1	89.9415	-3.70439	0.496857	-7.45564	8.94351e-14	8.82276e-13
WBGene00022410	Y97E10C.1	5740.13	-3.69703	0.500016	-7.39382	1.42666e-13	1.37608e-12
WBGene00006068	sto-6	68.4108	-3.69339	0.548904	-6.72867	1.7122e-11	1.38653e-10
WBGene00012942	Y47D3B.6	885.352	-3.69184	0.32534	-11.3476	7.6187e-30	2.17124e-28
WBGene00019682	K12H4.7	337.912	-3.68655	0.299287	-12.3178	7.26679e-35	2.6244e-33
WBGene00015620	C08G9.2	1181.4	-3.68654	0.20825	-17.7025	4.01153e-70	4.50151e-68
WBGene00001570	gei-13	18360.3	-3.68389	0.185394	-19.8706	7.3149e-88	1.27686e-85
WBGene00012382	ttr-16	1068.95	-3.68272	0.247235	-14.8957	3.51629e-50	2.28978e-48
WBGene00017794	mltn-13	40.8833	-3.67433	0.662769	-5.54391	2.95792e-08	1.65886e-07
WBGene00019064	myo-5	2353.78	-3.67316	0.212212	-17.3089	4.03022e-67	4.25646e-65
WBGene00018646	mul-1	67.5547	-3.66453	0.519808	-7.04979	1.79193e-12	1.58598e-11
WBGene00018292	F41E6.11	171.785	-3.6604	0.50649	-7.22699	4.93813e-13	4.58703e-12
WBGene00002140	inx-18	145.175	-3.65998	0.51808	-7.06451	1.61181e-12	1.43262e-11
WBGene00000681	col-107	1948.9	-3.65818	0.234614	-15.5923	8.21328e-55	6.33279e-53
WBGene00016259	C30F8.3	96.8142	-3.64782	0.441169	-8.26852	1.35629e-16	1.68105e-15
WBGene00044452	Y102E9.5	84.1677	-3.64754	0.44714	-8.15749	3.4206e-16	4.13765e-15
WBGene00013385	Y62E10A.19	328.509	-3.6453	0.402665	-9.05294	1.39172e-19	2.14353e-18
WBGene00008509	F01G10.6	126.931	-3.6439	0.466504	-7.81109	5.6697e-15	6.3227e-14
WBGene00000136	amt-4	190.116	-3.64265	0.477163	-7.63397	2.27638e-14	2.38016e-13
WBGene00019761	M03F8.1	181.434	-3.63655	0.458258	-7.93559	2.09492e-15	2.40008e-14
WBGene00008926	F17H10.2	261.377	-3.6347	0.346125	-10.5011	8.53595e-26	1.95766e-24
WBGene00001444	flp-1	167.024	-3.62701	0.332841	-10.8971	1.18942e-27	3.06953e-26
WBGene00009593	mam-7	113.995	-3.62584	0.581361	-6.23681	4.46589e-10	3.13036e-09
WBGene00019935	R07E4.1	521.647	-3.62526	0.261938	-13.8402	1.45891e-43	7.42333e-42
WBGene00013103	Y51H4A.7	220.071	-3.62506	0.484194	-7.48678	7.05825e-14	7.00143e-13
WBGene00014821	R10E8.7	38.7212	-3.62457	0.709521	-5.10847	3.2478e-07	1.59509e-06
WBGene00017429	F13D11.4	419.733	-3.61028	0.333256	-10.8333	2.39252e-27	6.038e-26
WBGene00016428	dmsr-7	64.7088	-3.61025	0.544818	-6.62653	3.43677e-11	2.6895e-10
WBGene00015956	C18B2.5	2144.75	-3.60201	0.18155	-19.8403	1.33732e-87	2.3024e-85
WBGene00001132	alp-1	6154.62	-3.60023	0.185825	-19.3743	1.27116e-83	2.0748e-81
WBGene00011590	bus-19	722.923	-3.59901	0.250533	-14.3654	8.53394e-47	4.80962e-45
WBGene00019261	H34I24.2	521.27	-3.59572	0.29624	-12.1378	6.65615e-34	2.2982e-32
WBGene00020283	T06A4.3	198.696	-3.59269	0.364908	-9.84547	7.17053e-23	1.37587e-21
WBGene00020626	T20F5.4	9191.47	-3.59242	0.243466	-14.7553	2.84254e-49	1.78625e-47
WBGene00017591	F19C7.1	1108.73	-3.58637	0.264293	-13.5697	6.05906e-42	2.95156e-40
WBGene00011112	R07E5.4	164.721	-3.58083	0.440831	-8.12292	4.55117e-16	5.46837e-15
WBGene00010605	K06G5.1	1751.12	-3.576	0.203371	-17.5836	3.2883e-69	3.62521e-67
WBGene00010049	F54D5.3	296.051	-3.56847	0.290334	-12.2909	1.01354e-34	3.6188e-33
WBGene00006407	lim-9	3527.2	-3.56677	0.17524	-20.3536	4.31339e-92	8.74365e-90
WBGene00001703	grd-14	73.3788	-3.56429	0.599762	-5.94284	2.80123e-09	1.7871e-08
WBGene00016542	C39H7.4	377.71	-3.56218	0.252662	-14.0986	3.87513e-45	2.08131e-43
WBGene00018377	hum-10	58.4255	-3.56104	0.663462	-5.36737	7.9894e-08	4.25109e-07
WBGene00001754	gst-6	46.8058	-3.5604	0.72107	-4.93766	7.90635e-07	3.69669e-06
WBGene00007214	C01A2.2	516.636	-3.55982	0.306833	-11.6018	4.03481e-31	1.23081e-29
WBGene00020277	T06A1.1	261.197	-3.55765	0.888619	-4.00357	6.23924e-05	0.000219342
WBGene00009144	del-3	308.599	-3.55393	0.309999	-11.4643	1.99284e-30	5.83824e-29
WBGene00015545	C06G1.1	1427.42	-3.544	0.202931	-17.4641	2.69133e-68	2.89099e-66
WBGene00010001	F53F8.4	156.024	-3.53787	0.466595	-7.58231	3.39445e-14	3.47406e-13
WBGene00011713	T11F9.12	1366.14	-3.53673	0.211448	-16.7262	8.44561e-63	7.92122e-61
WBGene00011856	T20D3.2	823.76	-3.53025	0.224427	-15.73	9.41385e-56	7.39458e-54
WBGene00007343	C05E7.1	408.491	-3.52575	0.253638	-13.9007	6.26887e-44	3.24227e-42
WBGene00006666	twk-11	1369.43	-3.51561	0.22443	-15.6646	2.64128e-55	2.06184e-53
WBGene00000042	acr-2	66.4921	-3.50701	0.60194	-5.82617	5.67131e-09	3.49912e-08
WBGene00019904	twk-49	99.3277	-3.50689	0.50617	-6.92828	4.25996e-12	3.64212e-11
WBGene00015645	lips-7	97.4279	-3.49723	0.603436	-5.79553	6.81048e-09	4.15909e-08
WBGene00007751	C26G2.2	275.767	-3.49519	0.792278	-4.41157	1.02622e-05	4.11273e-05
WBGene00019979	R09B5.11	120.645	-3.49329	0.542589	-6.43818	1.20913e-10	8.98657e-10
WBGene00004212	ptl-1	404.273	-3.49084	0.32303	-10.8066	3.20453e-27	8.03882e-26
WBGene00000557	cnc-3	142.283	-3.48809	0.471068	-7.40464	1.31502e-13	1.27426e-12
WBGene00015646	mlt-10	1941.08	-3.48528	0.183282	-19.016	1.25764e-80	2.00076e-78
WBGene00017073	D2096.6	451.143	-3.48425	0.333711	-10.4409	1.61256e-25	3.59975e-24
WBGene00003057	lon-3	256.559	-3.47795	0.358286	-9.70719	2.80975e-22	5.11782e-21
WBGene00015107	viro-2	174.932	-3.47472	0.401427	-8.65591	4.88975e-18	6.74581e-17
WBGene00011476	exc-12	259.398	-3.47429	0.32054	-10.8389	2.25207e-27	5.70645e-26
WBGene00007533	cbl-1	152.504	-3.47266	0.452231	-7.67895	1.60395e-14	1.70257e-13
WBGene00008076	lgc-43	208.522	-3.47209	0.414177	-8.38309	5.15542e-17	6.59458e-16
WBGene00017783	F25E5.2	43.4967	-3.46992	0.607663	-5.71027	1.12796e-08	6.67117e-08
WBGene00018515	F46G11.2	98.1703	-3.46973	0.47356	-7.32692	2.35506e-13	2.244e-12
WBGene00044724	R02E4.3	208.461	-3.46876	0.893737	-3.88119	0.000103945	0.000352791
WBGene00044294	C01B10.11	1101.81	-3.46869	0.207079	-16.7506	5.60509e-63	5.2966e-61
WBGene00021870	samt-1	892.624	-3.46471	0.228063	-15.1919	4.00161e-52	2.77858e-50
WBGene00000704	col-130	369.914	-3.46356	0.35531	-9.74798	1.88182e-22	3.49862e-21
WBGene00010573	K04H4.2	18590.6	-3.46043	0.162686	-21.2706	2.12474e-100	4.94513e-98
WBGene00020229	T05A8.3	217.737	-3.45766	0.456025	-7.58218	3.398e-14	3.47486e-13
WBGene00013746	lgc-55	93.5438	-3.45532	0.485957	-7.11035	1.15752e-12	1.03838e-11
WBGene00006690	twk-39	120.592	-3.4543	0.448448	-7.70278	1.3314e-14	1.4253e-13
WBGene00014033	arrd-15	77.2455	-3.45076	0.60986	-5.65828	1.52902e-08	8.8884e-08
WBGene00000720	col-147	490.124	-3.44683	1.36384	-2.5273	0.0114945	0.0253443
WBGene00001984	hog-1	143.813	-3.44562	0.354045	-9.73215	2.19903e-22	4.0524e-21
WBGene00011427	T04C12.1	153.631	-3.44009	0.343187	-10.024	1.19613e-23	2.38998e-22
WBGene00009679	F44D12.2	191.614	-3.43361	0.393859	-8.71785	2.83522e-18	3.95484e-17
WBGene00017420	F13B9.2	83.4229	-3.42987	0.496742	-6.90473	5.02996e-12	4.27427e-11
WBGene00008732	F13B12.4	143.634	-3.42904	0.414952	-8.26371	1.41218e-16	1.7486e-15
WBGene00006783	unc-47	60.6049	-3.42863	0.541383	-6.3331	2.40289e-10	1.72668e-09
WBGene00002057	ifd-1	1227.71	-3.42714	0.272076	-12.5963	2.21336e-36	8.50689e-35
WBGene00010834	mct-3	1424.17	-3.42609	0.203277	-16.8542	9.7655e-64	9.51417e-62
WBGene00018694	F52E1.5	174.194	-3.41908	0.401978	-8.50564	1.80594e-17	2.39168e-16
WBGene00020788	nep-22	721.859	-3.41706	0.339641	-10.0608	8.23277e-24	1.66886e-22
WBGene00013264	Y57A10A.24	98.1247	-3.41323	0.444921	-7.67156	1.69918e-14	1.7991e-13
WBGene00003887	osm-7	425.03	-3.40805	0.323938	-10.5207	6.9356e-26	1.60528e-24
WBGene00000541	cln-3.3	61.9287	-3.40676	0.58763	-5.79746	6.73268e-09	4.11558e-08
WBGene00000521	cky-1	647.274	-3.40353	0.682566	-4.98638	6.15216e-07	2.92106e-06
WBGene00012670	Y39B6A.8	97.4365	-3.3944	0.443423	-7.65499	1.93328e-14	2.03667e-13
WBGene00011971	lron-9	2369.8	-3.39328	0.187626	-18.0853	4.16247e-73	5.50673e-71
WBGene00021850	Y54F10AM.6	843.621	-3.39304	0.207431	-16.3574	3.852e-60	3.33875e-58
WBGene00018237	irg-7	8785.22	-3.38594	0.189298	-17.8869	1.49305e-71	1.83967e-69
WBGene00001727	grl-18	100.505	-3.3815	0.478948	-7.06026	1.66191e-12	1.47298e-11
WBGene00011888	cutl-15	402.991	-3.3798	0.287762	-11.7451	7.48254e-32	2.35691e-30
WBGene00003162	mdh-2	477.069	-3.37658	0.239939	-14.0726	5.59354e-45	2.99147e-43
WBGene00189995	C06E7.88	378.975	-3.36988	0.271868	-12.3953	2.77206e-35	1.01869e-33
WBGene00017781	F25E2.3	94.8368	-3.36917	0.422625	-7.97201	1.56113e-15	1.80333e-14
WBGene00010113	F55D12.5	736.146	-3.36588	0.2614	-12.8764	6.115e-38	2.53641e-36
WBGene00003533	nas-14	72.0269	-3.36318	0.551225	-6.10128	1.0522e-09	7.04532e-09
WBGene00016319	C32D5.12	593.587	-3.36002	0.247077	-13.5991	4.05427e-42	1.99039e-40
WBGene00021284	Y24D9A.6	59.7201	-3.35963	0.537654	-6.24868	4.13934e-10	2.90795e-09
WBGene00001705	grd-16	293.627	-3.35921	0.314286	-10.6884	1.15371e-26	2.78842e-25
WBGene00016273	C30G12.1	152.192	-3.35798	0.454121	-7.39446	1.41983e-13	1.37054e-12
WBGene00010150	F56D5.6	444.203	-3.35113	0.266661	-12.567	3.20664e-36	1.22124e-34
WBGene00011803	T16G12.1	1114.39	-3.34785	0.334375	-10.0122	1.34668e-23	2.67802e-22
WBGene00004102	pqn-10	97.6865	-3.34335	0.433282	-7.71633	1.19728e-14	1.28819e-13
WBGene00019273	H43E16.1	350.369	-3.34137	0.848856	-3.93632	8.27422e-05	0.000284827
WBGene00017430	bcl-11	3818.7	-3.34064	0.235303	-14.1972	9.54032e-46	5.1906e-44
WBGene00020571	lpr-7	577.2	-3.33195	0.245821	-13.5544	7.46393e-42	3.59412e-40
WBGene00021675	Y48G1BR.1	643.244	-3.3316	0.286143	-11.6431	2.48739e-31	7.68096e-30
WBGene00008860	romo-1	257.401	-3.32908	0.302612	-11.0012	3.77259e-28	9.98189e-27
WBGene00018713	F52G3.5	258.471	-3.32771	0.36428	-9.13501	6.54001e-20	1.01726e-18
WBGene00000047	acr-8	238.361	-3.32681	0.318424	-10.4478	1.50036e-25	3.35525e-24
WBGene00010926	M153.3	62.0504	-3.32514	0.644432	-5.1598	2.47219e-07	1.23003e-06
WBGene00019866	R04B3.1	243.594	-3.32463	0.426678	-7.7919	6.60106e-15	7.303e-14
WBGene00012255	lpr-6	2603.04	-3.32131	0.215895	-15.3839	2.09775e-53	1.5152e-51
WBGene00000785	cpr-5	150.643	-3.31773	0.440944	-7.52415	5.30661e-14	5.31845e-13
WBGene00219208	B0365.9	226.14	-3.31637	0.301244	-11.0089	3.46015e-28	9.17451e-27
WBGene00016160	C27D6.1	54.9467	-3.31471	0.566694	-5.84921	4.93912e-09	3.05938e-08
WBGene00020903	acd-5	82.9823	-3.31046	0.512288	-6.46212	1.03248e-10	7.72395e-10
WBGene00021879	clec-83	334.73	-3.30909	0.346204	-9.55822	1.19794e-21	2.1116e-20
WBGene00009496	F36H1.11	182.321	-3.3086	0.408479	-8.0998	5.50514e-16	6.57686e-15
WBGene00002018	hsp-16.41	813.167	-3.30839	0.765149	-4.32386	1.53324e-05	5.96772e-05
WBGene00002050	ifa-1	834.206	-3.30196	0.295386	-11.1784	5.19948e-29	1.42368e-27
WBGene00000219	asp-6	1833.19	-3.29934	0.258631	-12.757	2.85144e-37	1.1413e-35
WBGene00019030	exc-6	1076.61	-3.29666	0.182623	-18.0517	7.64522e-73	1.00089e-70
WBGene00010811	hmit-1.3	258.163	-3.28941	0.442334	-7.43649	1.03399e-13	1.01367e-12
WBGene00018040	F35D2.2	51.9029	-3.28672	0.611494	-5.37489	7.66294e-08	4.08257e-07
WBGene00012201	W02B12.1	171.868	-3.28474	0.430224	-7.63495	2.25908e-14	2.36404e-13
WBGene00003175	mec-12	1063.74	-3.28386	0.253949	-12.9312	3.00222e-38	1.2494e-36
WBGene00004115	pqn-26	1821.85	-3.27786	0.243312	-13.4718	2.29182e-41	1.06286e-39
WBGene00016237	C29H12.6	676.457	-3.27678	0.240036	-13.6512	1.98562e-42	9.94235e-41
WBGene00006583	tnc-2	766.717	-3.27431	0.282651	-11.5843	4.94981e-31	1.49902e-29
WBGene00009394	clec-63	1089.54	-3.27005	0.256871	-12.7303	4.01154e-37	1.60054e-35
WBGene00021645	Y47G6A.19	94.3775	-3.26929	0.576013	-5.67572	1.38105e-08	8.08807e-08
WBGene00008260	C52G5.2	918.766	-3.26899	0.220791	-14.8058	1.34297e-49	8.61147e-48
WBGene00007916	C34C6.3	258.747	-3.26826	0.312616	-10.4545	1.39681e-25	3.13483e-24
WBGene00010790	sodh-1	846.226	-3.26802	0.311704	-10.4844	1.01893e-25	2.30738e-24
WBGene00022423	nhr-41	1830	-3.26726	0.178185	-18.3363	4.24619e-75	5.86441e-73
WBGene00022633	ZC581.3	315.338	-3.26425	0.313132	-10.4245	1.91638e-25	4.27041e-24
WBGene00001054	dpf-1	134.33	-3.26122	0.520356	-6.2673	3.67367e-10	2.58949e-09
WBGene00012222	W03C9.6	221.031	-3.25508	0.423968	-7.67765	1.62035e-14	1.71853e-13
WBGene00044630	bus-17	381.655	-3.25364	0.27617	-11.7813	4.8729e-32	1.54653e-30
WBGene00018024	F35A5.1	2754.76	-3.24994	0.216368	-15.0204	5.39706e-51	3.70657e-49
WBGene00022641	ZK6.6	63.7826	-3.24927	0.526111	-6.17601	6.57422e-10	4.51255e-09
WBGene00044612	Y57E12AR.1	71.2199	-3.24324	0.602615	-5.38194	7.36884e-08	3.93924e-07
WBGene00016218	pals-23	100.542	-3.24041	0.537495	-6.02872	1.65262e-09	1.0829e-08
WBGene00009578	F40F8.5	443.978	-3.23963	0.358092	-9.04691	1.47066e-19	2.25681e-18
WBGene00000689	col-115	88.1913	-3.23534	0.542534	-5.96338	2.47071e-09	1.58915e-08
WBGene00010901	M28.10	43.0226	-3.23369	0.655382	-4.93405	8.05411e-07	3.76158e-06
WBGene00022382	Y94H6A.10	245.523	-3.2335	0.28929	-11.1774	5.26205e-29	1.43768e-27
WBGene00009205	F28C6.5	40.3922	-3.23144	0.622413	-5.19179	2.08278e-07	1.04831e-06
WBGene00000176	aqp-8	88.1604	-3.23052	0.469559	-6.8799	5.98944e-12	5.04526e-11
WBGene00020551	T17H7.7	709.24	-3.22974	0.276682	-11.6731	1.7497e-31	5.4297e-30
WBGene00017597	F19C7.8	827.027	-3.22934	0.199641	-16.1758	7.47678e-59	6.26455e-57
WBGene00018736	F53B1.3	32.0313	-3.22568	0.662286	-4.87053	1.113e-06	5.11639e-06
WBGene00012168	W01A8.6	120.322	-3.22389	0.500929	-6.43582	1.22805e-10	9.1164e-10
WBGene00004764	sel-7	635.253	-3.22245	0.218547	-14.7449	3.31908e-49	2.05489e-47
WBGene00018073	F35H10.10	7202.85	-3.22058	0.172316	-18.69	5.97141e-78	8.72659e-76
WBGene00010851	M04C3.2	25.1017	-3.21088	0.76974	-4.17138	3.02759e-05	0.00011198
WBGene00010274	F58G6.3	17.6541	-3.20982	0.872046	-3.6808	0.000232505	0.000741844
WBGene00016585	oac-59	79.5849	-3.20697	0.446999	-7.17445	7.25972e-13	6.65987e-12
WBGene00011272	dtmk-1	3039.04	-3.19992	0.209452	-15.2776	1.07863e-52	7.61585e-51
WBGene00016677	C45G9.6	57.4854	-3.19911	0.577962	-5.53515	3.10956e-08	1.74003e-07
WBGene00011530	T06D8.10	1327.93	-3.19874	0.245628	-13.0227	9.08995e-39	3.85954e-37
WBGene00000941	ddp-1	72.4365	-3.19671	0.537556	-5.94675	2.73512e-09	1.74936e-08
WBGene00017227	F07G6.8	22.9763	-3.19448	0.808363	-3.95179	7.757e-05	0.000267756
WBGene00019776	M6.4	33.1403	-3.19173	0.698247	-4.57107	4.85241e-06	2.05337e-05
WBGene00022047	Y66H1A.5	67.4811	-3.18729	0.572327	-5.569	2.56209e-08	1.44526e-07
WBGene00002037	hum-4	7806.4	-3.17983	0.170698	-18.6284	1.89078e-77	2.67004e-75
WBGene00007800	C29A12.6	366.291	-3.1798	0.736841	-4.31546	1.59274e-05	6.18021e-05
WBGene00020806	T25F10.3	704.491	-3.17381	0.275519	-11.5194	1.05366e-30	3.13802e-29
WBGene00019868	R04B3.3	280.041	-3.16423	0.417918	-7.57141	3.6919e-14	3.76316e-13
WBGene00021353	iglr-3	259.212	-3.16017	0.325298	-9.71469	2.61052e-22	4.77569e-21
WBGene00015426	C04E6.12	66.883	-3.15864	0.586208	-5.38825	7.11459e-08	3.81631e-07
WBGene00004112	pqn-22	1032.85	-3.15273	0.3038	-10.3776	3.13434e-25	6.86279e-24
WBGene00000497	chs-2	1781.44	-3.1476	0.24977	-12.602	2.05863e-36	7.93648e-35
WBGene00021963	lipl-6	176.142	-3.14755	0.370599	-8.49312	2.01157e-17	2.64726e-16
WBGene00003958	pcp-3	632.623	-3.14739	0.281972	-11.1621	6.25188e-29	1.70442e-27
WBGene00010222	F57G12.2	140.756	-3.14692	0.40196	-7.82893	4.92031e-15	5.50654e-14
WBGene00010944	M176.5	124.587	-3.14414	0.413704	-7.59996	2.96229e-14	3.05917e-13
WBGene00020976	oac-51	921.135	-3.14041	0.238915	-13.1445	1.83035e-39	8.04332e-38
WBGene00022155	Y71G12B.17	245.047	-3.13852	0.347214	-9.03914	1.57905e-19	2.42018e-18
WBGene00006777	unc-41	3160.3	-3.13703	0.232342	-13.5017	1.5271e-41	7.18825e-40
WBGene00008776	F13H10.5	1137.47	-3.13496	0.21589	-14.5211	8.90603e-48	5.18199e-46
WBGene00001461	flp-18	68.8	-3.1335	0.540144	-5.80123	6.58289e-09	4.02793e-08
WBGene00006634	tsp-8	80.7425	-3.13077	0.589026	-5.31517	1.06559e-07	5.58712e-07
WBGene00008731	F13B12.3	129.646	-3.1267	0.471212	-6.63544	3.23532e-11	2.54134e-10
WBGene00006672	twk-18	423.929	-3.12586	0.298582	-10.469	1.19874e-25	2.69513e-24
WBGene00010057	F54D5.15	380.762	-3.12474	0.240914	-12.9703	1.80235e-38	7.55064e-37
WBGene00018738	swip-10	182.922	-3.12073	0.33347	-9.35834	8.09984e-21	1.35913e-19
WBGene00010348	H01G02.1	87.5567	-3.11787	0.438418	-7.11164	1.14671e-12	1.02942e-11
WBGene00004267	rab-3	432.027	-3.11778	0.330565	-9.43168	4.03573e-21	6.8542e-20
WBGene00000822	csq-1	1624.62	-3.11536	0.204562	-15.2294	2.25599e-52	1.58398e-50
WBGene00000447	ceh-24	58.4962	-3.11455	0.522127	-5.96512	2.44447e-09	1.57387e-08
WBGene00019756	M03E7.4	276.597	-3.1087	0.339554	-9.15524	5.42357e-20	8.50979e-19
WBGene00001403	fbl-1	464.905	-3.10666	0.245623	-12.6481	1.14641e-36	4.47456e-35
WBGene00011708	T11B7.5	13.191	-3.10576	0.996434	-3.11688	0.00182777	0.00489273
WBGene00001710	grl-1	130.796	-3.10521	0.364172	-8.52676	1.50501e-17	1.99946e-16
WBGene00008205	sams-1	7170.19	-3.101	0.20761	-14.9367	1.90253e-50	1.26513e-48
WBGene00013180	cutl-10	283.469	-3.09944	0.287508	-10.7803	4.26326e-27	1.05474e-25
WBGene00006832	unc-105	473.299	-3.09874	0.280651	-11.0413	2.41636e-28	6.44773e-27
WBGene00010683	K08F8.7	175.597	-3.09751	0.316342	-9.79165	1.22283e-22	2.29724e-21
WBGene00010522	K03A11.5	53.9509	-3.09487	0.544806	-5.68068	1.34163e-08	7.86457e-08
WBGene00020196	T03G11.3	193.326	-3.09131	0.324485	-9.52682	1.62174e-21	2.84665e-20
WBGene00017950	F31E3.2	208.182	-3.09095	0.440291	-7.02025	2.21469e-12	1.93966e-11
WBGene00021939	Y55F3BR.2	1052.66	-3.08688	0.220257	-14.0149	1.26394e-44	6.70261e-43
WBGene00044445	C02F5.14	74.4869	-3.08245	0.532324	-5.79055	7.01553e-09	4.28223e-08
WBGene00021157	Y4C6B.3	24.1139	-3.08228	0.756549	-4.07413	4.61859e-05	0.000165752
WBGene00002025	hsp-60	2630.03	-3.08134	0.199579	-15.4392	8.92226e-54	6.51947e-52
WBGene00008263	C53A5.2	289.765	-3.07868	0.313131	-9.83193	8.20296e-23	1.56918e-21
WBGene00015794	C15F1.1	116.494	-3.0755	0.535448	-5.74378	9.25839e-09	5.54092e-08
WBGene00016448	C35D10.12	72.6695	-3.07543	0.476264	-6.4574	1.06516e-10	7.95419e-10
WBGene00008644	F10C2.3	83.9058	-3.07527	0.460091	-6.68404	2.32439e-11	1.85361e-10
WBGene00000781	cpr-1	23.3048	-3.07472	0.801303	-3.83715	0.00012447	0.000416159
WBGene00007344	C05E7.2	99.7064	-3.06961	0.564081	-5.4418	5.27458e-08	2.86478e-07
WBGene00011952	T23F6.5	264.585	-3.06611	0.437783	-7.00373	2.4924e-12	2.1738e-11
WBGene00008707	F11E6.3	138.583	-3.06598	0.362542	-8.45689	2.74599e-17	3.56893e-16
WBGene00008270	C53A5.13	84.7289	-3.06387	0.592436	-5.17165	2.32033e-07	1.15814e-06
WBGene00020384	T09D3.3	212.21	-3.05901	0.360103	-8.49482	1.98237e-17	2.61706e-16
WBGene00020847	cgr-1	32.4698	-3.05508	0.664923	-4.59464	4.33501e-06	1.84499e-05
WBGene00018369	mig-39	1211.88	-3.0518	0.196411	-15.5378	1.92471e-54	1.46605e-52
WBGene00020343	acs-3	308.122	-3.04425	0.343685	-8.85769	8.16919e-19	1.19107e-17
WBGene00008477	clec-17	156.655	-3.04243	0.333001	-9.13641	6.4558e-20	1.00541e-18
WBGene00011400	T03F6.4	53.2277	-3.03947	0.630995	-4.81695	1.45766e-06	6.60414e-06
WBGene00019828	R02E12.4	72.4567	-3.03655	0.617951	-4.91389	8.9286e-07	4.15302e-06
WBGene00004921	snt-1	75.6166	-3.0333	0.536079	-5.65831	1.5287e-08	8.8884e-08
WBGene00015647	C09F5.1	1413.33	-3.03164	0.209604	-14.4636	2.056e-47	1.1799e-45
WBGene00003526	nas-7	189.805	-3.02889	0.509359	-5.94647	2.73984e-09	1.7506e-08
WBGene00004507	rpy-1	484.684	-3.02621	0.280099	-10.8041	3.29318e-27	8.22837e-26
WBGene00006809	unc-77	186.422	-3.0251	0.331639	-9.12165	7.39883e-20	1.14801e-18
WBGene00007935	C34E11.2	374.36	-3.01941	0.299761	-10.0727	7.29382e-24	1.48572e-22
WBGene00006748	unc-8	157.616	-3.01054	0.406225	-7.41103	1.2532e-13	1.21718e-12
WBGene00011433	pde-1	403.998	-3.00837	0.275171	-10.9327	8.04199e-28	2.08826e-26
WBGene00002146	ipp-5	324.032	-3.00791	0.285782	-10.5252	6.61261e-26	1.53902e-24
WBGene00014261	shk-1	314.19	-3.00654	0.313145	-9.60111	7.90856e-22	1.40388e-20
WBGene00008292	C54C8.4	41.6552	-3.00623	0.590513	-5.09088	3.56412e-07	1.74431e-06
WBGene00002011	hsp-12.2	484.626	-3.00362	0.323933	-9.27235	1.82091e-20	2.94912e-19
WBGene00044260	Y87G2A.19	154.369	-2.99672	0.426188	-7.03145	2.04396e-12	1.79263e-11
WBGene00003590	nex-3	171.365	-2.99571	0.3261	-9.18647	4.05939e-20	6.4013e-19
WBGene00017970	F32A5.4	668.447	-2.99475	0.22837	-13.1136	2.75191e-39	1.2009e-37
WBGene00018214	F39H12.3	83.067	-2.99306	0.532011	-5.62594	1.845e-08	1.05881e-07
WBGene00016133	C26B9.3	1146.69	-2.99085	0.201231	-14.8628	5.74979e-50	3.70581e-48
WBGene00014054	dbt-1	351.644	-2.98973	0.309656	-9.65502	4.6806e-22	8.42776e-21
WBGene00003956	pcp-1	559.178	-2.98611	0.318502	-9.37549	6.88553e-21	1.15847e-19
WBGene00016898	clik-2	415.44	-2.98354	0.418901	-7.1223	1.06141e-12	9.5694e-12
WBGene00020309	T07D3.6	37.5594	-2.98339	0.59657	-5.0009	5.70645e-07	2.72902e-06
WBGene00013316	Y57G11C.21	24.9818	-2.98312	0.765026	-3.89937	9.64414e-05	0.000328921
WBGene00009326	F32D8.1	113.021	-2.9826	0.434227	-6.86877	6.47595e-12	5.43323e-11
WBGene00013592	Y81G3A.4	80.5841	-2.98046	0.452104	-6.59242	4.32708e-11	3.34869e-10
WBGene00010010	gmeb-2	1130.73	-2.97454	0.202732	-14.6723	9.70527e-49	5.89255e-47
WBGene00013426	Y66A7A.7	86.5016	-2.97451	0.517507	-5.74778	9.04252e-09	5.43763e-08
WBGene00001608	R07B1.8	82.8802	-2.97446	0.564102	-5.27291	1.34277e-07	6.9563e-07
WBGene00007041	tag-180	308.638	-2.97374	0.318461	-9.33784	9.83152e-21	1.63876e-19
WBGene00000037	ace-3	1171.17	-2.96725	0.217639	-13.6339	2.51924e-42	1.24653e-40
WBGene00020836	lgc-34	350.784	-2.96656	0.2856	-10.3871	2.83836e-25	6.25834e-24
WBGene00001702	grd-13	118.167	-2.96523	0.429275	-6.90754	4.93128e-12	4.1961e-11
WBGene00004346	rgs-3	176.121	-2.96522	0.346286	-8.56292	1.1004e-17	1.47051e-16
WBGene00003816	asns-1	264.055	-2.96355	0.31218	-9.49307	2.24318e-21	3.88324e-20
WBGene00016292	tbc-7	1273.51	-2.96037	0.197919	-14.9575	1.39133e-50	9.35093e-49
WBGene00014131	sdz-38	105.466	-2.95781	0.578913	-5.10925	3.23446e-07	1.58916e-06
WBGene00002987	lim-4	135.239	-2.95562	0.554413	-5.33107	9.76367e-08	5.14507e-07
WBGene00016130	C26B2.8	238.682	-2.95468	0.344214	-8.58384	9.17574e-18	1.23074e-16
WBGene00001122	dyf-6	200.406	-2.95421	0.353611	-8.35442	6.57541e-17	8.34745e-16
WBGene00022827	ZK816.4	81.888	-2.95403	0.435992	-6.77541	1.24051e-11	1.01834e-10
WBGene00004207	ptb-1	1628.51	-2.95396	0.251272	-11.7561	6.57378e-32	2.07586e-30
WBGene00003531	nas-12	47.0399	-2.9536	0.644287	-4.58429	4.5553e-06	1.93285e-05
WBGene00004210	ptc-3	6321.74	-2.9522	0.186695	-15.813	2.53121e-56	2.01343e-54
WBGene00003876	pept-2	81.6399	-2.94651	0.438615	-6.71777	1.84527e-11	1.48854e-10
WBGene00006915	vha-6	2061.27	-2.94438	0.177514	-16.5867	8.69386e-62	7.8046e-60
WBGene00002259	lbp-7	61.9461	-2.93993	0.50551	-5.81577	6.03543e-09	3.70921e-08
WBGene00018566	F47E1.2	158.235	-2.93523	0.435692	-6.73695	1.61751e-11	1.31324e-10
WBGene00001552	gcy-32	54.8737	-2.9319	0.524409	-5.59086	2.25954e-08	1.28149e-07
WBGene00022474	zig-9	140.953	-2.9295	0.376487	-7.78114	7.18731e-15	7.91675e-14
WBGene00019540	K08D12.6	181.478	-2.92655	1.45865	-2.00634	0.0448201	0.0833407
WBGene00022680	ZK180.6	372.519	-2.92596	0.394272	-7.42118	1.16077e-13	1.13101e-12
WBGene00016242	C30A5.10	390.716	-2.92375	0.290853	-10.0523	8.97091e-24	1.81264e-22
WBGene00020195	T03G6.3	976.704	-2.92178	0.256426	-11.3943	4.46635e-30	1.29339e-28
WBGene00020662	T21H3.1	59.9819	-2.92101	0.605607	-4.82328	1.41216e-06	6.41185e-06
WBGene00000963	dhp-1	262.242	-2.91843	0.355766	-8.20323	2.34007e-16	2.85534e-15
WBGene00008929	F18A11.2	506.085	-2.91362	0.22924	-12.7099	5.207e-37	2.0644e-35
WBGene00011571	ttr-46	149.835	-2.9128	0.448763	-6.49073	8.5423e-11	6.43643e-10
WBGene00010931	M162.5	40.6852	-2.91081	0.613124	-4.74751	2.0594e-06	9.15546e-06
WBGene00000493	che-14	459.488	-2.90873	0.327132	-8.89164	6.02156e-19	8.85134e-18
WBGene00006064	sto-2	105.662	-2.90756	0.38007	-7.65005	2.00895e-14	2.10932e-13
WBGene00000488	che-7	253.523	-2.90675	0.280764	-10.353	4.05443e-25	8.83121e-24
WBGene00012826	dyf-19	209.867	-2.90302	0.293773	-9.88188	4.98891e-23	9.67602e-22
WBGene00009190	F27D4.6	460.317	-2.90126	0.233555	-12.4222	1.98109e-35	7.34465e-34
WBGene00003495	mup-2	9571.14	-2.90064	0.209075	-13.8737	9.14559e-44	4.71073e-42
WBGene00022191	Y71H2B.1	28.2891	-2.90055	0.699621	-4.14588	3.3851e-05	0.000124288
WBGene00044792	F59C6.14	38.8714	-2.89994	0.669472	-4.33169	1.47972e-05	5.78087e-05
WBGene00001113	dur-1	327.212	-2.89965	0.376051	-7.7108	1.25036e-14	1.34312e-13
WBGene00008727	F13A7.12	153.891	-2.89944	0.38375	-7.55553	4.17145e-14	4.22063e-13
WBGene00001715	grl-6	36.9978	-2.89884	0.732685	-3.95646	7.60676e-05	0.000263076
WBGene00016311	efr-3	1155.27	-2.89845	0.199328	-14.5412	6.64509e-48	3.9026e-46
WBGene00009350	F32H5.4	41.1029	-2.89837	0.650561	-4.45518	8.38225e-06	3.41375e-05
WBGene00006585	tni-3	167.431	-2.89767	0.389008	-7.44886	9.4148e-14	9.26587e-13
WBGene00003567	ncx-2	4727.28	-2.89438	0.177812	-16.2777	1.42054e-59	1.20631e-57
WBGene00012948	dhhc-2	186.228	-2.88994	0.297942	-9.69968	3.02449e-22	5.50099e-21
WBGene00007999	tag-297	862.101	-2.88976	0.233016	-12.4015	2.56391e-35	9.44962e-34
WBGene00019346	K02G10.5	189.868	-2.88725	0.311596	-9.26602	1.93215e-20	3.12125e-19
WBGene00003388	moe-3	378.813	-2.88635	0.256189	-11.2665	1.92137e-29	5.4022e-28
WBGene00009958	madd-4	1143.92	-2.88288	0.220462	-13.0766	4.4812e-39	1.93539e-37
WBGene00017478	cest-26	153.622	-2.88167	0.370875	-7.76993	7.85317e-15	8.58249e-14
WBGene00044227	C07A9.13	74.2601	-2.87755	0.46679	-6.16453	7.06909e-10	4.83112e-09
WBGene00014178	ZK1010.4	65.4349	-2.87693	0.506162	-5.68381	1.31725e-08	7.73608e-08
WBGene00021984	Y59C2A.1	105.422	-2.87645	0.454623	-6.32711	2.49793e-10	1.79087e-09
WBGene00018154	exos-9	764.185	-2.87569	0.226943	-12.6714	8.51743e-37	3.34522e-35
WBGene00017174	tat-6	14.2747	-2.87263	0.968374	-2.96645	0.00301261	0.00766447
WBGene00006363	syd-1	1313.13	-2.87024	0.172485	-16.6405	3.54471e-62	3.20503e-60
WBGene00019538	K08D12.4	56.6919	-2.86852	0.535438	-5.35732	8.44639e-08	4.47908e-07
WBGene00018984	F56F10.1	248.333	-2.86429	0.465944	-6.14727	7.88282e-10	5.34942e-09
WBGene00004155	pqn-73	8411.56	-2.8584	0.194877	-14.6677	1.03818e-48	6.27298e-47
WBGene00009155	lhfp-4	188.111	-2.85547	0.374937	-7.61587	2.61922e-14	2.72503e-13
WBGene00017762	F23H11.7	72.3714	-2.85091	0.499337	-5.70938	1.13387e-08	6.70293e-08
WBGene00001701	grd-12	88.6022	-2.84904	0.474187	-6.00826	1.87529e-09	1.22093e-08
WBGene00007185	nlp-36	313.539	-2.84783	0.280037	-10.1695	2.71403e-24	5.73275e-23
WBGene00000745	col-172	77.7555	-2.84257	0.459559	-6.18542	6.19382e-10	4.26309e-09
WBGene00016022	C23H3.9	2220.45	-2.83784	0.19642	-14.4478	2.58868e-47	1.47884e-45
WBGene00009133	bed-3	1846.88	-2.83548	0.175721	-16.1363	1.41812e-58	1.17256e-56
WBGene00011077	R07B1.5	53.4309	-2.83262	0.609425	-4.64802	3.35131e-06	1.44889e-05
WBGene00000513	ckb-3	17.4743	-2.83228	0.863823	-3.27877	0.00104261	0.00293471
WBGene00044488	Y54G2A.45	61.9764	-2.82592	0.471884	-5.98858	2.11675e-09	1.3713e-08
WBGene00009475	F36F2.1	43.0998	-2.82365	0.63771	-4.42779	9.52025e-06	3.8325e-05
WBGene00001691	grd-2	104.643	-2.82315	0.531471	-5.31194	1.08462e-07	5.67979e-07
WBGene00001189	egl-21	910.94	-2.81891	0.212046	-13.2938	2.51372e-40	1.13642e-38
WBGene00022608	madf-9	59.488	-2.81854	0.538215	-5.23682	1.63368e-07	8.35995e-07
WBGene00010275	acc-1	102.214	-2.81544	0.452413	-6.22317	4.87219e-10	3.39809e-09
WBGene00020378	T09B4.4	113.793	-2.8149	0.411848	-6.8348	8.21179e-12	6.82579e-11
WBGene00011217	R10E11.5	78.58	-2.81164	0.631128	-4.45494	8.39175e-06	3.4154e-05
WBGene00019263	H35B03.1	103.834	-2.80786	0.408836	-6.86794	6.51342e-12	5.46102e-11
WBGene00010060	F54E4.4	42.4044	-2.80689	0.628452	-4.46635	7.95657e-06	3.25515e-05
WBGene00008401	D2005.6	950.69	-2.8059	0.238261	-11.7766	5.15361e-32	1.6315e-30
WBGene00019160	nlp-49	69.5026	-2.80231	0.564214	-4.96674	6.8087e-07	3.21336e-06
WBGene00000630	col-53	91.1332	-2.8022	0.656144	-4.2707	1.94857e-05	7.45273e-05
WBGene00015716	sox-4	106.018	-2.80193	0.399207	-7.01874	2.23871e-12	1.95934e-11
WBGene00004032	pkc-1	1626.43	-2.80164	0.167565	-16.7197	9.41998e-63	8.70517e-61
WBGene00009621	fipr-21	59.2002	-2.79993	0.583664	-4.79716	1.60932e-06	7.26113e-06
WBGene00012175	W01C9.1	60.0608	-2.79409	0.78142	-3.57566	0.000349349	0.00108464
WBGene00021583	clec-72	131.506	-2.79167	0.471559	-5.92008	3.2178e-09	2.04146e-08
WBGene00004225	ptr-11	782.04	-2.79163	0.21699	-12.8652	7.06233e-38	2.89119e-36
WBGene00000273	brp-1	4909.66	-2.79026	0.300216	-9.29416	1.4838e-20	2.42502e-19
WBGene00017076	D2096.9	64.688	-2.78632	0.47371	-5.8819	4.05578e-09	2.53597e-08
WBGene00018971	clec-67	131.527	-2.78618	0.530949	-5.24754	1.54141e-07	7.91035e-07
WBGene00006408	tag-18	229.465	-2.78449	1.02861	-2.70703	0.00678877	0.0158649
WBGene00004926	snt-6	78.5318	-2.78313	0.46894	-5.93494	2.93955e-09	1.87249e-08
WBGene00019649	exc-14	84.9069	-2.78278	0.432586	-6.43289	1.25203e-10	9.26706e-10
WBGene00021439	ckr-2	135.029	-2.78074	0.459926	-6.04606	1.48432e-09	9.80292e-09
WBGene00017842	nep-12	630.604	-2.77711	0.25139	-11.047	2.26604e-28	6.05949e-27
WBGene00006055	ssr-2	45.9243	-2.77679	0.556101	-4.99333	5.93464e-07	2.82632e-06
WBGene00009886	F49E2.2	434.357	-2.77448	0.239154	-11.6012	4.06144e-31	1.23594e-29
WBGene00006925	vit-1	562.507	-2.77389	0.879809	-3.15283	0.00161696	0.00436843
WBGene00008607	F09B12.3	1110.95	-2.77091	0.212731	-13.0254	8.77606e-39	3.7389e-37
WBGene00010621	egg-6	1339.66	-2.76964	0.204779	-13.525	1.11331e-41	5.34049e-40
WBGene00002272	lec-9	185.848	-2.76814	0.436688	-6.33894	2.31348e-10	1.66815e-09
WBGene00020702	T22F7.3	246.044	-2.76777	0.308545	-8.9704	2.95437e-19	4.43086e-18
WBGene00000687	col-113	370.918	-2.76496	0.369162	-7.48983	6.89635e-14	6.85164e-13
WBGene00019272	H42K12.3	4096.21	-2.76467	0.223752	-12.3559	4.52433e-35	1.65296e-33
WBGene00015408	C03H5.6	115.409	-2.76444	0.404466	-6.8348	8.2118e-12	6.82579e-11
WBGene00007474	C08H9.15	270	-2.76171	0.334305	-8.26105	1.44392e-16	1.78614e-15
WBGene00012387	Y6B3B.1	233.435	-2.76157	0.310501	-8.89393	5.89847e-19	8.69074e-18
WBGene00219780	B0228.10	56.0837	-2.75957	0.551213	-5.00636	5.54704e-07	2.65582e-06
WBGene00008528	F02E9.1	37.0658	-2.75923	0.680525	-4.05456	5.02295e-05	0.000179393
WBGene00014248	ZK1307.7	34.2909	-2.75881	0.645947	-4.27096	1.94638e-05	7.44659e-05
WBGene00000477	cft-1	59.6036	-2.75866	0.612275	-4.5056	6.61868e-06	2.74987e-05
WBGene00013081	txt-14	73.2513	-2.75685	0.462059	-5.96644	2.42486e-09	1.56286e-08
WBGene00008692	scav-4	106.806	-2.75453	0.523028	-5.2665	1.39047e-07	7.18858e-07
WBGene00001553	gcy-33	95.268	-2.746	0.489113	-5.61424	1.97425e-08	1.12886e-07
WBGene00021444	ttc-7	387.133	-2.74517	0.238021	-11.5333	8.9644e-31	2.68249e-29
WBGene00013830	ZC15.1	113.463	-2.74293	0.440065	-6.23301	4.57547e-10	3.20003e-09
WBGene00014826	R13H4.2	145.544	-2.74216	0.406239	-6.7501	1.47742e-11	1.20182e-10
WBGene00003519	nac-3	412.265	-2.74191	0.237155	-11.5617	6.44237e-31	1.93703e-29
WBGene00009691	F44E5.4	419.439	-2.73995	0.338622	-8.09149	5.89406e-16	7.03481e-15
WBGene00020732	T23E7.2	4992.8	-2.73694	0.242156	-11.3024	1.27714e-29	3.60699e-28
WBGene00006787	unc-52	37972.7	-2.73623	0.187506	-14.5928	3.12201e-48	1.85082e-46
WBGene00006819	unc-87	1246.91	-2.73546	0.229915	-11.8977	1.21669e-32	3.96149e-31
WBGene00002393	lpr-1	152.865	-2.73372	0.459721	-5.94648	2.73963e-09	1.7506e-08
WBGene00000750	col-177	78.2634	-2.73302	0.525112	-5.20465	1.94363e-07	9.82999e-07
WBGene00007685	C18E9.5	201.524	-2.73211	0.315387	-8.66273	4.60599e-18	6.36833e-17
WBGene00001441	fkh-9	1988.29	-2.72898	0.248185	-10.9958	4.00541e-28	1.05756e-26
WBGene00001136	eat-5	77.5952	-2.72805	0.610172	-4.47096	7.78708e-06	3.18892e-05
WBGene00018952	F56C9.8	1753.97	-2.72655	0.267771	-10.1824	2.37649e-24	5.05377e-23
WBGene00007099	trx-2	46.4095	-2.72491	0.588387	-4.63116	3.63621e-06	1.56292e-05
WBGene00020260	T05E7.4	69.7536	-2.71903	0.567888	-4.78796	1.68485e-06	7.58151e-06
WBGene00016625	aff-1	253.09	-2.71823	0.266468	-10.2009	1.96343e-24	4.18953e-23
WBGene00009259	hpo-34	4825.9	-2.71314	0.177065	-15.3229	5.37736e-53	3.81823e-51
WBGene00007746	C26D10.6	122.145	-2.71264	0.348191	-7.79066	6.66588e-15	7.36823e-14
WBGene00004135	pqn-48	130.669	-2.71217	0.376456	-7.20448	5.82662e-13	5.38844e-12
WBGene00015218	B0507.1	1177	-2.71096	0.185624	-14.6046	2.62615e-48	1.57169e-46
WBGene00003943	pbo-4	265.876	-2.70946	0.396038	-6.8414	7.84213e-12	6.54014e-11
WBGene00197374	K04H4.11	17.3957	-2.70708	0.846496	-3.19798	0.00138395	0.00380102
WBGene00004890	smp-2	512.23	-2.70675	0.277892	-9.7403	2.02954e-22	3.76768e-21
WBGene00002243	lad-2	641.316	-2.70631	0.284577	-9.50993	1.9079e-21	3.32113e-20
WBGene00001694	grd-5	232.089	-2.70375	0.43686	-6.18905	6.05291e-10	4.17296e-09
WBGene00022518	zfh-2	9479.07	-2.69788	0.175496	-15.3729	2.4883e-53	1.77687e-51
WBGene00012149	VF13D12L.3	153.856	-2.69619	0.388248	-6.94451	3.79787e-12	3.26036e-11
WBGene00004992	spp-7	261.078	-2.69504	0.372063	-7.24351	4.37203e-13	4.0702e-12
WBGene00019018	abts-3	670.671	-2.69436	0.248084	-10.8607	1.7744e-27	4.53266e-26
WBGene00000381	cct-6	1802.78	-2.69014	0.180112	-14.9359	1.925e-50	1.27334e-48
WBGene00005724	srv-13	74.1351	-2.68706	0.662985	-4.05297	5.0571e-05	0.000180562
WBGene00018468	cla-1	20177.7	-2.68517	0.161155	-16.6621	2.47334e-62	2.25253e-60
WBGene00001613	glr-2	88.3281	-2.68458	0.529453	-5.07048	3.9682e-07	1.93453e-06
WBGene00015035	otpl-1	52.8635	-2.68443	0.531157	-5.05393	4.32808e-07	2.10183e-06
WBGene00001020	dnj-2	272.464	-2.6823	0.265676	-10.0961	5.74588e-24	1.17421e-22
WBGene00011041	R05H5.7	99.3411	-2.68174	0.415122	-6.46012	1.0462e-10	7.81728e-10
WBGene00013895	ZC434.9	205.001	-2.68097	0.401584	-6.67598	2.45579e-11	1.94836e-10
WBGene00012853	Y44A6D.2	142.894	-2.6798	0.361103	-7.42117	1.16089e-13	1.13101e-12
WBGene00012763	atln-2	73.512	-2.67817	0.43535	-6.15177	7.66231e-10	5.21668e-09
WBGene00010258	F58E6.11	807.438	-2.67602	0.255431	-10.4765	1.1081e-25	2.50029e-24
WBGene00007549	spin-1	174.912	-2.6727	0.340443	-7.85065	4.13902e-15	4.65288e-14
WBGene00006668	twk-13	385.389	-2.66878	0.293607	-9.08964	9.9364e-20	1.53794e-18
WBGene00001988	hot-3	35.2315	-2.66832	0.718168	-3.71545	0.00020284	0.000654841
WBGene00011454	lron-14	88.1562	-2.66765	0.574263	-4.64534	3.39513e-06	1.46632e-05
WBGene00020128	R193.2	1647.76	-2.66665	0.240947	-11.0674	1.80634e-28	4.86127e-27
WBGene00044743	crb-3	129.256	-2.66633	0.379106	-7.03318	2.01872e-12	1.77297e-11
WBGene00000778	cpn-2	358.884	-2.66582	0.327475	-8.14054	3.93512e-16	4.74632e-15
WBGene00021692	Y48G8AL.15	35.9022	-2.66569	0.722705	-3.68849	0.000225589	0.000722343
WBGene00017262	F08F3.4	137.527	-2.6633	0.404996	-6.5761	4.82954e-11	3.71922e-10
WBGene00017306	F09F9.1	95.7443	-2.66295	0.404165	-6.58878	4.4344e-11	3.42964e-10
WBGene00010350	H01G02.3	124.407	-2.65937	0.34933	-7.61277	2.68292e-14	2.78439e-13
WBGene00015546	C06G1.2	364.013	-2.65912	0.351817	-7.55824	4.08562e-14	4.14097e-13
WBGene00002976	lev-9	184.686	-2.6588	0.463086	-5.74148	9.38515e-09	5.61411e-08
WBGene00008932	F18A11.5	145.923	-2.65854	0.373545	-7.11705	1.10262e-12	9.9125e-12
WBGene00006541	tbh-1	84.6956	-2.6579	0.671016	-3.96102	7.46311e-05	0.000258606
WBGene00022515	ttr-48	749.694	-2.65632	0.257829	-10.3026	6.8576e-25	1.48597e-23
WBGene00000233	avr-15	88.5287	-2.65609	0.617676	-4.30014	1.70692e-05	6.59696e-05
WBGene00003106	mab-9	96.7748	-2.65299	0.589973	-4.49679	6.89868e-06	2.85394e-05
WBGene00021928	Y55F3AM.11	58.2288	-2.65208	0.751474	-3.52916	0.000416874	0.00127321
WBGene00006749	unc-9	670.026	-2.64666	0.233239	-11.3474	7.63858e-30	2.17198e-28
WBGene00010045	F54C9.11	193.404	-2.64557	0.291131	-9.08719	1.01627e-19	1.57103e-18
WBGene00004912	sng-1	225.072	-2.64413	0.293412	-9.01167	2.02943e-19	3.0693e-18
WBGene00015632	C09D4.1	314.967	-2.64247	0.280988	-9.40421	5.24232e-21	8.83184e-20
WBGene00019230	ttll-11	50.7318	-2.63909	0.507283	-5.20241	1.96718e-07	9.93708e-07
WBGene00005025	sqv-7	244.958	-2.63636	0.294793	-8.9431	3.78401e-19	5.62145e-18
WBGene00006766	unc-30	125.709	-2.63358	0.422372	-6.23522	4.51148e-10	3.15879e-09
WBGene00003936	pat-12	8725.56	-2.6334	0.178296	-14.7698	2.29377e-49	1.44865e-47
WBGene00004256	pxn-1	391.551	-2.63323	0.24125	-10.9149	9.77948e-28	2.52898e-26
WBGene00002257	lbp-5	145.841	-2.63189	0.3825	-6.88076	5.95333e-12	5.02157e-11
WBGene00011949	T23F6.1	27.9083	-2.63128	0.815134	-3.22804	0.00124643	0.00345427
WBGene00010850	M04C3.1	492.533	-2.63074	0.2394	-10.9889	4.3225e-28	1.13651e-26
WBGene00009692	F44E5.5	391.56	-2.63015	0.29392	-8.94851	3.603e-19	5.36522e-18
WBGene00018675	F52C9.5	153.604	-2.62864	0.344845	-7.62268	2.48455e-14	2.58706e-13
WBGene00020308	T07D3.5	21.1115	-2.62822	0.805706	-3.26202	0.00110623	0.00309715
WBGene00004017	phg-1	547.316	-2.6213	0.230174	-11.3883	4.78052e-30	1.37802e-28
WBGene00017036	D1069.1	39.5989	-2.61751	0.672803	-3.89046	0.000100055	0.000340324
WBGene00011004	R04B5.6	109.712	-2.6118	0.365975	-7.13654	9.57127e-13	8.6728e-12
WBGene00001490	frm-3	2007.4	-2.60976	0.183361	-14.2329	5.72205e-46	3.12673e-44
WBGene00007664	seb-3	199.656	-2.60873	0.473063	-5.51455	3.49668e-08	1.94366e-07
WBGene00019001	ipgm-1	562.488	-2.60622	0.247683	-10.5224	6.81096e-26	1.57934e-24
WBGene00020478	T13C2.2	263.74	-2.60563	0.279359	-9.32719	1.08719e-20	1.79787e-19
WBGene00009541	cutl-17	268.818	-2.60147	0.433025	-6.00767	1.88208e-09	1.22369e-08
WBGene00013539	Y73F8A.35	34.796	-2.60061	0.716947	-3.62733	0.000286365	0.000901789
WBGene00007325	C05C9.1	216.552	-2.60058	0.306607	-8.48182	2.21706e-17	2.9025e-16
WBGene00002266	lec-3	1858.43	-2.59993	0.247775	-10.4931	9.29269e-26	2.11577e-24
WBGene00017945	F31D5.2	123.993	-2.59972	0.393783	-6.6019	4.0592e-11	3.14914e-10
WBGene00020846	T27A10.6	4361.09	-2.5996	0.197527	-13.1608	1.47574e-39	6.55374e-38
WBGene00004124	pqn-37	33.8561	-2.59617	0.67553	-3.84316	0.000121459	0.000406522
WBGene00016297	fbxc-15	24.1217	-2.59417	0.792206	-3.27462	0.00105804	0.00297481
WBGene00001070	dpy-8	37.0371	-2.59316	0.648472	-3.99887	6.36453e-05	0.000223372
WBGene00002258	lbp-6	339.605	-2.58915	0.317751	-8.14836	3.68896e-16	4.45796e-15
WBGene00020971	W03B1.1	68.0159	-2.58809	0.586529	-4.41255	1.0216e-05	4.09684e-05
WBGene00019227	sgca-1	317.007	-2.58613	0.273439	-9.4578	3.14494e-21	5.37032e-20
WBGene00020294	T06F4.1	127.377	-2.58418	0.428008	-6.03769	1.56337e-09	1.02871e-08
WBGene00021983	npr-5	169.005	-2.58386	0.349489	-7.39326	1.43274e-13	1.38088e-12
WBGene00018487	F46C8.8	397.361	-2.58097	0.260007	-9.92655	3.191e-23	6.2468e-22
WBGene00011587	anp-1	406.33	-2.57963	0.262825	-9.815	9.70349e-23	1.83677e-21
WBGene00001619	glr-8	30.3625	-2.57848	0.747209	-3.45082	0.000558896	0.00166846
WBGene00011073	R07A4.2	25.1188	-2.57244	0.755955	-3.4029	0.000666749	0.0019565
WBGene00200129	F49E10.20	16.1422	-2.56983	0.896359	-2.86696	0.00414434	0.010219
WBGene00016289	lntl-1	674.306	-2.56969	0.210118	-12.2298	2.15509e-34	7.52365e-33
WBGene00001644	gly-19	101.557	-2.56931	0.384738	-6.67807	2.42115e-11	1.92588e-10
WBGene00002992	lin-3	93.8456	-2.56335	0.42032	-6.09857	1.07022e-09	7.15454e-09
WBGene00001059	dpf-6	148.596	-2.56282	0.417219	-6.14262	8.11703e-10	5.49057e-09
WBGene00019489	K07E1.1	32.8529	-2.56257	0.863173	-2.96878	0.00298987	0.00761802
WBGene00018582	F48A9.2	87.9755	-2.56011	0.409425	-6.25293	4.02832e-10	2.83471e-09
WBGene00001753	gst-5	198.392	-2.55998	0.394912	-6.4824	9.02776e-11	6.77379e-10
WBGene00019144	H01M10.2	46.4745	-2.55965	0.725416	-3.52853	0.000417873	0.00127564
WBGene00000902	daf-6	472.72	-2.55803	0.246406	-10.3814	3.01433e-25	6.6231e-24
WBGene00010948	M195.2	682.757	-2.55649	0.287352	-8.89672	5.7523e-19	8.48532e-18
WBGene00021279	Y23H5B.8	242.071	-2.55648	0.290631	-8.79631	1.41395e-18	2.03324e-17
WBGene00010175	F56H11.2	93.5677	-2.55516	0.504354	-5.0662	4.05844e-07	1.97623e-06
WBGene00020808	clik-1	9934.61	-2.55021	0.201316	-12.6677	8.9253e-37	3.49449e-35
WBGene00009008	F21D5.3	189.623	-2.54982	0.32792	-7.77572	7.50191e-15	8.22722e-14
WBGene00022287	Y75B7AR.1	88.4947	-2.54872	0.487073	-5.23272	1.67036e-07	8.5303e-07
WBGene00022845	ZK1055.4	90.5598	-2.54721	0.476964	-5.34047	9.27062e-08	4.89963e-07
WBGene00002056	ifc-2	1476.81	-2.5468	0.267628	-9.51619	1.79637e-21	3.13132e-20
WBGene00003404	mpz-1	3097.45	-2.54465	0.186389	-13.6524	1.95361e-42	9.82118e-41
WBGene00007336	C05C12.4	90.9059	-2.54396	0.446088	-5.70283	1.17836e-08	6.95941e-08
WBGene00007799	nrx-1	1344.21	-2.54335	0.194396	-13.0833	4.10066e-39	1.77714e-37
WBGene00009532	ccch-1	2754.19	-2.54202	0.214267	-11.8638	1.82417e-32	5.87851e-31
WBGene00010646	K08C7.1	37.7278	-2.5372	0.614313	-4.13015	3.62533e-05	0.000132605
WBGene00015713	C12D12.1	1292.21	-2.53358	0.229163	-11.0558	2.05481e-28	5.51813e-27
WBGene00007776	dmd-4	48.4077	-2.53172	0.599076	-4.22605	2.37834e-05	8.96281e-05
WBGene00012304	cutl-4	28.1464	-2.52776	0.780401	-3.23905	0.00119927	0.00333091
WBGene00020678	T22B11.4	1386.55	-2.52644	0.201117	-12.562	3.41575e-36	1.29695e-34
WBGene00009730	myo-6	610.747	-2.5234	0.221786	-11.3776	5.4053e-30	1.551e-28
WBGene00008603	F09B9.4	340.171	-2.52269	0.271833	-9.28029	1.69018e-20	2.74802e-19
WBGene00003534	nas-15	281.809	-2.52251	0.328164	-7.68674	1.50933e-14	1.60756e-13
WBGene00044144	M153.4	61.3822	-2.52062	0.579805	-4.34735	1.37791e-05	5.41342e-05
WBGene00003166	mec-2	475.353	-2.51911	0.270616	-9.30881	1.29268e-20	2.12093e-19
WBGene00017858	F27C1.11	70.3186	-2.51512	1.2893	-1.95077	0.0510847	0.0932374
WBGene00000502	chp-1	694.525	-2.51468	0.201638	-12.4712	1.07166e-35	4.04462e-34
WBGene00016806	C50D2.2	143.291	-2.51317	0.370142	-6.78975	1.12328e-11	9.24518e-11
WBGene00009547	F38H4.3	104.385	-2.51262	0.369803	-6.79449	1.08697e-11	8.96391e-11
WBGene00044469	clec-173	27.5495	-2.51202	0.82949	-3.02839	0.00245859	0.00638554
WBGene00000685	col-111	178.928	-2.5107	0.344672	-7.28433	3.23277e-13	3.03205e-12
WBGene00022497	Y119D3B.21	378.065	-2.51053	0.271069	-9.26156	2.01461e-20	3.24611e-19
WBGene00000634	col-58	112.375	-2.51043	1.18213	-2.12365	0.0336994	0.065019
WBGene00014039	ZK662.2	161.656	-2.50985	0.361627	-6.94043	3.90899e-12	3.34889e-11
WBGene00013713	Y106G6G.4	65.5457	-2.50945	0.480947	-5.21773	1.81125e-07	9.20494e-07
WBGene00001795	gtl-1	669.596	-2.50878	0.241127	-10.4044	2.36754e-25	5.2294e-24
WBGene00044150	VB0395L.1	37.0007	-2.50671	0.635875	-3.94214	8.07571e-05	0.000278451
WBGene00020340	T08B1.1	278.002	-2.5067	0.263379	-9.51744	1.77503e-21	3.10204e-20
WBGene00001543	gcy-18	93.687	-2.50445	0.402462	-6.22284	4.88229e-10	3.40137e-09
WBGene00000397	cdh-5	3011.73	-2.50425	0.156638	-15.9875	1.56284e-57	1.25909e-55
WBGene00016324	C32E8.6	29.0284	-2.50199	0.693392	-3.60833	0.000308177	0.000964914
WBGene00021322	Y34B4A.6	475.657	-2.50102	0.256803	-9.73907	2.05422e-22	3.80227e-21
WBGene00016938	C54H2.4	35.1578	-2.501	0.788732	-3.17091	0.00151963	0.00413571
WBGene00016863	cest-35.2	94.7988	-2.50083	0.384637	-6.50181	7.93615e-11	6.00853e-10
WBGene00006464	bath-47	72.6555	-2.49983	0.689228	-3.62701	0.000286725	0.000902469
WBGene00006831	unc-104	2098.12	-2.49882	0.185129	-13.4977	1.61291e-41	7.56381e-40
WBGene00014030	glb-1	47.1376	-2.48983	0.568361	-4.38071	1.18293e-05	4.68846e-05
WBGene00001593	glc-3	37.9153	-2.48836	0.603773	-4.12135	3.76656e-05	0.000137451
WBGene00020766	T24C12.4	63.9023	-2.48828	0.598758	-4.15574	3.24241e-05	0.000119328
WBGene00022240	shl-1	131.216	-2.48789	0.401231	-6.20063	5.62362e-10	3.89408e-09
WBGene00007242	madf-5	502.202	-2.48403	0.293526	-8.46272	2.61202e-17	3.40538e-16
WBGene00017831	F26F4.12	52.4937	-2.48246	0.555641	-4.46774	7.90512e-06	3.23621e-05
WBGene00004944	sol-1	99.2334	-2.47842	0.431969	-5.73749	9.60907e-09	5.73442e-08
WBGene00045237	mrt-1	32.9495	-2.47697	0.781796	-3.16831	0.00153326	0.00416918
WBGene00086557	K07A12.8	14.1322	-2.47395	0.97343	-2.54148	0.0110386	0.0244076
WBGene00004122	pqn-35	519.984	-2.47382	0.254279	-9.72876	2.27341e-22	4.18333e-21
WBGene00044736	gfrp-1	66.4418	-2.47345	0.495036	-4.99651	5.83766e-07	2.78647e-06
WBGene00012478	mxt-1	1331.81	-2.47181	0.209519	-11.7975	4.01935e-32	1.28211e-30
WBGene00016260	rege-1	444.741	-2.46998	0.251249	-9.83082	8.29401e-23	1.58418e-21
WBGene00012940	Y47D3B.3	43.0732	-2.46851	0.583332	-4.23174	2.31894e-05	8.75999e-05
WBGene00004796	sid-2	49.2174	-2.46756	0.557598	-4.42533	9.62938e-06	3.87271e-05
WBGene00003847	blmp-1	2376.59	-2.46748	0.167888	-14.6972	6.72062e-49	4.10023e-47
WBGene00020487	T13C5.7	53.0476	-2.46727	0.570771	-4.3227	1.54132e-05	5.99358e-05
WBGene00006683	twk-31	1356.9	-2.46363	0.192273	-12.8132	1.38376e-37	5.59198e-36
WBGene00017576	cdh-8	1632.87	-2.46241	0.17234	-14.2881	2.59606e-46	1.43102e-44
WBGene00010269	F58G1.7	183.773	-2.46064	0.325348	-7.56311	3.9353e-14	4.00152e-13
WBGene00010907	M88.4	52.274	-2.45619	0.577153	-4.25571	2.08387e-05	7.93158e-05
WBGene00022635	ZC581.9	103.102	-2.45404	0.574359	-4.27266	1.93152e-05	7.39649e-05
WBGene00017374	ttr-41	575.943	-2.45383	0.326486	-7.51589	5.65235e-14	5.65998e-13
WBGene00044553	T23B12.11	60.5057	-2.45297	0.525805	-4.66517	3.08367e-06	1.34102e-05
WBGene00019565	cyp-35A3	459.218	-2.45257	0.229314	-10.6953	1.07095e-26	2.60343e-25
WBGene00008132	gale-1	1280.22	-2.44756	0.241589	-10.1311	4.0203e-24	8.33781e-23
WBGene00020330	cest-16	428.934	-2.44463	0.313398	-7.80041	6.17059e-15	6.84483e-14
WBGene00021325	Y34B4A.9	521.693	-2.44102	0.336654	-7.25083	4.14231e-13	3.85919e-12
WBGene00020360	math-41	465.791	-2.44061	0.341105	-7.155	8.36699e-13	7.63108e-12
WBGene00002055	ifc-1	147.364	-2.43886	0.399094	-6.11099	9.90169e-10	6.65748e-09
WBGene00003173	mec-9	88.6523	-2.43828	0.570758	-4.272	1.93724e-05	7.41615e-05
WBGene00012891	sorb-1	2807.98	-2.43802	0.2626	-9.28417	1.62967e-20	2.65307e-19
WBGene00018418	F44E2.4	9342.47	-2.43644	0.154467	-15.7733	4.75289e-56	3.75687e-54
WBGene00011665	T09F5.1	176.922	-2.43445	0.35657	-6.82741	8.64631e-12	7.17272e-11
WBGene00003773	nlt-1	129.262	-2.43285	0.377422	-6.44598	1.14853e-10	8.55136e-10
WBGene00011879	pho-7	35.4426	-2.43267	0.632465	-3.84633	0.000119899	0.000402159
WBGene00008449	E01G6.1	1189.32	-2.43267	0.282857	-8.60035	7.94724e-18	1.06939e-16
WBGene00004169	pqn-89	2458.34	-2.42597	0.20118	-12.0587	1.74502e-33	5.84836e-32
WBGene00001053	dop-2	66.1435	-2.42489	0.552124	-4.39192	1.12353e-05	4.47294e-05
WBGene00022661	ZK112.5	19.2904	-2.421	0.848545	-2.85312	0.00432928	0.0106286
WBGene00003369	mlc-1	2763.86	-2.42094	0.191835	-12.6199	1.64052e-36	6.34401e-35
WBGene00010540	K03H1.5	591.749	-2.42056	0.251645	-9.61891	6.65301e-22	1.1894e-20
WBGene00012704	mlt-3	122.581	-2.42031	0.416195	-5.81531	6.052e-09	3.71757e-08
WBGene00007073	ugt-2	34.794	-2.41938	0.709519	-3.40988	0.00064991	0.00191066
WBGene00012291	W06A7.2	95.418	-2.41775	0.443646	-5.44972	5.04485e-08	2.74712e-07
WBGene00012391	Y6B3B.7	72.2011	-2.4172	0.590776	-4.09156	4.28474e-05	0.000154877
WBGene00016580	ppm-1.H	99.544	-2.41666	0.634146	-3.81088	0.000138472	0.000459429
WBGene00012225	W03G11.3	263.068	-2.4131	0.270564	-8.91878	4.71458e-19	6.99561e-18
WBGene00021167	cyp-32B1	133.039	-2.408	0.367812	-6.54684	5.87686e-11	4.48999e-10
WBGene00021909	Y55B1BL.1	631.277	-2.40793	0.294688	-8.1711	3.05578e-16	3.71063e-15
WBGene00010972	R01H10.4	113.051	-2.40706	0.36338	-6.62409	3.49393e-11	2.73083e-10
WBGene00013642	daf-38	72.3798	-2.4069	0.482263	-4.99085	6.0115e-07	2.86076e-06
WBGene00000089	aex-6	88.1766	-2.40561	0.413004	-5.82468	5.72223e-09	3.52535e-08
WBGene00002054	ifb-2	4336.15	-2.40467	0.180633	-13.3124	1.95985e-40	8.92443e-39
WBGene00009257	F29G6.1	85.8866	-2.40426	0.574583	-4.18435	2.85981e-05	0.000106306
WBGene00003959	pcp-4	44.0482	-2.39965	0.590554	-4.06339	4.83655e-05	0.000173179
WBGene00006784	unc-49	1062.67	-2.3963	0.211753	-11.3165	1.0872e-29	3.07747e-28
WBGene00044394	B0034.7	110.347	-2.39483	0.406944	-5.88491	3.98276e-09	2.49777e-08
WBGene00077784	F35C8.9	30.3729	-2.39474	0.779612	-3.07171	0.00212838	0.00560668
WBGene00016250	hsp-110	4496.49	-2.3926	0.1618	-14.7874	1.76654e-49	1.127e-47
WBGene00013574	lron-13	277.186	-2.39115	0.368863	-6.48249	9.02211e-11	6.77359e-10
WBGene00009796	F46G10.1	248.472	-2.39089	0.297941	-8.02471	1.01769e-15	1.1887e-14
WBGene00000879	cyn-3	1302.36	-2.38921	0.208694	-11.4484	2.39533e-30	7.00104e-29
WBGene00008964	mltn-9	1243.59	-2.38793	0.244524	-9.76564	1.58104e-22	2.95692e-21
WBGene00007691	cest-8	119.89	-2.3862	0.423798	-5.6305	1.79687e-08	1.03213e-07
WBGene00010111	F55D12.2	892.647	-2.38593	0.192787	-12.376	3.52529e-35	1.29172e-33
WBGene00020256	T05C3.6	129.984	-2.38485	0.42411	-5.62318	1.8747e-08	1.07488e-07
WBGene00021248	Y22D7AL.10	275.158	-2.37711	0.398257	-5.96878	2.39033e-09	1.54139e-08
WBGene00021446	hlh-33	86.1974	-2.37513	0.421439	-5.63576	1.74283e-08	1.00338e-07
WBGene00008194	C49C3.4	1930.58	-2.37292	0.198271	-11.9681	5.22029e-33	1.72201e-31
WBGene00006789	unc-54	55365.5	-2.37168	0.18429	-12.8693	6.69989e-38	2.75177e-36
WBGene00001791	gst-43	34.1491	-2.37141	0.711219	-3.33429	0.000855184	0.0024494
WBGene00007001	tufm-2	234.148	-2.37132	0.346868	-6.83637	8.12248e-12	6.76945e-11
WBGene00017250	F08D12.7	53.0131	-2.36974	0.569688	-4.15971	3.18654e-05	0.000117444
WBGene00021008	W03F11.5	73.0735	-2.36924	1.29308	-1.83224	0.0669149	0.117752
WBGene00016450	clec-5	60.277	-2.3672	0.605752	-3.90787	9.31131e-05	0.000318088
WBGene00000584	cog-1	231.162	-2.36654	0.293582	-8.06092	7.57237e-16	8.96135e-15
WBGene00006436	ttn-1	58066.8	-2.36653	0.158421	-14.9382	1.8581e-50	1.24216e-48
WBGene00011222	R10H10.3	95.5828	-2.36286	0.385888	-6.12318	9.17285e-10	6.19143e-09
WBGene00003485	mua-6	1062.94	-2.36233	0.22501	-10.4988	8.7494e-26	1.99932e-24
WBGene00020884	T28B4.1	123.594	-2.36057	0.56128	-4.20569	2.60289e-05	9.73026e-05
WBGene00013492	Y70C5C.1	85.2096	-2.35921	0.658666	-3.58179	0.000341242	0.00106078
WBGene00010110	F55D12.1	112.698	-2.35849	0.395759	-5.95941	2.5315e-09	1.62575e-08
WBGene00004146	pqn-63	120.835	-2.35572	0.517869	-4.54887	5.39345e-06	2.26705e-05
WBGene00010769	asah-1	135.355	-2.34878	0.474707	-4.94785	7.50367e-07	3.52414e-06
WBGene00016264	C30F12.5	290.091	-2.3481	0.282804	-8.30295	1.01555e-16	1.27125e-15
WBGene00019428	dgk-5	176.562	-2.34636	0.356526	-6.58119	4.66696e-11	3.60506e-10
WBGene00044418	C08G5.7	121.731	-2.34435	1.14071	-2.05517	0.0398624	0.0753596
WBGene00020992	W03F8.2	34.8972	-2.3427	0.858509	-2.7288	0.00635659	0.0149634
WBGene00017067	not found	78.5338	-2.34206	0.45958	-5.09609	3.46734e-07	1.69827e-06
WBGene00004154	pqn-72	234.247	-2.34158	0.377951	-6.19545	5.81201e-10	4.0179e-09
WBGene00007903	lgc-21	562.629	-2.33726	0.314115	-7.44077	1.00097e-13	9.82827e-13
WBGene00003861	oig-3	76.5883	-2.33658	0.41661	-5.60857	2.04004e-08	1.16383e-07
WBGene00014848	VM106R.1	133.786	-2.33571	0.437288	-5.34134	9.22601e-08	4.8781e-07
WBGene00044620	bus-4	208.083	-2.33466	0.321203	-7.26848	3.63546e-13	3.40465e-12
WBGene00016721	C46G7.1	137.531	-2.33381	0.404779	-5.76565	8.13449e-09	4.91984e-08
WBGene00008462	E02H4.4	112.461	-2.33223	0.356099	-6.54939	5.77737e-11	4.41666e-10
WBGene00044107	F58G6.9	48.4765	-2.33126	0.736564	-3.16504	0.00155062	0.00421276
WBGene00009543	F38E11.6	44.0189	-2.32895	0.559618	-4.16168	3.15914e-05	0.000116571
WBGene00000666	col-91	33.6862	-2.32881	0.769181	-3.02765	0.00246462	0.00639987
WBGene00020143	T01C8.2	28.047	-2.32656	0.779134	-2.98609	0.00282571	0.00723733
WBGene00014300	D2023.1	369.232	-2.32597	0.307404	-7.56648	3.83467e-14	3.90235e-13
WBGene00021526	Y41G9A.2	42.9991	-2.32579	0.534866	-4.34836	1.37157e-05	5.39021e-05
WBGene00021597	spsb-1	1536.47	-2.32434	0.235042	-9.88906	4.64354e-23	9.0201e-22
WBGene00001410	feh-1	1305.29	-2.32355	0.194943	-11.9192	9.40598e-33	3.08654e-31
WBGene00014253	ZK1320.3	93.4303	-2.32342	0.633443	-3.66792	0.000244533	0.00077726
WBGene00019155	H04M03.11	19.6685	-2.3225	0.783815	-2.96308	0.0030458	0.00773951
WBGene00006614	trp-1	103.584	-2.32183	0.405707	-5.72293	1.04703e-08	6.2218e-08
WBGene00016442	C35D10.5	50.2218	-2.32125	0.52231	-4.44419	8.82224e-06	3.5721e-05
WBGene00002052	ifa-4	566.226	-2.32045	0.230449	-10.0693	7.55447e-24	1.53632e-22
WBGene00007170	B0393.5	3920.98	-2.31955	0.17294	-13.4124	5.11219e-41	2.34489e-39
WBGene00000232	avr-14	133.132	-2.31637	0.404634	-5.72461	1.03674e-08	6.16649e-08
WBGene00021496	daf-42	202.055	-2.3134	0.37087	-6.23775	4.43908e-10	3.1133e-09
WBGene00021814	mfsd-8	55.4008	-2.31174	0.504084	-4.58603	4.51751e-06	1.91811e-05
WBGene00001147	eat-18	14.9295	-2.31109	0.905477	-2.55234	0.0107001	0.0237259
WBGene00016112	C25H3.3	32.5705	-2.30848	0.686551	-3.36244	0.00077258	0.0022327
WBGene00017881	asp-13	52.7222	-2.30819	0.572806	-4.02963	5.5865e-05	0.000198224
WBGene00019481	cogc-6	768.409	-2.30806	0.195885	-11.7827	4.79346e-32	1.52517e-30
WBGene00020368	ast-1	323.948	-2.30768	0.298382	-7.73398	1.04235e-14	1.12642e-13
WBGene00013884	ZC412.3	124.214	-2.30627	0.529657	-4.35427	1.33511e-05	5.25513e-05
WBGene00022767	ZK563.2	62.7089	-2.30489	0.49002	-4.70367	2.5553e-06	1.12134e-05
WBGene00044564	ZK813.6	132.24	-2.30308	0.393575	-5.85169	4.86588e-09	3.01848e-08
WBGene00008484	E04D5.5	34.9298	-2.30063	0.600029	-3.83419	0.000125976	0.000420523
WBGene00020590	T19H12.6	213.569	-2.29767	0.36114	-6.36226	1.98804e-10	1.44593e-09
WBGene00013711	Y106G6G.2	482.47	-2.2976	0.236185	-9.72796	2.29153e-22	4.21051e-21
WBGene00018343	F42A10.7	41.2539	-2.29707	0.681995	-3.36817	0.000756697	0.00219128
WBGene00016354	rig-6	2688.47	-2.29597	0.159114	-14.4297	3.36534e-47	1.91383e-45
WBGene00022154	drag-1	186.087	-2.29409	0.398327	-5.7593	8.44629e-09	5.0986e-08
WBGene00015622	C09B8.3	67.5248	-2.29275	0.472182	-4.85565	1.19993e-06	5.4979e-06
WBGene00000529	clh-2	82.5291	-2.29246	0.4722	-4.85485	1.20478e-06	5.51278e-06
WBGene00009186	trcs-1	97.459	-2.29095	0.677551	-3.38123	0.00072163	0.0021033
WBGene00010524	K03B8.6	588.292	-2.28741	0.20916	-10.9361	7.74352e-28	2.0191e-26
WBGene00015131	B0303.11	168.337	-2.2849	0.52592	-4.34458	1.39542e-05	5.47709e-05
WBGene00006487	zipt-17	116.228	-2.28402	0.461701	-4.94696	7.53796e-07	3.53893e-06
WBGene00009340	best-14	1009.32	-2.28357	0.256864	-8.89022	6.09908e-19	8.95481e-18
WBGene00006772	unc-36	1011.93	-2.28074	0.1904	-11.9787	4.596e-33	1.52007e-31
WBGene00006693	twk-43	164.845	-2.27974	0.336882	-6.76718	1.31317e-11	1.07238e-10
WBGene00021124	W10C4.1	308.983	-2.27929	0.353485	-6.44805	1.13297e-10	8.44054e-10
WBGene00017792	F25E5.16	16.3866	-2.27486	0.904515	-2.51501	0.0119029	0.0261621
WBGene00016769	C49C8.5	145.199	-2.27404	0.381147	-5.96631	2.42685e-09	1.56333e-08
WBGene00000975	dhs-12	72.8676	-2.27212	0.632776	-3.59071	0.00032978	0.00102948
WBGene00206525	R74.10	42.9703	-2.27181	0.599861	-3.78723	0.000152334	0.000501713
WBGene00007802	cutl-27	109.286	-2.27053	0.387735	-5.85589	4.74474e-09	2.94624e-08
WBGene00001623	glt-5	37.7777	-2.26865	0.719408	-3.1535	0.00161327	0.00435939
WBGene00021264	fbxa-13	22.4179	-2.26842	0.841271	-2.69642	0.00700886	0.0163125
WBGene00002038	hum-5	1936.09	-2.26749	0.167129	-13.5673	6.25709e-42	3.03626e-40
WBGene00015781	C14F11.6	2194.2	-2.26528	0.166999	-13.5646	6.48932e-42	3.13684e-40
WBGene00021503	ctsa-4.2	98.9638	-2.26508	0.642009	-3.52811	0.00041854	0.00127706
WBGene00018115	F36H9.7	25.458	-2.26494	0.730538	-3.10037	0.00193277	0.00514465
WBGene00003532	nas-13	57.0596	-2.26434	0.566861	-3.99453	6.48233e-05	0.000227062
WBGene00004345	rgs-2	112.943	-2.26305	0.410139	-5.51777	3.43325e-08	1.91179e-07
WBGene00044530	F32D1.11	123.253	-2.26046	0.400455	-5.64473	1.65437e-08	9.55961e-08
WBGene00020012	R11G1.6	2269.05	-2.26008	0.168103	-13.4446	3.31071e-41	1.52414e-39
WBGene00002986	lig-4	146.851	-2.25982	0.37047	-6.09988	1.06145e-09	7.0997e-09
WBGene00004231	ptr-17	115.27	-2.25826	0.397355	-5.68322	1.32181e-08	7.75921e-08
WBGene00013849	ZC84.6	1367.91	-2.25588	0.193962	-11.6305	2.88399e-31	8.86211e-30
WBGene00011337	T01G1.2	141.588	-2.25521	0.386785	-5.83065	5.52113e-09	3.40813e-08
WBGene00001450	flp-7	24.2764	-2.25509	0.756301	-2.98173	0.00286621	0.00732612
WBGene00010396	H13N06.2	141.082	-2.25467	0.382199	-5.8992	3.65274e-09	2.29752e-08
WBGene00013077	ttr-24	25.991	-2.25359	0.766227	-2.94115	0.00326997	0.00824247
WBGene00018181	mpdu-1	526.465	-2.25311	0.229558	-9.815	9.70413e-23	1.83677e-21
WBGene00005018	sqt-3	117030	-2.25286	0.201112	-11.202	3.98726e-29	1.09654e-27
WBGene00001620	glt-1	132.444	-2.25248	0.535318	-4.20775	2.5793e-05	9.65642e-05
WBGene00008594	clec-57	36.6078	-2.25221	0.602462	-3.73833	0.000185243	0.000602365
WBGene00017900	F28E10.1	2261.39	-2.24967	0.193711	-11.6135	3.51884e-31	1.07603e-29
WBGene00015157	B0361.3	419.445	-2.24915	0.289079	-7.78042	7.22859e-15	7.94829e-14
WBGene00011287	glb-24	26.0653	-2.24903	0.773481	-2.90767	0.0036413	0.00909638
WBGene00021146	lgc-45	356.326	-2.24833	0.281537	-7.9859	1.39499e-15	1.61886e-14
WBGene00006412	nlg-1	1033.98	-2.24683	0.187546	-11.9801	4.5162e-33	1.49761e-31
WBGene00022179	Y71H2AM.14	59.7496	-2.24538	0.507323	-4.42594	9.6024e-06	3.86433e-05
WBGene00008977	iglr-1	322.355	-2.24295	0.272489	-8.23134	1.85127e-16	2.26993e-15
WBGene00011765	frpr-17	38.9687	-2.24079	0.688108	-3.25645	0.00112816	0.00315503
WBGene00003554	nas-38	91.4119	-2.23172	0.48994	-4.55508	5.23648e-06	2.20624e-05
WBGene00008089	C44C10.9	145.834	-2.23081	0.405813	-5.49712	3.86034e-08	2.13073e-07
WBGene00009654	sly-1	521.612	-2.22925	0.2536	-8.79041	1.49021e-18	2.13072e-17
WBGene00016114	flp-27	133.261	-2.22855	0.433702	-5.13845	2.77019e-07	1.37232e-06
WBGene00004265	qui-1	398.184	-2.22815	0.255368	-8.72524	2.6562e-18	3.72579e-17
WBGene00007817	C30F2.3	19.8322	-2.22776	0.791456	-2.81476	0.00488132	0.0118342
WBGene00003982	pes-9	460.459	-2.22715	0.258809	-8.60539	7.60581e-18	1.02785e-16
WBGene00017621	txt-17	48.2824	-2.22678	0.726343	-3.06575	0.00217127	0.0057077
WBGene00004150	pqn-67	134.181	-2.22468	0.371236	-5.99263	2.06473e-09	1.33829e-08
WBGene00000845	cup-4	231.89	-2.22391	0.281605	-7.89727	2.85076e-15	3.23863e-14
WBGene00000169	aqp-1	58.5122	-2.22341	0.602904	-3.68783	0.000226173	0.00072403
WBGene00008868	F15G9.5	187.49	-2.22142	0.319117	-6.96113	3.37544e-12	2.90366e-11
WBGene00044070	set-18	732	-2.22105	0.209242	-10.6148	2.54444e-26	6.06803e-25
WBGene00007220	C01B9.1	150.892	-2.2198	0.331484	-6.69654	2.13413e-11	1.70948e-10
WBGene00009813	haly-1	909.042	-2.21743	0.219446	-10.1047	5.26705e-24	1.08164e-22
WBGene00018218	F40A3.3	497.552	-2.21635	0.237476	-9.33291	1.03001e-20	1.70555e-19
WBGene00004217	ptr-2	1109.83	-2.21571	0.193704	-11.4386	2.68101e-30	7.81785e-29
WBGene00013037	Y49E10.18	20.2926	-2.21503	0.824887	-2.68525	0.00724754	0.0167933
WBGene00011927	T22C8.6	36.365	-2.21259	0.616483	-3.58905	0.000331885	0.00103553
WBGene00016210	C29F5.1	2576.87	-2.2112	0.22102	-10.0045	1.45614e-23	2.89111e-22
WBGene00009157	F26E4.2	296.335	-2.2095	0.310401	-7.11822	1.0933e-12	9.83583e-12
WBGene00012306	W06F12.2	1931.56	-2.20925	0.197183	-11.2041	3.89417e-29	1.07329e-27
WBGene00003033	lin-48	59.7132	-2.20923	0.698676	-3.16202	0.00156679	0.00424935
WBGene00016823	C50E3.12	21.0162	-2.20693	0.908324	-2.42968	0.0151123	0.0323491
WBGene00020321	T07F12.1	108.883	-2.20655	0.418063	-5.27802	1.30585e-07	6.76782e-07
WBGene00014009	lips-6	189.14	-2.20527	1.04477	-2.11078	0.0347916	0.0668595
WBGene00022505	ZC21.3	296.942	-2.20493	0.359654	-6.1307	8.74908e-10	5.90857e-09
WBGene00011462	vap-2	20.9392	-2.20225	0.829046	-2.65636	0.00789886	0.0181188
WBGene00018221	F40A3.6	173.907	-2.20039	0.335563	-6.55731	5.47857e-11	4.19079e-10
WBGene00201633	F13D11.20	33.088	-2.1999	0.637224	-3.45232	0.000555779	0.00166034
WBGene00009518	clec-166	27.2566	-2.19811	0.708154	-3.104	0.0019092	0.00508905
WBGene00009396	clec-65	63.1165	-2.19633	0.634626	-3.46082	0.000538532	0.00161226
WBGene00011103	R07E3.2	128.207	-2.19605	0.413069	-5.31643	1.05821e-07	5.55336e-07
WBGene00008604	F09B9.5	36.3119	-2.19442	0.607377	-3.61294	0.000302743	0.000948611
WBGene00007054	scpl-1	742.445	-2.19411	0.21717	-10.1032	5.34575e-24	1.09422e-22
WBGene00001986	hot-1	223.458	-2.19356	0.352051	-6.23081	4.6403e-10	3.23996e-09
WBGene00001137	eat-6	23506.7	-2.19259	0.161051	-13.6142	3.29657e-42	1.62476e-40
WBGene00010796	clip-1	2409.65	-2.19153	0.194694	-11.2563	2.15745e-29	6.05242e-28
WBGene00008545	F07A11.1	36.8284	-2.1914	0.671329	-3.26427	0.00109748	0.00307335
WBGene00003566	ncx-1	510.411	-2.19088	0.264915	-8.27014	1.33802e-16	1.66004e-15
WBGene00007107	pfd-4	148.538	-2.18985	0.344342	-6.3595	2.0241e-10	1.47046e-09
WBGene00010459	slc-25A32	40.4841	-2.1894	0.718134	-3.04874	0.00229804	0.00600797
WBGene00017289	F09E5.11	742.283	-2.18632	0.229918	-9.5091	1.92315e-21	3.34304e-20
WBGene00021043	pck-1	5980.01	-2.18469	0.184241	-11.8578	1.96136e-32	6.30445e-31
WBGene00011762	T13H10.2	81.1217	-2.1825	0.509876	-4.28046	1.86507e-05	7.15511e-05
WBGene00219343	Y17D7C.9	16.7717	-2.18073	0.998973	-2.18297	0.0290377	0.0570852
WBGene00003748	nlp-10	29.3458	-2.18071	0.695275	-3.13648	0.00170991	0.00460274
WBGene00011831	T19B10.2	4858.86	-2.17866	0.161228	-13.5129	1.31259e-41	6.20175e-40
WBGene00011121	R07E5.17	177.101	-2.17805	0.312541	-6.96885	3.19536e-12	2.7563e-11
WBGene00235308	C37C3.17	29.0701	-2.17632	0.745391	-2.9197	0.00350373	0.00877887
WBGene00001987	hot-2	138.524	-2.17603	0.349007	-6.23491	4.52034e-10	3.16323e-09
WBGene00022031	Y65B4A.8	175.943	-2.1742	0.401478	-5.41548	6.11233e-08	3.30124e-07
WBGene00012554	Y37D8A.16	1354.19	-2.17182	0.240535	-9.02909	1.73108e-19	2.63392e-18
WBGene00010345	F59F5.7	1129.88	-2.17164	0.244697	-8.87481	7.00511e-19	1.02491e-17
WBGene00010755	vglu-2	509.801	-2.17093	0.20856	-10.4092	2.25175e-25	4.99118e-24
WBGene00016532	C39D10.5	58.545	-2.17088	0.687662	-3.1569	0.00159457	0.00431724
WBGene00018862	wago-2	84.8126	-2.17031	0.480875	-4.51324	6.38432e-06	2.65923e-05
WBGene00014667	C06A1.4	225.781	-2.16991	0.438655	-4.94674	7.54658e-07	3.54126e-06
WBGene00002141	inx-19	83.942	-2.16838	0.39845	-5.44205	5.2671e-08	2.86195e-07
WBGene00271821	T28C12.15	15.4478	-2.16642	0.907359	-2.38761	0.0169583	0.0357005
WBGene00022033	Y65B4BL.1	7444.17	-2.16463	0.23486	-9.21671	3.06349e-20	4.8675e-19
WBGene00007228	acs-7	903.232	-2.16362	0.257471	-8.40336	4.33885e-17	5.57004e-16
WBGene00009843	F48C5.2	46.5091	-2.16184	0.643007	-3.36207	0.000773599	0.00223457
WBGene00001819	haf-9	588.938	-2.16016	0.244975	-8.81787	1.16662e-18	1.68723e-17
WBGene00007653	cysl-1	1043.83	-2.15983	0.222924	-9.68863	3.37005e-22	6.11179e-21
WBGene00016343	cnnm-3	227.057	-2.15966	0.35109	-6.1513	7.68494e-10	5.22926e-09
WBGene00015019	B0205.4	77.8942	-2.15823	0.459583	-4.69606	2.65228e-06	1.16065e-05
WBGene00194737	Y50D7A.13	26.5804	-2.15781	0.829597	-2.60104	0.00929422	0.0209449
WBGene00020270	T05H4.7	65.0105	-2.15722	0.445847	-4.83847	1.30841e-06	5.96664e-06
WBGene00015980	C18G1.1	66.2619	-2.15575	0.57548	-3.746	0.000179675	0.000585454
WBGene00013380	memi-2	68.9521	-2.15573	0.698296	-3.08712	0.00202104	0.00535084
WBGene00271716	F39E9.28	26.2166	-2.15486	0.713215	-3.02134	0.00251661	0.0065214
WBGene00020390	T10B5.4	407.615	-2.15446	0.253881	-8.48609	2.13704e-17	2.80066e-16
WBGene00006532	tba-6	92.6363	-2.15421	0.544786	-3.95423	7.67802e-05	0.000265248
WBGene00044437	Y47G6A.32	41.9305	-2.15414	0.630389	-3.41716	0.000632777	0.0018686
WBGene00018772	F53G12.4	38.1754	-2.15325	0.680108	-3.16604	0.00154532	0.00420017
WBGene00000288	cal-4	38.1227	-2.15207	0.63686	-3.37919	0.000727002	0.00211749
WBGene00002978	lev-11	11884.3	-2.15181	0.178031	-12.0867	1.24143e-33	4.22826e-32
WBGene00018002	twk-47	14.1192	-2.14922	0.940883	-2.28426	0.0223565	0.0454213
WBGene00021950	cutl-26	846.478	-2.14894	0.251408	-8.54762	1.25649e-17	1.67284e-16
WBGene00006754	unc-15	25669.6	-2.14699	0.199315	-10.7718	4.676e-27	1.15458e-25
WBGene00001566	acdh-13	120.637	-2.14644	0.408842	-5.25005	1.52062e-07	7.81004e-07
WBGene00021768	Y51F10.7	244.82	-2.14524	0.290367	-7.38802	1.49031e-13	1.43417e-12
WBGene00004182	prk-1	144.627	-2.14467	0.340984	-6.28966	3.18159e-10	2.25402e-09
WBGene00004950	sox-3	41.746	-2.14305	0.699504	-3.06367	0.00218639	0.00574023
WBGene00000998	dig-1	40220.5	-2.14296	0.174592	-12.2741	1.24753e-34	4.40421e-33
WBGene00004246	puf-10	94.179	-2.14186	0.438597	-4.88344	1.04251e-06	4.81172e-06
WBGene00009732	cope-1	686.113	-2.14186	0.274847	-7.79289	6.54911e-15	7.25831e-14
WBGene00006778	unc-42	589.869	-2.14109	0.222933	-9.60419	7.67617e-22	1.36649e-20
WBGene00016638	perm-4	680.005	-2.14089	1.55603	-1.37587	0.168862	0.255879
WBGene00006725	ubl-1	2284.89	-2.13856	0.190968	-11.1985	4.1456e-29	1.1376e-27
WBGene00003658	nhr-68	91.0325	-2.13829	0.457787	-4.67092	2.99856e-06	1.30627e-05
WBGene00001454	flp-11	53.706	-2.13619	0.605316	-3.52906	0.000417045	0.00127343
WBGene00219317	F31E3.12	27.1426	-2.13539	0.758236	-2.81627	0.00485853	0.0117812
WBGene00019012	F57C9.6	30.7986	-2.13535	0.64446	-3.31339	0.000921724	0.00262265
WBGene00016101	C25E10.12	145.725	-2.1331	0.415981	-5.12787	2.93035e-07	1.4454e-06
WBGene00001000	dim-1	6066.12	-2.13078	0.187328	-11.3746	5.596e-30	1.60206e-28
WBGene00019640	dos-2	54.8935	-2.12887	0.542431	-3.92469	8.68426e-05	0.000298044
WBGene00020813	T25G12.6	59.584	-2.12802	0.574603	-3.70347	0.000212668	0.000684109
WBGene00007951	dmsr-8	80.847	-2.12777	0.54232	-3.92345	8.72894e-05	0.000299332
WBGene00000280	cah-2	103.601	-2.12702	0.43038	-4.94219	7.72488e-07	3.61722e-06
WBGene00007908	C34B4.3	41.9959	-2.12635	0.643116	-3.30633	0.000945278	0.00268338
WBGene00013455	ssu-2	69.4778	-2.12509	0.509435	-4.17147	3.02646e-05	0.000111971
WBGene00017687	ets-4	795.742	-2.12431	0.243664	-8.71817	2.82726e-18	3.94811e-17
WBGene00000283	cah-5	239.651	-2.1238	0.287411	-7.38942	1.4747e-13	1.42023e-12
WBGene00016431	C35A11.4	37.3405	-2.12295	0.693175	-3.06264	0.0021939	0.00575757
WBGene00003957	pcp-2	187.273	-2.12263	0.48909	-4.33996	1.42508e-05	5.5848e-05
WBGene00016628	slc-36.5	100.1	-2.12049	1.21146	-1.75037	0.080055	0.137239
WBGene00003860	oig-2	49.0224	-2.11805	0.604026	-3.50656	0.000453939	0.0013786
WBGene00017717	F22F4.4	50.7228	-2.11729	0.775365	-2.7307	0.00632004	0.0148918
WBGene00016084	cht-3	73.7909	-2.11615	0.778162	-2.71942	0.00653957	0.0153495
WBGene00013421	fbxa-220	25.5765	-2.11463	0.695114	-3.04214	0.00234903	0.00612503
WBGene00016974	lron-15	388.053	-2.11391	0.350381	-6.03316	1.6078e-09	1.05629e-08
WBGene00021487	comt-3	81.4832	-2.11205	0.512987	-4.11716	3.83573e-05	0.000139691
WBGene00020952	kel-8	176.985	-2.11074	0.362719	-5.81922	5.91233e-09	3.63711e-08
WBGene00008498	F01D5.8	62.9863	-2.10975	0.480669	-4.38919	1.13776e-05	4.52368e-05
WBGene00008967	F20B10.3	73.0043	-2.10958	0.547815	-3.8509	0.000117685	0.000395473
WBGene00020339	ttr-59	38.0917	-2.10958	0.697578	-3.02414	0.00249338	0.00646652
WBGene00002058	ifd-2	709.714	-2.10824	0.253802	-8.30664	9.8454e-17	1.23613e-15
WBGene00004033	pkc-2	477.073	-2.10622	0.27915	-7.54512	4.51868e-14	4.56151e-13
WBGene00011975	T24B1.1	425.706	-2.10619	0.219336	-9.60256	7.79831e-22	1.38627e-20
WBGene00012901	cnp-2	93.527	-2.10612	0.418067	-5.03776	4.71006e-07	2.2794e-06
WBGene00000753	col-180	125.114	-2.10607	0.521649	-4.03733	5.40628e-05	0.000192156
WBGene00007593	C14H10.3	1742.35	-2.1057	0.215596	-9.7669	1.56161e-22	2.92494e-21
WBGene00007347	C05G5.1	158.498	-2.10552	0.403086	-5.22351	1.75562e-07	8.92943e-07
WBGene00013672	catp-1	927.226	-2.10454	0.22626	-9.30141	1.38589e-20	2.26795e-19
WBGene00006913	vha-4	1503.79	-2.10213	0.577485	-3.64015	0.000272478	0.00085978
WBGene00001730	grl-21	92.4006	-2.10147	0.570996	-3.68036	0.000232906	0.000742746
WBGene00019724	M02B7.2	36.5968	-2.10134	0.701488	-2.99554	0.00273958	0.00704543
WBGene00044383	T05A7.11	338.244	-2.10052	0.310839	-6.75758	1.4032e-11	1.14441e-10
WBGene00011750	nhr-218	31.0924	-2.09956	0.744144	-2.82144	0.0047808	0.0116151
WBGene00020022	gldc-1	678.162	-2.09946	0.279542	-7.51036	5.89659e-14	5.89097e-13
WBGene00012607	Y38F1A.4	86.1523	-2.098	0.497302	-4.21878	2.45633e-05	9.23455e-05
WBGene00019909	R06A10.1	42.1465	-2.09429	0.619999	-3.37789	0.000730439	0.00212553
WBGene00011773	ttr-53	150.18	-2.09428	0.329374	-6.35836	2.0392e-10	1.48057e-09
WBGene00016330	C32E12.4	1305.47	-2.08924	0.184584	-11.3186	1.06138e-29	3.01115e-28
WBGene00008228	C50B8.6	258.065	-2.08841	0.260547	-8.01546	1.09723e-15	1.27804e-14
WBGene00044049	sfxn-5	269.616	-2.0879	0.289613	-7.2093	5.62407e-13	5.20879e-12
WBGene00002039	hum-6	5015.96	-2.08689	0.176244	-11.8409	2.39914e-32	7.67238e-31
WBGene00007938	C34F6.1	222.091	-2.08471	0.364047	-5.72649	1.02529e-08	6.10415e-08
WBGene00011763	T14B1.1	5975.59	-2.08464	0.22148	-9.41231	4.8534e-21	8.18759e-20
WBGene00001204	egl-38	107.958	-2.08434	0.378261	-5.51031	3.58204e-08	1.98497e-07
WBGene00003786	npa-1	4933.14	-2.08409	0.17028	-12.2392	1.91991e-34	6.7213e-33
WBGene00006861	cal-5	404.456	-2.08263	0.323679	-6.43424	1.24096e-10	9.19856e-10
WBGene00009903	F49E12.10	72.8714	-2.08037	0.547703	-3.79836	0.000145655	0.000481481
WBGene00012104	sygl-1	91.1834	-2.08028	0.43682	-4.76231	1.91386e-06	8.53867e-06
WBGene00010086	F55B11.4	61.2305	-2.07893	0.518944	-4.00607	6.17362e-05	0.000217217
WBGene00009563	F39H2.3	74.1506	-2.07406	0.480297	-4.31829	1.57243e-05	6.10701e-05
WBGene00009653	F43D9.1	6512.63	-2.07374	0.166591	-12.448	1.43317e-35	5.36074e-34
WBGene00006505	lagr-1	143.031	-2.07364	0.378839	-5.47366	4.40828e-08	2.41304e-07
WBGene00003525	nas-6	117.513	-2.07023	1.09268	-1.89463	0.0581416	0.104389
WBGene00018594	aman-3	97.3551	-2.06927	0.526012	-3.93389	8.35837e-05	0.000287566
WBGene00000048	acr-9	72.5173	-2.06888	0.540145	-3.83023	0.000128024	0.000426905
WBGene00003179	mec-18	56.7686	-2.06876	0.638054	-3.24229	0.00118572	0.00330058
WBGene00009397	clec-66	246.244	-2.0683	0.330522	-6.25768	3.90752e-10	2.75124e-09
WBGene00006562	tdc-1	253.68	-2.0674	0.437896	-4.72122	2.34431e-06	1.03359e-05
WBGene00020893	T28C12.6	38.4002	-2.06662	0.713967	-2.89455	0.00379697	0.00944396
WBGene00011955	cdka-1	784.299	-2.06373	0.25142	-8.20827	2.24389e-16	2.74331e-15
WBGene00018395	mtch-1	974.875	-2.06335	0.200962	-10.2674	9.88704e-25	2.12775e-23
WBGene00022242	sfrp-1	551.905	-2.0633	0.21027	-9.81263	9.93477e-23	1.8776e-21
WBGene00000155	app-1	272.304	-2.05971	0.351137	-5.86583	4.46904e-09	2.78192e-08
WBGene00012932	Y47D3A.21	85.3797	-2.05732	0.463796	-4.43583	9.172e-06	3.69823e-05
WBGene00000465	cpg-1	477.443	-2.05731	1.19975	-1.71477	0.086387	0.146441
WBGene00219749	linc-30	14.5822	-2.0542	0.879593	-2.3354	0.0195226	0.0404084
WBGene00020973	W03B1.3	314.354	-2.05394	0.286246	-7.17543	7.20809e-13	6.61733e-12
WBGene00020703	T22F7.4	19.5751	-2.0538	0.822516	-2.49698	0.0125257	0.0273922
WBGene00016749	C48E7.1	1025.02	-2.05212	0.222574	-9.21994	2.97272e-20	4.73525e-19
WBGene00007253	C01H6.3	23.4072	-2.05188	0.72277	-2.83891	0.00452685	0.0110681
WBGene00012857	pbo-5	69.4653	-2.05149	0.584294	-3.51105	0.000446335	0.00135726
WBGene00077491	K08H10.10	45.4823	-2.05087	0.613876	-3.34085	0.000835221	0.00239604
WBGene00000742	col-169	131.086	-2.04982	0.44081	-4.65012	3.31742e-06	1.43523e-05
WBGene00018340	anmt-2	54.9854	-2.04864	0.659983	-3.10408	0.00190872	0.00508884
WBGene00000441	ceh-18	283.465	-2.04839	0.249864	-8.19801	2.44402e-16	2.97929e-15
WBGene00006671	twk-17	181.763	-2.04765	0.423874	-4.8308	1.35982e-06	6.1854e-06
WBGene00016321	tppp-1	379.993	-2.04706	0.231545	-8.84086	9.4984e-19	1.38007e-17
WBGene00022743	mlt-7	383.693	-2.04662	0.261634	-7.82247	5.17978e-15	5.78662e-14
WBGene00010595	haao-1	42.2041	-2.04586	0.597519	-3.42392	0.000617252	0.00182577
WBGene00006059	stc-1	322.806	-2.04548	0.253977	-8.05382	8.02517e-16	9.44385e-15
WBGene00018405	F44A2.5	1259.51	-2.04485	0.20389	-10.0292	1.13462e-23	2.2743e-22
WBGene00000877	cyn-1	374.414	-2.04324	0.278184	-7.34492	2.05881e-13	1.96918e-12
WBGene00044176	C30G7.2	306.5	-2.04297	0.381668	-5.35274	8.66314e-08	4.58822e-07
WBGene00022383	not found	72.592	-2.04205	0.538045	-3.79531	0.000147459	0.000486934
WBGene00012939	subs-4	362.767	-2.04161	0.247826	-8.23809	1.74988e-16	2.15026e-15
WBGene00003097	lys-8	219.153	-2.04134	0.342426	-5.9614	2.5009e-09	1.60692e-08
WBGene00004910	snf-11	351.967	-2.03963	0.297278	-6.86101	6.83738e-12	5.72119e-11
WBGene00006217	str-173	60.5192	-2.03943	0.546962	-3.72864	0.000192513	0.000623744
WBGene00005153	srf-3	320.847	-2.03914	0.279554	-7.29426	3.00303e-13	2.83136e-12
WBGene00007679	C18D11.1	725.18	-2.039	0.20654	-9.87219	5.49489e-23	1.06083e-21
WBGene00008763	F13G3.3	53.2063	-2.03866	0.616381	-3.30746	0.00094145	0.00267514
WBGene00012188	W01G7.4	137.853	-2.03808	0.330474	-6.16716	6.95282e-10	4.76202e-09
WBGene00014101	gopc-1	113.494	-2.03698	0.38168	-5.33687	9.45623e-08	4.99143e-07
WBGene00007825	C30H6.8	57.0325	-2.03488	0.496913	-4.09504	4.22104e-05	0.00015275
WBGene00009779	F46C5.2	93.3287	-2.0346	0.426001	-4.77603	1.78788e-06	8.01643e-06
WBGene00006921	vha-12	15287	-2.0322	0.201907	-10.065	7.88481e-24	1.60091e-22
WBGene00003232	mgl-1	94.2439	-2.02477	0.572366	-3.53754	0.000403866	0.00123649
WBGene00018899	F55G1.1	100.471	-2.02399	0.476237	-4.24997	2.13797e-05	8.1203e-05
WBGene00012016	inpp-1	168.169	-2.02222	0.326375	-6.19601	5.79132e-10	4.0058e-09
WBGene00004374	rme-2	503.349	-2.02133	1.07596	-1.87863	0.0602955	0.107687
WBGene00017104	E02H9.6	12.5745	-2.01948	1.00458	-2.01027	0.0444021	0.0826624
WBGene00016033	C24A3.2	591.966	-2.01935	0.251448	-8.03088	9.67734e-16	1.1335e-14
WBGene00006845	unc-122	221.148	-2.01837	0.337498	-5.9804	2.22594e-09	1.43981e-08
WBGene00013578	scav-2	113.529	-2.01805	0.403601	-5.00011	5.7298e-07	2.73915e-06
WBGene00016838	C50F2.4	72.4118	-2.01755	0.512841	-3.93407	8.35195e-05	0.000287424
WBGene00020316	brc-2	82.9011	-2.01736	0.553564	-3.64431	0.000268114	0.000846861
WBGene00016568	C41G11.1	56.0826	-2.0161	0.611859	-3.29503	0.000984103	0.00278313
WBGene00001505	fut-1	111.464	-2.01592	0.426027	-4.7319	2.22428e-06	9.84638e-06
WBGene00000287	cal-3	12.6418	-2.01503	0.939296	-2.14526	0.0319324	0.0620082
WBGene00012854	Y44A6D.3	242.214	-2.01406	0.331758	-6.07086	1.27223e-09	8.44215e-09
WBGene00045410	E01G4.7	153.886	-2.01374	0.356211	-5.6532	1.57484e-08	9.13784e-08
WBGene00119203	T04A8.18	175.829	-2.01327	0.338129	-5.95414	2.61446e-09	1.67646e-08
WBGene00015124	anmt-1	63.2646	-2.01278	0.576394	-3.49202	0.000479377	0.00144897
WBGene00001099	dsc-4	2218.24	-2.01005	0.180327	-11.1467	7.43391e-29	2.01791e-27
WBGene00022100	Y69A2AR.31	1433.3	-2.00723	0.198598	-10.107	5.14379e-24	1.05806e-22
WBGene00017663	F21D12.3	343.629	-2.00685	0.248201	-8.08559	6.18631e-16	7.37662e-15
WBGene00018726	F53A9.3	51.5937	-2.0056	0.733317	-2.73497	0.0062385	0.014724
WBGene00016633	C44B11.1	29.7682	-2.00462	0.7477	-2.68105	0.00733909	0.0169742
WBGene00018257	F41B4.1	80.1823	-2.00446	0.445441	-4.49994	6.79736e-06	2.82038e-05
WBGene00015527	C06E2.1	102.277	-2.00366	0.505375	-3.96469	7.349e-05	0.000255003
WBGene00009883	F49C12.14	24.6289	-2.00258	0.845854	-2.36753	0.0179073	0.0373915
WBGene00000379	cct-4	2573.02	-2.00217	0.16123	-12.4181	2.0854e-35	7.70863e-34
WBGene00011503	gcc-2	289.219	-2.00183	0.254103	-7.87802	3.32604e-15	3.76252e-14
WBGene00008610	F09C3.2	59.97	-2.00023	0.628911	-3.18046	0.00147039	0.00401737
WBGene00022412	Y102A11A.2	548.302	-2.00013	0.222717	-8.98059	2.69317e-19	4.04394e-18
WBGene00013135	rga-2	3834.99	-1.99989	0.185943	-10.7554	5.59021e-27	1.37491e-25
WBGene00011523	T06D8.2	39.9026	-1.99949	0.668078	-2.99289	0.00276347	0.0070967
WBGene00019944	R07G3.8	457.752	-1.99913	0.250693	-7.97442	1.53097e-15	1.77012e-14
WBGene00012779	cdkl-1	62.8882	-1.99884	0.492632	-4.05747	4.96063e-05	0.000177419
WBGene00021593	Y46E12A.3	26.7193	-1.99819	0.828002	-2.41327	0.0158102	0.0336442
WBGene00011314	T01B7.9	150.479	-1.99813	0.38314	-5.21515	1.83671e-07	9.32299e-07
WBGene00012279	W05B10.4	87.5273	-1.998	0.48507	-4.11898	3.80549e-05	0.000138711
WBGene00007106	B0035.3	15.4028	-1.99725	0.859369	-2.32409	0.0201206	0.0414414
WBGene00009328	F32D8.3	48.6136	-1.99684	0.585105	-3.41278	0.000643034	0.0018931
WBGene00003400	dapk-1	3623.71	-1.9966	0.196614	-10.1549	3.15027e-24	6.58778e-23
WBGene00009819	F47B10.8	63.3913	-1.99648	0.465817	-4.28597	1.81944e-05	6.99289e-05
WBGene00008851	F15B9.8	2046.85	-1.99616	0.213791	-9.33697	9.91288e-21	1.64795e-19
WBGene00007857	C31H5.6	24.6361	-1.9957	0.863151	-2.31212	0.0207713	0.0425933
WBGene00003771	nlp-33	76.7162	-1.99516	0.515328	-3.87162	0.000108112	0.00036565
WBGene00219803	C06A1.12	24.6646	-1.9951	0.703212	-2.83713	0.0045521	0.0111111
WBGene00022500	lfi-1	13337.2	-1.99455	0.178864	-11.1512	7.06324e-29	1.92144e-27
WBGene00016768	cyp-33E1	94.1833	-1.99432	0.422186	-4.7238	2.31478e-06	1.02185e-05
WBGene00000768	cor-1	1402.49	-1.99404	0.201978	-9.87258	5.47374e-23	1.05837e-21
WBGene00009291	clec-264	108.551	-1.99391	0.435832	-4.57495	4.76345e-06	2.01776e-05
WBGene00018374	tag-343	1740.65	-1.99319	0.198436	-10.0445	9.7144e-24	1.95972e-22
WBGene00019896	R05G6.1	14.23	-1.99089	1.0125	-1.9663	0.0492641	0.0902948
WBGene00004420	rpl-9	4091.68	-1.99016	0.209026	-9.52112	1.71326e-21	3.0031e-20
WBGene00013029	glrx-5	436.498	-1.98772	0.264704	-7.50922	5.94807e-14	5.93767e-13
WBGene00008819	shw-1	239.08	-1.98625	0.315041	-6.30474	2.88674e-10	2.05556e-09
WBGene00013720	Y106G6H.8	57.4753	-1.98562	0.48676	-4.07927	4.51773e-05	0.000162381
WBGene00013926	nep-1	912.114	-1.98554	0.209161	-9.49285	2.24812e-21	3.88643e-20
WBGene00011978	T24B8.4	4160.5	-1.98504	0.227864	-8.71151	2.99863e-18	4.16889e-17
WBGene00002274	lec-11	68.165	-1.98327	0.711919	-2.78581	0.0053394	0.0128235
WBGene00003981	pes-8	43.5744	-1.98288	0.579204	-3.42345	0.000618309	0.00182845
WBGene00016261	C30F12.2	71.6312	-1.98105	0.557293	-3.55478	0.000378299	0.00116531
WBGene00000281	cah-3	102.782	-1.98079	0.433512	-4.56917	4.89664e-06	2.06999e-05
WBGene00012285	pitr-6	70.7021	-1.9802	0.426695	-4.64079	3.47075e-06	1.49744e-05
WBGene00021089	W08E12.8	32.6861	-1.97995	0.708001	-2.79654	0.00516536	0.0124412
WBGene00007757	C27A7.6	36.6611	-1.9799	0.708972	-2.79264	0.00522804	0.0125809
WBGene00013292	Y57G11A.4	70.8465	-1.97922	0.710941	-2.78395	0.00537017	0.0128885
WBGene00003746	nlp-8	363.829	-1.97583	0.300527	-6.57454	4.88035e-11	3.75374e-10
WBGene00044074	mltn-5	37.5779	-1.97495	0.66301	-2.97877	0.00289407	0.00739132
WBGene00022173	set-27	596.568	-1.97479	0.229394	-8.60875	7.38613e-18	1.00356e-16
WBGene00020482	T13C2.7	34.0005	-1.97206	0.718669	-2.74404	0.00606874	0.0143747
WBGene00013585	cyp-42A1	947.198	-1.97041	0.193959	-10.1589	3.02564e-24	6.3377e-23
WBGene00000644	col-68	123.393	-1.96914	0.39543	-4.97975	6.36678e-07	3.0184e-06
WBGene00011453	ugt-56	26.3148	-1.96827	0.735641	-2.67558	0.00746006	0.0172223
WBGene00008687	F11A10.6	325.52	-1.96641	0.2685	-7.32367	2.41272e-13	2.292e-12
WBGene00007743	C26C6.9	130.55	-1.96489	0.393487	-4.99353	5.92853e-07	2.82448e-06
WBGene00007959	C35C5.10	499.199	-1.96392	0.296819	-6.61656	3.67661e-11	2.86292e-10
WBGene00022823	ZK813.4	23.4986	-1.96256	0.800317	-2.45223	0.0141973	0.0306268
WBGene00003625	nhr-31	1259.4	-1.95996	0.209957	-9.33502	1.00975e-20	1.67422e-19
WBGene00015704	tiam-1	512.821	-1.9596	0.256704	-7.63368	2.28138e-14	2.38341e-13
WBGene00004219	ptr-4	3404.34	-1.95957	0.167322	-11.7114	1.11486e-31	3.49416e-30
WBGene00006822	unc-93	101.437	-1.95886	0.410581	-4.77094	1.8337e-06	8.20432e-06
WBGene00015976	C18E3.9	128.621	-1.95791	0.351373	-5.57218	2.51578e-08	1.42169e-07
WBGene00001116	dyc-1	1665.11	-1.95788	0.201358	-9.7234	2.39646e-22	4.3969e-21
WBGene00021543	Y43B11AR.1	226.314	-1.95536	0.34031	-5.74582	9.14759e-09	5.48768e-08
WBGene00017449	otpl-3	68.6869	-1.95414	0.687768	-2.84128	0.00449322	0.0109908
WBGene00006873	vab-7	62.7242	-1.95298	0.486217	-4.01668	5.90238e-05	0.000208608
WBGene00022783	tomm-7	54.3625	-1.95146	0.498925	-3.91134	9.17865e-05	0.000313897
WBGene00008187	C49A1.5	26.2466	-1.95015	0.824497	-2.36526	0.0180174	0.0376006
WBGene00019546	glct-6	78.4702	-1.94879	0.511418	-3.81056	0.000138653	0.000459909
WBGene00018188	F38E9.6	28.322	-1.94831	0.706125	-2.75916	0.00579504	0.0137992
WBGene00044414	C06A5.12	45.1135	-1.94814	0.53254	-3.65821	0.000253984	0.000805266
WBGene00015691	viln-1	1843.19	-1.9473	0.179172	-10.8683	1.6313e-27	4.19266e-26
WBGene00021564	Y45G12B.3	319.207	-1.94634	0.337301	-5.77034	7.91107e-09	4.79857e-08
WBGene00005652	srr-1	105.723	-1.94555	0.437717	-4.44478	8.79836e-06	3.56473e-05
WBGene00008042	C40H1.7	14.4148	-1.94519	0.882195	-2.20494	0.027458	0.0544224
WBGene00019759	M03F4.6	577.793	-1.94369	0.209189	-9.29153	1.52088e-20	2.4824e-19
WBGene00022599	daf-41	1299.74	-1.94288	0.211043	-9.20608	3.38242e-20	5.35394e-19
WBGene00004113	pqn-24	162.663	-1.94276	0.363251	-5.34826	8.88025e-08	4.69924e-07
WBGene00021425	ppgn-1	154.167	-1.94191	0.316044	-6.14442	8.02549e-10	5.4345e-09
WBGene00006654	ttx-3	64.887	-1.93814	0.675228	-2.87036	0.00410008	0.0101257
WBGene00009109	degt-1	89.6557	-1.93731	0.434213	-4.46166	8.13264e-06	3.32286e-05
WBGene00016468	C36B7.5	152.568	-1.9364	0.34582	-5.59944	2.1504e-08	1.2229e-07
WBGene00007299	C04F12.5	26.5409	-1.93316	0.681849	-2.83517	0.0045801	0.0111707
WBGene00012134	T28F3.8	102.168	-1.93269	0.38404	-5.03251	4.84088e-07	2.33731e-06
WBGene00018275	F41C3.11	142.942	-1.93068	0.332034	-5.81472	6.07361e-09	3.72903e-08
WBGene00016722	C46G7.2	2095.7	-1.92568	0.271312	-7.09765	1.26897e-12	1.13431e-11
WBGene00017666	F21E9.2	102.295	-1.92292	0.47094	-4.08314	4.44311e-05	0.000160003
WBGene00014262	ZK1321.4	78.6453	-1.92164	0.486449	-3.95034	7.80407e-05	0.000269233
WBGene00018367	F42H10.3	1762.13	-1.9214	0.181984	-10.5581	4.66228e-26	1.09116e-24
WBGene00022810	ZK721.3	45.3308	-1.92103	0.607637	-3.16147	0.00156977	0.00425649
WBGene00016435	C35B1.5	745.499	-1.92061	0.24498	-7.83985	4.51072e-15	5.05716e-14
WBGene00014061	ZK673.5	14.7237	-1.92044	0.871419	-2.2038	0.0275382	0.0545383
WBGene00012440	nlp-53	58.476	-1.9198	0.572019	-3.35618	0.000790265	0.00227852
WBGene00017320	F09G8.5	55.8631	-1.91632	0.500285	-3.83045	0.000127907	0.000426628
WBGene00010998	R03G8.3	58.337	-1.9152	0.594566	-3.22117	0.00127668	0.00353189
WBGene00015427	C04E6.13	24.0009	-1.91373	0.734343	-2.60604	0.00915959	0.0206749
WBGene00015803	C15H9.9	1287.92	-1.9108	0.224263	-8.52037	1.5905e-17	2.10858e-16
WBGene00010449	K01A11.1	35.6826	-1.90982	0.636415	-3.0009	0.00269179	0.00693814
WBGene00007257	C01H6.8	80.1411	-1.90833	0.526518	-3.62444	0.000289586	0.000910561
WBGene00017904	lim-8	7480.92	-1.90696	0.180612	-10.5584	4.64742e-26	1.08971e-24
WBGene00021213	Y18H1A.9	543.884	-1.90393	0.272573	-6.98502	2.84823e-12	2.47727e-11
WBGene00002977	lev-10	661.657	-1.90229	0.216	-8.80691	1.28645e-18	1.85628e-17
WBGene00016118	C25H3.9	1467.58	-1.902	0.19457	-9.77541	1.43568e-22	2.69308e-21
WBGene00011407	ppat-1	69.8622	-1.90058	0.717808	-2.64776	0.00810273	0.0185452
WBGene00220111	W01H2.11	39.7876	-1.89979	0.647066	-2.93601	0.00332465	0.00837023
WBGene00002583	let-363	4248.05	-1.89783	0.171108	-11.0914	1.38159e-28	3.72614e-27
WBGene00008052	ctns-1	70.7514	-1.8972	0.503697	-3.76656	0.000165515	0.000542153
WBGene00010742	K10D6.2	1786.66	-1.8961	0.213401	-8.88515	6.38374e-19	9.36183e-18
WBGene00012254	W04E12.9	164.877	-1.89492	0.320532	-5.9118	3.38381e-09	2.14138e-08
WBGene00045250	Y73B6BL.47	46.6437	-1.89336	0.590938	-3.20399	0.00135537	0.00373149
WBGene00000115	alh-9	673.554	-1.89317	0.196723	-9.62355	6.35952e-22	1.14018e-20
WBGene00022389	pde-6	912.298	-1.89198	0.207757	-9.1067	8.49247e-20	1.31607e-18
WBGene00008656	lron-5	65.6112	-1.8918	0.550857	-3.43429	0.000594116	0.00176274
WBGene00008542	scav-6	414.591	-1.88872	0.234089	-8.0684	7.12273e-16	8.45312e-15
WBGene00018569	F47F2.1	157.312	-1.88833	0.427243	-4.4198	9.87908e-06	3.96805e-05
WBGene00003527	nas-8	45.6983	-1.88791	0.582767	-3.23957	0.0011971	0.00332783
WBGene00011059	R06C1.4	582.252	-1.88765	0.937081	-2.0144	0.0439679	0.0820108
WBGene00019727	zig-12	429.659	-1.88761	0.267314	-7.0614	1.64835e-12	1.46199e-11
WBGene00010059	F54E4.3	866.559	-1.88735	0.218636	-8.63239	6.00806e-18	8.22542e-17
WBGene00007766	C27C7.1	59.0695	-1.8863	0.5857	-3.22059	0.00127926	0.00353668
WBGene00010130	vha-14	3747.71	-1.88387	0.193061	-9.75793	1.70604e-22	3.18595e-21
WBGene00004913	snn-1	222.489	-1.88233	0.297129	-6.33505	2.37268e-10	1.7079e-09
WBGene00022797	best-24	159.047	-1.88206	0.452934	-4.15526	3.24916e-05	0.000119542
WBGene00010904	ugt-62	181.565	-1.88171	0.358885	-5.24322	1.57799e-07	8.08156e-07
WBGene00019146	H02F09.3	77.7425	-1.88142	0.547259	-3.4379	0.00058624	0.00174264
WBGene00008338	pafo-1	248.992	-1.87842	0.263433	-7.13055	9.99719e-13	9.03269e-12
WBGene00011063	cpg-3	153.116	-1.8777	1.07132	-1.7527	0.0796537	0.136667
WBGene00016143	eri-9	263.028	-1.87704	0.262193	-7.15899	8.12722e-13	7.43398e-12
WBGene00011522	srap-1	1348.34	1899-12-28 02:57:54	0.241163	-7.78087	7.20266e-15	7.92671e-14
WBGene00044301	lgc-28	180.837	-1.87632	0.321672	-5.83301	5.44355e-09	3.36189e-08
WBGene00019757	memb-2	96.2257	-1.87432	0.424007	-4.42048	9.84818e-06	3.9569e-05
WBGene00050943	ZC412.10	56.9316	-1.8701	0.490595	-3.8119	0.000137904	0.000457665
WBGene00012274	W05B5.1	573.147	-1.8694	0.278487	-6.71269	1.91063e-11	1.53829e-10
WBGene00006919	vha-10	3010.7	-1.86901	0.231166	-8.08513	6.20966e-16	7.39744e-15
WBGene00004831	slo-2	343.119	-1.86893	0.265981	-7.02656	2.1168e-12	1.85523e-11
WBGene00011078	R07B1.6	11.7288	-1.86893	1.08711	-1.71918	0.0855821	0.145328
WBGene00021445	not found	38.723	-1.86817	0.667109	-2.80039	0.00510402	0.0123147
WBGene00010080	F55A11.7	113.899	-1.86738	0.360333	-5.18237	2.19081e-07	1.09873e-06
WBGene00001190	egl-23	98.9545	-1.86651	0.553279	-3.37353	0.0007421	0.00215398
WBGene00006788	unc-53	8895.57	-1.86319	0.172526	-10.7995	3.46166e-27	8.63217e-26
WBGene00009617	slc-9B.1	416.71	-1.86304	0.262159	-7.10655	1.18977e-12	1.06579e-11
WBGene00020319	npr-31	78.6773	-1.86083	0.555015	-3.35275	0.000800119	0.00230376
WBGene00000610	col-33	37.0335	-1.85995	0.765161	-2.4308	0.0150654	0.0322725
WBGene00021981	lgc-26	151.525	-1.85923	0.326968	-5.68627	1.29841e-08	7.62901e-08
WBGene00021421	Y38F2AR.3	128.413	-1.85843	0.348484	-5.3329	9.66558e-08	5.09979e-07
WBGene00001159	eff-1	567.387	-1.85781	0.209593	-8.8639	7.72662e-19	1.12785e-17
WBGene00003497	mup-4	8899.54	-1.85758	0.147126	-12.6258	1.52258e-36	5.90611e-35
WBGene00009433	F35E12.9	211.227	-1.85704	0.350604	-5.29668	1.17924e-07	6.14713e-07
WBGene00000747	col-174	133.024	-1.85529	0.327542	-5.66427	1.47652e-08	8.61509e-08
WBGene00006753	unc-14	5300.86	-1.85493	0.170946	-10.8509	1.97389e-27	5.02184e-26
WBGene00020704	not found	118.603	-1.85373	0.365847	-5.06696	4.0422e-07	1.96908e-06
WBGene00020809	T25G12.1	15.3223	-1.85332	0.939154	-1.97339	0.0484507	0.0890495
WBGene00013860	ZC247.2	623.633	-1.85289	0.21093	-8.78439	1.57213e-18	2.24274e-17
WBGene00012545	Y37D8A.3	18.8982	-1.85177	0.849673	-2.17939	0.0293029	0.0575165
WBGene00044641	T01D1.8	124.381	-1.85037	0.486849	-3.8007	0.000144289	0.000477468
WBGene00002053	ifb-1	4925.73	-1.84991	0.186623	-9.91253	3.67241e-23	7.1669e-22
WBGene00016454	C35E7.2	772.942	-1.84931	0.204641	-9.03684	1.61271e-19	2.46576e-18
WBGene00004483	rps-14	15270.8	-1.84839	0.239893	-7.70505	1.30791e-14	1.40304e-13
WBGene00022867	ZK1240.2	24.625	-1.84511	0.846253	-2.18033	0.0292331	0.0574065
WBGene00000063	act-1	5533.56	-1.84477	0.276226	-6.6785	2.41406e-11	1.92146e-10
WBGene00019289	kcc-3	119.889	-1.84457	0.364112	-5.06595	4.06366e-07	1.978e-06
WBGene00007375	C06C3.4	269.849	-1.84298	0.272179	-6.77121	1.27706e-11	1.04629e-10
WBGene00013328	Y57G11C.39	84.447	-1.84253	0.562353	-3.27646	0.00105117	0.00295749
WBGene00014224	mrps-23	95.4509	-1.84003	0.410262	-4.48502	7.29069e-06	3.00424e-05
WBGene00000069	acy-2	82.6324	-1.83979	0.450941	-4.0799	4.50557e-05	0.000162066
WBGene00045305	ZC250.4	54.0592	-1.83795	0.684215	-2.68622	0.00722657	0.0167509
WBGene00015425	C04E6.11	136.512	-1.83697	0.467495	-3.92938	8.51646e-05	0.000292765
WBGene00009393	clec-62	24.203	-1.83399	0.843417	-2.17447	0.0296695	0.0581075
WBGene00019324	K02F2.5	176.344	-1.83391	0.335523	-5.46583	4.60749e-08	2.5166e-07
WBGene00021740	Y50D4B.1	84.727	-1.8336	0.444873	-4.12164	3.76187e-05	0.00013732
WBGene00008258	mans-2	243.961	-1.83287	0.404054	-4.53619	5.7279e-06	2.39961e-05
WBGene00003371	mlc-3	8389.5	-1.83152	0.233894	-7.83057	4.85677e-15	5.44027e-14
WBGene00016121	ift-43	94.9454	-1.83104	0.481088	-3.80604	0.000141207	0.000468009
WBGene00022206	Y73B3A.4	27.4217	-1.8304	0.737837	-2.48076	0.0131101	0.0285263
WBGene00022644	dod-19	117.47	-1.82964	0.417404	-4.38339	1.16849e-05	4.63707e-05
WBGene00007520	C11E4.6	3136.29	-1.829	0.172658	-10.5932	3.2037e-26	7.597e-25
WBGene00001989	hot-4	487.471	-1.82873	0.290652	-6.29181	3.1378e-10	2.2255e-09
WBGene00001466	flr-2	91.7479	-1.82807	0.410689	-4.45123	8.53793e-06	3.46928e-05
WBGene00007101	B0024.11	115.447	-1.82728	0.446845	-4.08929	4.32687e-05	0.000156309
WBGene00010496	sec-12	328.423	-1.82621	0.246033	-7.42263	1.14814e-13	1.12033e-12
WBGene00012370	W09G3.7	37.5958	-1.82615	0.628356	-2.90623	0.00365814	0.00913117
WBGene00007687	C18E9.7	566.155	-1.82522	0.225254	-8.10293	5.36491e-16	6.41543e-15
WBGene00016004	C18H9.6	48.2739	-1.82413	0.803315	-2.27075	0.0231622	0.0468537
WBGene00021212	Y18H1A.8	14.763	-1.82394	0.960216	-1.89951	0.0574975	0.10338
WBGene00007495	C09G9.5	64.1349	-1.82162	0.567108	-3.21211	0.00131763	0.00363697
WBGene00011412	mrpl-16	141.656	-1.82114	0.315846	-5.76591	8.12207e-09	4.91469e-08
WBGene00003516	nab-1	13701.3	-1.82004	0.202115	-9.00495	2.15769e-19	3.25935e-18
WBGene00008742	F13D12.8	68.9737	-1.82003	0.44606	-4.08023	4.49904e-05	0.000161878
WBGene00015388	C03F11.2	83.4661	-1.81983	0.426367	-4.26823	1.97033e-05	7.53137e-05
WBGene00004175	pqn-96	410.15	-1.81797	0.260439	-6.98039	2.94362e-12	2.55669e-11
WBGene00015544	C06E8.5	121.638	-1.81773	0.491284	-3.69995	0.000215642	0.000692788
WBGene00020575	T19D7.7	30.5441	-1.81702	0.631391	-2.8778	0.0040046	0.00991135
WBGene00019009	clec-90	130.747	-1.81518	0.366791	-4.9488	7.4673e-07	3.50838e-06
WBGene00013921	best-22	111.612	-1.81371	0.481531	-3.76655	0.000165519	0.000542153
WBGene00014307	F07H5.3	1424.98	-1.8123	0.247797	-7.31364	2.59992e-13	2.46424e-12
WBGene00018581	not found	275.946	-1.81034	0.253202	-7.1498	8.69065e-13	7.90333e-12
WBGene00008987	F20G2.3	282.994	-1.80926	0.303469	-5.96192	2.49295e-09	1.60263e-08
WBGene00006775	unc-39	112.481	-1.80814	0.491003	-3.68256	0.000230907	0.000737868
WBGene00019486	K07D4.6	146.116	-1.80695	0.360768	-5.00862	5.48226e-07	2.6278e-06
WBGene00003071	lrp-1	18613.7	-1.80629	0.180807	-9.99016	1.68306e-23	3.33114e-22
WBGene00009811	F47B8.10	226.335	-1.80569	0.4178	-4.32189	1.54698e-05	6.01375e-05
WBGene00013962	ZK287.1	1092.94	-1.8035	0.184086	-9.79703	1.1595e-22	2.18152e-21
WBGene00021036	W05F2.4	7407.16	-1.80329	0.205711	-8.76611	1.84941e-18	2.62045e-17
WBGene00045276	F18E3.13	25.448	-1.80306	0.772276	-2.33474	0.0195569	0.0404595
WBGene00013025	vha-13	10085.8	-1.80161	0.163418	-11.0245	2.91026e-28	7.73279e-27
WBGene00006491	acl-3	28.8442	-1.79995	0.696222	-2.58531	0.00972905	0.0217992
WBGene00010327	F59C6.8	127.277	-1.79984	0.405472	-4.43887	9.04339e-06	3.65223e-05
WBGene00011718	T11G6.3	28.2008	-1.79809	0.772031	-2.32904	0.0198572	0.0409661
WBGene00019204	H14N18.4	83.6447	-1.79805	0.490745	-3.66392	0.00024838	0.000788491
WBGene00010873	trpa-2	176.379	-1.79797	0.304597	-5.90279	3.574e-09	2.25153e-08
WBGene00003818	nsf-1	1493.5	-1.7978	0.207544	-8.66224	4.62597e-18	6.38893e-17
WBGene00011878	ador-1	34.5098	-1.79591	0.77004	-2.33223	0.0196886	0.0406849
WBGene00015197	B0454.6	190.973	-1.79589	0.357469	-5.0239	5.06319e-07	2.43902e-06
WBGene00044742	Y55F3BR.10	57.1983	-1.79587	0.478201	-3.75547	0.000173013	0.000564641
WBGene00009315	F32B4.5	50.0262	-1.79363	0.688809	-2.60396	0.00921524	0.0207856
WBGene00010330	F59D12.2	337.735	-1.79331	0.265628	-6.75121	1.46617e-11	1.19422e-10
WBGene00019900	vdac-1	2795.47	-1.79324	0.1651	-10.8615	1.7575e-27	4.49863e-26
WBGene00019473	cyp-35A5	54.1576	-1.79299	0.499433	-3.59005	0.000330614	0.00103182
WBGene00003941	pbo-1	181.862	-1.79248	0.292759	-6.1227	9.20001e-10	6.20642e-09
WBGene00003843	2020-10-02	67.3312	-1.79236	0.476611	-3.76063	0.000169485	0.000554236
WBGene00015934	ceh-48	1196.06	-1.79124	0.190269	-9.41425	4.76473e-21	8.04881e-20
WBGene00008993	F21A3.3	26.4529	-1.79032	0.672619	-2.66171	0.0077744	0.0178692
WBGene00017013	ensh-1	221.675	-1.79013	0.339631	-5.2708	1.35827e-07	7.03081e-07
WBGene00009371	F33H2.8	359.859	-1.78959	0.268766	-6.65854	2.76558e-11	2.182e-10
WBGene00017327	F10C1.8	52.2969	-1.78881	0.648706	-2.7575	0.00582449	0.0138588
WBGene00044636	B0393.9	71.3666	-1.78852	0.424827	-4.21001	2.5536e-05	9.57192e-05
WBGene00019870	R04E5.7	33.4042	-1.78841	0.738032	-2.42321	0.015384	0.0328374
WBGene00012070	T26H5.8	71.9549	-1.78794	0.548865	-3.25753	0.00112388	0.00314375
WBGene00013853	ZC116.1	37.8549	-1.78743	0.796394	-2.24441	0.0248062	0.0497629
WBGene00003480	klf-3	360.401	-1.78641	0.253892	-7.03611	1.9768e-12	1.73859e-11
WBGene00017120	tctn-1	49.4838	-1.78613	0.646496	-2.76278	0.00573108	0.0136624
WBGene00021938	Y55F3BR.1	484.78	-1.7857	0.234925	-7.60115	2.93502e-14	3.0335e-13
WBGene00044728	Y53F4B.45	676.665	-1.7852	0.356165	-5.01229	5.37866e-07	2.58011e-06
WBGene00001731	grl-22	23.7908	-1.78433	0.845055	-2.11149	0.03473	0.0667513
WBGene00002218	klp-6	62.0343	-1.7834	0.484221	-3.68302	0.000230484	0.000736705
WBGene00019742	nhr-202	54.0582	-1.78256	0.658644	-2.70641	0.00680153	0.0158917
WBGene00195970	F52B10.6	21.5343	-1.78248	0.78287	-2.27686	0.0227946	0.0461772
WBGene00011076	scav-5	29.7123	-1.7812	0.775426	-2.29707	0.021615	0.0441003
WBGene00000761	coq-1	197.432	-1.78081	0.305799	-5.82347	5.76372e-09	3.54916e-08
WBGene00020222	fut-6	61.1849	-1.77892	0.535138	-3.32422	0.000886658	0.00253262
WBGene00016979	C56G2.4	554.019	-1.77773	0.243795	-7.29187	3.05672e-13	2.87766e-12
WBGene00021948	kvs-5	348.179	-1.77725	0.263465	-6.74568	1.52313e-11	1.23741e-10
WBGene00022244	Y73B6BL.23	43.3554	-1.77682	0.713592	-2.48996	0.0127757	0.027871
WBGene00011560	T07C4.3	916.799	-1.77654	0.204635	-8.68152	3.90502e-18	5.4051e-17
WBGene00003682	nhr-92	34.8621	-1.77528	0.651887	-2.72329	0.00646356	0.0151896
WBGene00020417	nuo-2	432.331	-1.7743	0.234261	-7.57403	3.6183e-14	3.69114e-13
WBGene00001188	egl-20	100.527	-1.77312	0.421416	-4.20751	2.58196e-05	9.6635e-05
WBGene00009920	abts-1	6095.05	-1.77195	0.157656	-11.2394	2.61244e-29	7.31157e-28
WBGene00001997	hpr-9	19.9897	-1.77146	0.832805	-2.1271	0.0334116	0.064553
WBGene00009097	fipr-2	17.4111	-1.77117	0.945184	-1.87389	0.060945	0.108723
WBGene00012812	Y43F8B.1	482.072	-1.76899	0.272939	-6.48125	9.09663e-11	6.82139e-10
WBGene00006747	unc-7	823.177	-1.76762	0.224668	-7.86771	3.61193e-15	4.07493e-14
WBGene00018348	F42C5.6	17.3784	-1.76738	0.969499	-1.82298	0.0683057	0.119897
WBGene00016983	C56G2.15	276.216	-1.7673	0.312464	-5.65602	1.54921e-08	8.9933e-08
WBGene00018176	F38B6.7	34.9594	-1.76719	0.64446	-2.74212	0.00610444	0.0144538
WBGene00009559	mtx-1	288.564	-1.76652	0.272381	-6.48548	8.84473e-11	6.65234e-10
WBGene00015354	snet-1	60.0376	-1.76602	0.606315	-2.91271	0.00358312	0.00895994
WBGene00016029	elf-1	1228.41	-1.76455	0.200933	-8.78178	1.60912e-18	2.29291e-17
WBGene00022862	ZK1236.1	141.205	-1.76424	0.405882	-4.3467	1.38203e-05	5.42794e-05
WBGene00000484	che-2	159.774	-1.7631	0.358985	-4.91135	9.045e-07	4.20095e-06
WBGene00004020	pho-1	154.905	-1.76259	0.396972	-4.44008	8.99262e-06	3.63406e-05
WBGene00015137	B0310.1	101.03	-1.76198	0.474335	-3.71463	0.000203499	0.0006568
WBGene00011928	cutl-12	50.7955	-1.76185	0.520965	-3.38189	0.000719901	0.00209924
WBGene00008047	lact-7	73.3647	-1.76066	0.712951	-2.46953	0.0135289	0.029331
WBGene00010793	LLC1.2	143.106	-1.7588	0.39581	-4.44354	8.84914e-06	3.58184e-05
WBGene00013325	Y57G11C.36	177.857	-1.75852	0.286041	-6.14781	7.85599e-10	5.33409e-09
WBGene00016711	fbxc-53	65.6876	-1.7579	0.45933	-3.82711	0.000129657	0.000432122
WBGene00019643	K11C4.2	229.497	-1.75736	0.279859	-6.27944	3.39803e-10	2.40329e-09
WBGene00004856	sma-2	89.2093	-1.75721	0.479974	-3.66106	0.000251178	0.000796972
WBGene00077703	K08E5.5	38.3765	-1.757	0.597072	-2.94269	0.00325374	0.00820815
WBGene00015471	lmp-2	95.4879	-1.75642	0.498292	-3.52489	0.00042366	0.00129174
WBGene00015148	hpo-28	311.799	-1.75633	0.297166	-5.91027	3.41551e-09	2.15709e-08
WBGene00002235	kqt-3	128.522	-1.75441	0.327215	-5.36164	8.24675e-08	4.37691e-07
WBGene00008956	nekl-3	96.197	-1.75364	0.390431	-4.49155	7.07061e-06	2.92026e-05
WBGene00001071	dpy-9	86.6136	-1.75359	0.393719	-4.45392	8.43154e-06	3.43048e-05
WBGene00000438	ceh-14	142.47	-1.75349	0.433882	-4.04141	5.31317e-05	0.000189167
WBGene00011502	vps-53	315.415	-1.75177	0.266598	-6.57083	5.00359e-11	3.84149e-10
WBGene00007592	C14H10.2	2929.31	-1.749	0.159833	-10.9427	7.20533e-28	1.88267e-26
WBGene00022623	ZC487.1	143.127	-1.74859	0.379656	-4.60573	4.11027e-06	1.75465e-05
WBGene00014989	best-23	186.427	-1.74847	0.363711	-4.80729	1.52989e-06	6.92388e-06
WBGene00000272	bro-1	115.245	-1.74835	0.393821	-4.43945	9.01891e-06	3.64351e-05
WBGene00001622	glt-4	43.6054	-1.74829	0.553273	-3.15991	0.00157818	0.00427562
WBGene00138720	F58H1.8	16.4021	-1.74691	0.829314	-2.10645	0.035165	0.0674636
WBGene00009852	arrd-24	12.4645	-1.74649	0.976485	-1.78855	0.0736868	0.127755
WBGene00003747	nlp-9	41.1323	-1.74602	0.692584	-2.52103	0.0117013	0.0257506
WBGene00006574	tin-13	105.964	-1.74568	0.369912	-4.71917	2.36807e-06	1.04318e-05
WBGene00199010	C04F1.4	17.3533	-1.74439	0.809731	-2.15428	0.0312181	0.0608575
WBGene00018641	F49E10.4	152.107	-1.7433	0.378954	-4.60031	4.21859e-06	1.79787e-05
WBGene00000765	coq-5	44.5587	-1.73962	0.572174	-3.04037	0.00236287	0.00615346
WBGene00001695	grd-6	150.822	-1.73922	0.408828	-4.25416	2.09839e-05	7.9796e-05
WBGene00196820	F46C8.11	24.3864	-1.73852	0.729877	-2.38194	0.0172218	0.0361342
WBGene00196852	C02F4.10	19.488	-1.73841	0.777933	-2.23465	0.0254406	0.0508893
WBGene00022130	Y71F9B.9	357.355	-1.73796	0.262425	-6.62267	3.52757e-11	2.75369e-10
WBGene00007604	xbx-9	57.6958	-1.73714	0.587109	-2.9588	0.00308838	0.00783504
WBGene00004091	pps-1	712.363	-1.73619	0.242684	-7.1541	8.4221e-13	7.67578e-12
WBGene00006306	sue-1	115.317	-1.73575	0.535491	-3.24142	0.00118936	0.00330926
WBGene00020399	ztf-4	258.81	-1.73436	0.292967	-5.92	3.21947e-09	2.04149e-08
WBGene00016005	ift-74	330.186	-1.73357	0.273161	-6.34635	2.20486e-10	1.59716e-09
WBGene00003909	pag-3	186.427	-1.7334	0.319209	-5.43028	5.62643e-08	3.04666e-07
WBGene00021732	Y49G5B.1	41.1158	-1.73331	0.560463	-3.09263	0.0019839	0.00526806
WBGene00009288	F31C3.6	701.855	-1.73058	0.191129	-9.05448	1.3722e-19	2.11605e-18
WBGene00000266	bre-1	2928.68	-1.73036	0.170847	-10.1281	4.14426e-24	8.58074e-23
WBGene00011801	T16G1.7	106.268	-1.72935	0.561068	-3.08224	0.00205448	0.0054348
WBGene00000631	col-54	98.4597	-1.72781	0.450515	-3.8352	0.000125462	0.000419141
WBGene00004241	puf-5	613.699	-1.72715	1.02865	-1.67904	0.0931448	0.15619
WBGene00001479	fmo-4	410.674	-1.72616	0.272228	-6.34086	2.28481e-10	1.65088e-09
WBGene00010774	K11E4.2	105.118	-1.72521	0.355328	-4.85527	1.20223e-06	5.50443e-06
WBGene00006774	unc-38	169.145	-1.7236	0.354993	-4.85532	1.20195e-06	5.50443e-06
WBGene00004447	rpl-33	3474.99	-1.72347	0.223976	-7.69488	1.41624e-14	1.51354e-13
WBGene00022012	Y59H11AR.4	41.2965	-1.72334	0.703343	-2.45021	0.0142772	0.0307833
WBGene00008910	F17C8.3	279.537	-1.72276	0.358129	-4.81044	1.50599e-06	6.81817e-06
WBGene00011251	glb-22	15.44	-1.72263	0.906652	-1.89999	0.0574344	0.103282
WBGene00015525	rha-2	568.357	-1.72087	0.26973	-6.37997	1.77126e-10	1.2905e-09
WBGene00004793	shw-3	104.372	-1.72003	0.385	-4.4676	7.91028e-06	3.23726e-05
WBGene00008229	C50F4.1	87.2709	-1.7195	0.419891	-4.09512	4.21949e-05	0.000152738
WBGene00012099	acc-4	90.777	-1.71924	0.443124	-3.87982	0.000104534	0.000354692
WBGene00219425	Y54G2A.73	21.0413	-1.71835	0.73061	-2.35194	0.018676	0.0388159
WBGene00018950	F56C9.6	66.2013	-1.71761	0.525388	-3.26923	0.00107841	0.00302735
WBGene00015176	vps-51	409.722	-1.71726	0.268792	-6.3888	1.6719e-10	1.22023e-09
WBGene00000537	clk-2	258.899	-1.71681	0.319002	-5.38183	7.37335e-08	3.93998e-07
WBGene00009226	cyp-37B1	155.474	-1.71672	0.352616	-4.86851	1.1244e-06	5.16501e-06
WBGene00010351	cbd-1	1973.54	-1.71659	1.02111	-1.6811	0.0927442	0.155662
WBGene00003966	pdl-1	682.051	-1.71624	0.242957	-7.06397	1.61811e-12	1.4372e-11
WBGene00003165	mec-1	483.992	-1.71547	0.248087	-6.91478	4.68583e-12	3.98994e-11
WBGene00020657	lgc-53	24.2131	-1.71447	0.719621	-2.38246	0.0171973	0.0361029
WBGene00002915	let-805	41187.4	-1.71344	0.171081	-10.0154	1.30458e-23	2.59841e-22
WBGene00008237	nstp-10	266.383	-1.71321	0.258424	-6.62946	3.36924e-11	2.64159e-10
WBGene00043049	F32H2.11	28.5355	-1.71304	0.655677	-2.61262	0.0089851	0.0203299
WBGene00016795	C49H3.12	14.848	-1.71261	0.9475	-1.8075	0.0706844	0.123364
WBGene00011612	T08D2.7	16.1317	-1.71178	0.884227	-1.93591	0.0528792	0.0959828
WBGene00000295	cat-1	50.3453	-1.71159	0.626797	-2.73069	0.00632024	0.0148918
WBGene00000915	hsp-90	26586.9	-1.71142	0.204848	-8.35458	6.56652e-17	8.34459e-16
WBGene00011238	ugt-59	57.8667	-1.7109	0.497922	-3.43609	0.000590179	0.00175186
WBGene00012696	reps-1	152.207	-1.7092	0.386786	-4.41898	9.91661e-06	3.98185e-05
WBGene00009482	F36G3.1	1618.57	-1.70879	0.22069	-7.74295	9.71372e-15	1.05334e-13
WBGene00009358	F33C8.4	10.4625	-1.70836	1.00347	-1.70245	0.0886713	0.149768
WBGene00004164	pqn-83	2599.78	-1.70798	0.186827	-9.14204	6.12833e-20	9.57971e-19
WBGene00219753	linc-152	97.2643	-1.70687	0.398828	-4.27971	1.87134e-05	7.17699e-05
WBGene00007252	mlt-2	175.1	-1.70647	0.403961	-4.22434	2.39647e-05	9.02841e-05
WBGene00009002	hint-1	176.312	-1.70623	0.397679	-4.29046	1.78302e-05	6.87181e-05
WBGene00020509	hex-1	144.933	-1.70617	0.328564	-5.19281	2.07139e-07	1.043e-06
WBGene00009386	tag-290	26.087	-1.70311	0.711978	-2.39208	0.0167533	0.0353401
WBGene00016846	C50F7.6	323.975	-1.70302	0.30142	-5.65	1.60449e-08	9.2842e-08
WBGene00271606	F22F4.9	27.1372	-1.70268	0.778621	-2.1868	0.0287575	0.0565963
WBGene00006067	sto-5	241.404	-1.70175	0.253716	-6.70728	1.98287e-11	1.59442e-10
WBGene00003248	mig-17	308.007	-1.70015	0.245506	-6.92509	4.35683e-12	3.72241e-11
WBGene00022719	pdhk-2	247.859	-1.6997	0.260549	-6.52353	6.86726e-11	5.2276e-10
WBGene00018639	tbc-16	185.739	-1.69861	0.316102	-5.37362	7.71727e-08	4.10865e-07
WBGene00006811	unc-79	1618.1	-1.69717	0.17697	-9.59016	8.79448e-22	1.55675e-20
WBGene00009917	glb-18	79.3505	-1.69495	0.496688	-3.4125	0.000643693	0.0018946
WBGene00009800	rrc-1	711.69	-1.69439	0.214895	-7.88472	3.15231e-15	3.57565e-14
WBGene00001616	glr-5	101.889	-1.69436	0.363423	-4.66222	3.12819e-06	1.3585e-05
WBGene00010758	vnut-1	272.542	-1.69269	0.268235	-6.31046	2.78214e-10	1.98445e-09
WBGene00013819	Y116F11A.6	127.901	-1.69131	0.366138	-4.61932	3.85005e-06	1.64976e-05
WBGene00011866	not found	114.693	-1.69014	0.421874	-4.00627	6.16852e-05	0.000217099
WBGene00013340	tcc-1	1063.69	-1.69014	0.240166	-7.03737	1.959e-12	1.72656e-11
WBGene00019955	R08C7.12	558.302	-1.68906	0.220571	-7.65766	1.89348e-14	1.99641e-13
WBGene00000378	cct-2	1567.83	-1.68704	0.209326	-8.05937	7.66866e-16	9.06312e-15
WBGene00019498	K07E8.7	41.3731	-1.68592	0.71749	-2.34974	0.0187864	0.0390196
WBGene00009138	F25H9.6	53.6898	-1.68582	0.615553	-2.73872	0.00616796	0.0145767
WBGene00006782	unc-46	29.76	-1.68455	0.821603	-2.05033	0.0403326	0.076134
WBGene00022519	ZC123.4	637.909	-1.68386	0.235645	-7.14573	8.95167e-13	8.12894e-12
WBGene00008571	prmn-1	1528.61	-1.68381	0.180039	-9.35248	8.56163e-21	1.4347e-19
WBGene00195159	T04C12.14	31.9405	-1.68356	0.602231	-2.79555	0.00518122	0.0124746
WBGene00001456	flp-13	81.0964	-1.68331	0.410994	-4.0957	4.20896e-05	0.000152445
WBGene00000540	cln-3.2	52.3627	-1.68291	0.543612	-3.09579	0.00196288	0.00521444
WBGene00021590	Y46D2A.2	33.1552	-1.68281	0.620877	-2.71038	0.00672054	0.0157288
WBGene00019196	H14A12.3	269.253	-1.68091	0.292045	-5.75566	8.63045e-09	5.20478e-08
WBGene00044605	ttr-36	1944.78	-1.68089	0.203029	-8.27904	1.24177e-16	1.54368e-15
WBGene00009850	F48F7.5	275.015	-1.68048	0.309738	-5.42548	5.77976e-08	3.12834e-07
WBGene00019108	chpf-2	143.049	-1.67948	0.329375	-5.09899	3.41467e-07	1.67377e-06
WBGene00019811	egg-2	54.3	-1.67933	0.745552	-2.25246	0.0242931	0.0488819
WBGene00077669	Y38H6A.5	36.1861	-1.67902	0.696575	-2.4104	0.015935	0.0338697
WBGene00000692	col-118	393.011	-1.67859	0.25141	-6.67672	2.44346e-11	1.93995e-10
WBGene00004859	sma-5	830.551	-1.67664	0.204122	-8.21394	2.14046e-16	2.6194e-15
WBGene00016066	acd-2	93.8108	-1.6765	0.539131	-3.10963	0.00187323	0.00500483
WBGene00015155	B0353.1	1587.94	-1.67574	0.17978	-9.32106	1.15189e-20	1.89737e-19
WBGene00013387	Y62F5A.9	172.858	-1.67426	0.317958	-5.26565	1.39698e-07	7.21925e-07
WBGene00019718	M01H9.2	55.7315	-1.67314	0.524333	-3.19099	0.00141786	0.00388822
WBGene00012261	lpr-3	11647.2	-1.67289	0.166853	-10.0261	1.1706e-23	2.34269e-22
WBGene00014008	ZK596.3	54.666	-1.67247	0.600843	-2.78354	0.00537688	0.0128988
WBGene00006764	unc-27	2117.57	-1.67085	0.219452	-7.61375	2.66263e-14	2.7679e-13
WBGene00004905	snf-6	203.362	-1.67018	0.323957	-5.15556	2.52873e-07	1.25617e-06
WBGene00012917	Y46G5A.29	63.2659	-1.67004	0.644425	-2.59152	0.00955517	0.0214752
WBGene00001184	egl-15	960.446	-1.66989	0.216769	-7.70355	1.32341e-14	1.41795e-13
WBGene00013193	Y54E2A.8	107.213	-1.66964	0.380164	-4.39188	1.12374e-05	4.47294e-05
WBGene00011869	dod-6	983.643	-1.66867	0.277742	-6.00797	1.87861e-09	1.22207e-08
WBGene00009319	mccc-1	299.685	-1.66819	0.294156	-5.67108	1.41897e-08	8.30241e-08
WBGene00000186	ark-1	3496.49	-1.6644	0.1944	-8.56171	1.11202e-17	1.48363e-16
WBGene00010592	K06A4.2	152.32	-1.66294	0.384655	-4.3232	1.53783e-05	5.98187e-05
WBGene00008078	vps-50	269.576	-1.66211	0.250795	-6.62736	3.41754e-11	2.67612e-10
WBGene00016282	C31B8.7	60.1525	-1.6601	0.525982	-3.1562	0.00159842	0.00432535
WBGene00007615	set-31	53.4459	-1.66006	0.631341	-2.62943	0.00855291	0.0194698
WBGene00020112	pfd-5	177.592	-1.65803	0.436461	-3.7988	0.000145398	0.000480804
WBGene00004445	rpl-31	924.06	-1.6571	0.187741	-8.82653	1.07973e-18	1.56698e-17
WBGene00000679	col-105	37.8616	-1.65703	0.629356	-2.6329	0.00846587	0.0192997
WBGene00011326	T01D3.1	2654.56	-1.65571	0.172645	-9.59025	8.78693e-22	1.55675e-20
WBGene00007720	C25D7.10	83.4943	-1.65547	0.455491	-3.63446	0.000278561	0.000877651
WBGene00008746	F13E6.2	125.671	-1.6553	0.501578	-3.30018	0.00096622	0.0027381
WBGene00013835	mlt-4	165.053	-1.65356	0.331093	-4.99423	5.90713e-07	2.81762e-06
WBGene00018048	clec-137	19.5126	-1.65316	0.759419	-2.17688	0.0294893	0.0578078
WBGene00003622	nhr-23	1054.66	-1.65295	0.196189	-8.42531	3.59801e-17	4.63792e-16
WBGene00012289	W05H12.1	737.28	-1.65292	0.247595	-6.6759	2.45716e-11	1.94836e-10
WBGene00008665	ercc-1	54.9676	-1.65273	0.556813	-2.9682	0.00299545	0.00762853
WBGene00016456	C35E7.4	1821.18	-1.65137	0.226309	-7.29698	2.94292e-13	2.78095e-12
WBGene00015076	B0238.12	17.8026	-1.65109	0.830655	-1.9877	0.0468449	0.0864913
WBGene00009058	F22E12.1	135.74	-1.65009	0.408782	-4.0366	5.42321e-05	0.000192703
WBGene00011003	R04B5.5	130.784	-1.64894	0.350683	-4.7021	2.57505e-06	1.12897e-05
WBGene00001368	exc-7	1809.4	-1.64855	0.178527	-9.23416	2.60319e-20	4.16245e-19
WBGene00013859	ZC247.1	28805.1	-1.6483	0.142479	-11.5687	5.93578e-31	1.79329e-29
WBGene00003697	nhr-107	33.3712	-1.64799	0.651497	-2.52955	0.0114209	0.0252041
WBGene00009059	chw-1	152.468	-1.64799	0.411833	-4.0016	6.29163e-05	0.000220998
WBGene00015619	C08G9.1	258.833	-1.64729	0.280004	-5.88311	4.02625e-09	2.52127e-08
WBGene00022789	lron-2	1103.92	-1.64722	0.213071	-7.73087	1.06818e-14	1.15334e-13
WBGene00007823	C30H6.5	81.8527	-1.64654	0.62542	-2.63269	0.00847104	0.0193079
WBGene00001503	fum-1	1803.51	-1.64616	0.171082	-9.62207	6.4522e-22	1.15515e-20
WBGene00010784	twk-48	18.3919	-1.6461	0.840468	-1.95855	0.0501657	0.0917733
WBGene00021200	cyp-31A3	55.7161	-1.64542	0.592399	-2.77755	0.00547698	0.0131064
WBGene00004223	ptr-9	26.3683	-1.64511	0.914608	-1.7987	0.0720657	0.125359
WBGene00219372	not found	115.644	-1.6433	0.414279	-3.96665	7.28894e-05	0.000253199
WBGene00015449	ugt-63	143.207	-1.63974	0.406939	-4.02944	5.59094e-05	0.000198326
WBGene00002163	ist-1	276.163	-1.63951	0.304889	-5.37741	7.55656e-08	4.02931e-07
WBGene00006462	svh-5	548.299	-1.6395	0.21616	-7.58465	3.33397e-14	3.41575e-13
WBGene00000656	col-80	21.7816	-1.63719	0.800831	-2.04437	0.040917	0.0771445
WBGene00006999	zyx-1	4768.36	-1.63719	0.19688	-8.31565	9.1248e-17	1.15141e-15
WBGene00004322	rcq-5	482.656	-1.63657	0.330901	-4.94579	7.58375e-07	3.55644e-06
WBGene00011891	del-6	104.156	-1.63588	0.380106	-4.30375	1.67928e-05	6.49992e-05
WBGene00000767	coq-8	352.965	-1.63537	0.386925	-4.22658	2.37273e-05	8.94704e-05
WBGene00008547	F07A11.4	2418.99	-1.63491	0.175037	-9.3404	9.59696e-21	1.60392e-19
WBGene00003370	mlc-2	4726.79	-1.63415	0.189787	-8.61045	7.27765e-18	9.89887e-17
WBGene00003865	oma-2	342.938	-1.63229	0.949701	-1.71875	0.0856608	0.145406
WBGene00014119	ZK858.6	2494.44	-1.63204	0.222818	-7.32455	2.39696e-13	2.27982e-12
WBGene00008144	gasr-8	77.501	-1.63063	0.515495	-3.16324	0.00156026	0.00423528
WBGene00007330	C05C10.3	246.345	-1.63024	0.267047	-6.10468	1.03006e-09	6.90812e-09
WBGene00009790	lgc-44	140.855	-1.62978	0.351793	-4.63277	3.60803e-06	1.55134e-05
WBGene00009710	F44G3.10	31.0359	-1.62975	0.754562	-2.15986	0.0307836	0.0600945
WBGene00018907	F55G1.15	40.9608	-1.62862	0.708572	-2.29845	0.0215361	0.0439535
WBGene00006513	rimb-1	1624.98	-1.62828	0.198901	-8.18639	2.69171e-16	3.27805e-15
WBGene00043994	C07A9.12	119.208	-1.62824	0.408399	-3.98689	6.69454e-05	0.000233844
WBGene00011185	R10D12.1	361.271	-1.62774	0.266379	-6.1106	9.92603e-10	6.66401e-09
WBGene00013436	Y66D12A.10	71.1206	-1.62761	0.524182	-3.10504	0.00190254	0.0050756
WBGene00006476	rhgf-2	6410.54	-1.62676	0.159279	-10.2133	1.72879e-24	3.70143e-23
WBGene00011404	T03F7.7	146.524	-1.62645	0.390671	-4.16322	3.13796e-05	0.000115892
WBGene00010756	K10G9.2	279.137	-1.62559	0.295063	-5.50929	3.60294e-08	1.99567e-07
WBGene00003420	msh-4	17.4911	-1.62365	0.899091	-1.80588	0.0709367	0.123686
WBGene00000407	cdk-5	134.969	-1.62304	0.420727	-3.85771	0.000114454	0.000385232
WBGene00022591	cuti-1	729.515	-1.62208	0.215001	-7.54453	4.53917e-14	4.57851e-13
WBGene00006752	unc-13	2057.2	-1.62175	0.217696	-7.44958	9.36364e-14	9.22275e-13
WBGene00009304	eva-1	970.103	-1.61893	0.196659	-8.23215	1.83887e-16	2.25693e-15
WBGene00020413	T10E9.3	145.335	-1.61858	0.442066	-3.66141	0.00025083	0.000796067
WBGene00007045	pgap-2	103.449	-1.61778	0.467657	-3.45932	0.000541532	0.00162047
WBGene00016734	C46H11.10	121.743	-1.6173	0.416929	-3.87908	0.000104852	0.000355485
WBGene00003029	lin-44	102.125	-1.61664	0.55742	-2.90021	0.00372907	0.00928979
WBGene00009191	F27D4.7	132.66	-1.61592	0.383634	-4.21213	2.52969e-05	9.4905e-05
WBGene00001187	egl-19	3952.53	-1.61567	0.171457	-9.4232	4.37548e-21	7.41118e-20
WBGene00010281	F58G11.3	122.15	-1.61417	0.425516	-3.79344	0.000148576	0.000489848
WBGene00009504	F37B12.1	44.7002	-1.61204	0.639371	-2.5213	0.0116923	0.0257353
WBGene00008482	cut-4	40.8076	-1.61121	0.552982	-2.91368	0.00357197	0.00893384
WBGene00013715	not found	115.906	-1.61114	0.451831	-3.5658	0.000362746	0.00112235
WBGene00018035	sek-4	39.8424	-1.6104	0.720729	-2.23441	0.025456	0.050912
WBGene00018538	marg-1	26.2884	-1.61	0.79942	-2.01396	0.0440139	0.0820722
WBGene00020028	R12C12.8	93.3488	-1.60928	0.395914	-4.06472	4.8091e-05	0.000172343
WBGene00017771	F25B4.8	43.6944	-1.60907	0.674018	-2.38728	0.0169734	0.0357203
WBGene00008890	ser-5	150.728	-1.60765	0.336406	-4.77888	1.76276e-06	7.91227e-06
WBGene00007554	pptr-2	682.851	-1.60743	0.202634	-7.93268	2.14462e-15	2.45478e-14
WBGene00011055	arrd-14	35.2344	-1.60733	0.693541	-2.31758	0.0204724	0.0420352
WBGene00020910	dgtr-1	50.3763	-1.60694	0.695603	-2.31014	0.0208802	0.0427778
WBGene00018249	F40H3.1	94.3554	-1.6063	0.43645	-3.68038	0.000232891	0.000742746
WBGene00005662	sars-2	129.786	-1.6055	0.472396	-3.39862	0.000677265	0.00198504
WBGene00016746	C48B6.10	2248.96	-1.60533	0.208562	-7.69715	1.39132e-14	1.48818e-13
WBGene00009305	metl-17	138.348	-1.60514	0.344477	-4.65964	3.16768e-06	1.37375e-05
WBGene00014955	Y102A5C.6	41.3317	-1.60504	0.756746	-2.12097	0.0339239	0.0654021
WBGene00044701	AH9.6	30.931	-1.60489	0.722155	-2.22236	0.0262592	0.0522996
WBGene00006705	ubc-8	203.118	-1.60476	0.312691	-5.13209	2.86536e-07	1.415e-06
WBGene00020740	T23F4.2	189.487	-1.60452	0.341237	-4.70207	2.57539e-06	1.12897e-05
WBGene00020506	dop-3	54.527	-1.60426	0.509049	-3.15148	0.00162444	0.00438771
WBGene00000065	act-3	5311.92	-1.6036	0.211132	-7.59525	3.07201e-14	3.16208e-13
WBGene00021328	npr-23	102.668	-1.60303	0.462734	-3.46425	0.000531706	0.00159448
WBGene00015199	B0454.8	31.4557	-1.60245	0.599436	-2.67326	0.0075118	0.0173322
WBGene00000935	daz-1	206.381	-1.6018	0.500795	-3.19852	0.00138134	0.00379717
WBGene00012124	T28D6.4	1355.57	-1.60149	0.177628	-9.01601	1.95063e-19	2.95725e-18
WBGene00008143	C47E8.4	283.272	-1.60088	0.300252	-5.33178	9.72563e-08	5.12932e-07
WBGene00007339	C05D12.1	180.566	-1.60051	0.389415	-4.11004	3.95586e-05	0.000143858
WBGene00008992	F21A3.2	29.9144	-1.59966	0.676798	-2.36357	0.0180996	0.0377366
WBGene00019609	K10B3.1	299.977	-1.5992	0.292025	-5.47625	4.34442e-08	2.38015e-07
WBGene00006760	unc-23	1601.81	-1.59904	0.171741	-9.31077	1.26908e-20	2.08495e-19
WBGene00012927	Y47D3A.14	31.6873	-1.59774	0.618666	-2.58255	0.00980722	0.0219631
WBGene00014148	ZK909.3	291.575	-1.59688	0.25625	-6.23173	4.61309e-10	3.22455e-09
WBGene00003564	ncs-2	3791.24	-1.59675	0.172884	-9.23593	2.56062e-20	4.0996e-19
WBGene00200511	R04B3.7	42.4733	-1.59659	0.573976	-2.78164	0.00540847	0.0129597
WBGene00016052	dod-3	21.4493	-1.5964	0.805717	-1.98134	0.0475529	0.0876183
WBGene00007285	C04A11.1	121.182	-1.5964	0.379313	-4.20865	2.56901e-05	9.62366e-05
WBGene00002252	lat-2	296.05	-1.59636	0.303328	-5.2628	1.41874e-07	7.31968e-07
WBGene00003565	ncs-3	17.2253	-1.5951	1.03555	-1.54035	0.123476	0.197964
WBGene00008783	F14B6.2	307.342	-1.59455	0.277879	-5.73828	9.56431e-09	5.71313e-08
WBGene00021465	ekl-7	87.6727	-1.59448	0.558866	-2.85307	0.00432991	0.0106286
WBGene00019932	R07C12.2	30.9831	-1.59381	0.686884	-2.32035	0.0203217	0.0417804
WBGene00001784	gst-36	232.089	-1.59335	0.368751	-4.32093	1.55372e-05	6.03808e-05
WBGene00009057	cept-1	114.191	-1.59084	0.419102	-3.79583	0.000147151	0.000486042
WBGene00013923	ghi-1	146.725	-1.59021	0.363896	-4.36997	1.24264e-05	4.90961e-05
WBGene00010703	K09A9.6	825.181	-1.58869	0.222542	-7.13883	9.41282e-13	8.53537e-12
WBGene00009241	F28H7.8	159.093	-1.58858	0.325882	-4.8747	1.08972e-06	5.01669e-06
WBGene00017397	F12A10.8	43.623	-1.58819	0.54494	-2.91443	0.00356336	0.00891406
WBGene00017637	F20D6.8	32.4018	-1.58788	0.684731	-2.31898	0.0203962	0.0419061
WBGene00012600	Y38E10A.22	175.396	-1.58715	0.289593	-5.48062	4.23835e-08	2.32711e-07
WBGene00018136	F37A4.6	60.4291	-1.58583	0.453431	-3.49741	0.000469807	0.00142347
WBGene00021528	gbb-1	338.437	-1.5855	0.290739	-5.45335	4.94283e-08	2.69507e-07
WBGene00003528	nas-9	15.5873	-1.58505	1.00055	-1.58419	0.113152	0.183994
WBGene00001248	elp-1	397.399	-1.58328	0.240065	-6.59524	4.2456e-11	3.28766e-10
WBGene00000041	aco-2	3998.2	-1.58305	0.186765	-8.47613	2.32805e-17	3.04147e-16
WBGene00001202	egl-36	13.256	-1.58284	0.982799	-1.61055	0.107278	0.175786
WBGene00010192	F57B7.2	177.533	-1.58071	0.396503	-3.98663	6.70182e-05	0.000234033
WBGene00011736	T12D8.9	2101.16	-1.57944	0.182892	-8.63594	5.82459e-18	7.99164e-17
WBGene00010644	K07G5.5	39.1494	-1.57941	0.767868	-2.05688	0.0396982	0.0751058
WBGene00000035	ace-1	282.504	-1.57912	0.256413	-6.15851	7.34316e-10	5.01025e-09
WBGene00008770	F13G3.12	28.0143	-1.57612	0.731615	-2.1543	0.0312163	0.0608575
WBGene00019905	R05G9.3	24.7446	-1.5756	0.78374	-2.01036	0.0443931	0.0826624
WBGene00194681	F40D4.16	34.5257	-1.57315	0.645232	-2.43811	0.0147644	0.031694
WBGene00022696	ift-139	338.443	-1.5731	0.241933	-6.50223	7.91401e-11	5.99691e-10
WBGene00002177	jkk-1	163.788	-1.57225	0.313742	-5.01129	5.40669e-07	2.59257e-06
WBGene00006957	wsp-1	2934.87	-1.57157	0.206893	-7.59607	3.05254e-14	3.1472e-13
WBGene00004044	plk-3	252.224	-1.57099	0.890836	-1.7635	0.0778163	0.133844
WBGene00010871	M05B5.3	45.8701	-1.57068	0.794855	-1.97606	0.0481477	0.0885584
WBGene00008377	D1054.10	87.3956	-1.57062	1.3978	-1.12364	0.261166	0.36515
WBGene00016735	fhod-1	9476.22	-1.5705	0.186775	-8.40849	4.15335e-17	5.33735e-16
WBGene00007885	ugt-21	127.129	-1.57024	0.390092	-4.0253	5.69026e-05	0.000201565
WBGene00006917	vha-8	6592.19	-1.56875	0.213619	-7.34369	2.07784e-13	1.98588e-12
WBGene00010670	tmed-1	254.151	-1.56874	0.320788	-4.89027	1.00696e-06	4.65272e-06
WBGene00020530	T15B12.1	487.017	-1.56838	0.293767	-5.33887	9.35265e-08	4.93984e-07
WBGene00169197	21ur-10296	303.534	-1.56743	0.268457	-5.83866	5.26215e-09	3.25466e-08
WBGene00009943	F52G2.3	30.1271	-1.5667	0.670686	-2.33597	0.019493	0.0403539
WBGene00007695	cest-9.2	109.673	-1.56642	0.448523	-3.4924	0.000478702	0.00144728
WBGene00009678	magu-4	1155.1	-1.56635	0.190852	-8.20715	2.26506e-16	2.7665e-15
WBGene00003701	nhr-111	21.0919	-1.56586	0.907995	-1.72452	0.0846141	0.14394
WBGene00011266	R13H4.8	130.632	-1.56156	0.466335	-3.34857	0.000812287	0.00233665
WBGene00011561	ttr-15	229.005	-1.5605	0.415168	-3.75873	0.000170778	0.000557781
WBGene00022038	Y65B4BL.6	61.9437	-1.56024	0.601939	-2.59202	0.00954143	0.0214482
WBGene00021311	thoc-5	300.928	-1.55864	0.251036	-6.20884	5.33784e-10	3.70641e-09
WBGene00044065	tag-229	34.0966	-1.55774	0.774891	-2.01027	0.0444028	0.0826624
WBGene00003402	mpk-2	98.4975	-1.55718	0.596026	-2.6126	0.00898573	0.0203299
WBGene00003548	nas-30	92.3074	-1.5567	0.55239	-2.81811	0.00483065	0.0117227
WBGene00001330	eps-8	10734.7	-1.55634	0.170389	-9.13402	6.60023e-20	1.02536e-18
WBGene00016556	math-21	32.793	-1.555	0.740017	-2.1013	0.0356144	0.0682423
WBGene00017814	F26A10.2	8287.56	-1.55493	0.192466	-8.07901	6.52958e-16	7.77119e-15
WBGene00198761	ZK377.7	20.5781	-1.55476	0.884344	-1.75809	0.0787319	0.135252
WBGene00020248	T05C1.1	100.203	-1.55315	0.457057	-3.39815	0.000678432	0.001988
WBGene00013043	arrd-16	24.7151	-1.55311	0.716439	-2.16782	0.0301726	0.0589934
WBGene00002016	hsp-16.2	573.836	-1.55119	0.216167	-7.17587	7.18495e-13	6.60091e-12
WBGene00015519	doxa-1	204.922	-1.55029	0.280833	-5.52034	3.38349e-08	1.88659e-07
WBGene00003760	nlp-22	23.05	-1.5494	0.817051	-1.89633	0.0579164	0.104029
WBGene00007605	hrg-7	204.045	-1.54925	0.336705	-4.60119	4.20086e-06	1.79092e-05
WBGene00018706	F52F10.2	60.9489	-1.5492	0.467331	-3.315	0.000916442	0.00260939
WBGene00006935	vars-1	270.559	-1.54616	0.269945	-5.72768	1.01815e-08	6.06452e-08
WBGene00021799	Y53G8AL.1	139.722	-1.54497	0.45298	-3.41068	0.000648009	0.00190596
WBGene00022413	Y102A11A.3	835.51	-1.54481	0.20639	-7.48492	7.15926e-14	7.09603e-13
WBGene00019890	R05F9.6	427.538	-1.54475	0.234771	-6.57982	4.71031e-11	3.63631e-10
WBGene00011768	oac-46	3112.62	-1.54449	0.204421	-7.55545	4.17428e-14	4.22063e-13
WBGene00016044	C24B5.1	61.0258	-1.54426	0.569928	-2.70957	0.00673695	0.0157584
WBGene00015650	pkg-2	736.759	-1.54303	0.234925	-6.56819	5.09315e-11	3.90547e-10
WBGene00014088	ZK809.8	32.1044	-1.54189	0.640639	-2.40679	0.0160933	0.0341542
WBGene00012155	VW02B12L.2	24.4967	-1.54148	0.736875	-2.09192	0.036446	0.0697082
WBGene00015580	cls-1	1117.06	-1.54068	0.184343	-8.35765	6.39789e-17	8.14678e-16
WBGene00013726	Y106G6H.16	17.5333	-1.54062	0.785083	-1.96237	0.0497198	0.0910504
WBGene00000401	cdh-9	1379.92	-1.54046	0.242864	-6.34289	2.25496e-10	1.63157e-09
WBGene00015163	B0361.9	223.326	-1.53968	0.285024	-5.40194	6.59251e-08	3.5499e-07
WBGene00020114	pde-4	1593.29	-1.53953	0.230568	-6.67714	2.43656e-11	1.93569e-10
WBGene00003756	nlp-18	28.5412	-1.53902	0.74761	-2.05858	0.0395343	0.0748406
WBGene00014214	ZK1073.2	115.34	-1.53893	0.357289	-4.30723	1.65315e-05	6.40271e-05
WBGene00007978	C36B1.11	75.093	-1.53892	0.492787	-3.1229	0.00179081	0.00480095
WBGene00010328	F59C6.11	114.934	-1.538	0.518401	-2.96682	0.00300895	0.00765672
WBGene00019983	sti-1	1626.84	-1.53646	0.200638	-7.65784	1.89082e-14	1.99528e-13
WBGene00010236	F58B4.3	104.996	-1.53517	0.499145	-3.07561	0.00210073	0.0055443
WBGene00016763	C49A9.9	122.927	-1.53408	0.471581	-3.25306	0.00114168	0.00318788
WBGene00017426	F13C5.5	170.165	-1.53402	0.308539	-4.97188	6.63081e-07	3.1366e-06
WBGene00018488	acs-1	308.157	-1.534	0.299746	-5.11767	3.09336e-07	1.52281e-06
WBGene00017835	F26F12.4	239.996	-1.53306	0.30141	-5.08628	3.65163e-07	1.78575e-06
WBGene00015684	C10G8.8	1241.95	-1.533	0.248357	-6.17256	6.71939e-10	4.60465e-09
WBGene00004131	pqn-44	3309.84	-1.53279	0.275785	-5.55792	2.73008e-08	1.53589e-07
WBGene00045412	C25F9.12	12.004	-1.53194	1.06145	-1.44326	0.148949	0.23091
WBGene00019448	frpr-13	48.6363	-1.53183	0.552583	-2.77213	0.00556905	0.0133064
WBGene00020230	nep-2	909.481	-1.53172	0.212647	-7.2031	5.88588e-13	5.43525e-12
WBGene00000552	cmd-1	5929.38	-1.53166	0.197002	-7.77484	7.55444e-15	8.27762e-14
WBGene00003969	pef-1	163.145	-1.53164	0.363151	-4.21764	2.46868e-05	9.27822e-05
WBGene00010117	nkb-3	1305.41	-1.53053	0.204419	-7.4872	7.0357e-14	6.98457e-13
WBGene00010665	K08E3.5	2303.04	-1.52648	0.175041	-8.72071	2.76455e-18	3.86484e-17
WBGene00010567	K04G2.9	346.685	-1.52603	0.265904	-5.73905	9.52091e-09	5.69261e-08
WBGene00012272	dhc-4	203.898	-1.52551	0.480844	-3.17257	0.00151097	0.00411481
WBGene00004008	pgp-14	176.881	-1.52489	0.460867	-3.30874	0.000937183	0.00266422
WBGene00019986	R09F10.1	44.9149	-1.52462	0.510049	-2.98916	0.0027975	0.0071709
WBGene00009436	marb-1	170.35	-1.52361	0.305447	-4.98812	6.09689e-07	2.89591e-06
WBGene00001548	gcy-23	79.2002	-1.52051	0.416873	-3.64743	0.000264877	0.00083763
WBGene00004395	rol-3	649.93	-1.52051	0.27213	-5.58742	2.30472e-08	1.30653e-07
WBGene00017015	D1014.2	46.22	-1.52004	0.684944	-2.21922	0.0264716	0.0526833
WBGene00001555	gcy-35	51.837	-1.52003	0.667205	-2.2782	0.0227147	0.0460375
WBGene00017194	F07C3.3	29.6201	-1.51951	0.685772	-2.21577	0.0267075	0.0530855
WBGene00015916	ttc-4	56.7037	-1.51887	0.480792	-3.1591	0.00158258	0.00428661
WBGene00019873	arrd-26	26.4786	-1.51862	0.718923	-2.11236	0.0346558	0.0666597
WBGene00007267	C03A3.2	459.381	-1.51861	0.268375	-5.65855	1.52655e-08	8.88224e-08
WBGene00002189	kin-1	1773.46	-1.51859	0.217261	-6.98968	2.75508e-12	2.39957e-11
WBGene00045168	srpr-1.2	187.529	-1.51845	0.428419	-3.54431	0.000393647	0.00120815
WBGene00007071	AC3.5	68.3901	-1.51835	0.528472	-2.8731	0.00406467	0.0100462
WBGene00010457	K01C8.2	131.334	-1.51691	0.494754	-3.066	0.00216945	0.00570531
WBGene00013289	tag-273	5661.03	-1.51644	0.154782	-9.79726	1.15677e-22	2.17965e-21
WBGene00001488	frm-1	10653.4	-1.51639	0.188547	-8.04252	8.80085e-16	1.03373e-14
WBGene00012933	mib-1	100.118	-1.51615	0.392977	-3.85811	0.000114267	0.000384811
WBGene00017070	praf-3	222.563	-1.516	0.402449	-3.76693	0.000165265	0.000541605
WBGene00008311	rskn-2	1204.37	-1.514	0.216914	-6.97974	2.95719e-12	2.56671e-11
WBGene00002190	kin-2	10682.7	-1.51338	0.197775	-7.65201	1.97866e-14	2.08099e-13
WBGene00007414	C07E3.3	443.188	-1.51296	0.244589	-6.18574	6.18135e-10	4.25683e-09
WBGene00001167	eef-2	32514.3	-1.51186	0.150046	-10.0759	7.05788e-24	1.43999e-22
WBGene00017290	F09E5.12	66.2351	-1.50963	0.488174	-3.0924	0.00198545	0.00526923
WBGene00017568	F18E9.1	113.47	-1.50784	0.446276	-3.37872	0.000728233	0.00212058
WBGene00020421	T10E10.4	192.884	-1.50728	0.353273	-4.26661	1.98465e-05	7.57919e-05
WBGene00015102	cpg-2	1587.48	-1.50726	1.21447	-1.24109	0.214574	0.311369
WBGene00018510	F46F11.7	165.818	-1.50596	0.33619	-4.47949	7.48227e-06	3.07612e-05
WBGene00077732	szy-4	106.298	-1.50474	0.565539	-2.66072	0.00779735	0.0179154
WBGene00022455	tyms-1	52.8621	-1.50433	0.529321	-2.84199	0.00448325	0.0109686
WBGene00016174	mfsd-13.2	100.065	-1.50283	0.377363	-3.98245	6.82097e-05	0.000237863
WBGene00021533	Y42G9A.3	260.317	-1.50248	0.314098	-4.78347	1.72299e-06	7.74204e-06
WBGene00021596	spsb-2	62.3365	-1.50188	0.656919	-2.28626	0.0222393	0.0451906
WBGene00001366	exc-5	986.877	-1.50183	0.242992	-6.18058	6.38658e-10	4.38855e-09
WBGene00018462	F45E1.1	272.638	-1.50166	0.376577	-3.98766	6.67269e-05	0.000233275
WBGene00007525	C11G10.1	16.1094	-1.49895	0.868059	-1.72678	0.0842073	0.143306
WBGene00010677	gtbp-1	895.474	-1.49854	0.193102	-7.76034	8.47039e-15	9.22495e-14
WBGene00020500	T14B4.3	62.4437	-1.49796	0.437903	-3.42077	0.00062444	0.00184484
WBGene00020100	mks-1	106.698	-1.49782	0.352155	-4.25329	2.10649e-05	8.00797e-05
WBGene00011963	T23G5.3	83.8154	-1.49693	0.482825	-3.10035	0.00193293	0.00514465
WBGene00016627	C44B7.5	75.6029	-1.4964	0.608333	-2.45985	0.0138997	0.0300622
WBGene00014125	ZK863.8	40.5464	-1.49624	0.821925	-1.82041	0.0686959	0.120498
WBGene00000528	clh-1	522.528	-1.49547	0.230159	-6.49757	8.16256e-11	6.1688e-10
WBGene00043068	F32E10.9	8.34378	-1.49502	1.15936	-1.28952	0.197216	0.290579
WBGene00018734	F53A10.2	1550	-1.49498	0.187235	-7.98448	1.41111e-15	1.63605e-14
WBGene00006924	vig-1	5458.23	-1.49314	0.182576	-8.17816	2.88212e-16	3.50654e-15
WBGene00018576	F47G3.1	52.7001	-1.49302	0.664839	-2.24569	0.0247237	0.0496053
WBGene00015141	ugt-46	207.409	-1.49264	0.297401	-5.01896	5.19525e-07	2.49881e-06
WBGene00008570	kcnl-2	157.478	-1.49246	0.370485	-4.0284	5.61568e-05	0.000199148
WBGene00013916	ZC504.1	43.069	-1.49212	0.720614	-2.07062	0.0383943	0.0729572
WBGene00019988	R09F10.5	121.464	-1.4921	0.380285	-3.92364	8.72213e-05	0.00029918
WBGene00008146	C47E8.9	24.1456	-1.49179	0.795682	-1.87486	0.0608121	0.108502
WBGene00004440	rpl-26	2123.7	-1.48927	0.164546	-9.05081	1.41917e-19	2.18312e-18
WBGene00015504	simr-1	216.744	-1.48808	0.342996	-4.33848	1.43473e-05	5.62084e-05
WBGene00021771	spe-48	119.79	-1.48668	0.395096	-3.76283	0.000168	0.000549849
WBGene00007969	acs-19	1710.15	-1.48598	0.165942	-8.95485	3.4019e-19	5.07178e-18
WBGene00003600	nhr-1	1359.1	-1.48556	0.203426	-7.30271	2.82026e-13	2.66906e-12
WBGene00022205	Y73B3A.3	50.7359	-1.48551	0.585491	-2.53721	0.011174	0.0246983
WBGene00006792	unc-58	152.364	-1.48542	0.31764	-4.67641	2.91934e-06	1.27309e-05
WBGene00021952	vha-19	1753.27	-1.48537	0.168969	-8.79083	1.48456e-18	2.12505e-17
WBGene00021342	Y35H6.3	72.3037	-1.4851	0.494732	-3.00182	0.00268372	0.00692153
WBGene00001858	hil-7	2894.19	-1.48428	0.247681	-5.9927	2.06381e-09	1.33829e-08
WBGene00011696	eea-1	2908.82	-1.48309	0.168149	-8.82009	1.14367e-18	1.65595e-17
WBGene00020136	nlp-45	11.7789	-1.48291	1.01126	-1.46639	0.142541	0.222596
WBGene00007717	C25D7.5	30.8133	-1.48268	0.79157	-1.87309	0.0610563	0.108845
WBGene00008944	F19B2.5	420.494	-1.4813	0.267678	-5.53389	3.13204e-08	1.75182e-07
WBGene00235279	Y67D8C.22	23.6313	-1.48127	0.819234	-1.80812	0.0705882	0.123233
WBGene00012450	Y17D7B.2	10.0563	-1.47918	1.11663	-1.32468	0.185277	0.276342
WBGene00019347	mbl-1	630.42	-1.47914	0.269104	-5.49656	3.87278e-08	2.13666e-07
WBGene00010781	K11H3.4	60.546	-1.47892	0.67451	-2.19258	0.0283379	0.0558756
WBGene00011551	T06G6.12	55.6162	-1.47827	0.501883	-2.94544	0.00322493	0.00814201
WBGene00007689	C18E9.9	436.786	-1.4771	0.229571	-6.43419	1.24131e-10	9.19856e-10
WBGene00018085	ttr-20	116.026	-1.47678	0.350508	-4.21325	2.51726e-05	9.44666e-05
WBGene00000067	act-5	6909.1	-1.47673	0.181688	-8.12782	4.3709e-16	5.26687e-15
WBGene00018797	ept-1	798.029	-1.47528	0.211831	-6.96441	3.29779e-12	2.84076e-11
WBGene00015088	B0252.3	24.2633	-1.47433	0.85564	-1.72308	0.0848745	0.144316
WBGene00007710	rsa-1	79.4413	-1.47294	0.453439	-3.24837	0.00116069	0.00323809
WBGene00012019	dkf-2	978.776	-1.47215	0.198945	-7.3998	1.36387e-13	1.31957e-12
WBGene00016113	eif-2D	158.101	-1.46966	0.367903	-3.99471	6.47739e-05	0.000226953
WBGene00020579	T19D12.4	598.516	-1.46926	0.268421	-5.47369	4.40757e-08	2.41304e-07
WBGene00010416	hxk-2	476.552	-1.46842	0.234862	-6.25229	4.04487e-10	2.84476e-09
WBGene00009968	fig-1	285.79	-1.46801	0.293528	-5.00126	5.69581e-07	2.72497e-06
WBGene00016903	2020-03-04	339.188	-1.46703	0.241081	-6.08522	1.16335e-09	7.75237e-09
WBGene00017923	F29B9.8	882.938	-1.46628	0.192352	-7.62292	2.48008e-14	2.58455e-13
WBGene00009336	F32D8.14	431.133	-1.46593	0.232952	-6.29282	3.1176e-10	2.21242e-09
WBGene00002983	lgx-1	5227.39	-1.46584	0.17409	-8.42	3.76495e-17	4.84815e-16
WBGene00000524	clc-3	66.7013	-1.46552	0.468921	-3.12531	0.00177618	0.0047658
WBGene00022048	fln-1	7933.78	-1.46485	0.146173	-10.0213	1.22859e-23	2.45095e-22
WBGene00012439	Y12A6A.1	61.3368	-1.4644	0.459131	-3.18951	0.00142515	0.00390309
WBGene00009601	F40G12.6	23.7133	-1.46392	0.774791	-1.88944	0.0588327	0.105479
WBGene00020068	cra-1	242.101	-1.46379	0.296412	-4.93835	7.87848e-07	3.6864e-06
WBGene00199797	C54G7.14	20.5472	-1.46229	0.828469	-1.76505	0.0775552	0.133468
WBGene00019663	K11H12.7	159.312	-1.46223	0.374891	-3.90041	9.60315e-05	0.000327701
WBGene00000623	col-46	33.9826	-1.46148	0.646991	-2.25888	0.0238908	0.0482006
WBGene00018300	F41G3.3	219.186	-1.46038	0.283055	-5.15934	2.47817e-07	1.23251e-06
WBGene00003759	nlp-21	62.6165	-1.45997	0.533206	-2.7381	0.00617946	0.0145984
WBGene00004854	slt-1	3497.99	-1.45851	0.165648	-8.80487	1.31e-18	1.88592e-17
WBGene00000718	col-145	35.0801	-1.4583	0.686066	-2.12559	0.0335371	0.0647556
WBGene00020058	R13D11.4	81.2344	-1.45811	0.395279	-3.68882	0.000225294	0.000721584
WBGene00008963	F19H8.2	53.9331	-1.45687	0.539751	-2.69916	0.00695141	0.0161998
WBGene00016380	ntp-1	400.615	-1.45548	0.255407	-5.69869	1.20731e-08	7.12707e-08
WBGene00021975	Y58A7A.1	104.978	-1.45508	0.456198	-3.18959	0.00142477	0.0039029
WBGene00006504	kcc-1	1910.07	-1.45497	0.188835	-7.70501	1.30837e-14	1.40304e-13
WBGene00011291	R102.4	354.809	-1.45423	0.269029	-5.40549	6.46323e-08	3.48327e-07
WBGene00000183	arf-3	5835.5	-1.45358	0.196539	-7.39587	1.40485e-13	1.35713e-12
WBGene00020854	T27C4.1	1173.89	-1.45335	0.277905	-5.22968	1.698e-07	8.65387e-07
WBGene00015538	sams-3	132.462	-1.45318	0.392241	-3.70481	0.000211553	0.000681044
WBGene00022396	Y97E10AR.1	3282.13	-1.45223	0.189088	-7.68016	1.58895e-14	1.68807e-13
WBGene00015092	mrpl-47	231.039	-1.45164	0.332854	-4.36119	1.29358e-05	5.10127e-05
WBGene00000908	daf-12	437.696	-1.44889	0.254307	-5.69739	1.21653e-08	7.17475e-08
WBGene00020855	hpo-36	1015.69	-1.44828	0.206594	-7.0103	2.37814e-12	2.07848e-11
WBGene00014016	ZK632.9	106.15	-1.4475	0.352618	-4.10501	4.04298e-05	0.000146814
WBGene00271812	F58F12.12	22.4965	-1.44714	0.835857	-1.73133	0.0833929	0.142151
WBGene00020736	T23F2.3	36.786	-1.44674	0.688213	-2.10218	0.0355378	0.0681061
WBGene00002265	lec-2	4966.69	-1.44588	0.240214	-6.01914	1.75346e-09	1.14659e-08
WBGene00015293	C01C4.3	130.991	-1.44527	0.328505	-4.39953	1.08484e-05	4.33245e-05
WBGene00017798	slc-17.8	154.334	-1.44454	0.356549	-4.05144	5.09027e-05	0.000181694
WBGene00249817	F42G8.19	54.2858	-1.44178	0.472917	-3.04869	0.0022984	0.00600797
WBGene00011131	R07H5.11	45.7227	-1.44104	0.562066	-2.56383	0.0103524	0.0230649
WBGene00003026	lin-41	640.217	-1.44059	0.250804	-5.74389	9.25269e-09	5.5404e-08
WBGene00011207	R10E8.1	130.749	-1.43778	0.409191	-3.51372	0.000441883	0.00134437
WBGene00002024	hsp-43	367.191	-1.43767	0.327251	-4.39318	1.11706e-05	4.45266e-05
WBGene00022664	ZK121.2	119.165	-1.43747	0.433517	-3.31584	0.000913673	0.00260268
WBGene00006538	tbb-4	1115.73	-1.43718	0.216361	-6.64253	3.08341e-11	2.42961e-10
WBGene00219901	F18A1.11	11.5895	-1.43689	1.01211	-1.4197	0.155696	0.23942
WBGene00008559	F07H5.8	332.197	-1.43634	0.277477	-5.17645	2.26151e-07	1.13148e-06
WBGene00015954	C18B2.3	207.498	-1.4349	0.344052	-4.17059	3.03808e-05	0.000112335
WBGene00004094	ppw-2	305.506	-1.43429	0.329403	-4.3542	1.33554e-05	5.25517e-05
WBGene00000055	acr-16	62.7234	-1.43402	0.478844	-2.99476	0.00274663	0.00706068
WBGene00046712	21ur-1004	8.22948	-1.43313	1.28901	-1.11181	0.26622	0.370567
WBGene00008711	F11E6.8	496.305	-1.43288	0.309646	-4.62748	3.70138e-06	1.58931e-05
WBGene00003980	pes-7	1371.85	-1.43259	0.204977	-6.98904	2.76777e-12	2.40896e-11
WBGene00046143	21ur-4973	14.9499	-1.43214	0.970547	-1.4756	0.140051	0.219472
WBGene00009888	F49E2.5	6137.76	-1.43212	0.239237	-5.98621	2.1479e-09	1.39077e-08
WBGene00006704	ubc-7	1189.67	-1.43173	0.283419	-5.05165	4.38003e-07	2.12541e-06
WBGene00003472	mtk-1	1164.53	-1.43058	0.199874	-7.1574	8.22196e-13	7.5097e-12
WBGene00022093	Y69A2AR.22	14.2523	-1.43035	0.880461	-1.62455	0.104258	0.171608
WBGene00007637	dhhc-7	1206.33	-1.42961	0.220281	-6.48994	8.58719e-11	6.46638e-10
WBGene00010917	M110.9	24.6644	-1.42958	0.718805	-1.98882	0.0467207	0.0863
WBGene00000082	adt-1	509.498	-1.42945	0.260995	-5.47691	4.3282e-08	2.3723e-07
WBGene00015311	C01G5.9	83.3546	-1.42942	0.45767	-3.12325	0.00178867	0.00479726
WBGene00004062	pmp-5	82.5781	-1.42727	0.441396	-3.23355	0.00122263	0.00339281
WBGene00011436	T04F3.1	1216.04	-1.42589	0.245767	-5.80181	6.56047e-09	4.01617e-08
WBGene00009048	cth-1	748.087	-1.42526	0.272822	-5.22412	1.74982e-07	8.90353e-07
WBGene00020029	R12C12.9	89.0352	-1.42499	0.576651	-2.47115	0.0134681	0.0292091
WBGene00012777	lact-8	501.977	-1.42387	0.249932	-5.69701	1.21927e-08	7.18417e-08
WBGene00002183	kat-1	158.496	-1.42366	0.357335	-3.9841	6.77371e-05	0.000236412
WBGene00007142	ttr-18	101.031	-1.42345	0.482539	-2.94992	0.00317857	0.00803788
WBGene00004719	sad-1	866.102	-1.42232	0.208727	-6.81424	9.4763e-12	7.84056e-11
WBGene00001386	far-2	629.926	-1.4204	0.729033	-1.94833	0.0513751	0.0936089
WBGene00007907	C34B4.2	338.926	-1.4194	0.246888	-5.74917	8.96844e-09	5.39566e-08
WBGene00010661	tyr-2	260.366	-1.41937	0.789907	-1.79689	0.0723533	0.125786
WBGene00003168	mec-4	47.4151	-1.4185	0.494475	-2.8687	0.0041216	0.0101729
WBGene00219565	linc-120	34.851	-1.41824	0.609609	-2.32648	0.0199931	0.0412127
WBGene00011827	T19A6.1	527.364	-1.4177	0.279189	-5.07793	3.81576e-07	1.86311e-06
WBGene00016636	perm-2	130.624	-1.41745	1.28103	-1.10649	0.268516	0.373102
WBGene00015287	osta-1	19.7584	-1.41652	0.930464	-1.52238	0.127914	0.203807
WBGene00016059	hir-1	770.861	-1.41636	0.189453	-7.47606	7.65843e-14	7.57883e-13
WBGene00001676	gpa-14	16.612	-1.4163	0.849703	-1.66681	0.0955519	0.159545
WBGene00010069	F54F11.1	158.821	-1.41628	0.338872	-4.1794	2.9228e-05	0.000108487
WBGene00009430	F35E12.6	51.5227	-1.41622	0.628642	-2.25283	0.0242701	0.0488434
WBGene00009276	F30F8.9	298.108	-1.41617	0.281706	-5.02711	4.97936e-07	2.40048e-06
WBGene00010941	gss-1	451.204	-1.416	0.262204	-5.4004	6.64938e-08	3.57746e-07
WBGene00000068	acy-1	1544.95	-1.41212	0.171114	-8.2525	1.55115e-16	1.91126e-15
WBGene00017314	lgc-39	284.064	-1.41158	0.266555	-5.29565	1.18597e-07	6.17962e-07
WBGene00006424	ctbp-1	774.621	-1.41093	0.186621	-7.56043	4.0174e-14	4.0817e-13
WBGene00021059	atat-2	164.506	-1.41032	0.309483	-4.55702	5.18836e-06	2.18817e-05
WBGene00006759	unc-22	12178.2	-1.4102	0.219694	-6.41894	1.37226e-10	1.01094e-09
WBGene00003471	mtd-1	18.32	-1.4095	0.874403	-1.61196	0.106971	0.175305
WBGene00011282	R74.8	512.885	-1.40502	0.311626	-4.50867	6.52352e-06	2.71303e-05
WBGene00010302	not found	2292.04	-1.40445	0.187705	-7.48224	7.30646e-14	7.23622e-13
WBGene00018299	F41G3.2	152.865	-1.40421	0.334078	-4.20324	2.63123e-05	9.83033e-05
WBGene00001752	gst-4	131.57	-1.40265	0.351388	-3.99173	6.55923e-05	0.000229468
WBGene00022865	ufbp-1	209.519	-1.40259	0.293327	-4.78167	1.73842e-06	7.80859e-06
WBGene00012610	Y38F1A.8	65.2945	-1.40121	0.715242	-1.95907	0.0501052	0.0916759
WBGene00000942	deb-1	18262.2	-1.4006	0.160577	-8.72231	2.72595e-18	3.81511e-17
WBGene00007176	kcnl-1	111.456	-1.40052	0.536681	-2.6096	0.00906477	0.0204792
WBGene00019518	K08B5.1	99.9569	-1.3997	0.510717	-2.74065	0.00613171	0.0144997
WBGene00016951	C55C3.1	40.8812	-1.39955	0.520546	-2.68862	0.00717484	0.0166525
WBGene00022549	ZC196.5	35.6452	-1.39883	0.620749	-2.25346	0.0242303	0.048771
WBGene00012921	Y46G5A.36	21.6552	-1.39872	0.763205	-1.83269	0.066849	0.117686
WBGene00007391	C06H2.7	20.7297	-1.39861	0.806117	-1.73499	0.0827424	0.141206
WBGene00004190	pars-2	159.686	-1.39825	0.319819	-4.37199	1.23118e-05	4.86895e-05
WBGene00002123	inx-1	1061.63	-1.39775	0.220619	-6.33557	2.36465e-10	1.70407e-09
WBGene00020087	R119.1	34.4791	-1.39766	0.699184	-1.99899	0.0456092	0.0845952
WBGene00020027	R12C12.7	196.131	-1.39745	0.360425	-3.87723	0.000105655	0.000357915
WBGene00004883	smg-5	35.442	-1.3971	0.579088	-2.41258	0.0158402	0.0337024
WBGene00004409	rla-1	3090.94	-1.39605	0.217653	-6.41409	1.41663e-10	1.04118e-09
WBGene00013784	Y116A8C.3	23.6864	-1.39568	0.724024	-1.92767	0.0538957	0.0975463
[truncated: 10,572 more rows]

## Sheet: both up(log2FC>2)
WormBase ID	Public Name	baseMean-hda-1RNAi vs. WT	log2FC-hda-1RNAi vs. WT	padj-hda-1RNAi vs. WT	baseMean-lin-53RNAi vs. WT	log2FC-lin-53RNAi vs. WT	padj-lin-53RNAi vs. WT
WBGene00000023	abt-5	112.271	3.31917	1.94808e-15	59.9244	2.70467	4.2779e-06
WBGene00000056	acr-17	63.8653	2.98755	8.53615e-07	173.396	4.90437	6.2467e-25
WBGene00000083	adt-2	1404.94	3.26135	3.06406e-52	550.709	2.1086	2.16519e-17
WBGene00000535	cpi-1	93.4201	2.52555	1.00677e-08	68.7304	2.4237	7.65775e-07
WBGene00000659	col-84	18.973	2.00672	0.0165352	22.9682	2.75958	0.00105443
WBGene00000660	col-85	94.6442	5.07515	7.67693e-18	38.9699	4.09111	1.00452e-08
WBGene00001170	egl-1	26.72	2.4976	0.000877707	16.7109	2.11822	0.0309044
WBGene00001395	fat-3	1988.85	3.60086	9.82565e-86	1264.24	3.27707	1.81299e-68
WBGene00001414	fer-1	239.622	3.9696	1.79876e-28	132.844	3.45317	3.88602e-15
WBGene00001437	fkh-5	62.5683	2.66801	0.000209483	73.1335	3.33306	4.00402e-07
WBGene00001438	fkh-6	28.4826	2.36238	0.00138405	22.5279	2.37682	0.015809
WBGene00001480	fmo-5	402.996	2.1583	1.40228e-19	293.064	2.03348	1.15726e-13
WBGene00001546	gcy-21	472.467	3.33389	7.28168e-22	217.746	2.47892	2.87174e-10
WBGene00001569	meg-3	1189.46	2.17808	1.2133e-15	1064.35	2.4203	2.63729e-16
WBGene00001671	gpa-9	104.41	2.00295	6.04342e-07	97.453	2.31437	6.32635e-06
WBGene00001687	gpn-1	88.147	2.27239	5.77944e-05	88.5846	2.70765	1.98388e-06
WBGene00001696	grd-7	12.5698	2.11698	0.0344016	13.2371	2.63152	0.0163248
WBGene00001842	her-1	261.705	4.02434	5.62946e-33	60.8391	2.06376	4.8521e-05
WBGene00001852	hil-1	368.843	4.27457	1.78496e-31	247.437	4.04455	7.5958e-24
WBGene00001906	his-32	924.877	2.20911	5.5032e-22	1296.78	3.18937	8.93706e-58
WBGene00002063	ife-5	48.7788	2.90934	4.04431e-07	31.2221	2.59575	0.00026828
WBGene00002113	ins-30	360.018	4.5396	2.84494e-07	60.9888	2.08561	0.00146137
WBGene00003107	mab-10	286.437	4.56838	7.52618e-29	119.807	3.61603	1.6041e-13
WBGene00003219	mes-1	321.984	2.69262	6.58306e-25	330.779	3.14046	1.99635e-29
WBGene00003387	mod-5	65.817	2.36021	1.34633e-06	42.9559	2.0331	0.00109738
WBGene00003414	mrp-8	136.582	2.72275	4.23514e-11	74.0165	2.08312	9.57192e-05
WBGene00003606	nhr-7	232.033	2.75992	4.06787e-21	175.794	2.71141	3.2102e-17
WBGene00003807	npr-1	19.4562	2.14237	0.0206535	17.1246	2.37062	0.0232016
WBGene00003840	ocr-3	49.2896	3.04784	1.10319e-07	28.3507	2.56804	0.00104099
WBGene00003845	odd-1	50.2224	2.18483	0.000124284	89.9605	3.54641	1.02011e-12
WBGene00004002	pgp-8	54.18	2.72428	2.54306e-06	151.354	4.73885	9.74609e-26
WBGene00004259	pyr-1	6263.34	2.3573	7.71454e-40	5181.37	2.45853	1.39858e-56
WBGene00004352	rgs-9	118.001	2.65843	3.64163e-10	76.3209	2.3437	1.10751e-06
WBGene00004509	rrf-2	2170.15	3.44209	2.17932e-78	2408.95	3.9912	8.30729e-104
WBGene00004815	skr-9	33.0591	2.82455	5.85934e-05	46.7587	3.7697	1.76204e-08
WBGene00004819	skr-13	55.4992	2.1536	0.000279382	90.1819	3.37759	1.02261e-13
WBGene00004976	spe-41	135.24	4.10208	3.40623e-24	43.5875	2.72109	1.4177e-05
WBGene00005427	srh-217	88.4327	4.88506	1.15659e-19	32.4642	3.72369	2.3265e-05
WBGene00005597	srj-9	23.5572	2.64315	0.000285784	16.8991	2.49453	0.0117267
WBGene00005657	srr-6	62.3007	2.07889	1.22819e-05	116.616	3.52132	2.09064e-17
WBGene00005829	srw-82	267.583	7.284	7.77938e-40	70.7878	5.70687	2.68154e-17
WBGene00005898	srx-7	42.7489	3.69801	1.4385e-06	20.1863	2.86926	0.00952075
WBGene00006650	tts-1	490.889	2.90768	1.78585e-18	452.85	3.18082	1.01457e-17
WBGene00006656	twk-1	32.117	2.07463	0.0162901	29.8802	2.37058	0.00762436
WBGene00006981	zig-4	492.523	2.67113	1.93264e-33	403.454	2.75308	1.5001e-32
WBGene00007097	B0024.4	135.949	3.42369	6.54399e-17	103.242	3.37393	5.12178e-12
WBGene00007132	pals-27	289.184	4.14013	1.44366e-27	112.537	3.04927	7.62343e-14
WBGene00007181	B0462.1	18.3351	2.30171	0.0158883	23.4989	3.11562	0.000266184
WBGene00007224	C01G6.2	23.6599	2.20665	0.00997254	95.6315	4.75986	5.46978e-18
WBGene00007248	catp-4	45.2718	2.90198	1.78688e-07	41.5492	3.16714	1.57654e-06
WBGene00007297	C04F12.1	1478.57	3.81759	5.11288e-61	477.154	2.39082	2.46887e-18
WBGene00007345	C05E7.3	52.9206	2.74226	8.01077e-07	49.7476	3.04692	3.1338e-07
WBGene00007660	pals-6	87.1313	4.433	3.59026e-20	24.2247	2.79244	0.00196341
WBGene00007833	oac-6	61.1541	2.20646	0.000123376	130.716	3.85784	7.34551e-16
WBGene00007835	oac-7	23.5064	2.73244	0.00239749	14.9785	2.38545	0.0181586
WBGene00007850	C31G12.1	126.553	3.29934	1.18261e-17	64.4794	2.60984	6.29632e-07
WBGene00008010	C38D9.2	577.917	3.00599	3.45986e-24	285.622	2.23842	2.64879e-11
WBGene00008099	C44H9.4	139.642	4.11731	1.52872e-13	41.5851	2.55078	0.00269669
WBGene00008207	C49F5.3	61.3797	2.48698	1.53656e-06	67.2146	3.04925	2.82113e-10
WBGene00008210	C49F5.6	745.919	2.39881	1.14123e-33	591.01	2.42574	2.06283e-26
WBGene00008230	pfk-1.2	54.3995	3.94068	5.60147e-11	15.4147	2.32717	0.0210242
WBGene00008301	pals-39	203.994	5.16178	4.85452e-30	35.2506	2.8072	4.90961e-05
WBGene00008323	C55A1.6	85.694	3.25463	5.41548e-08	34.3926	2.14371	0.00120608
WBGene00008396	D1086.9	78.6507	5.08398	7.91981e-18	15.7578	3.01164	0.00375739
WBGene00008490	F01D4.8	17.4933	2.76746	0.00132311	18.9462	3.30433	0.00024086
WBGene00008838	F15A4.2	65.3976	2.3983	3.68481e-05	41.3589	2.0313	0.00490589
WBGene00008850	F15B9.6	160.815	3.58999	8.01101e-15	49.5628	2.05198	0.00176274
WBGene00008862	F15D4.5	1007.44	4.3804	2.39596e-64	294.969	2.8508	3.41403e-19
WBGene00009101	F25B3.4	139.955	2.19969	5.06446e-10	187.063	3.10118	1.63023e-19
WBGene00009102	F25B3.5	335.303	2.16108	3.76626e-15	375.214	2.77099	4.74173e-18
WBGene00009147	F26C11.3	66.3999	2.88508	3.60758e-07	33.4391	2.1294	0.00194292
WBGene00009209	F28C6.10	49.1657	3.10951	1.92721e-08	27.366	2.54039	0.00171047
WBGene00009224	F28F8.7	183.645	2.53873	1.19261e-17	290.627	3.68058	4.00657e-33
WBGene00009280	F31B9.3	93.2861	4.12338	1.62779e-17	30.7631	2.80299	0.000116935
WBGene00009301	F31F6.2	67.0022	3.41849	3.83753e-10	25.3938	2.20901	0.0106575
WBGene00009343	F32H2.6	154.168	3.16572	4.64707e-18	126.732	3.25122	2.85177e-17
WBGene00009381	F34H10.4	196.206	4.10347	1.70253e-35	47.1618	2.20528	6.93162e-05
WBGene00009635	F42F12.3	290.146	2.01059	1.91054e-13	311.09	2.56177	4.01358e-20
WBGene00009658	pap-3	125.969	2.27887	2.20337e-08	128.841	2.73886	3.15646e-13
WBGene00009804	F47B8.3	267.136	2.20738	6.31082e-09	335.495	3.01199	1.23692e-19
WBGene00009816	F47B10.5	23.423	2.2263	0.00714085	23.5085	2.67989	0.00930492
WBGene00009835	F47H4.2	117.559	2.49309	3.4677e-09	77.6182	2.19237	9.44727e-06
WBGene00009862	fbxb-67	17.8279	2.40757	0.00426087	12.2033	2.19152	0.0441805
WBGene00009863	F49B2.3	44.4705	2.12516	0.000729216	37.603	2.27618	0.00202568
WBGene00010004	F53H2.1	171.366	5.21495	1.5983e-33	69.285	4.2063	8.17679e-13
WBGene00010009	F53H4.4	67.3034	2.05938	3.82644e-06	54.8591	2.12722	0.000437724
WBGene00010066	F54F7.6	338.732	4.12179	5.50497e-35	97.2309	2.50558	1.00953e-07
WBGene00010119	F55G7.1	64.0191	3.83091	8.02375e-13	27.5317	2.88374	7.77164e-05
WBGene00010493	meg-2	204.118	2.83831	1.77444e-11	232.761	3.45547	1.06904e-17
WBGene00010691	K08H2.4	135.533	2.56458	6.01055e-14	171.682	3.35669	1.60516e-20
WBGene00010708	phf-33	142.383	2.96045	1.69667e-15	79.4066	2.37962	4.30455e-06
WBGene00010920	M117.4	168.204	2.7761	2.22448e-07	105.218	2.41258	3.4154e-05
WBGene00010989	R03D7.2	787.793	4.44986	5.75378e-67	190.677	2.60963	9.20476e-15
WBGene00011012	R04D3.4	59.5801	2.44867	6.53816e-07	59.8825	2.87242	3.7065e-08
WBGene00011153	R09A8.2	659.354	4.01245	1.65951e-36	562.415	4.15273	5.78198e-40
WBGene00011340	ugt-30	19.4656	2.97808	0.00111094	12.6837	2.6751	0.0448808
WBGene00011342	T01G5.7	85.4419	2.7893	3.29763e-06	80.3341	3.1012	2.33438e-06
WBGene00011431	T04D3.1	175.426	2.28522	1.35764e-09	146.172	2.40295	1.83404e-09
WBGene00011539	fbxa-135	104.72	4.32514	6.64142e-15	88.4381	4.44811	1.09354e-14
WBGene00011677	cyp-13A1	47.6533	3.53258	7.18559e-09	17.3004	2.29013	0.0229436
WBGene00011707	T11B7.2	117.555	2.81777	2.0467e-10	383.303	5.01721	2.58448e-40
WBGene00011752	fbxa-2	76.1305	3.45179	4.73675e-13	35.0827	2.56736	0.00021336
WBGene00011805	T16G12.4	1315.25	2.57738	6.4605e-39	920.532	2.39434	1.04891e-29
WBGene00011989	T24D5.1	84.1919	4.29595	8.39667e-18	19.3928	2.31223	0.0120927
WBGene00011991	T24D5.3	77.2	4.49659	1.84251e-15	27.197	3.26069	4.129e-05
WBGene00011993	T24D5.5	45.1803	5.04467	8.10535e-11	21.1756	4.28528	1.50561e-05
WBGene00012112	T28A8.6	279.184	2.09094	1.19864e-10	274.081	2.49411	2.35585e-14
WBGene00012151	VH15N14R.1	43.9907	2.7202	1.08755e-06	24.005	2.12283	0.00633201
WBGene00012280	W05E10.1	60.9767	2.26334	0.00189141	41.9924	2.03245	0.0157163
WBGene00012299	W06D11.1	26.7176	2.19507	0.0029731	25.4435	2.53272	0.00167133
WBGene00012381	Y2H9A.4	141.101	3.98284	3.13258e-20	48.3736	2.65666	0.000603113
WBGene00012444	Y15E3A.5	1256.51	2.24083	4.02778e-19	3028.78	4.06072	8.1119e-60
WBGene00012491	Y20C6A.1	72.7814	2.30297	8.24755e-07	51.4049	2.13857	0.000150074
WBGene00012492	fbxb-7	137.183	3.19803	5.64445e-20	130.553	3.51481	6.36261e-20
WBGene00012525	Y32B12C.1	60.1376	3.54635	2.79214e-10	41.8147	3.37986	8.86635e-06
WBGene00012535	Y37A1A.2	57.24	2.65569	1.66278e-06	79.8351	3.59405	9.20444e-10
WBGene00012552	enu-3.5	453.866	3.78456	1.08155e-32	138.553	2.2526	2.24518e-08
WBGene00012618	dct-10	457.969	3.31486	2.21026e-43	317.671	3.13003	3.82396e-31
WBGene00012898	Y46G5A.6	96.6738	2.66597	9.87136e-12	84.6399	2.85294	2.66052e-10
WBGene00012979	Y48B6A.5	62.913	3.52866	8.86911e-12	26.1021	2.51233	0.00128362
WBGene00013086	arrd-2	82.4814	2.57616	1.43826e-07	61.4551	2.49832	1.01221e-05
WBGene00013215	Y54G11A.4	210.745	4.52442	4.26534e-39	76.2629	3.35254	4.16048e-13
WBGene00013511	Y71A12B.15	108.827	3.79401	2.93438e-18	84.4334	3.78833	1.20488e-16
WBGene00013513	Y71A12C.2	32.3396	2.81302	0.000107438	16.9322	2.15528	0.0374213
WBGene00013559	Y75B8A.28	87.1831	3.48766	4.93668e-10	131.896	4.51742	8.58598e-19
WBGene00013586	Y80D3A.8	90.0053	3.4495	2.5528e-15	36.0568	2.3582	0.0100094
WBGene00013610	fbxa-206	66.7	2.82391	2.37025e-07	36.2322	2.20458	0.00083763
WBGene00013659	Y105C5B.20	48.8025	2.34411	0.000309656	91.789	3.76172	1.02011e-12
WBGene00013755	fbxa-115	79.4081	2.89228	4.13992e-11	80.7995	3.32486	1.31232e-12
WBGene00013759	fbxb-59	75.2113	3.8531	3.54802e-16	31.0462	2.84495	0.000220637
WBGene00013873	cest-2.3	66.0317	3.00523	4.10095e-09	32.2422	2.20016	0.00258265
WBGene00014166	ZK945.4	110.957	2.5699	5.49119e-09	103.65	2.86806	7.37427e-09
WBGene00014179	ZK1010.5	77.7797	4.24586	3.53865e-13	15.7741	2.08737	0.0409192
WBGene00014192	nhr-246	35.2467	4.87859	4.28135e-08	57.0772	5.96094	1.92985e-13
WBGene00014729	E03H4.9	53.0718	4.34738	9.57789e-10	62.908	4.97632	5.75509e-13
WBGene00014801	K08E5.1	167.28	2.583	1.27482e-12	127.134	2.53569	5.26904e-09
WBGene00014814	R03D7.3	1084.66	5.4909	6.03263e-120	368.132	4.24346	1.76855e-50
WBGene00014836	T09F5.12	404.864	2.44696	2.23803e-21	274.382	2.20223	9.20473e-14
WBGene00014914	Y52B11A.11	74.0858	2.10092	9.9062e-05	73.8192	2.51888	1.09289e-06
WBGene00014994	ZK1225.7	31.3779	2.04779	0.00258831	37.7047	2.79203	1.35822e-05
WBGene00015041	cyp-34A6	50.0007	4.23473	1.85961e-11	25.1395	3.54302	3.36826e-05
WBGene00015057	gad-3	194.59	2.29129	4.12962e-09	138.459	2.13555	5.13638e-07
WBGene00015119	B0302.2	16.4178	2.09798	0.0487412	14.226	2.27917	0.048952
WBGene00015159	psd-1	3934.44	2.11574	4.02772e-28	3132.98	2.15356	8.80119e-22
WBGene00015227	ddn-1	1212.27	5.46501	2.07669e-70	162.589	2.74929	4.64888e-11
WBGene00015409	C03H5.7	56.482	2.09523	0.00134963	55.7115	2.49134	3.33334e-05
WBGene00015434	C04E12.4	30.7087	3.05634	6.6832e-06	14.5204	2.20403	0.02571
WBGene00015437	scrm-3	76.9432	3.23637	2.49913e-08	58.9976	3.20207	1.42001e-06
WBGene00015562	C07D8.2	128.233	3.56415	1.3834e-16	44.4364	2.21648	0.000172803
WBGene00015576	C07G3.8	16.8619	2.40207	0.0111005	14.7388	2.57586	0.0150895
WBGene00015602	fbxa-158	121.225	3.1979	9.55131e-16	66.5334	2.61735	5.55336e-07
WBGene00015666	gad-2	439.087	4.08128	1.57469e-47	198.247	3.23051	1.61077e-24
WBGene00015739	ugt-7	21.5465	2.08295	0.010975	36.7532	3.3925	8.55877e-07
WBGene00015885	fbxa-65	105.417	2.05282	7.89297e-07	83.1472	2.07288	1.71268e-05
WBGene00015889	C17C3.3	36.4564	2.26445	0.000320155	78.7743	3.92034	8.78723e-14
WBGene00015912	fbxc-50	118.204	2.63188	3.65939e-07	67.8874	2.1108	0.000378019
WBGene00015914	C17F4.8	32.9007	2.44189	0.000787117	43.149	3.30339	1.33667e-07
WBGene00016072	C24H12.2	97.3567	2.92161	4.08116e-11	51.6389	2.28767	7.53772e-05
WBGene00016230	C29G2.2	42.0919	2.65602	3.35375e-05	29.1581	2.45068	0.00120818
WBGene00016247	C30B5.6	147.668	4.47324	2.28377e-25	55.2289	3.29187	1.13512e-06
WBGene00016299	C32B5.6	20.2291	2.65146	0.0013173	28.4825	3.60109	1.50091e-05
WBGene00016306	C32B5.13	25.7327	3.02814	0.000400175	12.8551	2.30175	0.0437702
WBGene00016307	fbxc-18	46.8008	2.09299	0.00143545	47.7844	2.55209	1.24618e-05
WBGene00016308	C32B5.15	63.7165	2.09448	0.000989844	54.8304	2.26791	0.000469616
WBGene00016346	fbxa-120	21.1661	2.55245	0.00165831	23.8672	3.16223	0.000705652
WBGene00016349	C33E10.8	130.845	3.80104	6.84012e-19	83.3819	3.49413	4.80507e-13
WBGene00016639	C44B12.6	153.24	5.82252	7.66309e-30	24.8421	3.45551	2.96053e-05
WBGene00016785	C49G7.7	28.5788	2.96939	9.12776e-05	50.8382	4.2515	1.93009e-10
WBGene00016796	cec-2	169.995	2.04501	7.39335e-10	163.303	2.4106	2.70258e-14
WBGene00016886	fbxb-96	79.7273	2.95183	2.2639e-08	54.6153	2.75364	5.28814e-06
WBGene00017140	EEED8.12	56.4022	2.79246	9.4095e-06	49.3169	2.98497	7.51995e-06
WBGene00017208	fbxb-35	82.976	2.29334	4.61424e-07	64.2891	2.27905	2.26305e-05
WBGene00017254	fbxb-111	51.5445	2.85269	0.000121875	56.624	3.42122	1.23209e-08
WBGene00017329	ugt-39	56.5075	2.30684	0.000155593	235.817	4.94344	8.37885e-32
WBGene00017402	F12E12.1	48.7086	2.65156	1.24784e-05	31.3469	2.31884	0.00147031
WBGene00017443	F13H8.11	51.68	2.28444	5.23116e-05	36.6409	2.11687	0.00302573
WBGene00017504	F16B4.2	35.776	3.39233	3.08447e-07	22.2053	3.04932	0.00124742
WBGene00017583	F19B10.1	245.282	2.29815	7.72891e-14	281.563	2.94785	4.76407e-26
WBGene00017584	F19B10.2	464.835	4.58653	2.3428e-50	156.517	3.30041	7.38296e-17
WBGene00017586	F19B10.4	50.6823	2.46389	4.36436e-06	158.895	4.66681	3.59944e-30
WBGene00017587	F19B10.5	114.615	4.29502	6.33728e-16	82.1445	4.14929	5.74325e-11
WBGene00017589	F19B10.10	545.402	3.23794	1.56619e-29	301.814	2.68167	6.38046e-19
WBGene00017711	F22E5.13	34.3737	2.33441	0.000154999	56.1417	3.54422	4.08938e-10
WBGene00017724	F22F7.7	543.297	2.22054	5.45252e-19	406.971	2.14779	1.00629e-16
WBGene00017729	F22H10.5	189.711	4.03652	4.60718e-28	45.4721	2.09196	0.000542757
WBGene00017893	F28B4.4	41.9903	2.16579	0.000273618	84.3031	3.70847	1.8184e-15
WBGene00017894	F28B12.1	85.8116	3.016	3.72082e-11	45.3815	2.35581	0.000237937
WBGene00017949	F31D5.6	336.069	3.15291	1.0546e-32	336.162	3.55196	2.15427e-22
WBGene00018061	arrd-19	410.731	2.63111	2.03362e-30	232.254	2.0733	3.69114e-13
WBGene00018203	F39F10.3	143.891	4.25582	1.36713e-29	46.9078	2.89514	2.21163e-07
WBGene00018252	F40H3.6	174.3	2.54036	8.02461e-12	105.63	2.11447	3.35502e-06
WBGene00018353	fbxa-182	212.871	4.8685	8.49885e-40	70.148	3.5274	1.23991e-11
WBGene00018424	pgph-2	213.54	3.41036	1.92854e-19	235.328	3.94809	1.06338e-28
WBGene00018435	btb-9	90.1891	3.70449	3.90165e-13	58.3439	3.42439	1.5521e-07
WBGene00018465	F45E1.4	146.156	3.5641	9.37131e-14	212.314	4.50674	5.04523e-39
WBGene00018466	F45E1.5	85.846	2.39033	1.2135e-08	89.0348	2.86812	6.30177e-10
WBGene00018614	pals-31	78.0981	3.36235	3.19289e-14	46.9766	2.93748	2.06163e-07
WBGene00018615	F48G7.4	81.0577	2.5189	2.24317e-09	53.5022	2.24206	3.39585e-05
WBGene00018648	F49F1.8	283.145	3.34387	5.19817e-20	166.135	2.88954	2.78691e-13
WBGene00018671	F52C6.14	45.742	2.38356	0.00013066	59.356	3.21922	4.96777e-08
WBGene00018711	F52G3.3	16.1528	2.30225	0.00901154	33.8721	3.91165	5.78297e-08
WBGene00018730	F53A9.7	122.138	2.79723	4.51233e-08	336.42	4.77668	6.02594e-32
WBGene00018751	F53C3.7	37.3459	2.38846	0.000893253	58.2225	3.52027	2.44896e-07
WBGene00018752	F53C3.8	98.717	3.9208	1.52241e-17	35.7623	2.73572	7.65057e-05
WBGene00018755	bcmo-2	139.918	3.80954	9.82248e-22	57.4114	2.76661	2.38216e-06
WBGene00018761	F53E10.5	116.158	3.6695	8.14796e-14	85.64	3.59258	3.11611e-11
WBGene00019047	F58E2.3	215.062	3.66779	1.04629e-24	101.187	2.84573	1.76685e-09
WBGene00019070	F58H7.5	72.6935	4.60426	2.34447e-15	52.5703	4.48737	1.64612e-11
WBGene00019140	bath-3	37.3001	2.15499	0.00149612	30.1754	2.22719	0.00635231
WBGene00019413	fbxb-50	21.8701	2.80775	0.00223588	27.1646	3.56583	6.99671e-06
WBGene00019519	K08B5.2	90.0853	2.02431	6.0206e-07	94.329	2.54104	1.13464e-09
WBGene00019578	K09E3.7	372.658	5.39744	5.83435e-51	54.7072	2.80217	1.39717e-06
WBGene00019799	M151.7	119.195	2.33533	1.72822e-07	144.513	3.07457	1.54177e-13
WBGene00019812	R01H2.4	71.5249	4.49729	9.00992e-17	15.0313	2.41806	0.0136715
WBGene00019815	kin-34	81.7029	2.41413	1.44965e-08	145.556	3.75455	1.27576e-23
WBGene00019817	txt-2	43.294	2.46853	8.52182e-06	98.0917	4.16935	1.89188e-19
WBGene00019844	abts-4	495.866	2.58231	7.25638e-20	396.88	2.6251	4.66565e-20
WBGene00019858	R03H10.6	270.82	2.77706	1.55242e-20	384.071	3.73313	4.96259e-37
WBGene00019912	R06B10.1	28.3868	2.41497	0.000323884	20.0876	2.23817	0.00751519
WBGene00019922	fbxc-28	240.076	2.51207	2.12755e-16	184.54	2.49233	3.30266e-11
WBGene00020050	R13A5.7	158.445	2.51853	6.32133e-10	110.94	2.33662	3.92831e-07
WBGene00020080	math-37	76.9779	2.10094	4.79687e-07	61.05	2.12637	0.000236971
WBGene00020120	R160.3	79.5812	3.43967	9.37287e-13	30.6299	2.2498	0.0127671
WBGene00020135	aakg-4	409.292	2.69016	4.41564e-30	249.507	2.26614	6.73682e-13
WBGene00020338	T08A9.6	130.069	4.14808	9.49349e-25	67.8764	3.55256	1.97317e-11
WBGene00020612	arrd-22	625.08	5.14466	2.51862e-49	168.708	3.53635	3.96337e-18
WBGene00020765	T24C12.3	208.133	2.15098	8.22725e-16	256.562	2.92543	1.25258e-24
WBGene00020771	T24E12.1	70.9583	2.61296	5.01596e-08	52.9005	2.55099	2.54799e-05
WBGene00020778	T24E12.11	75.4041	3.01818	4.64523e-08	102.183	3.87871	6.59458e-16
WBGene00020817	T25G12.11	107.599	3.10319	1.51017e-11	61.3571	2.59924	8.4622e-07
WBGene00020966	W03A5.1	80.3273	4.45296	1.82786e-16	71.2434	4.65153	3.00209e-16
WBGene00021015	enu-3.3	680.373	4.17347	1.12373e-44	186.366	2.51033	3.23863e-14
WBGene00021034	enu-3.4	213.464	4.42342	4.82131e-28	36.4642	2.02997	0.00664687
WBGene00021101	W08F4.12	17.3372	2.33211	0.00637962	12.1204	2.1362	0.0482414
WBGene00021214	hasp-2	19.2382	2.32912	0.0126862	14.5785	2.28306	0.0194264
WBGene00021293	Y25C1A.6	32.6323	2.0994	0.00181164	27.1969	2.20899	0.00509
WBGene00021372	ugt-45	541.652	2.18222	6.81571e-23	427.755	2.20505	9.80363e-22
WBGene00021483	Y40A1A.1	86.1625	2.78616	1.33374e-10	51.825	2.3499	0.000129248
WBGene00021529	Y41G9A.5	930.368	3.02574	6.43719e-39	560.724	2.59803	3.50428e-22
WBGene00021557	Y45G5AM.5	20.0251	2.23855	0.00530192	33.0506	3.46783	2.82084e-06
WBGene00021603	clec-204	168.835	5.64171	8.50597e-32	19.3411	2.63471	0.00872778
WBGene00021633	Y47G6A.3	50.8825	2.08243	6.48635e-05	60.4585	2.8016	1.21605e-07
WBGene00021875	Y54G2A.10	39.4193	2.56896	0.00023584	23.6011	2.09403	0.0267919
WBGene00021878	Y54G2A.13	16.5936	2.14019	0.0259231	15.0741	2.39645	0.017221
WBGene00022140	Y71G12A.4	44.1837	3.1936	9.25745e-08	65.7452	4.20272	4.11559e-13
WBGene00022262	Y73C8C.3	37.8502	2.08061	0.00856202	36.3204	2.45416	0.0036486
WBGene00022311	Y77E11A.8	14.8804	2.88744	0.0212057	29.7751	4.37457	1.26439e-07
WBGene00022337	pals-16	74.1056	2.94335	2.16922e-10	50.0454	2.72	4.41675e-06
WBGene00022508	ZC53.1	138.823	3.95663	1.53831e-24	95.5739	3.75591	1.06092e-16
WBGene00022536	ZC178.2	641.468	2.73732	9.35794e-25	686.457	3.24825	1.12798e-40
WBGene00022555	btb-12	26.8577	2.66314	0.00195408	40.5804	3.73695	6.48013e-08
WBGene00022609	ZC416.2	14.2521	2.63599	0.00874148	11.9771	2.75514	0.0129555
WBGene00022690	math-49	33.7093	2.01039	0.0129717	47.5935	3.03052	0.000106308
WBGene00022970	CD4.10	156.239	2.48535	1.67353e-08	149.306	2.82094	5.08624e-09
WBGene00023246	C33E10.4	106.701	3.78467	2.40636e-14	50.7175	3.01947	1.75314e-06
WBGene00044030	Y17G7B.23	28.7847	2.19916	0.000840504	20.1803	2.03198	0.0314006
WBGene00044032	ceh-99	333.336	4.67764	3.5913e-37	68.8922	2.61008	9.18777e-08
WBGene00044219	F28F8.10	62.7552	2.63625	1.3519e-06	98.1875	3.74194	3.53661e-13
WBGene00044280	W02A2.9	150.573	2.38668	5.08129e-07	134.04	2.60686	1.15115e-08
WBGene00044436	Y47G6A.31	68.3985	2.03873	2.46597e-06	67.1686	2.44054	7.25849e-07
WBGene00044503	Y73B6A.6	243.732	4.59904	1.12155e-27	50.6818	2.51346	6.59101e-05
WBGene00044529	irld-1	26.2439	3.53607	3.43034e-06	12.9736	2.80638	0.00933784
WBGene00044733	W08F4.13	27.8735	2.07308	0.0124562	25.0817	2.33663	0.00405019
WBGene00045291	F23D12.10	215.846	4.30316	4.51985e-33	127.819	3.88007	8.33956e-21
WBGene00045292	fbxa-179	248.678	2.92945	1.30381e-19	134.197	2.31418	2.33305e-06
WBGene00045401	eol-1	320.118	5.57888	4.80704e-59	73.9146	3.7642	2.8348e-14
WBGene00050899	T10C6.15	43.9246	3.16587	4.24679e-07	30.1919	2.95385	0.000178043
WBGene00077629	K10G4.13	56.3047	2.57548	0.00025325	47.0891	2.70425	0.000479303
WBGene00077687	Y52B11A.14	150.375	2.81913	0.00780645	180.689	3.48762	2.78551e-11
WBGene00077772	T02G6.10	95.9945	2.11715	1.23774e-06	115.507	2.85247	7.49846e-14
WBGene00086555	F49B2.7	30.7803	3.13455	1.46772e-05	55.7983	4.42391	6.8209e-12
WBGene00164971	T21E8.6	18.1007	2.70142	0.00378691	23.055	3.50287	5.10875e-05
WBGene00164972	T21E8.7	25.3041	2.75803	0.000250589	21.315	2.88388	0.0046213
WBGene00185077	F58D2.4	49.0706	2.88486	0.000137468	62.3617	3.66733	1.89112e-09
WBGene00195254	H16D19.6	77.7054	5.18168	1.75341e-17	24.3533	3.80621	5.21775e-06
WBGene00206366	C03H5.9	33.4483	3.0706	4.55777e-06	31.5928	3.37159	4.182e-06
WBGene00206378	C14E2.11	65.6016	4.64014	1.60664e-13	21.3116	3.26332	0.000225717
WBGene00206414	F31D5.7	108.999	2.77145	9.09469e-12	79.8175	2.66091	1.65991e-08
WBGene00206497	Y52B11A.18	28.6076	3.16261	3.68669e-05	26.8238	3.46693	2.84104e-05
WBGene00219303	Y13C8A.4	324.828	4.60676	5.1931e-52	98.4968	3.16294	1.19155e-10
WBGene00219316	F21A3.11	72.642	3.06948	1.18669e-08	67.8544	3.3621	6.88784e-09
WBGene00219491	Y53F4B.62	18.3873	2.2316	0.0244215	17.7939	2.5945	0.00729773
WBGene00219827	C23G10.12	10.489	2.78064	0.0173348	8.021	2.74863	0.0416173
WBGene00235267	Y77E11A.23	323.995	2.81281	4.98149e-15	271.14	2.93293	3.68691e-19
WBGene00235351	C32B5.18	24.4399	2.65084	0.000323615	36.165	3.68356	1.65948e-07
WBGene00270290	ZK938.11	22.5553	2.00261	0.022754	28.0177	2.79742	0.000658998
WBGene00271605	H05L14.3	162.675	5.99649	3.22474e-30	84.575	5.39219	2.87764e-19

## Sheet:  both down(log2FC<-2)
WormBase ID	Public Name	baseMean-hda-1RNAi vs. WT	log2FC-hda-1RNAi vs. WT	padj-hda-1RNAi vs. WT	baseMean-lin-53RNAi vs. WT	log2FC-lin-53RNAi vs. WT	padj-lin-53RNAi vs. WT
WBGene00000031	abu-8	438	-2.4229	1.67319e-12	299.881	-4.67372	4.77224e-30
WBGene00000034	abu-11	573.047	-3.25917	2.16012e-22	421.697	-4.66934	4.57706e-10
WBGene00000047	acr-8	316.117	-2.86143	1.08145e-26	238.361	-3.32681	3.35525e-24
WBGene00000136	amt-4	237.405	-4.2468	5.19831e-36	190.116	-3.64265	2.38016e-13
WBGene00000169	aqp-1	69.1357	-3.10653	1.03479e-10	58.5122	-2.22341	0.00072403
WBGene00000172	aqp-4	545.528	-5.23083	1.63307e-89	427.797	-4.93124	9.0115e-47
WBGene00000176	aqp-8	108.713	-3.88469	3.88914e-20	88.1604	-3.23052	5.04526e-11
WBGene00000214	asp-1	7116.54	-8.32209	1.75218e-211	5657.7	-5.59835	6.04298e-22
WBGene00000215	asp-2	1343.97	-3.30491	1.68033e-29	975.665	-5.46322	5.50858e-87
WBGene00000216	asp-3	5235.21	-5.59292	1.60752e-78	4136.43	-4.9327	3.90793e-111
WBGene00000218	asp-5	2036.97	-4.48378	4.01684e-73	1578.6	-4.78383	3.86064e-76
WBGene00000219	asp-6	2238.36	-4.26162	1.73633e-51	1833.19	-3.29934	1.1413e-35
WBGene00000283	cah-5	299.359	-2.34274	2.11887e-18	239.651	-2.1238	1.42023e-12
WBGene00000286	cal-2	105.759	-2.06162	3.87847e-06	70.9467	-3.8884	3.1471e-12
WBGene00000447	ceh-24	75.5298	-3.0659	2.09752e-10	58.4962	-3.11455	1.57387e-08
WBGene00000521	cky-1	865.017	-2.80988	5.52105e-24	647.274	-3.40353	2.92106e-06
WBGene00000529	clh-2	106.167	-2.27634	2.74126e-07	82.5291	-2.29246	5.51278e-06
WBGene00000557	cnc-3	177.785	-4.04185	3.12587e-27	142.283	-3.48809	1.27426e-12
WBGene00000594	col-3	646.403	-5.86734	1.93101e-17	507.131	-5.56936	1.34598e-51
WBGene00000599	col-10	1172.58	-6.99372	1.7167e-89	945.73	-4.68033	2.04935e-07
WBGene00000601	col-12	257.627	-2.87793	9.1787e-12	181.317	-5.60509	6.2626e-24
WBGene00000603	col-14	1558.77	-3.2592	1.68809e-35	1184.93	-3.7548	5.25754e-46
WBGene00000616	col-39	425.056	-3.20681	3.09432e-14	314.522	-4.42281	6.6024e-05
WBGene00000625	col-48	1334.64	-4.52374	1.67286e-60	1069.55	-3.84275	1.26323e-43
WBGene00000630	col-53	122.6	-2.31703	2.66567e-08	91.1332	-2.8022	7.45273e-05
WBGene00000650	col-74	11858.2	-8.48887	2.85088e-212	9256.44	-10.3002	4.45437e-202
WBGene00000653	col-77	1057.42	-7.94021	1.09724e-88	833.815	-6.25857	5.35929e-22
WBGene00000664	col-89	128.793	-2.81474	2.95144e-11	94.5297	-3.7506	7.97343e-14
WBGene00000672	col-97	2478.92	-2.59897	8.27679e-30	1755.04	-4.16763	5.50665e-64
WBGene00000678	col-104	1823.02	-5.17421	5.25864e-76	1413.47	-5.64354	5.71552e-87
WBGene00000681	col-107	2537.7	-3.35117	8.19305e-47	1948.9	-3.65818	6.33279e-53
WBGene00000683	col-109	1898.82	-4.3229	4.98234e-42	1451.58	-5.2081	2.95443e-70
WBGene00000689	col-115	106.97	-4.35517	9.22934e-20	88.1913	-3.23534	1.58915e-08
WBGene00000691	col-117	457.326	-7.98109	1.14667e-53	361.575	-6.12651	3.74788e-12
WBGene00000699	col-125	2021.76	-7.25739	3.4375e-90	1623.26	-4.92969	0.00086474
WBGene00000704	col-130	441.452	-5.68735	1.48569e-40	369.914	-3.46356	3.49862e-21
WBGene00000717	col-144	791.837	-6.51398	2.56259e-21	629.841	-5.24212	7.54418e-06
WBGene00000720	col-147	588.457	-5.18637	2.04386e-13	490.124	-3.44683	0.0253443
WBGene00000733	col-160	586.583	-2.29593	0.0138306	410.897	-3.74059	0.00120682
WBGene00000738	col-165	14491.6	-6.95535	3.69076e-150	11276.2	-7.75305	9.72138e-172
WBGene00000739	col-166	1994.54	-4.18736	5.46653e-32	1565.41	-4.125	2.24107e-33
WBGene00000740	col-167	1273.22	-5.77993	1.00256e-13	1018.21	-4.67604	5.23099e-08
WBGene00000742	col-169	142.409	-4.12054	3.07755e-19	131.086	-2.04982	1.43523e-05
WBGene00000745	col-172	93.8466	-3.71267	1.16815e-13	77.7555	-2.84257	4.26309e-09
WBGene00000753	col-180	153.612	-2.48988	1.46888e-12	125.114	-2.10607	0.000192156
WBGene00000778	cpn-2	492.068	-2.06724	4.16702e-14	358.884	-2.66582	4.74632e-15
WBGene00000785	cpr-5	189.056	-3.65163	6.95077e-20	150.643	-3.31773	5.31845e-13
WBGene00000822	csq-1	2232.9	-2.34794	2.30684e-31	1624.62	-3.11536	1.58398e-50
WBGene00000845	cup-4	292.577	-2.36022	5.29366e-19	231.89	-2.22391	3.23863e-14
WBGene00000853	cut-6	2858.01	-5.05325	2.54233e-136	2201.54	-5.87975	5.77677e-23
WBGene00000893	cyn-17	2914.85	-2.28268	1.51728e-24	1983.36	-4.27911	1.62463e-86
WBGene00000902	daf-6	605.955	-2.55352	4.12626e-28	472.72	-2.55803	6.6231e-24
WBGene00000907	daf-11	149.72	-2.51718	1.94057e-09	107.456	-3.75874	6.68892e-10
WBGene00000963	dhp-1	340.036	-2.78895	9.17932e-29	262.242	-2.91843	2.85534e-15
WBGene00001053	dop-2	85.437	-2.39603	0.000216978	66.1435	-2.42489	4.47294e-05
WBGene00001059	dpf-6	202.929	-2.02452	9.00202e-09	148.596	-2.56282	5.49057e-09
WBGene00001063	dpy-1	4724.24	-4.08445	2.6213e-70	3557.26	-5.51995	5.51893e-145
WBGene00001070	dpy-8	43.5112	-3.86989	1.86959e-08	37.0371	-2.59316	0.000223372
WBGene00001099	dsc-4	2585.51	-2.88861	6.42401e-43	2218.24	-2.01005	2.01791e-27
WBGene00001113	dur-1	421.283	-2.81197	2.47084e-15	327.212	-2.89965	1.34312e-13
WBGene00001132	alp-1	9081.69	-2.02667	7.20123e-22	6154.62	-3.60023	2.0748e-81
WBGene00001242	elo-4	826.226	-3.5165	8.27193e-49	622.052	-4.31037	1.79702e-67
WBGene00001403	fbl-1	622.607	-2.60324	2.43176e-34	464.905	-3.10666	4.47456e-35
WBGene00001441	fkh-9	2600.85	-2.50784	2.72602e-20	1988.29	-2.72898	1.05756e-26
WBGene00001444	flp-1	215.169	-3.50083	4.35373e-21	167.024	-3.62701	3.06953e-26
WBGene00001450	flp-7	29.3236	-2.92912	0.000209091	24.2764	-2.25509	0.00732612
WBGene00001468	flr-4	93.0384	-2.08045	1.72292e-06	62.5791	-3.94419	5.2277e-13
WBGene00001476	fmo-1	761.75	-2.84797	4.55559e-31	540.254	-4.83614	2.17158e-44
WBGene00001543	gcy-18	126.316	-2.07027	1.18206e-08	93.687	-2.50445	3.40137e-09
WBGene00001570	gei-13	26457	-2.23798	4.72346e-21	18360.3	-3.68389	1.27686e-85
WBGene00001581	gfi-1	7584.03	-2.28998	2.34923e-18	5073.25	-5.01296	2.36854e-112
WBGene00001613	glr-2	111.352	-2.84317	1.30359e-07	88.3281	-2.68458	1.93453e-06
WBGene00001623	glt-5	49.3447	-2.14009	0.00360714	37.7777	-2.26865	0.00435939
WBGene00001644	gly-19	119.761	-3.69007	1.12474e-21	101.557	-2.56931	1.92588e-10
WBGene00001694	grd-5	296.875	-2.71672	1.4437e-11	232.089	-2.70375	4.17296e-09
WBGene00001702	grd-13	143.893	-3.76719	1.69823e-18	118.167	-2.96523	4.1961e-11
WBGene00001707	grh-1	604.688	-2.98014	8.27298e-28	436.218	-4.6222	1.71669e-09
WBGene00001710	grl-1	174.942	-2.5896	1.02433e-07	130.796	-3.10521	1.99946e-16
WBGene00001713	grl-4	183.057	-5.23619	3.5173e-08	150.088	-3.75151	0.000451163
WBGene00001714	grl-5	3051.65	-9.61124	3.5445e-159	2399.13	-6.67202	1.17002e-162
WBGene00001715	grl-6	50.4478	-2.26273	9.81521e-06	36.9978	-2.89884	0.000263076
WBGene00001716	grl-7	4195.63	-7.81379	4.27523e-163	3278.25	-7.29932	1.04252e-190
WBGene00001719	grl-10	1451.03	-2.62185	7.98365e-32	1014.16	-4.58514	2.79261e-12
WBGene00001724	grl-15	3045.41	-8.59377	3.13153e-189	2384.8	-7.22371	4.77003e-143
WBGene00001725	grl-16	4927.26	-5.86395	6.67315e-121	3886.14	-5.20495	6.92983e-20
WBGene00001727	grl-18	121.218	-4.96531	2.77639e-21	100.505	-3.3815	1.47298e-11
WBGene00001754	gst-6	59.6953	-3.49559	3.7327e-07	46.8058	-3.5604	3.69669e-06
WBGene00001795	gtl-1	897.484	-2.11594	2.55499e-24	669.596	-2.50878	5.2294e-24
WBGene00001863	him-4	5322.25	-2.27327	3.23324e-38	3647.58	-4.0778	3.46218e-107
WBGene00001984	hog-1	188.076	-3.12986	1.39163e-23	143.813	-3.44562	4.0524e-21
WBGene00002057	ifd-1	1589.54	-3.27625	3.13927e-80	1227.71	-3.42714	8.50689e-35
WBGene00002067	ifp-1	3139.39	-2.44155	1.38162e-43	2222.69	-3.76922	2.5223e-48
WBGene00002146	ipp-5	394.524	-3.84673	2.06499e-39	324.032	-3.00791	1.53902e-24
WBGene00002259	lbp-7	80.9123	-2.69256	3.3089e-07	61.9461	-2.93993	3.70921e-08
WBGene00002268	lec-5	1848.53	-3.63504	7.09416e-57	1371.36	-5.26643	5.38613e-09
WBGene00002272	lec-9	233.376	-2.95496	6.467e-15	185.848	-2.76814	1.66815e-09
WBGene00002976	lev-9	250.287	-2.14697	6.73228e-13	184.686	-2.6588	5.61411e-08
WBGene00003003	lin-14	4367.79	-2.54425	1.44366e-27	3018.5	-4.78057	7.1547e-107
WBGene00003057	lon-3	346.562	-2.77	5.37421e-30	256.559	-3.47795	5.11782e-21
WBGene00003075	lrx-1	408.842	-2.77632	1.38172e-38	287.01	-5.04124	3.35423e-52
WBGene00003097	lys-8	259.861	-2.73737	8.45039e-19	219.153	-2.04134	1.60692e-08
WBGene00003104	mab-7	1147.05	-2.35727	2.48313e-23	782.079	-4.51772	5.35737e-52
WBGene00003169	mec-5	268.52	-2.23477	1.37408e-17	183.242	-4.02578	3.56646e-19
WBGene00003178	mec-17	362.051	-3.12039	1.09086e-16	273.689	-3.70875	2.70799e-20
WBGene00003388	moe-3	454.456	-3.99252	5.83435e-51	378.813	-2.88635	5.4022e-28
WBGene00003514	myo-2	5505.76	-2.50657	8.49861e-23	3819.81	-4.52723	1.60727e-70
WBGene00003526	nas-7	229.2	-4.13712	6.74751e-19	189.805	-3.02889	1.7506e-08
WBGene00003531	nas-12	66.0157	-2.07559	9.46329e-05	47.0399	-2.9536	1.93285e-05
WBGene00003532	nas-13	64.214	-3.94224	7.2053e-12	57.0596	-2.26434	0.000227062
WBGene00003554	nas-38	107.152	-3.13092	2.68804e-09	91.4119	-2.23172	2.20624e-05
WBGene00003736	nhx-9	882.426	-3.0148	7.16686e-33	657.502	-3.79407	3.09654e-05
WBGene00003773	nlt-1	171.83	-2.12789	2.70381e-11	129.262	-2.43285	8.55136e-10
WBGene00003786	npa-1	6080.76	-2.4016	1.05593e-45	4933.14	-2.08409	6.7213e-33
WBGene00003860	oig-2	60.3013	-2.47412	1.41942e-05	49.0224	-2.11805	0.0013786
WBGene00003877	pept-1	2689.77	-3.09408	4.00815e-43	1943.96	-4.90239	1.91098e-52
WBGene00003887	osm-7	609.412	-2.14655	5.03042e-13	425.03	-3.40805	1.60528e-24
WBGene00003888	osm-8	1593.07	-7.71992	9.1862e-26	1245.55	-7.28694	1.07978e-14
WBGene00003943	pbo-4	356.846	-2.24839	3.18651e-18	265.876	-2.70946	6.54014e-11
WBGene00003956	pcp-1	782.716	-2.11729	1.29166e-23	559.178	-2.98611	1.15847e-19
WBGene00003957	pcp-2	201.807	-4.84859	1.70019e-28	187.273	-2.12263	5.5848e-05
WBGene00004033	pkc-2	599.981	-2.25334	8.38221e-21	477.073	-2.10622	4.56151e-13
WBGene00004058	pmp-1	290.856	-3.77108	5.11929e-39	218.116	-4.91559	1.1029e-31
WBGene00004104	pqn-13	10413.2	-2.16249	4.09867e-19	6988.32	-4.27592	1.27055e-76
WBGene00004112	pqn-22	1215.93	-5.43336	1.07871e-96	1032.85	-3.15273	6.86279e-24
WBGene00004120	pqn-32	7982.56	-5.00254	6.57099e-82	6082.79	-7.04791	5.97465e-188
WBGene00004127	abu-12	845.388	-4.51848	4.79785e-54	656.394	-4.75311	1.8632e-08
WBGene00004133	abu-13	4915.33	-4.25043	5.0816e-77	3737.43	-5.29985	3.89728e-184
WBGene00004156	pqn-74	4118.39	-4.37393	1.0076e-13	3177.21	-4.82895	1.9798e-69
WBGene00004174	abu-14	9460.96	-2.66077	8.70755e-28	6790.08	-3.95813	1.14304e-76
WBGene00004210	ptc-3	8694.66	-2.23511	2.48105e-27	6321.74	-2.9522	2.01343e-54
WBGene00004221	ptr-6	1452.43	-4.4991	4.25308e-84	1114.23	-5.19814	6.34937e-09
WBGene00004230	ptr-16	726.94	-4.31968	4.22293e-66	555.936	-5.12394	2.8447e-69
WBGene00004232	ptr-18	2396.57	-4.24213	8.78338e-94	1812.58	-5.53324	6.31605e-145
WBGene00004234	ptr-20	350.69	-2.8009	1.25253e-20	249.336	-4.54638	9.74609e-26
WBGene00004264	qua-1	2147.21	-2.62686	2.75874e-25	1510.71	-4.42635	1.72428e-76
WBGene00004267	rab-3	569.428	-2.75698	2.25329e-22	432.027	-3.11778	6.8542e-20
WBGene00004300	ram-2	3074.54	-6.26647	4.80491e-80	2428.66	-5.48047	6.03957e-16
WBGene00004921	snt-1	102.42	-2.38371	1.19123e-06	75.6166	-3.0333	8.8884e-08
WBGene00004926	snt-6	105.6	-2.31953	7.57079e-10	78.5318	-2.78313	1.87249e-08
WBGene00004944	sol-1	122.975	-2.84685	3.32763e-15	99.2334	-2.47842	5.73442e-08
WBGene00004992	spp-7	311.287	-3.7203	9.16332e-40	261.078	-2.69504	4.0702e-12
WBGene00004993	spp-8	231.022	-3.16806	1.9188e-30	168.595	-4.61317	1.89944e-29
WBGene00004998	spp-13	661.684	-5.31955	3.50872e-73	513.152	-5.80635	1.98703e-70
WBGene00004999	spp-14	138.671	-3.08483	4.93854e-19	102.767	-4.04495	4.82315e-19
WBGene00005018	sqt-3	152927	-2.09055	2.79414e-19	117030	-2.25286	1.09654e-27
WBGene00005724	srv-13	93.483	-2.81865	3.6162e-11	74.1351	-2.68706	0.000180562
WBGene00006068	sto-6	88.3499	-3.56177	1.26483e-18	68.4108	-3.69339	1.38653e-10
WBGene00006408	tag-18	263.441	-5.10285	7.13247e-07	229.465	-2.78449	0.0158649
WBGene00006532	tba-6	120.05	-2.09034	7.4562e-08	92.6363	-2.15421	0.000265248
WBGene00006587	tnt-2	460.221	-2.60831	7.78333e-12	327.578	-4.09183	1.43722e-29
WBGene00006589	tnt-4	1968.65	-2.77194	7.88518e-22	1381.2	-5.07779	1.51061e-76
WBGene00006634	tsp-8	99.9515	-3.63169	6.65762e-12	80.7425	-3.13077	5.58712e-07
WBGene00006672	twk-18	608.351	-2.00098	1.54922e-10	423.929	-3.12586	2.69513e-24
WBGene00006762	unc-25	417.529	-3.84539	1.93886e-38	320.661	-4.34252	2.78709e-33
WBGene00006865	slcf-2	202.009	-3.89918	3.35461e-27	156.36	-4.14024	2.68661e-18
WBGene00006914	vha-5	1603.96	-3.61023	2.39481e-57	1230.28	-3.9935	1.48048e-42
WBGene00006915	vha-6	2582.5	-3.24924	1.1934e-73	2061.27	-2.94438	7.8046e-60
WBGene00006926	vit-2	6522.79	-4.77721	0.0144631	4997.6	-5.31719	0.00685044
WBGene00006927	vit-3	731.878	-5.22375	0.0023022	574.868	-4.6164	0.0136899
WBGene00006929	vit-5	2660.44	-5.64122	0.00978532	2071.07	-5.3521	0.010303
WBGene00006930	vit-6	4970.82	-4.62875	0.0108374	3781.66	-5.53933	0.00158877
WBGene00006947	wrt-1	11221.2	-8.71552	5.71603e-224	8767.57	-7.97987	2.79839e-275
WBGene00006948	wrt-2	8132.85	-5.25289	5.81516e-90	6238.82	-6.93924	4.00415e-214
WBGene00006950	wrt-4	1002.27	-5.81227	2.19787e-108	774.705	-7.08545	9.18815e-93
WBGene00006952	wrt-6	1343.92	-3.16457	1.68334e-36	973.843	-4.94632	1.86838e-97
WBGene00007174	mboa-1	350.078	-3.07322	7.35894e-24	252.228	-4.91665	4.45122e-30
WBGene00007185	nlp-36	410.269	-2.6151	8.6996e-25	313.539	-2.84783	5.73275e-23
WBGene00007214	C01A2.2	761.545	-2.01334	7.9744e-28	516.636	-3.55982	1.23081e-29
WBGene00007220	C01B9.1	190.168	-2.35289	2.87758e-13	150.892	-2.2198	1.70948e-10
WBGene00007336	C05C12.4	106.942	-3.7795	1.37148e-12	90.9059	-2.54396	6.95941e-08
WBGene00007343	C05E7.1	521.237	-3.58569	1.75328e-51	408.491	-3.52575	3.24227e-42
WBGene00007368	C06B8.2	648.935	-4.31745	4.26885e-42	498.969	-4.78889	1.65941e-55
WBGene00007401	C07A9.5	233.866	-5.1147	9.31693e-42	188.042	-4.05535	0.00035032
WBGene00007420	C07E3.10	232.489	-2.52494	4.86724e-15	163.372	-4.15349	7.62308e-23
WBGene00007425	C08B6.4	2172.51	-3.49579	7.41583e-67	1583.93	-5.94825	9.77385e-137
WBGene00007474	C08H9.15	345.597	-2.77327	2.54891e-18	270	-2.76171	1.78614e-15
WBGene00007552	C13C12.2	662.333	-2.70756	3.82033e-28	462.52	-5.06672	8.52259e-53
WBGene00007600	C15C6.1	556.878	-4.49561	1.83929e-60	424.015	-5.81323	5.1186e-11
WBGene00007751	C26G2.2	374.814	-2.6997	1.64438e-21	275.767	-3.49519	4.11273e-05
WBGene00007800	C29A12.6	462.276	-3.41369	2.18001e-32	366.291	-3.1798	6.18021e-05
WBGene00007817	C30F2.3	25.7359	-2.1088	0.00485703	19.8322	-2.22776	0.0118342
WBGene00007867	C32H11.4	469.748	-6.28971	6.16584e-82	366.442	-6.46963	3.6354e-57
WBGene00007883	C33A12.4	237.309	-4.58351	2.20261e-46	189.63	-3.92526	7.14696e-31
WBGene00007903	lgc-21	707.812	-2.5141	8.67232e-33	562.629	-2.33726	9.82827e-13
WBGene00007908	C34B4.3	51.1535	-2.54036	1.08495e-05	41.9959	-2.12635	0.00268338
WBGene00007916	C34C6.3	322.887	-3.762	4.65449e-33	258.747	-3.26826	3.13483e-24
WBGene00007949	C35A5.5	186.077	-4.81868	8.10372e-43	146.464	-4.4164	5.90578e-27
WBGene00007951	dmsr-8	103.967	-2.0616	2.01065e-08	80.847	-2.12777	0.000299332
WBGene00008076	lgc-43	266.363	-3.50212	9.38591e-28	208.522	-3.47209	6.59458e-16
WBGene00008194	C49C3.4	2479.53	-2.34638	4.65151e-29	1930.58	-2.37292	1.72201e-31
WBGene00008205	sams-1	9483.28	-2.70656	1.10659e-19	7170.19	-3.101	1.26513e-48
WBGene00008215	C49F8.3	698.319	-5.15091	5.35996e-45	535.197	-6.67575	1.35356e-82
WBGene00008263	C53A5.2	352.331	-3.97494	6.96326e-36	289.765	-3.07868	1.56918e-21
WBGene00008270	C53A5.13	120.728	-2.00813	4.09282e-08	84.7289	-3.06387	1.15814e-06
WBGene00008277	mltn-12	217.922	-3.62717	3.59435e-31	168.477	-3.84176	5.23464e-20
WBGene00008292	C54C8.4	53.9652	-2.84774	8.39731e-09	41.6552	-3.00623	1.74431e-06
WBGene00008462	E02H4.4	127.243	-4.15127	5.42208e-19	112.461	-2.33223	4.41666e-10
WBGene00008477	clec-17	184.306	-5.11183	4.1166e-40	156.655	-3.04243	1.00541e-18
WBGene00008496	F01D5.6	842.349	-2.48995	3.6017e-21	570.838	-5.53175	2.88964e-68
WBGene00008500	F01D5.10	204.95	-3.88425	3.3426e-25	159.663	-3.93499	5.59601e-26
WBGene00008509	F01G10.6	162.277	-3.68635	8.76487e-17	126.931	-3.6439	6.3227e-14
WBGene00008603	F09B9.4	431.357	-2.61373	1.29003e-33	340.171	-2.52269	2.74802e-19
WBGene00008604	F09B9.5	42.3984	-3.13327	2.60368e-08	36.3119	-2.19442	0.000948611
WBGene00008605	mlt-9	3369	-3.71903	3.35294e-73	2489.18	-5.77267	5.39205e-136
WBGene00008644	F10C2.3	118.664	-2.07175	2.77843e-06	83.9058	-3.07527	1.85361e-10
WBGene00008652	F10D11.6	3597.86	-3.75379	1.02509e-52	2764.18	-4.14697	1.65492e-75
WBGene00008692	scav-4	146.708	-2.09834	2.69418e-09	106.806	-2.75453	7.18858e-07
WBGene00008727	F13A7.12	181.74	-4.41254	1.55855e-28	153.891	-2.89944	4.22063e-13
WBGene00008732	F13B12.4	183.327	-3.47762	6.79585e-11	143.634	-3.42904	1.7486e-15
WBGene00008741	ctsa-1.2	1579.71	-4.01932	2.03487e-58	1198.32	-5.02039	1.57703e-17
WBGene00008743	F13D12.9	750.4	-2.24505	2.23065e-13	495.954	-5.27437	7.33661e-64
WBGene00008926	F17H10.2	333.484	-3.73207	4.09999e-35	261.377	-3.6347	1.95766e-24
WBGene00008936	papl-1	96.6612	-2.37248	3.32878e-07	67.7047	-3.75659	9.03032e-12
WBGene00008964	mltn-9	1403.54	-4.32035	3.7567e-61	1243.59	-2.38793	2.95692e-21
WBGene00008967	F20B10.3	94.3431	-2.01366	8.89882e-05	73.0043	-2.10958	0.000395473
WBGene00009041	cut-3	10460.3	-9.30644	0	8165.32	-9.7524	3.30957e-258
WBGene00009094	F23H12.5	4500.3	-4.69654	4.76977e-87	3508.54	-4.73969	6.85919e-128
WBGene00009144	del-3	424.562	-2.58532	4.60763e-17	308.599	-3.55393	5.83824e-29
WBGene00009157	F26E4.2	381.315	-2.18901	1.12882e-14	296.335	-2.2095	9.83583e-12
WBGene00009205	F28C6.5	49.751	-3.91506	1.30627e-09	40.3922	-3.23144	1.04831e-06
WBGene00009218	acs-20	2159.51	-2.53004	3.90411e-36	1524.53	-4.02744	2.51263e-62
WBGene00009259	hpo-34	6003.99	-3.0663	2.35306e-44	4825.9	-2.71314	3.81823e-51
WBGene00009292	F31D4.5	6520.16	-2.73445	4.87495e-27	4666.88	-4.21244	2.3829e-93
WBGene00009318	F32B4.8	344.344	-2.55778	3.9855e-21	243.1	-4.10523	0.000675338
WBGene00009331	F32D8.7	488.419	-4.2076	1.35769e-47	382.105	-4.17937	9.8056e-35
WBGene00009355	F33A8.7	1096.06	-2.54137	6.07403e-27	756.998	-4.7526	4.84066e-84
WBGene00009394	clec-63	1543.79	-2.16574	1.01044e-12	1089.54	-3.27005	1.60054e-35
WBGene00009396	clec-65	75.5824	-2.8769	5.23916e-12	63.1165	-2.19633	0.00161226
WBGene00009408	F35C12.3	66.4565	-3.28565	3.96063e-12	49.9731	-4.00911	1.47031e-10
WBGene00009475	F36F2.1	59.5995	-2.12814	0.000133508	43.0998	-2.82365	3.8325e-05
WBGene00009541	cutl-17	312.132	-4.16844	1.05463e-38	268.818	-2.60147	1.22369e-08
WBGene00009543	F38E11.6	57.3136	-2.20972	0.000383158	44.0189	-2.32895	0.000116571
WBGene00009561	F39D8.3	218.177	-3.32511	8.37301e-19	163.418	-4.2279	4.5572e-25
WBGene00009573	F40E10.5	582.447	-3.41488	1.46684e-25	423.491	-5.62089	3.28634e-47
WBGene00009578	F40F8.5	616.224	-2.33197	6.95865e-25	443.978	-3.23963	2.25681e-18
WBGene00009679	F44D12.2	240.278	-3.87518	6.58306e-25	191.614	-3.43361	3.95484e-17
WBGene00009773	lipl-2	183.69	-5.96437	2.08008e-38	147.062	-4.61877	9.46712e-25
WBGene00009791	F46F3.3	349.305	-4.48099	6.89019e-56	269.46	-4.89831	7.83672e-40
WBGene00009796	F46G10.1	283.885	-3.99023	2.97403e-32	248.472	-2.39089	1.1887e-14
WBGene00009813	haly-1	1152.31	-2.30626	3.25886e-27	909.042	-2.21743	1.08164e-22
WBGene00009830	cutl-18	742.16	-3.4324	1.99914e-52	539.309	-5.8644	1.58151e-12
WBGene00009982	F53F1.4	1329.02	-7.36345	1.64775e-148	1067.6	-4.82512	3.77864e-49
WBGene00009983	cut-2	17023	-8.37558	1.22298e-165	13332.2	-7.21772	3.78794e-46
WBGene00010001	F53F8.4	198.049	-3.70522	5.78796e-13	156.024	-3.53787	3.47406e-13
WBGene00010008	F53H4.3	489.701	-3.55468	2.18085e-22	371.786	-4.23016	1.37802e-28
WBGene00010049	F54D5.3	370.441	-4.09871	4.11308e-35	296.051	-3.56847	3.6188e-33
WBGene00010060	F54E4.4	52.5666	-3.23493	5.23445e-06	42.4044	-2.80689	3.25515e-05
WBGene00010070	nep-17	14958	-3.70148	7.5213e-59	11099.6	-5.45596	4.26611e-148
WBGene00010086	F55B11.4	71.7699	-2.98978	1.68831e-10	61.2305	-2.07893	0.000217217
WBGene00010150	F56D5.6	583.967	-2.97733	1.54697e-35	444.203	-3.35113	1.22124e-34
WBGene00010204	F57F5.1	406.755	-3.84293	6.32783e-33	309.152	-4.64085	2.84412e-08
WBGene00010268	arrd-10	406.379	-2.19649	1.76726e-14	270.759	-4.63793	4.87817e-32
WBGene00010285	F58H1.2	986.08	-5.42152	1.66149e-93	777.936	-4.84622	5.64253e-53
WBGene00010348	H01G02.1	125.739	-2.0036	0.000497808	87.5567	-3.11787	1.02942e-11
WBGene00010442	bus-12	551.72	-2.39916	4.51211e-27	379.517	-4.36244	6.76234e-49
WBGene00010461	K01D12.1	542.316	-7.66903	1.98981e-75	426.186	-6.48502	2.51125e-66
WBGene00010505	K02D3.2	355.463	-5.26671	1.92732e-10	279.05	-4.97119	6.99163e-45
WBGene00010605	K06G5.1	2415.64	-2.58126	9.42232e-27	1751.12	-3.576	3.62521e-67
WBGene00010673	K08E7.5	863.662	-5.59391	1.11999e-106	684.431	-4.786	4.38084e-08
WBGene00010714	mam-3	804.811	-6.70744	3.73716e-131	636.208	-5.44255	4.29284e-71
WBGene00010723	cpg-7	159.767	-3.21587	3.11095e-15	117.084	-4.63192	4.42407e-23
WBGene00010790	sodh-1	1200.22	-2.16518	1.36041e-26	846.226	-3.26802	2.30738e-24
WBGene00010811	hmit-1.3	335.732	-3.03657	8.34838e-28	258.163	-3.28941	1.01367e-12
WBGene00010834	mct-3	2078.78	-2.03095	1.89035e-28	1424.17	-3.42609	9.51417e-62
WBGene00010835	M03B6.3	4602.25	-7.8406	7.08719e-136	3610.27	-6.729	1.03838e-146
WBGene00010850	M04C3.1	675.238	-2.05064	1.03458e-16	492.533	-2.63074	1.13651e-26
WBGene00011004	R04B5.6	133.912	-3.19463	2.23043e-13	109.712	-2.6118	8.6728e-12
WBGene00011073	R07A4.2	32.1601	-2.54165	6.00669e-05	25.1188	-2.57244	0.0019565
WBGene00011075	R07A4.4	554.341	-4.88401	2.94799e-61	430.446	-5.07927	1.68916e-61
WBGene00011077	R07B1.5	68.0254	-2.90592	7.32755e-07	53.4309	-2.83262	1.44889e-05
WBGene00011103	R07E3.2	166.488	-2.10253	5.14401e-06	128.207	-2.19605	5.55336e-07
WBGene00011107	R07E3.6	5649.08	-4.52114	1.455e-85	4300.1	-5.87205	7.69486e-150
WBGene00011112	R07E5.4	222.977	-2.76095	6.78692e-12	164.721	-3.58083	5.46837e-15
WBGene00011182	R09H10.5	3995.02	-3.52161	3.52305e-90	2987.19	-4.60362	2.87083e-86
WBGene00011217	R10E11.5	102.643	-2.53517	2.92724e-07	78.58	-2.81164	3.4154e-05
WBGene00011222	R10H10.3	120.251	-2.52754	4.16474e-10	95.5828	-2.36286	6.19143e-09
WBGene00011235	suro-1	1148.35	-5.47856	2.17041e-63	919.51	-4.34748	3.5773e-37
WBGene00011272	dtmk-1	3966.55	-2.95767	1.34816e-66	3039.04	-3.19992	7.61585e-51
WBGene00011335	T01E8.8	285.876	-2.14421	1.28328e-08	192.58	-4.11584	4.47082e-32
WBGene00011337	T01G1.2	169.062	-2.96514	7.20521e-16	141.588	-2.25521	3.40813e-08
WBGene00011339	T01G5.1	216.519	-2.04196	3.81388e-10	144.662	-3.90592	7.42982e-17
WBGene00011400	T03F6.4	70.9286	-2.53413	3.33135e-06	53.2277	-3.03947	6.60414e-06
WBGene00011427	T04C12.1	195.496	-3.58716	2.30773e-27	153.631	-3.44009	2.38998e-22
WBGene00011462	vap-2	23.8264	-3.4973	5.28136e-06	20.9392	-2.20225	0.0181188
WBGene00011508	T05H10.3	17277.7	-4.85556	1.58463e-101	13538.2	-4.70426	4.51827e-124
WBGene00011572	mam-5	315.706	-4.10237	1.7941e-56	237.89	-5.56023	1.00471e-44
WBGene00011587	anp-1	509.084	-2.84711	2.40554e-39	406.33	-2.57963	1.83677e-21
WBGene00011590	bus-19	926.828	-3.58023	3.25233e-44	722.923	-3.59901	4.80962e-45
WBGene00011624	T08G5.3	240.927	-4.2529	1.583e-28	183.532	-5.03213	7.31157e-28
WBGene00011757	cht-2	332.102	-4.98398	2.27557e-44	255.772	-5.89795	1.41391e-42
WBGene00011773	ttr-53	190.001	-2.21369	1.20825e-12	150.18	-2.09428	1.48057e-09
WBGene00011796	T16G1.2	1334.01	-2.45723	5.24087e-15	911.882	-4.84082	5.61176e-64
WBGene00011803	T16G12.1	1462.27	-2.98938	1.6435e-39	1114.39	-3.34785	2.67802e-22
WBGene00011831	T19B10.2	6034.92	-2.45279	1.2263e-52	4858.86	-2.17866	6.20175e-40
WBGene00011856	T20D3.2	987.088	-5.97369	3.99003e-98	823.76	-3.53025	7.39458e-54
WBGene00011880	T21B6.3	3892.19	-3.51315	2.36838e-38	2941.35	-4.28533	1.57931e-58
WBGene00011888	cutl-15	545.238	-2.65716	7.76394e-29	402.991	-3.3798	2.35691e-30
WBGene00011948	rocf-1	5159.01	-2.77661	4.39962e-36	3606.23	-5.26359	3.40771e-75
WBGene00011955	cdka-1	984.583	-2.22422	5.11894e-12	784.299	-2.06373	2.74331e-15
WBGene00011971	lron-9	3314.61	-2.3501	1.09792e-32	2369.8	-3.39328	5.50673e-71
WBGene00012018	T25C12.3	7712.47	-4.57255	6.97694e-84	5963.71	-4.98523	6.73232e-123
WBGene00012032	T26C5.2	1599.25	-7.51269	1.20047e-117	1264.85	-5.72825	9.2093e-11
WBGene00012199	mltn-3	552.814	-4.73139	1.13411e-65	436.695	-4.30285	1.81983e-06
WBGene00012225	W03G11.3	337.469	-2.39063	5.4978e-16	263.068	-2.4131	6.99561e-18
WBGene00012253	clec-50	317.194	-2.67138	4.03957e-21	222.862	-4.66008	3.10104e-30
WBGene00012255	lpr-6	3628.46	-2.33686	8.64249e-26	2603.04	-3.32131	1.5152e-51
WBGene00012256	lpr-5	9109.88	-2.87744	9.81867e-49	6714.9	-3.77617	8.57936e-89
WBGene00012257	lpr-4	6224.5	-3.93696	1.44589e-81	4694.54	-5.10497	7.1505e-145
WBGene00012382	ttr-16	1549.95	-2.17717	1.74944e-19	1068.95	-3.68272	2.28978e-48
WBGene00012391	Y6B3B.7	92.1206	-2.40741	9.00556e-07	72.2011	-2.4172	0.000154877
WBGene00012433	Y11D7A.9	544.213	-5.26133	1.02326e-91	418.278	-6.59584	1.41173e-66
WBGene00012445	Y16B4A.2	5645.14	-5.28237	7.67633e-80	4387.13	-5.62036	9.50333e-23
WBGene00012540	Y37A1B.7	2204.97	-8.33569	1.45722e-33	1728.14	-6.89247	4.00327e-177
WBGene00012607	Y38F1A.4	98.8052	-3.20952	1.17841e-14	86.1523	-2.098	9.23455e-05
WBGene00012670	Y39B6A.8	132.625	-2.5943	4.35408e-12	97.4365	-3.3944	2.03667e-13
WBGene00012763	atln-2	93.9347	-2.70043	8.20665e-13	73.512	-2.67817	5.21668e-09
WBGene00012782	Y43C5A.2	1078.01	-4.07997	1.01946e-65	853.173	-3.7577	2.0827e-61
WBGene00012853	Y44A6D.2	177.63	-3.03625	4.53749e-20	142.894	-2.6798	1.13101e-12
WBGene00012875	Y45F10B.13	1059.89	-2.4344	1.61953e-19	749.557	-3.76901	5.84839e-31
WBGene00012940	Y47D3B.3	52.1373	-3.13081	1.04879e-06	43.0732	-2.46851	8.75999e-05
WBGene00012942	Y47D3B.6	1138.31	-3.57565	2.54828e-38	885.352	-3.69184	2.17124e-28
WBGene00012948	dhhc-2	255.784	-2.20326	2.18879e-17	186.228	-2.88994	5.50099e-21
WBGene00013081	txt-14	98.0421	-2.30206	1.61975e-06	73.2513	-2.75685	1.56286e-08
WBGene00013103	Y51H4A.7	285.725	-3.38212	3.60357e-14	220.071	-3.62506	7.00143e-13
WBGene00013171	Y53F4B.25	565.907	-4.38278	1.45283e-42	451.938	-3.776	7.7169e-38
WBGene00013173	Y53F4B.27	925.767	-4.89645	3.94388e-68	710.232	-5.87697	4.80472e-86
WBGene00013331	Y57G11C.42	349.757	-2.81262	2.95385e-21	255.965	-3.80734	4.56032e-05
WBGene00013352	lon-8	1911.78	-4.35946	1.79454e-125	1463.93	-5.09007	2.16924e-151
WBGene00013385	Y62E10A.19	465.663	-2.36403	4.90743e-21	328.509	-3.6453	2.14353e-18
WBGene00013426	Y66A7A.7	111.891	-2.86551	7.88276e-14	86.5016	-2.97451	5.43763e-08
WBGene00013497	hex-5	202.204	-2.93901	7.17356e-14	146.674	-4.36142	7.10025e-19
WBGene00013542	lron-12	256.538	-3.03063	2.21483e-22	188.07	-4.24536	4.02434e-29
WBGene00013574	lron-13	362.633	-2.21109	1.04589e-16	277.186	-2.39115	6.77359e-10
WBGene00013849	ZC84.6	1773.04	-2.15673	3.74026e-26	1367.91	-2.25588	8.86211e-30
WBGene00013852	hhat-1	3009.08	-3.13872	6.4433e-32	2188.47	-4.73082	1.00662e-119
WBGene00013872	ZC374.2	2968.9	-3.42883	4.38553e-48	2165.36	-5.55312	3.93071e-129
WBGene00013896	ZC443.1	256.502	-3.03148	3.37421e-11	187.178	-4.45266	1.07441e-20
WBGene00013965	ZK287.4	3868.79	-2.39028	1.09279e-16	2646.49	-4.52894	1.11197e-101
WBGene00014039	ZK662.2	192.098	-3.43632	3.11628e-21	161.656	-2.50985	3.34889e-11
WBGene00014178	ZK1010.4	80.9438	-3.39759	2.33011e-09	65.4349	-2.87693	7.73608e-08
WBGene00014253	ZK1320.3	103.514	-4.66015	3.36252e-20	93.4303	-2.32342	0.00077726
WBGene00014666	C05D12.3	472.907	-2.97066	9.14629e-25	344.653	-4.25735	0.00147354
WBGene00014821	R10E8.7	54.0781	-2.44924	3.75809e-05	38.7212	-3.62457	1.59509e-06
WBGene00015107	viro-2	244.456	-2.38714	2.89998e-11	174.932	-3.47472	6.74581e-17
WBGene00015124	anmt-1	80.7041	-2.03716	0.00011598	63.2646	-2.01278	0.00144897
WBGene00015169	B0403.5	297.638	-3.75667	1.30281e-18	231.489	-3.87653	2.11175e-22
WBGene00015280	C01B10.6	968.036	-3.69121	9.17547e-43	747.179	-3.96751	6.0102e-40
WBGene00015300	C01F1.5	168.927	-3.83421	3.53891e-25	130.831	-4.05099	0.000537563
WBGene00015426	C04E6.12	85.4135	-3.19064	2.51591e-07	66.883	-3.15864	3.81631e-07
WBGene00015527	C06E2.1	130.362	-2.05356	6.0772e-05	102.277	-2.00366	0.000255003
WBGene00015545	C06G1.1	1883.82	-3.08726	6.19917e-54	1427.42	-3.544	2.89099e-66
WBGene00015546	C06G1.2	449.403	-3.09335	6.98769e-17	364.013	-2.65912	4.14097e-13
WBGene00015566	C07D10.1	273.387	-2.10525	1.1966e-13	186.753	-3.70936	1.82292e-25
WBGene00015622	C09B8.3	82.2958	-2.78549	4.35419e-11	67.5248	-2.29275	5.4979e-06
WBGene00015645	lips-7	126.366	-3.28275	1.43702e-14	97.4279	-3.49723	4.15909e-08
WBGene00015646	mlt-10	2499.49	-3.39342	1.49802e-61	1941.08	-3.48528	2.00076e-78
WBGene00015713	C12D12.1	1755.07	-2.03456	1.59e-12	1292.21	-2.53358	5.51813e-27
WBGene00015716	sox-4	135.736	-2.80054	3.82235e-16	106.018	-2.80193	1.95934e-11
WBGene00015753	C14B9.3	398.026	-2.50084	6.44604e-22	283.746	-3.71672	1.83523e-15
WBGene00015781	C14F11.6	2611.54	-3.04625	1.2245e-56	2194.2	-2.26528	3.13684e-40
WBGene00015794	C15F1.1	143.139	-3.77748	1.0076e-13	116.494	-3.0755	5.54092e-08
WBGene00015841	skpo-2	2646.19	-4.32749	3.30561e-105	2004.11	-5.68104	3.29301e-129
WBGene00015949	C18A11.3	201.254	-4.24801	1.80032e-21	156.369	-4.32646	2.12077e-24
WBGene00015956	C18B2.5	2776.23	-3.41581	1.10864e-37	2144.75	-3.60201	2.3024e-85
WBGene00015980	C18G1.1	82.3297	-2.37859	0.000102461	66.2619	-2.15575	0.000585454
WBGene00016033	C24A3.2	731.767	-2.29947	1.3695e-15	591.966	-2.01935	1.1335e-14
WBGene00016101	C25E10.12	181.48	-2.34465	3.76109e-11	145.725	-2.1331	1.4454e-06
WBGene00016130	C26B2.8	309.92	-2.77834	4.24662e-15	238.682	-2.95468	1.23074e-16
WBGene00016134	C26B9.5	708.614	-4.30633	5.85964e-43	554.983	-4.20013	4.2775e-46
WBGene00016160	C27D6.1	67.4389	-4.15246	9.82107e-16	54.9467	-3.31471	3.05938e-08
WBGene00016218	pals-23	124.082	-3.97456	0.000239083	100.542	-3.24041	1.0829e-08
WBGene00016234	C29G2.6	677.054	-3.17566	8.98513e-35	508.095	-3.89778	1.88083e-42
WBGene00016259	C30F8.3	125.74	-3.40728	2.86056e-09	96.8142	-3.64782	1.68105e-15
WBGene00016324	C32E8.6	37.9247	-2.29527	0.00134807	29.0284	-2.50199	0.000964914
WBGene00016328	pde-5	140.871	-2.55819	1.0264e-10	99.7175	-3.98956	1.8361e-14
WBGene00016329	osr-1	746.772	-5.40043	1.85263e-11	599.379	-4.26655	2.46123e-37
WBGene00016431	C35A11.4	42.3943	-3.34881	4.64305e-06	37.3405	-2.12295	0.00575757
WBGene00016532	C39D10.5	68.9641	-2.92258	2.84376e-07	58.545	-2.17088	0.00431724
WBGene00016542	C39H7.4	475.451	-3.93359	5.95087e-63	377.71	-3.56218	2.08131e-43
WBGene00016568	C41G11.1	64.5129	-3.12349	8.59164e-11	56.0826	-2.0161	0.00278313
WBGene00016585	oac-59	112.825	-2.14855	3.70125e-10	79.5849	-3.20697	6.65987e-12
WBGene00016677	C45G9.6	81.1835	-2.14839	4.06182e-06	57.4854	-3.19911	1.74003e-07
WBGene00016700	C46A5.4	2754.77	-3.85715	7.48545e-88	2032.55	-6.48459	3.42602e-188
WBGene00016721	C46G7.1	168.313	-2.76242	6.47994e-12	137.531	-2.33381	4.91984e-08
WBGene00016731	C46H11.7	137.327	-5.08183	5.5697e-27	106.784	-5.22139	5.78188e-23
WBGene00016733	phat-2	551.57	-4.96411	5.76368e-74	438.983	-4.25238	4.46472e-36
WBGene00016769	C49C8.5	165.695	-3.71428	2.32698e-20	145.199	-2.27404	1.56333e-08
WBGene00016805	C50D2.1	683.508	-4.48811	5.88317e-66	523.014	-5.38577	3.69579e-58
WBGene00016938	C54H2.4	43.5799	-2.75613	3.30604e-06	35.1578	-2.501	0.00413571
WBGene00016962	C56C10.4	933.573	-4.63586	4.40887e-63	720.427	-5.16396	3.51418e-08
WBGene00017018	D1014.5	1464.95	-5.89918	2.21472e-116	1138.03	-6.34015	1.31175e-17
WBGene00017036	D1069.1	53.9061	-2.09725	0.000148983	39.5989	-2.61751	0.000340324
WBGene00017067	not found	98.4934	-2.52374	3.82493e-08	78.5338	-2.34206	1.69827e-06
WBGene00017073	D2096.6	617.78	-2.58863	5.79879e-11	451.143	-3.48425	3.59975e-24
WBGene00017193	F07C3.2	139.237	-2.20007	1.55883e-06	95.7092	-3.77431	9.45483e-17
WBGene00017262	F08F3.4	166.368	-3.42265	1.3759e-19	137.527	-2.6633	3.71922e-10
WBGene00017306	F09F9.1	122.819	-2.66152	4.93255e-14	95.7443	-2.66295	3.42964e-10
WBGene00017307	F09F9.2	671.06	-6.34022	2.30515e-100	525.829	-6.03062	1.77692e-60
WBGene00017374	ttr-41	763.003	-2.16029	6.06606e-19	575.943	-2.45383	5.65998e-13
WBGene00017429	F13D11.4	573.972	-2.70169	6.23579e-28	419.733	-3.61028	6.038e-26
WBGene00017430	bcl-11	5064.68	-2.84494	3.95797e-24	3818.7	-3.34064	5.1906e-44
WBGene00017438	F13H8.5	1512.4	-3.27509	6.89729e-24	1118.15	-4.52105	9.00779e-09
WBGene00017483	lgc-22	5123.87	-6.00186	2.56895e-130	3971.13	-6.79733	2.07274e-32
WBGene00017515	F16F9.4	365.494	-3.89097	3.67403e-34	284.431	-3.95254	1.11802e-43
WBGene00017535	atf-8	825.478	-4.6362	2.42056e-71	649.596	-4.36237	1.12694e-10
WBGene00017569	F18E9.3	549.438	-6.09395	3.40945e-68	437.022	-4.96609	5.08962e-38
WBGene00017591	F19C7.1	1477.81	-2.97862	1.47815e-40	1108.73	-3.58637	2.95156e-40
WBGene00017597	F19C7.8	1118.59	-2.57459	1.64257e-36	827.027	-3.22934	6.26455e-57
WBGene00017621	txt-17	53.731	-3.98942	1.35783e-09	48.2824	-2.22678	0.0057077
WBGene00017716	sups-1	3090.67	-5.93614	5.88813e-165	2403.42	-6.34105	5.47421e-99
WBGene00017721	F22F7.3	171.309	-2.8731	1.99264e-13	126.377	-3.72376	8.25412e-18
WBGene00017723	bgnt-1.2	362.485	-5.7737	1.10536e-75	281.176	-6.26348	1.64767e-51
WBGene00017783	F25E5.2	58.7661	-2.7403	3.85723e-06	43.4967	-3.46992	6.67117e-08
WBGene00017794	mltn-13	50.399	-4.6348	1.73861e-14	40.8833	-3.67433	1.65886e-07
WBGene00017807	F26A1.9	93.4419	-4.09718	7.20799e-17	73.3956	-4.05385	1.6733e-11
WBGene00017892	F28B4.3	4629.93	-3.65819	7.89338e-44	3541.48	-4.13946	1.67457e-62
WBGene00017950	F31E3.2	284.253	-2.40205	7.46026e-17	208.182	-3.09095	1.93966e-11
WBGene00017969	ctsa-3.1	696.424	-4.01225	8.82139e-65	520.093	-6.01629	1.0487e-65
WBGene00017991	clec-180	3790.01	-2.66746	8.26296e-29	2698.32	-4.17633	5.08319e-94
WBGene00017998	F33D4.6	5508.53	-6.40895	1.17131e-162	4283.74	-6.82516	3.19225e-145
WBGene00018026	F35A5.4	120.699	-4.98412	5.03735e-26	98.0594	-3.80649	5.03933e-11
WBGene00018040	F35D2.2	71.4824	-2.39314	2.66247e-07	51.9029	-3.28672	4.08257e-07
WBGene00018221	F40A3.6	193.583	-4.04477	5.44684e-37	173.907	-2.20039	4.19079e-10
WBGene00018237	irg-7	10891.3	-4.03249	1.86864e-87	8785.22	-3.38594	1.83967e-69
WBGene00018282	F41D9.2	616.725	-3.65364	3.50357e-40	467.599	-4.36711	5.30271e-46
WBGene00018292	F41E6.11	222.42	-3.43894	8.15466e-20	171.785	-3.6604	4.58703e-12
WBGene00018293	F41E6.12	432.516	-5.08213	8.20519e-40	349.147	-3.88673	9.47096e-33
WBGene00018297	F41F3.3	16627	-11.156	0	13039.4	-7.64475	3.54429e-15
WBGene00018377	hum-10	77.0878	-3.10469	1.11021e-07	58.4255	-3.56104	4.25109e-07
WBGene00018487	F46C8.8	529.666	-2.2315	4.73259e-22	397.361	-2.58097	6.2468e-22
WBGene00018594	aman-3	125.128	-2.05464	3.02279e-10	97.3551	-2.06927	0.000287566
WBGene00018630	F49D11.6	506.217	-6.96262	5.11534e-91	404.385	-4.98415	3.9978e-06
WBGene00018646	mul-1	84.0961	-4.28504	1.03863e-10	67.5547	-3.66453	1.58598e-11
WBGene00018694	F52E1.5	209.154	-5.2048	1.5024e-35	174.194	-3.41908	2.39168e-16
WBGene00018713	F52G3.5	309.277	-5.17667	1.26029e-40	258.471	-3.32771	1.01726e-18
WBGene00018726	F53A9.3	60.6028	-2.77873	4.93983e-07	51.5937	-2.0056	0.014724
WBGene00018737	F53B1.4	6281.19	-5.82568	9.62785e-178	4868.42	-6.47553	7.35506e-191
WBGene00018899	F55G1.1	125.275	-2.21996	4.02796e-07	100.471	-2.02399	8.1203e-05
WBGene00018951	F56C9.7	370.008	-3.32879	1.91341e-31	273.197	-4.6024	1.60989e-42
WBGene00018969	F56D3.1	4475.92	-4.48769	6.68449e-100	3380.97	-6.48531	9.58373e-205
WBGene00018971	clec-67	175.484	-2.36491	1.05765e-08	131.527	-2.78618	7.91035e-07
WBGene00019017	F57F4.4	8567.47	-2.6015	1.31326e-25	5902.29	-5.20556	3.58627e-140
WBGene00019097	F59B1.2	229.064	-4.30202	1.84965e-18	182.858	-3.71808	2.40028e-24
WBGene00019148	H03E18.1	6307.68	-3.87066	7.11039e-72	4765.2	-4.90441	7.2754e-123
WBGene00019154	glf-1	4235.89	-3.84189	8.39245e-72	3134.07	-6.0362	7.16796e-142
WBGene00019155	H04M03.11	23.532	-3.04438	0.00024859	19.6685	-2.3225	0.00773951
WBGene00019184	H10E21.4	535.442	-4.68432	3.94684e-46	420.099	-4.54389	1.85082e-46
WBGene00019261	H34I24.2	632.866	-5.2419	3.75806e-80	521.27	-3.59572	2.2982e-32
WBGene00019272	H42K12.3	5514.44	-2.28601	8.88369e-38	4096.21	-2.76467	1.65296e-33
WBGene00019273	H43E16.1	417.155	-5.47127	2.13788e-45	350.369	-3.34137	0.000284827
WBGene00019285	cbn-1	1086.38	-4.44473	9.78217e-92	833.697	-5.17992	2.85173e-70
WBGene00019424	aptf-1	62.5613	-2.87986	6.42779e-11	45.962	-3.78054	4.8483e-09
WBGene00019435	K06A9.1	3826.58	-3.20778	3.51976e-27	2858.55	-4.06895	3.79437e-49
WBGene00019489	K07E1.1	40.1551	-3.07919	0.000942886	32.8529	-2.56257	0.00761802
WBGene00019520	K08B12.1	4434.22	-6.63163	5.86719e-103	3512.65	-5.30862	3.10643e-179
WBGene00019565	cyp-35A3	592.205	-2.39706	1.00907e-28	459.218	-2.45257	2.60343e-25
WBGene00019617	ctsa-2	6854.93	-3.26883	1.02059e-35	5023.7	-4.8551	4.10832e-16
WBGene00019649	exc-14	114.397	-2.27856	3.68799e-10	84.9069	-2.78278	9.26706e-10
WBGene00019682	K12H4.7	480.295	-2.34803	2.14085e-19	337.912	-3.68655	2.6244e-33
WBGene00019713	pqn-52	1087.08	-2.0193	2.86215e-12	724.788	-3.96661	3.14845e-33
WBGene00019761	M03F8.1	232.37	-3.66286	9.40195e-31	181.434	-3.63655	2.40008e-14
WBGene00019779	endu-2	218.649	-5.10103	6.46292e-27	176.789	-3.93456	4.87482e-21
WBGene00019828	R02E12.4	98.8449	-2.33064	1.02515e-06	72.4567	-3.03655	4.15302e-06
WBGene00019839	R02F11.1	4648.77	-2.0484	1.19338e-13	3023.31	-4.87635	1.64307e-132
WBGene00019866	R04B3.1	304.921	-3.75277	7.05278e-41	243.594	-3.32463	7.303e-14
WBGene00019868	R04B3.3	391.657	-2.2494	1.94176e-19	280.041	-3.16423	3.76316e-13
WBGene00019904	twk-49	137.518	-2.52717	4.41825e-13	99.3277	-3.50689	3.64212e-11
WBGene00019906	R05G9R.1	2128.95	-5.27987	2.79289e-165	1653.08	-5.59375	3.81121e-127
WBGene00019935	R07E4.1	661.561	-3.85841	2.52394e-62	521.647	-3.62526	7.42333e-42
WBGene00019957	R08E3.1	2413.35	-4.30188	5.10083e-105	1866.32	-4.61834	1.269e-69
WBGene00019979	R09B5.11	154.807	-3.48385	3.04318e-16	120.645	-3.49329	8.98657e-10
WBGene00020012	R11G1.6	3007.74	-2.0016	9.50335e-30	2269.05	-2.26008	1.52414e-39
WBGene00020083	R57.2	227.237	-3.58091	1.41045e-23	176.053	-3.72234	1.23082e-15
WBGene00020148	T01D1.3	83.6412	-4.92015	7.46717e-20	67.8499	-3.84891	3.73528e-10
WBGene00020149	T01D1.4	1611.92	-4.13255	3.85049e-91	1201.78	-6.64812	1.65856e-19
WBGene00020192	T03F1.11	98.7968	-2.80045	1.11165e-06	70.8324	-4.40751	2.3749e-10
WBGene00020194	T03G6.1	2353.19	-4.09053	4.94541e-51	1824.4	-4.26174	1.61799e-75
WBGene00020195	T03G6.3	1327.32	-2.30988	9.57579e-32	976.704	-2.92178	1.29339e-28
WBGene00020242	phat-5	1094.34	-5.54231	1.84454e-95	868.244	-4.74929	8.21014e-69
WBGene00020256	T05C3.6	164.507	-2.53377	4.27334e-13	129.984	-2.38485	1.07488e-07
WBGene00020277	T06A1.1	339.458	-3.33199	8.72547e-33	261.197	-3.55765	0.000219342
WBGene00020294	T06F4.1	173.935	-2.03828	1.66205e-09	127.377	-2.58418	1.02871e-08
WBGene00020340	T08B1.1	349.347	-2.69801	9.04803e-14	278.002	-2.5067	3.10204e-20
WBGene00020343	acs-3	399.455	-2.91055	1.20466e-35	308.122	-3.04425	1.19107e-17
WBGene00020360	math-41	545.875	-3.5835	9.19034e-36	465.791	-2.44061	7.63108e-12
WBGene00020378	T09B4.4	152.898	-2.33179	2.62669e-10	113.793	-2.8149	6.82579e-11
WBGene00020384	T09D3.3	251.759	-4.78413	7.4581e-34	212.21	-3.05901	2.61706e-16
WBGene00020396	T10B5.10	219.878	-3.14106	3.61242e-23	161.601	-4.33701	2.06884e-21
WBGene00020455	fbxa-59	78.0694	-3.13402	1.53013e-08	58.5855	-3.70638	8.62886e-09
WBGene00020478	T13C2.2	358.53	-2.08022	3.19585e-11	263.74	-2.60563	1.79787e-19
WBGene00020487	T13C5.7	68.5639	-2.37789	9.22304e-08	53.0476	-2.46727	5.99358e-05
WBGene00020497	T14A8.2	204.355	-3.2995	7.35166e-22	154.921	-3.85708	1.79313e-13
WBGene00020551	T17H7.7	898.949	-3.40513	1.1088e-35	709.24	-3.22974	5.4297e-30
WBGene00020554	T19A5.3	7767.61	-3.48675	3.41766e-82	5749.42	-4.91212	5.42879e-98
WBGene00020571	lpr-7	786.089	-2.5604	8.40594e-34	577.2	-3.33195	3.59412e-40
WBGene00020576	T19D12.1	3510.08	-4.34886	9.02203e-64	2720.88	-4.60674	3.20805e-16
WBGene00020626	T20F5.4	13105.1	-2.28766	3.19883e-28	9191.47	-3.59242	1.78625e-47
WBGene00020660	T21G5.2	170.104	-3.92826	6.26532e-18	131.476	-4.19463	3.10204e-20
WBGene00020662	T21H3.1	78.3495	-2.6407	9.58739e-08	59.9819	-2.92101	6.41185e-06
WBGene00020743	mam-8	411.962	-3.53995	8.62018e-30	315.481	-3.94702	8.25731e-22
WBGene00020788	nep-22	980.34	-2.64716	1.88387e-26	721.859	-3.41706	1.66886e-22
WBGene00020803	T25E4.1	415.021	-6.12582	4.47847e-58	330.12	-4.9591	3.15018e-29
WBGene00020813	T25G12.6	74.8614	-2.28156	2.04494e-05	59.584	-2.12802	0.000684109
WBGene00020836	lgc-34	433.413	-3.53024	2.39932e-34	350.784	-2.96656	6.25834e-24
WBGene00020846	T27A10.6	5947.06	-2.05896	1.92519e-23	4361.09	-2.5996	6.55374e-38
WBGene00020884	T28B4.1	155.528	-2.49954	7.22853e-14	123.594	-2.36057	9.73026e-05
WBGene00020903	acd-5	117.759	-2.16733	2.39751e-06	82.9823	-3.31046	7.72395e-10
WBGene00020971	W03B1.1	87.0175	-2.64392	4.04837e-07	68.0159	-2.58809	4.09684e-05
WBGene00020976	oac-51	1227	-2.65779	1.20382e-45	921.135	-3.14041	8.04332e-38
WBGene00020983	W03D2.9	206.305	-5.31984	9.95135e-44	168.504	-3.75343	5.35548e-25
WBGene00021124	W10C4.1	397.843	-2.22785	6.76476e-20	308.983	-2.27929	8.44054e-10
WBGene00021157	Y4C6B.3	30.6799	-3.19861	2.26702e-06	24.1139	-3.08228	0.000165752
WBGene00021279	Y23H5B.8	323.664	-2.17625	2.30346e-15	242.071	-2.55648	2.03324e-17
WBGene00021322	Y34B4A.6	611.29	-2.45999	4.82387e-24	475.657	-2.50102	3.80227e-21
WBGene00021325	Y34B4A.9	652.869	-2.65701	3.97671e-18	521.693	-2.44102	3.85919e-12
WBGene00021326	Y34B4A.10	738.374	-6.56784	4.34403e-13	584.506	-5.30718	1.64527e-63
WBGene00021389	Y38A10A.2	1032.52	-5.7418	1.44519e-97	799.752	-6.40331	5.69793e-105
WBGene00021503	ctsa-4.2	107.766	-5.15249	1.16976e-24	98.9638	-2.26508	0.00127706
WBGene00021597	spsb-1	1994.83	-2.2083	6.26411e-23	1536.47	-2.32434	9.0201e-22
WBGene00021625	Y47D7A.13	4048.83	-6.24081	2.33984e-99	3212.29	-5.13079	1.1602e-09
WBGene00021645	Y47G6A.19	135.173	-2.06078	5.4733e-06	94.3775	-3.26929	8.08807e-08
WBGene00021768	Y51F10.7	272.139	-3.99669	7.71454e-40	244.82	-2.14524	1.43417e-12
WBGene00021850	Y54F10AM.6	1098.26	-3.13966	3.30912e-35	843.621	-3.39304	3.33875e-58
WBGene00021879	clec-83	420.145	-3.67466	2.97331e-34	334.73	-3.30909	2.1116e-20
WBGene00021942	madf-1	225.106	-2.70628	6.1056e-22	160.187	-4.28788	1.6175e-23
WBGene00022047	Y66H1A.5	83.3727	-3.76594	1.69517e-18	67.4811	-3.18729	1.44526e-07
WBGene00022155	Y71G12B.17	321.236	-2.85621	2.58323e-16	245.047	-3.13852	2.42018e-18
WBGene00022160	Y71G12B.25	6928.94	-3.28793	3.5365e-40	5125.95	-4.50442	5.67158e-100
WBGene00022274	Y73E7A.8	3087.75	-4.23426	1.48215e-55	2351.41	-5.2106	7.29178e-129
WBGene00022287	Y75B7AR.1	117.473	-2.19456	2.36063e-06	88.4947	-2.54872	8.5303e-07
WBGene00022382	Y94H6A.10	312.329	-3.32708	1.32041e-29	245.523	-3.2335	1.43768e-27
WBGene00022415	Y102A11A.5	1295.97	-3.72428	1.97433e-38	975.402	-4.77414	1.89954e-48
WBGene00022423	nhr-41	2516.02	-2.43788	1.1468e-38	1830	-3.26726	5.86441e-73
WBGene00022474	zig-9	171.828	-3.74713	1.95665e-25	140.953	-2.9295	7.91675e-14
WBGene00022497	Y119D3B.21	440.366	-3.8329	1.43854e-45	378.065	-2.51053	3.24611e-19
WBGene00022503	ZC13.2	103.552	-2.67032	1.31444e-09	74.4088	-4.01276	2.23328e-12
WBGene00022515	ttr-48	909.632	-3.38255	1.79844e-47	749.694	-2.65632	1.48597e-23
WBGene00022517	ZC123.1	5644.19	-3.72761	5.49885e-61	4132.18	-6.76285	1.92469e-209
WBGene00022577	nstp-3	476.573	-4.87313	5.72217e-82	369.727	-5.08707	2.38655e-52
WBGene00022610	ltah-1.2	275.855	-3.61125	1.1181e-27	206.847	-4.73448	1.47713e-21
WBGene00022611	ZC449.1	465.167	-4.58593	1.51633e-48	361.325	-4.77511	3.83644e-45
WBGene00022612	ZC449.2	919.389	-4.09051	4.89191e-93	708.318	-4.47758	3.99663e-83
WBGene00022614	ZC449.4	122.06	-2.5801	2.04244e-13	86.1722	-4.20358	3.53206e-17
WBGene00022633	ZC581.3	436.464	-2.38055	3.46373e-13	315.338	-3.26425	4.27041e-24
WBGene00022649	ZK84.1	2585.51	-2.88358	7.66282e-17	1893.39	-3.97679	5.63918e-41
WBGene00022665	ZK154.1	994.012	-3.92935	1.37974e-54	736.08	-6.36284	3.88265e-94
WBGene00022679	ZK180.5	7902.1	-8.01461	2.55296e-159	6221.36	-6.33418	5.18472e-09
WBGene00022767	ZK563.2	80.3313	-2.33466	0.000292161	62.7089	-2.30489	1.12134e-05
WBGene00023407	cex-1	155.131	-2.44307	1.17206e-08	110.631	-3.72083	5.74837e-10
WBGene00044016	C35A5.10	55.0297	-3.46051	7.1103e-11	42.2807	-3.75865	2.52604e-08
WBGene00044024	C35A5.11	2044.24	-6.17774	1.56236e-14	1602.34	-5.74539	3.44934e-148
WBGene00044150	VB0395L.1	46.6034	-2.66854	6.13205e-05	37.0007	-2.50671	0.000278451
WBGene00044227	C07A9.13	93.1045	-3.18856	1.69435e-14	74.2601	-2.87755	4.83112e-09
WBGene00044294	C01B10.11	1549.89	-2.34371	3.26457e-38	1101.81	-3.46869	5.2966e-61
WBGene00044394	B0034.7	146.337	-2.09546	9.68102e-07	110.347	-2.39483	2.49777e-08
WBGene00044395	R12C12.10	201.525	-6.4951	1.51917e-40	162.842	-4.41183	2.30738e-24
WBGene00044445	C02F5.14	99.2881	-2.55887	3.32653e-07	74.4869	-3.08245	4.28223e-08
WBGene00044452	Y102E9.5	124.126	-2.05684	4.73379e-06	84.1677	-3.64754	4.13765e-15
WBGene00044463	W09G12.10	719.422	-4.69101	3.65665e-81	548.437	-6.07645	2.11197e-63
WBGene00044500	T19E7.6	184.163	-3.61761	2.5664e-29	141.612	-3.9167	2.12704e-23
WBGene00044530	F32D1.11	147.683	-2.92176	4.45144e-13	123.253	-2.26046	9.55961e-08
WBGene00044620	bus-4	269.786	-2.22953	1.90126e-13	208.083	-2.33466	3.40465e-12
WBGene00044623	bus-8	4353.1	-2.56819	2.02881e-30	3029.45	-4.60094	1.94569e-87
WBGene00044630	bus-17	549.418	-2.06201	2.69522e-25	381.655	-3.25364	1.54653e-30
WBGene00044724	R02E4.3	267.542	-3.41232	5.56768e-28	208.461	-3.46876	0.000352791
WBGene00044792	F59C6.14	49.7449	-2.84499	1.70792e-05	38.8714	-2.89994	5.78087e-05
WBGene00044898	let-383	452.274	-3.0322	1.25532e-30	329.403	-4.36703	1.08534e-35
WBGene00045481	M153.5	59.9684	-2.26019	2.25261e-06	41.3088	-3.96138	1.0203e-08
WBGene00077491	K08H10.10	52.756	-3.06934	1.38433e-06	45.4823	-2.05087	0.00239604
WBGene00077697	F58E6.13	735.469	-2.56072	7.23228e-39	502.35	-5.43581	3.63395e-61
WBGene00189995	C06E7.88	457.962	-4.89256	1.66015e-65	378.975	-3.36988	1.01869e-33
WBGene00219208	B0365.9	291.815	-3.20529	4.01571e-22	226.14	-3.31637	9.17451e-27
WBGene00219436	C49H3.16	365.239	-4.3289	1.68453e-41	284.444	-4.37366	1.06259e-40
WBGene00220093	T25C12.11	306.08	-2.44659	1.64927e-12	208.6	-4.94709	5.05413e-35
WBGene00220094	T25C12.12	292.636	-2.52596	0.00345144	199.187	-5.57644	3.67775e-31
